# Supplementary material for: The Niwot Ridge Subalpine Forest US-NR1 AmeriFlux site – Part 1: Data acquisition and site record-keeping
Source: Copernicus journal article supplement (doi:10.5194/gi-5-451-2016), 2016-09-29
Supplement: Supplementary file 1 [file gi-5-451-2016-supplement.zip]

# ***Supplemental File for “The Niwot Ridge Subalpine Forest US-NR1 AmeriFlux site – Part I: Data acquisition and site record-keeping”***

***by S. P. Burns et al.***

## **README for: USNR1\_webcalendar.zip**

**S. P. Burns et al.**

sean@ucar.edu

Date: September 8, 2016

This is an archive of the web calendar used at the Niwot Ridge US-NR1 AmeriFlux site. It is a duplicate of the HTML shown here:

<http://urquell.colorado.edu/calendar/>

to look at the calendar pages in the zip archive, open the HTML files in a web browser such as:

firefox calendar/index.html

or,

firefox calendar/2004.html

or,

firefox calendar/2012.6.html

The files included are:

```
-rw-rw-r-- 1 sburns  httpd  4098 Sep  1 00:05 1998.10.html
-rw-rw-r-- 1 sburns  httpd  5079 Sep  1 00:50 1998.11.html
-rw-rw-r-- 1 sburns  httpd  3509 Sep  6 13:00 1998.12.html
-rw-rw-r-- 1 beaurejm httpd  2662 Jan 31 2007 1998.1.html
-rw-rw-r-- 1 beaurejm httpd  2539 Jan 31 2007 1998.2.html
-rw-rw-r-- 1 beaurejm httpd  2685 Jan 31 2007 1998.3.html
-rw-rw-r-- 1 beaurejm httpd  2681 Feb 16 2007 1998.4.html
-rw-rw-r-- 1 beaurejm httpd  3160 Jan 31 2007 1998.5.html
-rw-rw-r-- 1 beaurejm httpd  2852 Apr 25 2008 1998.6.html
-rw-rw-r-- 1 beaurejm httpd  2722 Jan 31 2007 1998.7.html
-rw-rw-r-- 1 beaurejm httpd  3102 Jan 31 2007 1998.8.html
-rw-rw-r-- 1 beaurejm httpd  2763 Jan 31 2007 1998.9.html
-rw-rw-r-- 1 sburns  httpd  2081 Sep  6 12:59 1998.html

-rw-rw-r-- 1 sburns  httpd  4800 Sep  4 22:02 1999.10.html
-rw-rw-r-- 1 sburns  httpd  4430 Sep  4 22:20 1999.11.html
```

```

-rw-rw-r-- 1 sburns      httpd  4198 Sep  4 22:47 1999.12.html
-rw-rw-r-- 1 beaurejm    httpd  4065 Apr 25  2008 1999.1.html
-rw-rw-r-- 1 sburns      httpd  3623 Sep  5 09:37 1999.2.html
-rw-rw-r-- 1 sburns      httpd  3846 Sep  3 00:44 1999.3.html
-rw-rw-r-- 1 sburns      httpd  3499 Sep  3 00:51 1999.4.html
-rw-rw-r-- 1 sburns      httpd  4826 Sep  3 01:06 1999.5.html
-rw-rw-r-- 1 sburns      httpd  6334 Sep  3 22:39 1999.6.html
-rw-rw-r-- 1 sburns      httpd  5483 Sep  4 15:12 1999.7.html
-rw-rw-r-- 1 sburns      httpd  6247 Sep  4 15:11 1999.8.html
-rw-rw-r-- 1 sburns      httpd  5959 Sep  4 15:30 1999.9.html
-rw-rw-r-- 1 sburns      httpd  2081 Sep  6 12:58 1999.html

-rw-rw-r-- 1 sburns      httpd  4438 Sep  6 01:07 2000.10.html
-rw-rw-r-- 1 sburns      httpd  3101 Sep  6 01:11 2000.11.html
-rw-rw-r-- 1 sburns      httpd  3221 Jan  4  2011 2000.12.html
-rw-rw-r-- 1 sburns      httpd  3840 Sep  4 22:51 2000.1.html
-rw-rw-r-- 1 sburns      httpd  3463 Sep  4 22:59 2000.2.html
-rw-rw-r-- 1 sburns      httpd  4140 Sep  4 23:09 2000.3.html
-rw-rw-r-- 1 sburns      httpd  4440 Sep  4 23:30 2000.4.html
-rw-rw-r-- 1 sburns      httpd  4641 Sep  4 23:48 2000.5.html
-rw-rw-r-- 1 sburns      httpd  4276 Sep  5 00:18 2000.6.html
-rw-rw-r-- 1 sburns      httpd  5584 Sep  5 08:36 2000.7.html
-rw-rw-r-- 1 sburns      httpd  4593 Sep  5 01:15 2000.8.html
-rw-rw-r-- 1 sburns      httpd  5433 Sep  6 00:45 2000.9.html
-rw-rw-r-- 1 sburns      httpd  2081 Sep  6 12:58 2000.html

-rw-rw-r-- 1 sburns      httpd  2985 May 31 13:53 2001.10.html
-rw-rw-r-- 1 beaurejm    httpd  2743 Feb  6  2007 2001.11.html
-rw-rw-r-- 1 sburns      httpd  3171 Jan  4  2011 2001.12.html
-rw-rw-r-- 1 sburns      httpd  2657 Jan  4  2011 2001.1.html
-rw-rw-r-- 1 sburns      httpd  3437 Sep  7 00:45 2001.2.html
-rw-rw-r-- 1 sburns      httpd  3222 Sep  7 00:47 2001.3.html
-rw-rw-r-- 1 beaurejm    httpd  2682 Jan 26  2007 2001.4.html
-rw-rw-r-- 1 beaurejm    httpd  2756 Jan 26  2007 2001.5.html
-rw-rw-r-- 1 sburns      httpd  2898 Feb  2  2011 2001.6.html
-rw-rw-r-- 1 beaurejm    httpd  2719 Jan 29  2007 2001.7.html
-rw-rw-r-- 1 sburns      httpd  3370 May 31 13:53 2001.8.html
-rw-rw-r-- 1 beaurejm    httpd  3169 Jan 29  2007 2001.9.html
-rw-rw-r-- 1 sburns      httpd  2081 Sep  6 12:57 2001.html

-rw-rw-r-- 1 sburns      httpd  2721 Jun  6 10:01 2002.10.html
-rw-rw-r-- 1 sburns      httpd  2746 Jan  8  2007 2002.11.html
-rw-rw-r-- 1 sburns      httpd  2714 Jan  8  2007 2002.12.html
-rw-rw-r-- 1 sburns      httpd  4251 Jan  4  2011 2002.1.html
-rw-rw-r-- 1 sburns      httpd  4092 Jan  4  2011 2002.2.html
-rw-rw-r-- 1 sburns      httpd  3745 Jan 24  2011 2002.3.html
-rw-rw-r-- 1 beaurejm    httpd  2681 Jan 22  2007 2002.4.html
-rw-rw-r-- 1 sburns      httpd  3733 Jan  4  2011 2002.5.html

```

```

-rw-rw-r-- 1 beaurejm httpd 3198 Jan 22 2007 2002.6.html
-rw-rw-r-- 1 sburns httpd 6064 Sep 3 22:05 2002.7.html
-rw-rw-r-- 1 sburns httpd 6781 Sep 3 22:14 2002.8.html
-rw-rw-r-- 1 sburns httpd 7563 Jul 30 2013 2002.9.html
-rw-rw-r-- 1 sburns httpd 2081 Sep 6 12:56 2002.html

-rw-rw-r-- 1 sburns httpd 6484 Jan 10 2004 2003.10.html
-rw-rw-r-- 1 sburns httpd 6482 Jan 10 2004 2003.11.html
-rw-rw-r-- 1 sburns httpd 3982 Oct 23 2015 2003.12.html
-rw-rw-r-- 1 sburns httpd 2881 Jan 16 2011 2003.1.html
-rw-rw-r-- 1 sburns httpd 3682 Jan 3 2014 2003.2.html
-rw-rw-r-- 1 sburns httpd 4637 Jun 18 2010 2003.3.html
-rw-rw-r-- 1 sburns httpd 4799 Jan 11 2011 2003.4.html
-rw-rw-r-- 1 sburns httpd 5650 Jan 11 2011 2003.5.html
-rw-rw-r-- 1 sburns httpd 6687 Jun 17 2010 2003.6.html
-rw-rw-r-- 1 sburns httpd 6417 Jun 17 2010 2003.7.html
-rw-rw-r-- 1 sburns httpd 4859 Mar 20 2006 2003.8.html
-rw-rw-r-- 1 sburns httpd 6468 Jun 17 2010 2003.9.html
-rw-rw-r-- 1 sburns httpd 2069 Dec 12 2005 2003.html

-rw-rw-r-- 1 sburns httpd 11397 Feb 3 2006 2004.10.html
-rw-rw-r-- 1 beaurejm httpd 6631 Feb 6 2007 2004.11.html
-rw-rw-r-- 1 sburns httpd 4890 Dec 29 2004 2004.12.html
-rw-rw-r-- 1 sburns httpd 4449 May 25 2005 2004.1.html
-rw-rw-r-- 1 sburns httpd 4844 Mar 4 2004 2004.2.html
-rw-rw-r-- 1 sburns httpd 5587 May 25 2005 2004.3.html
-rw-rw-r-- 1 sburns httpd 6016 Jun 5 2005 2004.4.html
-rw-rw-r-- 1 sburns httpd 7616 May 25 2005 2004.5.html
-rw-rw-r-- 1 sburns httpd 6535 May 25 2005 2004.6.html
-rw-rw-r-- 1 sburns httpd 7638 Aug 23 2006 2004.7.html
-rw-rw-r-- 1 sburns httpd 7153 Aug 23 2006 2004.8.html
-rw-rw-r-- 1 sburns httpd 5361 Jan 10 2011 2004.9.html
-rw-rw-r-- 1 sburns httpd 2069 Dec 12 2005 2004.html
-rw-rw-r-- 1 sburns httpd 799 Feb 23 2005 2004_old.html

-rw-rw-r-- 1 sburns httpd 11218 Nov 8 2005 2005.10.html
-rw-rw-r-- 1 sburns httpd 6043 Jan 5 2006 2005.11.html
-rw-rw-r-- 1 sburns httpd 5291 Jan 1 2006 2005.12.html
-rw-rw-r-- 1 sburns httpd 6242 Apr 29 2006 2005.1.html
-rw-rw-r-- 1 sburns httpd 6641 May 25 2005 2005.2.html
-rw-rw-r-- 1 sburns httpd 6798 Aug 31 2005 2005.3.html
-rw-rw-r-- 1 sburns httpd 5762 Aug 31 2005 2005.4.html
-rw-rw-r-- 1 sburns httpd 8239 Jun 20 2005 2005.5.html
-rw-rw-r-- 1 sburns httpd 8197 Jul 6 2005 2005.6.html
-rw-rw-r-- 1 sburns httpd 8620 Aug 10 2005 2005.7.html
-rw-rw-r-- 1 sburns httpd 7605 Jan 9 2008 2005.8.html
-rw-rw-r-- 1 sburns httpd 9087 Jan 10 2006 2005.9.html
-rw-rw-r-- 1 sburns httpd 2069 Nov 29 2005 2005.html

```

|            |   |          |       |       |     |    |       |                |
|------------|---|----------|-------|-------|-----|----|-------|----------------|
| -rw-rw-r-- | 1 | sburns   | httpd | 1579  | May | 17 | 2005  | 2005_orig.html |
|            |   |          |       |       |     |    |       |                |
| -rw-rw-r-- | 1 | sburns   | httpd | 8371  | Nov | 3  | 2006  | 2006.10.html   |
| -rw-rw-r-- | 1 | sburns   | httpd | 5470  | Nov | 30 | 2006  | 2006.11.html   |
| -rw-rw-r-- | 1 | beaurejm | httpd | 5789  | Jan | 31 | 2007  | 2006.12.html   |
| -rw-rw-r-- | 1 | sburns   | httpd | 6111  | Sep | 7  | 2006  | 2006.1.html    |
| -rw-rw-r-- | 1 | sburns   | httpd | 5117  | Sep | 7  | 2006  | 2006.2.html    |
| -rw-rw-r-- | 1 | sburns   | httpd | 5729  | Sep | 7  | 2006  | 2006.3.html    |
| -rw-rw-r-- | 1 | sburns   | httpd | 8385  | Jan | 21 | 2008  | 2006.4.html    |
| -rw-rw-r-- | 1 | sburns   | httpd | 8213  | Sep | 7  | 2006  | 2006.5.html    |
| -rw-rw-r-- | 1 | sburns   | httpd | 6092  | Feb | 26 | 2007  | 2006.6.html    |
| -rw-rw-r-- | 1 | sburns   | httpd | 10806 | Sep | 7  | 2006  | 2006.7.html    |
| -rw-rw-r-- | 1 | sburns   | httpd | 8218  | Sep | 7  | 2006  | 2006.8.html    |
| -rw-rw-r-- | 1 | sburns   | httpd | 9481  | Jan | 12 | 2007  | 2006.9.html    |
| -rw-rw-r-- | 1 | sburns   | httpd | 2069  | May | 6  | 2006  | 2006.html      |
|            |   |          |       |       |     |    |       |                |
| -rw-rw-r-- | 1 | sburns   | httpd | 9862  | Nov | 13 | 2007  | 2007.10.html   |
| -rw-rw-r-- | 1 | sburns   | httpd | 8458  | Dec | 10 | 2007  | 2007.11.html   |
| -rw-rw-r-- | 1 | sburns   | httpd | 8952  | Jan | 6  | 2008  | 2007.12.html   |
| -rw-rw-r-- | 1 | sburns   | httpd | 5117  | Feb | 6  | 2007  | 2007.1.html    |
| -rw-rw-r-- | 1 | sburns   | httpd | 5256  | Mar | 6  | 2007  | 2007.2.html    |
| -rw-rw-r-- | 1 | sburns   | httpd | 5669  | Apr | 2  | 2007  | 2007.3.html    |
| -rw-rw-r-- | 1 | sburns   | httpd | 9157  | Feb | 18 | 11:04 | 2007.4.html    |
| -rw-rw-r-- | 1 | sburns   | httpd | 9348  | Dec | 11 | 2007  | 2007.5.html    |
| -rw-rw-r-- | 1 | sburns   | httpd | 9312  | Oct | 14 | 2007  | 2007.6.html    |
| -rw-rw-r-- | 1 | sburns   | httpd | 10220 | Nov | 23 | 2007  | 2007.7.html    |
| -rw-rw-r-- | 1 | beaurejm | httpd | 9364  | Feb | 28 | 2008  | 2007.8.html    |
| -rw-rw-r-- | 1 | sburns   | httpd | 11055 | Feb | 27 | 2008  | 2007.9.html    |
| -rw-rw-r-- | 1 | sburns   | httpd | 2069  | Jul | 2  | 2009  | 2007.html      |
|            |   |          |       |       |     |    |       |                |
| -rw-rw-r-- | 1 | beaurejm | httpd | 9904  | Nov | 4  | 2008  | 2008.10.html   |
| -rw-rw-r-- | 1 | sburns   | httpd | 7012  | Oct | 6  | 2010  | 2008.11.html   |
| -rw-rw-r-- | 1 | sburns   | httpd | 4394  | Jan | 6  | 2009  | 2008.12.html   |
| -rw-rw-r-- | 1 | sburns   | httpd | 8141  | Mar | 16 | 2008  | 2008.1.html    |
| -rw-rw-r-- | 1 | sburns   | httpd | 7339  | Apr | 2  | 2008  | 2008.2.html    |
| -rw-rw-r-- | 1 | beaurejm | httpd | 6660  | Apr | 3  | 2008  | 2008.3.html    |
| -rw-rw-r-- | 1 | sburns   | httpd | 5062  | May | 9  | 2008  | 2008.4.html    |
| -rw-rw-r-- | 1 | beaurejm | httpd | 7071  | Jun | 9  | 2008  | 2008.5.html    |
| -rw-rw-r-- | 1 | sburns   | httpd | 8290  | Jul | 8  | 2008  | 2008.6.html    |
| -rw-rw-r-- | 1 | sburns   | httpd | 9470  | Aug | 1  | 2008  | 2008.7.html    |
| -rw-rw-r-- | 1 | beaurejm | httpd | 8814  | Oct | 13 | 2008  | 2008.8.html    |
| -rw-rw-r-- | 1 | sburns   | httpd | 7242  | Oct | 25 | 2010  | 2008.9.html    |
| -rw-rw-r-- | 1 | sburns   | httpd | 2069  | Jul | 2  | 2009  | 2008.html      |
|            |   |          |       |       |     |    |       |                |
| -rw-rw-r-- | 1 | sburns   | httpd | 7066  | Nov | 2  | 2009  | 2009.10.html   |
| -rw-rw-r-- | 1 | sburns   | httpd | 5979  | Nov | 30 | 2009  | 2009.11.html   |
| -rw-rw-r-- | 1 | sburns   | httpd | 5756  | Dec | 21 | 2009  | 2009.12.html   |
| -rw-rw-r-- | 1 | sburns   | httpd | 5092  | Feb | 2  | 2009  | 2009.1.html    |

|            |   |        |       |      |     |    |       |              |
|------------|---|--------|-------|------|-----|----|-------|--------------|
| -rw-rw-r-- | 1 | sburns | httpd | 3244 | Feb | 17 | 2009  | 2009.2.html  |
| -rw-rw-r-- | 1 | sburns | httpd | 5286 | Apr | 1  | 2009  | 2009.3.html  |
| -rw-rw-r-- | 1 | sburns | httpd | 6035 | May | 3  | 2009  | 2009.4.html  |
| -rw-rw-r-- | 1 | sburns | httpd | 8101 | Jun | 7  | 2009  | 2009.5.html  |
| -rw-rw-r-- | 1 | sburns | httpd | 8217 | Sep | 23 | 2009  | 2009.6.html  |
| -rw-rw-r-- | 1 | sburns | httpd | 9285 | Aug | 31 | 2009  | 2009.7.html  |
| -rw-rw-r-- | 1 | sburns | httpd | 7566 | May | 23 | 2014  | 2009.8.html  |
| -rw-rw-r-- | 1 | sburns | httpd | 7623 | Oct | 19 | 2009  | 2009.9.html  |
| -rw-rw-r-- | 1 | sburns | httpd | 2069 | Sep | 22 | 2014  | 2009.html    |
|            |   |        |       |      |     |    |       |              |
| -rw-rw-r-- | 1 | sburns | httpd | 3178 | Jan | 14 | 2005  | 200x.10.html |
| -rw-rw-r-- | 1 | sburns | httpd | 2743 | Jan | 14 | 2005  | 200x.11.html |
| -rw-rw-r-- | 1 | sburns | httpd | 2831 | Jan | 14 | 2005  | 200x.12.html |
| -rw-rw-r-- | 1 | sburns | httpd | 2653 | Nov | 29 | 2005  | 200x.1.html  |
| -rw-rw-r-- | 1 | sburns | httpd | 2996 | Jan | 14 | 2005  | 200x.2.html  |
| -rw-rw-r-- | 1 | sburns | httpd | 2687 | Jan | 14 | 2005  | 200x.3.html  |
| -rw-rw-r-- | 1 | sburns | httpd | 2681 | Jan | 14 | 2005  | 200x.4.html  |
| -rw-rw-r-- | 1 | sburns | httpd | 2753 | Jan | 14 | 2005  | 200x.5.html  |
| -rw-rw-r-- | 1 | sburns | httpd | 2793 | Jan | 14 | 2005  | 200x.6.html  |
| -rw-rw-r-- | 1 | sburns | httpd | 3127 | Jan | 14 | 2005  | 200x.7.html  |
| -rw-rw-r-- | 1 | sburns | httpd | 2695 | Jan | 14 | 2005  | 200x.8.html  |
| -rw-rw-r-- | 1 | sburns | httpd | 2741 | Jan | 14 | 2005  | 200x.9.html  |
|            |   |        |       |      |     |    |       |              |
| -rw-rw-r-- | 1 | sburns | httpd | 7196 | Oct | 29 | 2012  | 2010.10.html |
| -rw-rw-r-- | 1 | sburns | httpd | 5422 | Dec | 3  | 2010  | 2010.11.html |
| -rw-rw-r-- | 1 | sburns | httpd | 5868 | Jan | 7  | 2011  | 2010.12.html |
| -rw-rw-r-- | 1 | sburns | httpd | 5145 | Jan | 27 | 2010  | 2010.1.html  |
| -rw-rw-r-- | 1 | sburns | httpd | 4268 | Mar | 12 | 2010  | 2010.2.html  |
| -rw-rw-r-- | 1 | sburns | httpd | 5059 | Apr | 1  | 2010  | 2010.3.html  |
| -rw-rw-r-- | 1 | sburns | httpd | 5338 | Apr | 29 | 2010  | 2010.4.html  |
| -rw-rw-r-- | 1 | sburns | httpd | 7318 | Jun | 8  | 2010  | 2010.5.html  |
| -rw-rw-r-- | 1 | sburns | httpd | 5543 | Jul | 24 | 2010  | 2010.6.html  |
| -rw-rw-r-- | 1 | sburns | httpd | 6716 | Jul | 28 | 2010  | 2010.7.html  |
| -rw-rw-r-- | 1 | sburns | httpd | 4360 | Sep | 1  | 2010  | 2010.8.html  |
| -rw-rw-r-- | 1 | sburns | httpd | 8128 | Oct | 12 | 2010  | 2010.9.html  |
| -rw-rw-r-- | 1 | sburns | httpd | 2069 | Sep | 22 | 2014  | 2010.html    |
|            |   |        |       |      |     |    |       |              |
| -rw-rw-r-- | 1 | sburns | httpd | 8610 | May | 31 | 15:58 | 2011.10.html |
| -rw-rw-r-- | 1 | sburns | httpd | 5731 | May | 31 | 16:00 | 2011.11.html |
| -rw-rw-r-- | 1 | sburns | httpd | 4502 | Jan | 18 | 2012  | 2011.12.html |
| -rw-rw-r-- | 1 | sburns | httpd | 6419 | Feb | 4  | 2011  | 2011.1.html  |
| -rw-rw-r-- | 1 | sburns | httpd | 5306 | Mar | 3  | 2011  | 2011.2.html  |
| -rw-rw-r-- | 1 | sburns | httpd | 4682 | Mar | 31 | 2011  | 2011.3.html  |
| -rw-rw-r-- | 1 | sburns | httpd | 4626 | Apr | 21 | 2011  | 2011.4.html  |
| -rw-rw-r-- | 1 | sburns | httpd | 5162 | Jun | 5  | 2011  | 2011.5.html  |
| -rw-rw-r-- | 1 | sburns | httpd | 5566 | Jun | 28 | 2011  | 2011.6.html  |
| -rw-rw-r-- | 1 | sburns | httpd | 7709 | Aug | 22 | 2011  | 2011.7.html  |
| -rw-rw-r-- | 1 | sburns | httpd | 4734 | Sep | 5  | 2011  | 2011.8.html  |

|            |   |        |       |      |     |    |       |              |
|------------|---|--------|-------|------|-----|----|-------|--------------|
| -rw-rw-r-- | 1 | sburns | httpd | 5584 | Oct | 3  | 2011  | 2011.9.html  |
| -rw-rw-r-- | 1 | sburns | httpd | 2069 | Sep | 22 | 2014  | 2011.html    |
|            |   |        |       |      |     |    |       |              |
| -rw-rw-r-- | 1 | sburns | httpd | 5840 | Nov | 5  | 2012  | 2012.10.html |
| -rw-rw-r-- | 1 | sburns | httpd | 5898 | Dec | 6  | 2012  | 2012.11.html |
| -rw-rw-r-- | 1 | sburns | httpd | 7499 | Feb | 28 | 2013  | 2012.12.html |
| -rw-rw-r-- | 1 | sburns | httpd | 4471 | Feb | 5  | 2012  | 2012.1.html  |
| -rw-rw-r-- | 1 | sburns | httpd | 4141 | Feb | 14 | 2012  | 2012.2.html  |
| -rw-rw-r-- | 1 | sburns | httpd | 4519 | Mar | 30 | 2012  | 2012.3.html  |
| -rw-rw-r-- | 1 | sburns | httpd | 4206 | Apr | 26 | 2012  | 2012.4.html  |
| -rw-rw-r-- | 1 | sburns | httpd | 3707 | May | 25 | 2012  | 2012.5.html  |
| -rw-rw-r-- | 1 | sburns | httpd | 4532 | Jul | 1  | 2012  | 2012.6.html  |
| -rw-rw-r-- | 1 | sburns | httpd | 7253 | Sep | 7  | 2012  | 2012.7.html  |
| -rw-rw-r-- | 1 | sburns | httpd | 6864 | Aug | 31 | 2012  | 2012.8.html  |
| -rw-rw-r-- | 1 | sburns | httpd | 6747 | Oct | 11 | 2012  | 2012.9.html  |
| -rw-rw-r-- | 1 | sburns | httpd | 2069 | Sep | 22 | 2014  | 2012.html    |
|            |   |        |       |      |     |    |       |              |
| -rw-rw-r-- | 1 | sburns | httpd | 7270 | Feb | 24 | 2014  | 2013.10.html |
| -rw-rw-r-- | 1 | sburns | httpd | 7415 | Nov | 30 | 2013  | 2013.11.html |
| -rw-rw-r-- | 1 | sburns | httpd | 4826 | Feb | 7  | 2014  | 2013.12.html |
| -rw-rw-r-- | 1 | sburns | httpd | 4255 | Jan | 24 | 2013  | 2013.1.html  |
| -rw-rw-r-- | 1 | sburns | httpd | 4559 | Mar | 6  | 2014  | 2013.2.html  |
| -rw-rw-r-- | 1 | sburns | httpd | 4852 | Apr | 2  | 2013  | 2013.3.html  |
| -rw-rw-r-- | 1 | sburns | httpd | 4473 | May | 3  | 2013  | 2013.4.html  |
| -rw-rw-r-- | 1 | sburns | httpd | 5201 | May | 30 | 2013  | 2013.5.html  |
| -rw-rw-r-- | 1 | sburns | httpd | 6776 | Nov | 28 | 2014  | 2013.6.html  |
| -rw-rw-r-- | 1 | sburns | httpd | 8152 | May | 6  | 2015  | 2013.7.html  |
| -rw-rw-r-- | 1 | sburns | httpd | 4669 | Aug | 28 | 2013  | 2013.8.html  |
| -rw-rw-r-- | 1 | sburns | httpd | 7590 | Oct | 10 | 2013  | 2013.9.html  |
| -rw-rw-r-- | 1 | sburns | httpd | 2069 | Sep | 22 | 2014  | 2013.html    |
|            |   |        |       |      |     |    |       |              |
| -rw-rw-r-- | 1 | sburns | httpd | 9815 | Jan | 7  | 10:17 | 2014.10.html |
| -rw-rw-r-- | 1 | sburns | httpd | 7327 | Dec | 10 | 16:40 | 2014.11.html |
| -rw-rw-r-- | 1 | sburns | httpd | 5784 | Feb | 8  | 12:42 | 2014.12.html |
| -rw-rw-r-- | 1 | sburns | httpd | 6062 | Feb | 13 | 2014  | 2014.1.html  |
| -rw-rw-r-- | 1 | sburns | httpd | 6395 | Mar | 6  | 2014  | 2014.2.html  |
| -rw-rw-r-- | 1 | sburns | httpd | 5733 | Apr | 9  | 2014  | 2014.3.html  |
| -rw-rw-r-- | 1 | sburns | httpd | 5874 | Sep | 5  | 2014  | 2014.4.html  |
| -rw-rw-r-- | 1 | sburns | httpd | 5594 | Sep | 5  | 2014  | 2014.5.html  |
| -rw-rw-r-- | 1 | sburns | httpd | 8142 | Jul | 4  | 2014  | 2014.6.html  |
| -rw-rw-r-- | 1 | sburns | httpd | 8815 | Aug | 4  | 2014  | 2014.7.html  |
| -rw-rw-r-- | 1 | sburns | httpd | 9688 | Oct | 29 | 2015  | 2014.8.html  |
| -rw-rw-r-- | 1 | sburns | httpd | 8520 | Oct | 10 | 2014  | 2014.9.html  |
| -rw-rw-r-- | 1 | sburns | httpd | 2081 | Sep | 22 | 2014  | 2014.html    |
|            |   |        |       |      |     |    |       |              |
| -rw-rw-r-- | 1 | sburns | httpd | 7061 | Nov | 5  | 2015  | 2015.10.html |
| -rw-rw-r-- | 1 | sburns | httpd | 6755 | Dec | 16 | 13:08 | 2015.11.html |
| -rw-rw-r-- | 1 | sburns | httpd | 5341 | Dec | 19 | 00:09 | 2015.12.html |

```

-rw-rw-r-- 1 sburns      httpd    5370 May 20   2015 2015.1.html
-rw-rw-r-- 1 sburns      httpd    5129 May 20   2015 2015.2.html
-rw-rw-r-- 1 sburns      httpd    4463 Jan  7 10:18 2015.3.html
-rw-rw-r-- 1 sburns      httpd    5997 Jun 15   2015 2015.4.html
-rw-rw-r-- 1 sburns      httpd    6738 Jun 15   2015 2015.5.html
-rw-rw-r-- 1 sburns      httpd    6406 Nov 12 12:56 2015.6.html
-rw-rw-r-- 1 sburns      httpd    6733 Nov 12 12:57 2015.7.html
-rw-rw-r-- 1 sburns      httpd    9908 Sep  8   2015 2015.8.html
-rw-rw-r-- 1 sburns      httpd    6456 Oct 19   2015 2015.9.html
-rw-rw-r-- 1 sburns      httpd    2081 Nov 10   2015 2015.html

-rw-rw-r-- 1 sburns      httpd    3277 Aug 31 23:49 2016.10.html
-rw-rw-r-- 1 sburns      httpd    2842 Aug 31 23:51 2016.11.html
-rw-rw-r-- 1 sburns      httpd    2848 Aug 31 23:51 2016.12.html
-rw-rw-r-- 1 sburns      httpd    4951 Jun 17 12:20 2016.1.html
-rw-rw-r-- 1 sburns      httpd    3949 Mar 11 23:21 2016.2.html
-rw-rw-r-- 1 sburns      httpd    4478 Apr  1 22:32 2016.3.html
-rw-rw-r-- 1 sburns      httpd    4516 Jun  3 14:53 2016.4.html
-rw-rw-r-- 1 sburns      httpd    5417 Jun  4 10:27 2016.5.html
-rw-rw-r-- 1 sburns      httpd    5173 Jul 11 15:39 2016.6.html
-rw-rw-r-- 1 sburns      httpd    6047 Aug 22 09:51 2016.7.html
-rw-rw-r-- 1 sburns      httpd    4742 Sep  7 12:37 2016.8.html
-rw-rw-r-- 1 sburns      httpd    3733 Sep  6 14:00 2016.9.html

-rw-rw-r-- 1 sburns      httpd    6062 Feb 13   2014 2020.1.html

-rw-rw-r-- 1 sburns      httpd    2694 Mar 23   2014 2025.10.html
-rw-rw-r-- 1 sburns      httpd    3140 Mar 23   2014 2025.11.html
-rw-rw-r-- 1 sburns      httpd    2682 Mar 23   2014 2025.12.html
-rw-rw-r-- 1 sburns      httpd    6062 Mar 23   2014 2025.1.html
-rw-rw-r-- 1 sburns      httpd    2741 Jan  3   2014 2025.5.html
-rw-rw-r-- 1 sburns      httpd    2787 Mar 23   2014 2025.6.html
-rw-rw-r-- 1 sburns      httpd    2715 Mar 23   2014 2025.7.html
-rw-rw-r-- 1 sburns      httpd    2692 Mar 23   2014 2025.8.html
-rw-rw-r-- 1 sburns      httpd    2724 Mar 23   2014 2025.9.html

lrwxrwxrwx 1 sburns      httpd          11 Apr  4 15:07 index.html -> 2016.9.html

```
