# Supplementary material for: The Niwot Ridge Subalpine Forest US-NR1 AmeriFlux site – Part 1: Data acquisition and site record-keeping
Source: Copernicus journal article supplement (doi:10.5194/gi-5-451-2016), 2016-09-29
Supplement: Supplementary file 2 [file gi-5-451-2016-supplement.zip]

# INDEX

6/5/98-

BEGINNING TO DECIDE HOW TO ORGANIZE NUCLEAR RIDGE  
DATA COLLECTION.

BASIC DIAGRAM

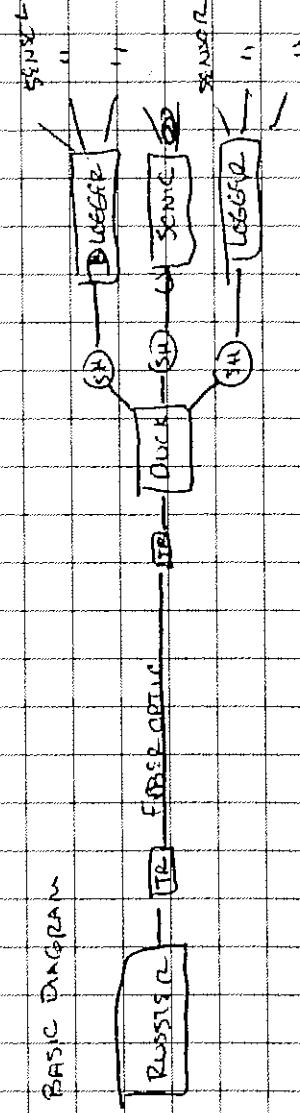

DUCK = 16 SERIAL CHANNELS  
15 ANALOG CHANNELS

CAMPBELL: 3 21x

2 23x

1 TC MULTIMETER

1 ANALOG MUX

25 TC Meters

~~21x~~ 21x

21x

8

12

4

2

4

8

N/A

1

1

DDE CHANNELS

EXC. CHANNELS

EAD CHANNELS

PULSE COUNTS

CONTROL I/O

SDM

112V

15V

TRY TO ORGANIZE BASED ON

- 1 SIMPLIFY PROGRAMMING - NO DATA LOGGER DOES MORE THAN 1 COMPLICATED FUNCTION (RUN THE TC MUX, etc.)
- 2 POSITION ON TOWER - PROXIMITY TO SENSORS
- 3 SENSITIVE SENSITIVITY (NOT CRITICAL) - i.e. "LIGHT" SENSORS
- 4 ADVANCE OF USING DUCK ANALOG CHANNELS

# INDEX

$\Delta \leftarrow \text{CO}_2 \text{ PREFLUE}$   
INJECTS

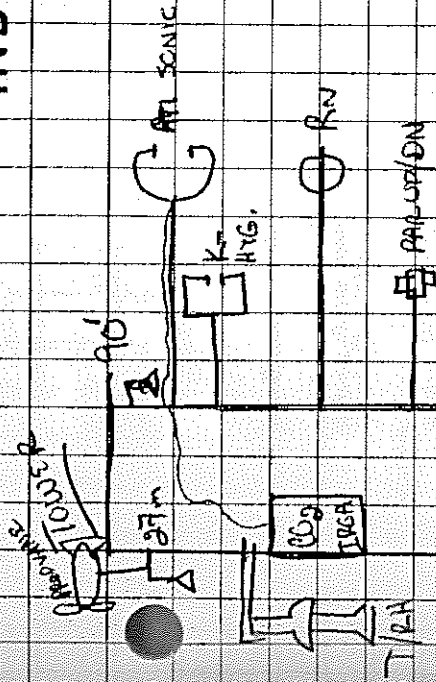

SCANDY HEIGHT

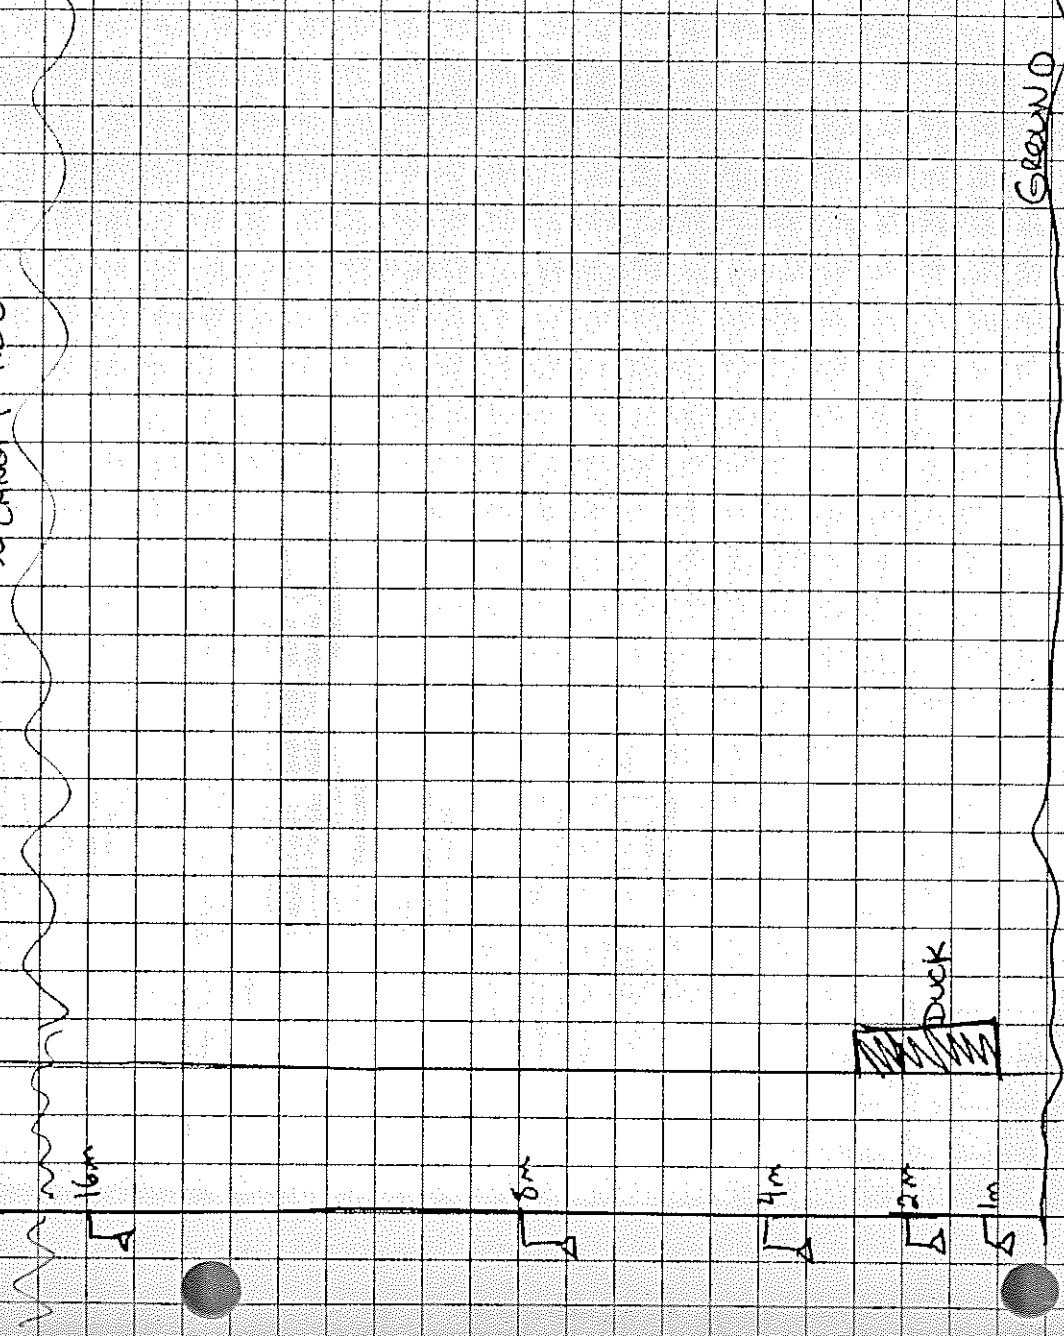

# INDEX

2 FIRST ATTEMPT

## CUFF Data System Breakdown:

Main Data Collector : the DCU ("the DUCK")  
15 Analog Channel inputs  
16 Serial Channel inputs

Serial Channel #1 :  
ATI Sonic Anemometer

Serial Channel #2 :  
Campbell 23x - "Fast Data"  
Located at the top of the tower.

Inputs:

Channel 1 : Licor CO2  
Channel 2 : Licor Temp.  
Channel 3 : Licor Press.  
Channel 4 : Licor H2O  
Channel 5 : Kt H2O → Kt Hygrometer  
Channel 6 : EC total flow  
Channel 7 : EC CO2 flow

Channel 8 - 10 : REA flows and status → only used when REA is operating  
Channel 11 : Fast O3 (Delany ?)  
Channel 12 : Rnet at top of tower (RAS)  
Campbell Sonic anemometer

0 channels left  
2 controls left (with sonic running)  
4 control I/O left  
All excite and pulse channels left

Serial Channel #3 :

Campbell 21x - "Temperature"  
Located near bottom of tower

Inputs :

Channels 1 and 2 : Vaisala Temp. sensor  
Channels 3 and 4 : Vaisala Temp. Sensor  
Channels 5 and 6 : Vaisala Temp. Sensor  
Channels 7 : Tc multiplexer → 25 thermocouples → could be anywhere  
Pulse 1 : Rain Gauge

1 channel left  
0 Exc. channels left  
4 control I/O left  
3 pulse inputs left

Serial Channel #4

Campbell 23x - "Profiler"  
Located at bottom to middle of tower

Inputs :

Channel 1 : Licor CO2  
Channel 2 : Licor Temp.  
Channel 3 : Licor press.  
Channel 4 : Profiler status fields vs. which level will be sampling



Channel 5 : Profiler flow  
 Channel 6 : PAR up  
 Channel 7 : PAR down  
 Channel 8 : Barometer  
 Channel 9 : Vaisala Humidity sensor  
 Channel 10 : Vaisala Humidity sensor  
 Channel 11 : Vaisala Humidity sensor  
 Channel 12 : Leaf Wetness sensor (Maybe ???)

} LI600 PAR SENSORS  
 } LOGGED ON TOWER

1 single-ended channel left  
 1 control I/O left (Control channels 2-6 run the profiler)  
 All excite and pulse channels left

#### Serial Channel #5

Campbell 21x - "Soil"  
 Located at bottom of tower (in the forest??)

#### Inputs :

Channels 1 and 2 : AM416 analog multiplexer  
 10 heat flux plates (REBS)  
 Channel 3 : Soil Moisture Probe (single-ended) (REBS)  
 Channels 4 and 5 : REBS Soil Temperature Probe  
 Channels 6 and 7 : REBS Soil Temperature Probe  
 1 differential and 1 single-ended channels (add more Moisture probes ???)  
 0 Excitation channels left  
 All pulse channels left  
 5 control I/O channels left

#### Serial Channel #6

Dendrometer Output ??

#### Serial Channel #7

TECO O<sub>3</sub> measurement

#### Serial Channel #8

Fast Isoprene Sensor (??) USEFUL? MAY BE NOT!

#### Serial Channel #9

Propylene #1

#### Serial Channel #10

Propylene #2

#### Serial Channel #11

Propylene #3

\*\*\*\*\*Note - we still have all 15 analog channels open on the DUCK. I have avoided using them because we have had problems with the code that samples the analog data in the past. We have worked out most (if not all the bugs) on taking in serial data into the DUCK. Therefore, using the Campbell dataloggers to send serial data to the DUCK is the most reliable at this point. We also still have 5 serial channels to the DUCK open. I have no idea if the DUCK can actually handle 16 serial inputs without dropping samples. We have only run about 4 or 5 serial inputs into the DUCK and that seems fine.



# CUFF Data System Breakdown:

Main Data Collector : the DCU ("the DUCK")  
15 Analog Channel inputs  
16 Serial Channel inputs

Serial Channel #1 :  
ATI Sonic Anemometer

Serial Channel #2 :  
Campbell 23x - "Fast Data"  
Located at the top of the tower.  
Inputs:

- Channel 1 : Licor CO2
- Channel 2 : Licor Temp.
- Channel 3 : Licor Press.
- Channel 4 : Licor H2O
- Channel 5 : K7 H2O
- Channel 6 : EC total flow
- Channel 7 : EC CO2 flow
- Channel 8 - 10 : REA flows and status
- Channel 11 : Fast O<sub>2</sub>
- Channel 12 :  
Campbell Sonic anemometer

- 1 channels left (Channel 7 may also be open)
- 2 controls left (with sonic running)
- 4 control I/O left
- All excite and pulse channels left

Serial Channel #3 :  
Campbell 21x - "Temperature"  
Located near bottom of tower  
Inputs:

- Channels 1 and 2 : Vaisala Temp. sensor
- Channels 3 and 4 : Vaisala Temp. Sensor
- Channels 5 and 6 : Vaisala Temp. Sensor
- Channels 7 : Tc multiplexer -> 25 thermocouples
- Pulse 1 : Rain Gauge

- 1 channel left
- 0 Exc. channels left
- 4 control I/O left
- 3 pulse inputs left

new + 2

→ PROGRAM IS WRITTEN  
(RUNNING AREA)

area.csi

→ WRITTEN BUT NOT TESTED

(PROCES HAVE BEEN TESTED)  
(EVERY 5 SEC)

TABLE 1 - 60 msec EXECUTION

TABLE 2 - (EVERY 5 SEC)

EXECUTION TIME - 330 msec

\* NEED TO CHECK FOR TIMING  
INTERFERENCES + OVERLAPPING  
STORAGE INPUTS !!

#### Serial Channel #4

Campbell 21x - "Radiation" → HUMIDITY  
Located near top of tower.

##### Inputs:

- Channel 1: Rnet at top of tower
- Channel 2: PAR up
- Channel 3: PAR down
- Channel 4: Barometer
- Channel 5: Vaisala Humidity sensor
- Channel 6: Vaisala Humidity sensor
- Channel 8: Vaisala Humidity sensor
- CHANNEL 7: Rnet at bottom
- 0 differential-ended channel left
- All control, excite, and pulse channels left

LIGHT.CSI  
(SAME AS FAST.CSI.)

THIS WORKS

#### Serial Channel #5

Campbell 21x - "Profiler"  
Located at bottom to middle of tower

##### Inputs:

- Channel 1: Licor CO2
- Channel 2: Licor Temp.
- Channel 3: Licor Temp.
- Channel 4: Profiler status
- Channel 5: Profiler flow
- Channel 6: Rnet at forest floor

PROFILER.CSI

THIS WORKS - IF USE EDDY DILUTION  
SYSTEM - NEED TO CHANGE  
OF CALIBRATION PROGRAM

##### 2 channels left

- 1 control I/O left (Control channels 2-6 run the profiler)
- All excite and pulse channels left

NOTE - TRIED USING 2  
BUT PROGRAM WOULD

#### Serial Channel #6

Campbell 23x - "Soil"  
Located at bottom of tower (in the forest??)

##### Inputs:

- Channels 1 and 2: AM416 analog multiplexer
- 10 heat flux plates
- Channel 3: Soil Moisture Probe (single-ended)
- Channels 4 and 5: REBS Soil Temperature Probe
- Channels 6 and 7: REBS Soil Temperature Probe

NOT  
WRITTEN

- 1 differential and 1 single-ended channels (add more Moisture probes ???)
- 0 Excitation channels left
- All pulse channels left
- 5 control I/O channels left

#### Serial Channel #7

Dendrometer Output ??

#### Serial Channel #8

TECO O3 measurement

#### Serial Channel #9

Fast Isoprene Sensor

Serial Channel #10  
Propylene #1

Serial Channel #11  
Propylene #2

Serial Channel #12  
Propylene #3

\*\*\*\*Note - we still have all 15 analog channels open on the DUCK. I have avoided using them because we have had problems with the code that samples the analog data in the past. We have worked out most (if not all the bugs) on taking in serial data into the DUCK. Therefore, using the Campbell dataloggers to send serial data to the DUCK is the most reliable at this point. We also still have 5 serial channels to the DUCK open. I have no idea if the DUCK can actually handle 16 serial inputs without dropping samples. We have only run about 4 or 5 serial inputs into the DUCK and that seems fine.

# NEW TOWER DIAGRAM

Method

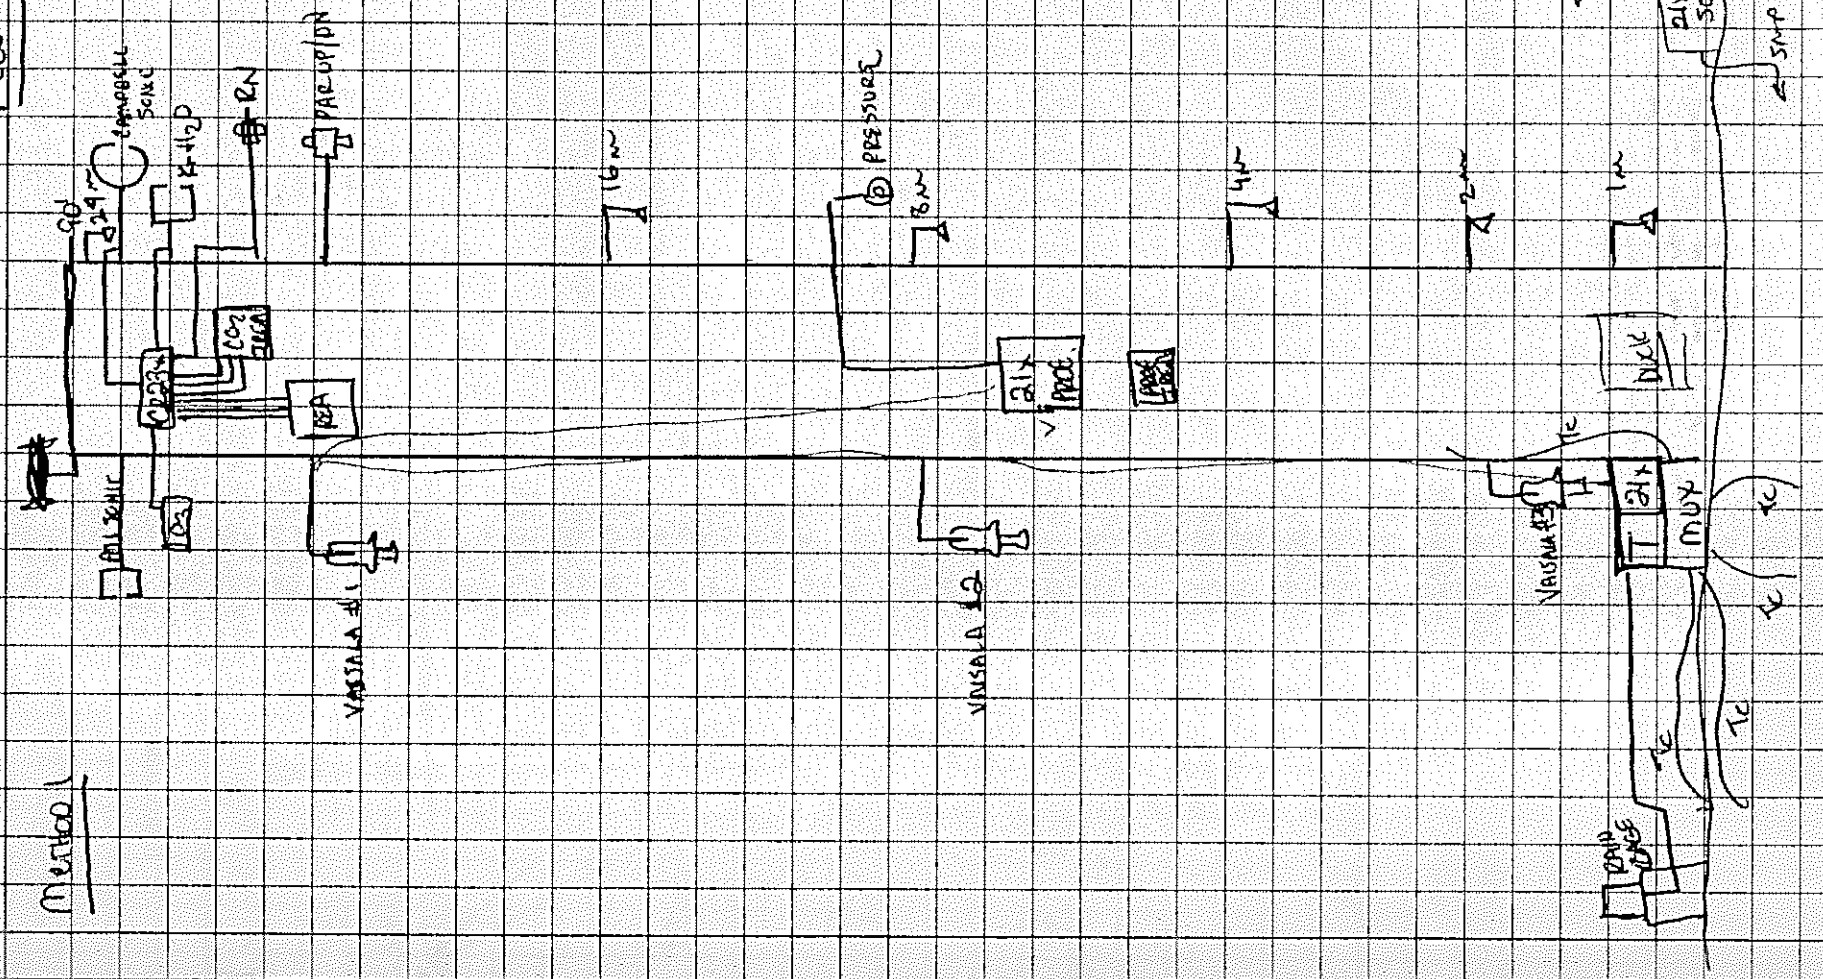



~~CHANNELS TO KEEP -~~

~~CHANNELS~~

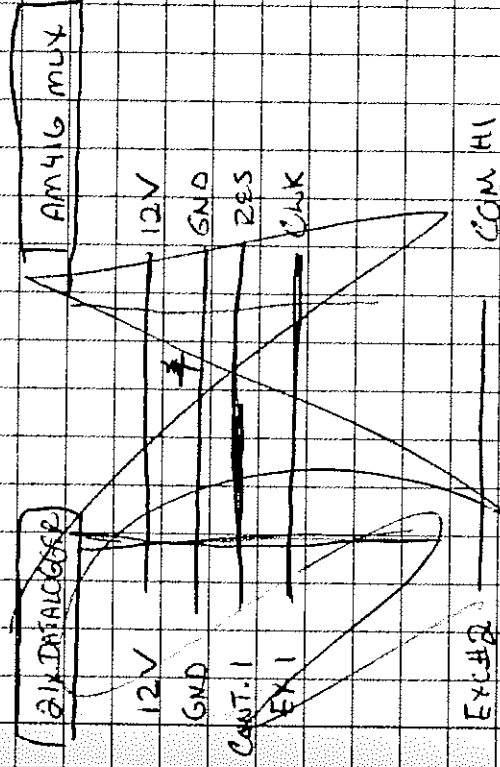

6/19/ES CALIBRATING VAISALA TEMP/HUMIDITY SENSOR  
 FOR TEMPERATURE -  
 SEE 21X MANUAL - pg. 7-5 for wiring diagram  
 & PROCEDURE FOR ICE BATH

IN ICE BATH

| SENSOR # |
|----------|
| #1       |
| #2       |
| #3       |

| RES. RATIO | Temp   | T <sub>0</sub> |
|------------|--------|----------------|
| 1.0023     | 0.58°C | 0.1°C          |
| 1.0020     | 0.51°C | 0.0°C          |
| 1.0008     | 0.19°C | 6.0°C          |

| WT MULT MULTIPLIER (PA) |
|-------------------------|
| 0.99771                 |
| 0.9980                  |
| 0.99920                 |

TEMP MULTIPLIER - IN TEMP. BATH

| TEMP.  | #1     | #2     | #3 |
|--------|--------|--------|----|
| 10.0°C | 8.61°C | 8.90°C |    |

#3

T<sub>0</sub> 8.6°C 8.90°C

6/23/98 READING TEMP. CALIBRATION IN H<sub>2</sub>O BATHCAN ONLY DO TWO AT A TIME

| BATH TEMP. | VAS. #1   | VAS. #2 | T <sub>c</sub> |
|------------|-----------|---------|----------------|
| 10.0°C     | 8.65°C    | 8.90°C  | 8.9°/8.8°C     |
| 15.0°C     | 13.8°C    | 14.08°C | 14.0°C         |
| 20.0°C     | 18.8(4)°C | 19.10°C | 19.2°C         |
| 25.0°C     | 23.90°C   | 24.21°C | 24.3°C/24.2°C  |
| 30.0°C     | 29.03°C   | 29.38°C | 29.6/7°C       |
| 36.0°C     | 35.11°C   | 35.47°C | 35.7°C         |

| BATH TEMP. | VAS. #2 | VAS. #3 | T <sub>c</sub> |
|------------|---------|---------|----------------|
| 10.0°C     | 8.95°C  | 8.71°C  | 9.2°C          |
| 15.0°C     | 13.98°C | 13.79°C | 14.2°C         |
| 20.0°C     | 19.09°C | 18.84°C | 19.2°C         |
| 25.0°C     | 24.21°C | 23.91°C | 24.2(3)        |
| 30.0°C     | 29.33°C | 29.01°C | 29.6°C         |
| 36.0°C     | 35.57°C | 35.21°C | 35.7°C         |

$$\left[ \begin{array}{l} \text{VAS \#1} \\ (y) \end{array} \text{ vs. } \begin{array}{l} \text{VAS \#2} \\ (x) \end{array} \right]$$

$$y = -0.202 + 0.9955(x)$$

$$\left[ \begin{array}{l} \text{VAS \#3} \\ (y) \end{array} \text{ vs. } \begin{array}{l} \text{VAS \#2} \\ (x) \end{array} \right]$$

$$y = -0.126 + 0.9931(x)$$

# [ WIRING DIAGRAMS for NUMOT R1006 DATA LOGGERS ]

234 -> TOP FAST DATA + REA ; PROGRAM : HREA.CSI (THIS WORKS!)

DIFF.  
INPUT CHANNELS

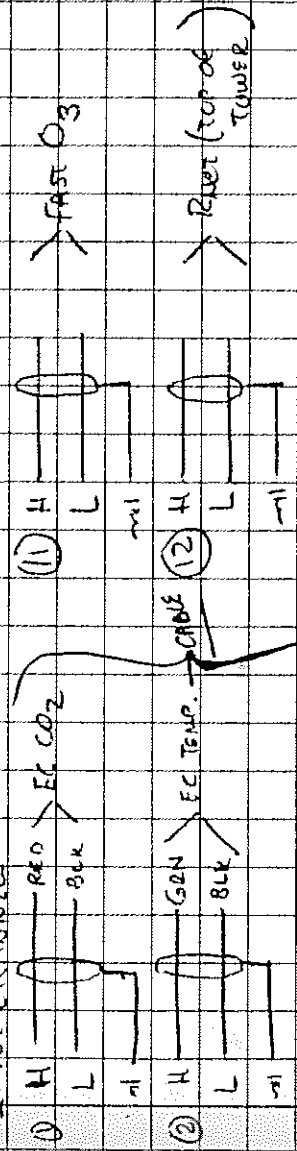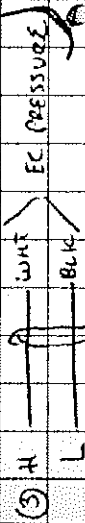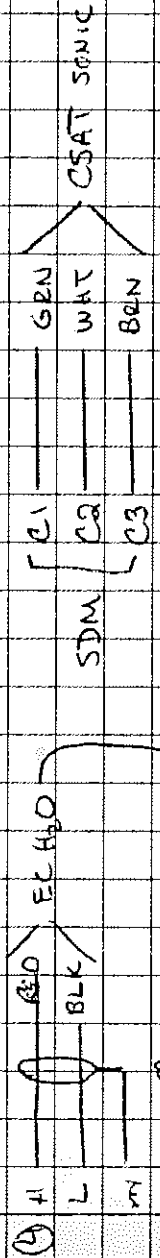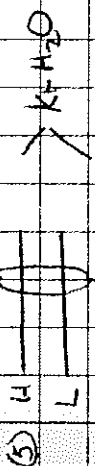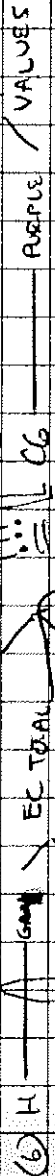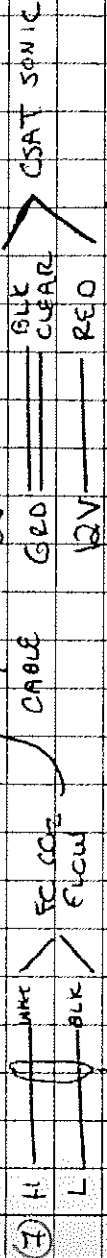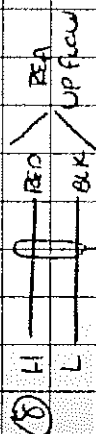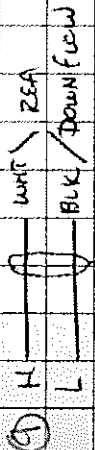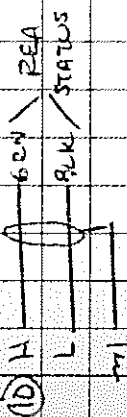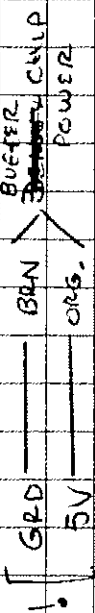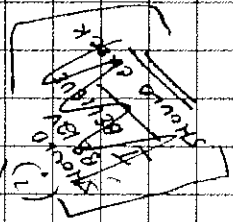



- 2k Air TEMPERATURE -  
(AT BOTTOM OF TOWER)

PROGRAM 5 Temp.v; (THIS WORKS!!)

# INPUTS

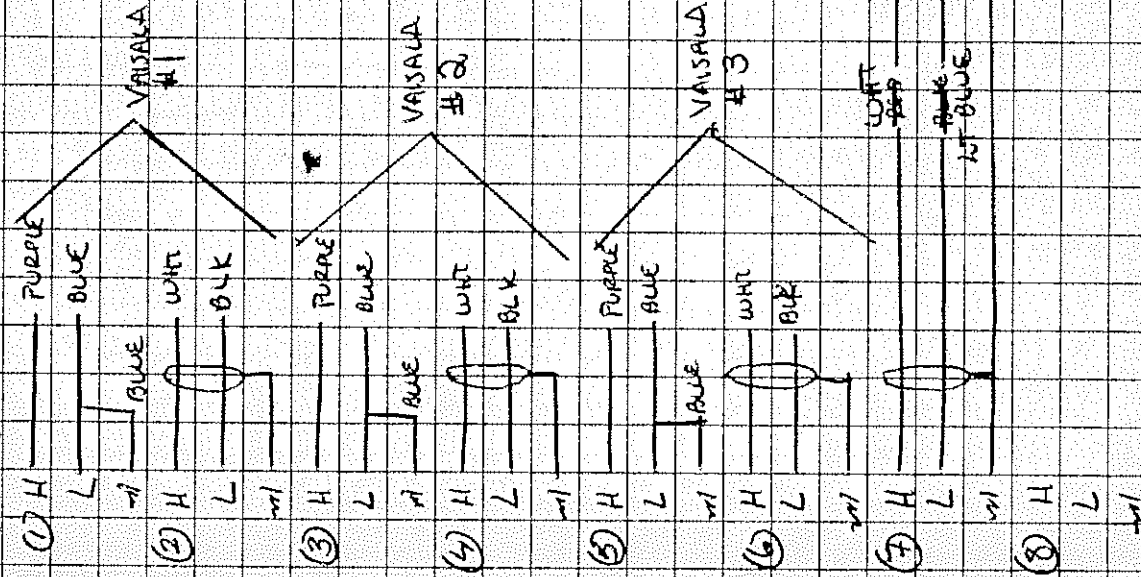

# EXCITE CHANNELS

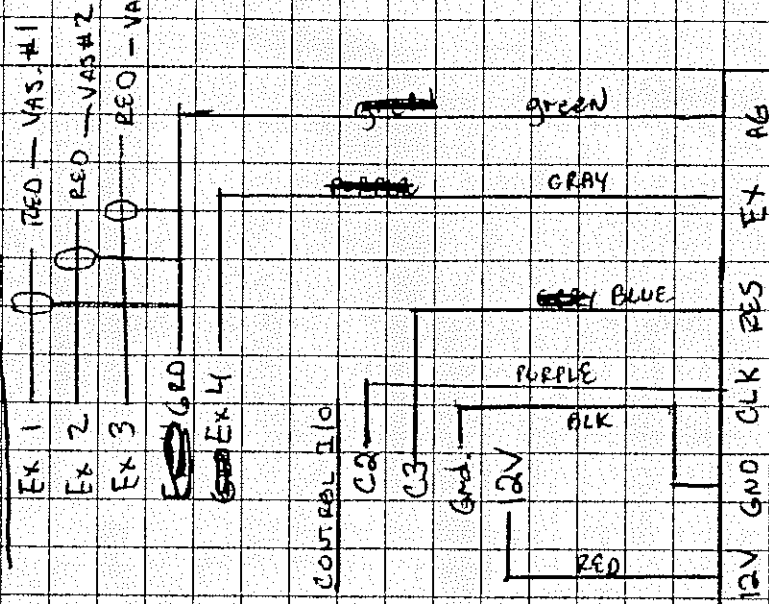

AM 25T  
HI THERMOCOUPLE  
LO  
HWT

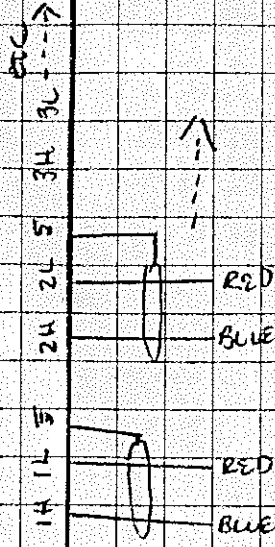

PULSE 1: BLK / Met One  
PULSE 1: CLR / RAIN  
PULSE 1: WHT / GAGE

21x - 5016

PROGRAM: 501K, CS-1

at bottom of tower

- [illegible]

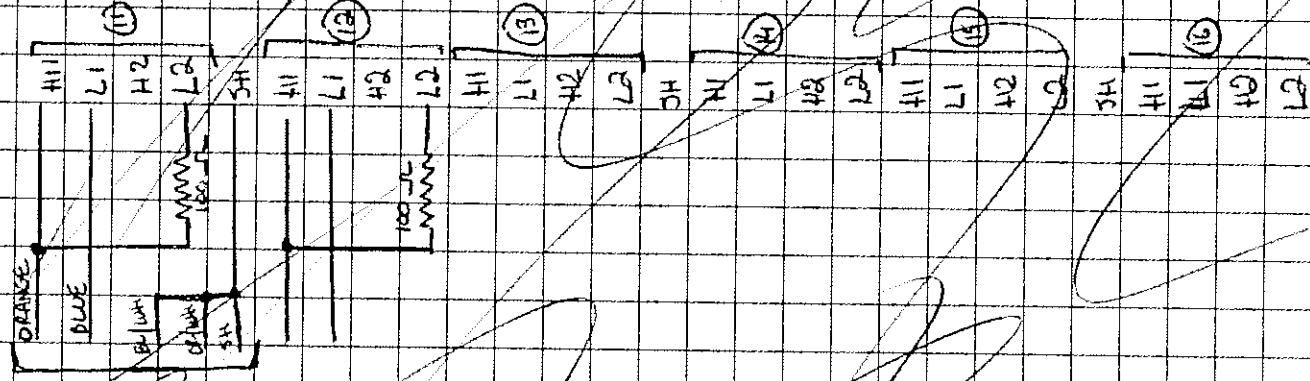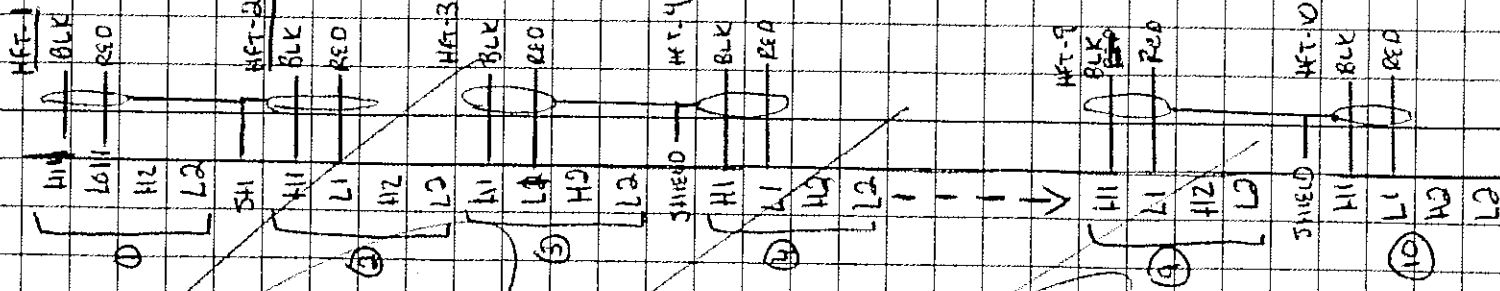

# 6/23/98 SOIL 21K DATA LOGGER (BOTTOM OF TOWER)

PROGRAM: 5012.CS (THIS WORKS!!)

## INPUTS

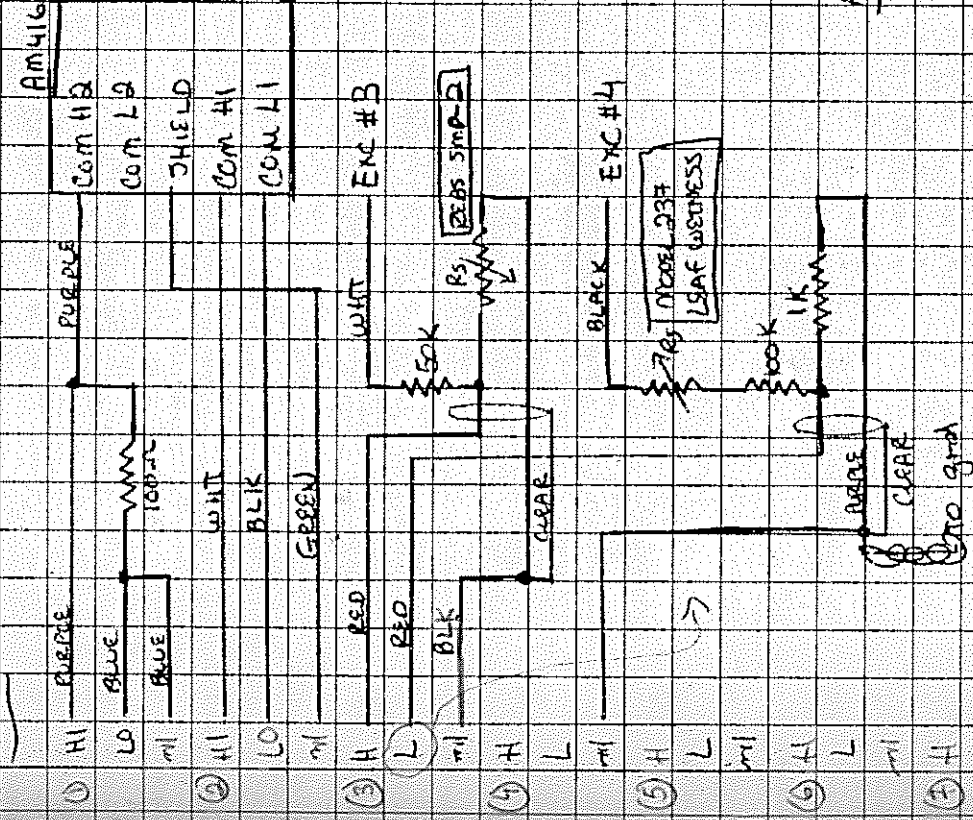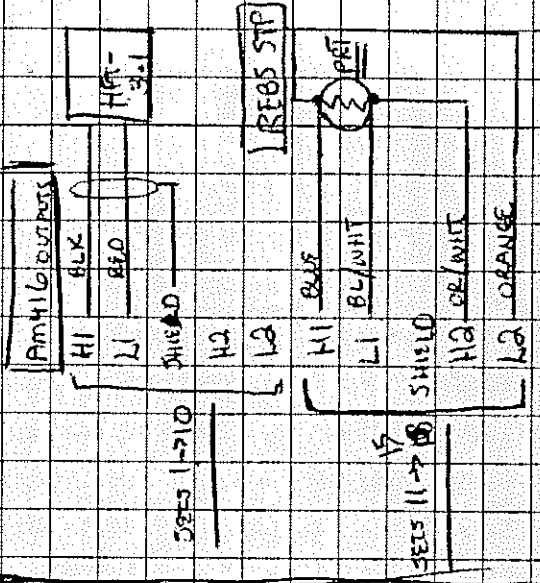

## AM416 CHANNEL

- 1 H973078
- 2 H963431
- 3 H963430
- 4 H973075
- 5 H973077
- 6 H973079
- 7 H963432
- 8 H973076
- 9 H973074
- 10 H973073
- 11 STP96019
- 12 STP96018
- 13 STP96020

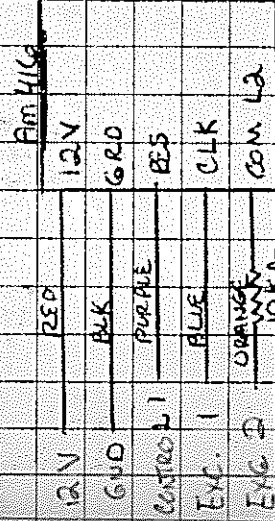

EXC 1  
EXC 2  
EXC 3  
EXC 4  
EXC 5  
EXC 6  
EXC 7  
EXC 8  
EXC 9  
EXC 10  
EXC 11  
EXC 12  
EXC 13  
EXC 14  
EXC 15  
EXC 16  
EXC 17  
EXC 18  
EXC 19  
EXC 20  
EXC 21  
EXC 22  
EXC 23  
EXC 24  
EXC 25  
EXC 26  
EXC 27  
EXC 28  
EXC 29  
EXC 30  
EXC 31  
EXC 32  
EXC 33  
EXC 34  
EXC 35  
EXC 36  
EXC 37  
EXC 38  
EXC 39  
EXC 40  
EXC 41  
EXC 42  
EXC 43  
EXC 44  
EXC 45  
EXC 46  
EXC 47  
EXC 48  
EXC 49  
EXC 50  
EXC 51  
EXC 52  
EXC 53  
EXC 54  
EXC 55  
EXC 56  
EXC 57  
EXC 58  
EXC 59  
EXC 60  
EXC 61  
EXC 62  
EXC 63  
EXC 64  
EXC 65  
EXC 66  
EXC 67  
EXC 68  
EXC 69  
EXC 70  
EXC 71  
EXC 72  
EXC 73  
EXC 74  
EXC 75  
EXC 76  
EXC 77  
EXC 78  
EXC 79  
EXC 80  
EXC 81  
EXC 82  
EXC 83  
EXC 84  
EXC 85  
EXC 86  
EXC 87  
EXC 88  
EXC 89  
EXC 90  
EXC 91  
EXC 92  
EXC 93  
EXC 94  
EXC 95  
EXC 96  
EXC 97  
EXC 98  
EXC 99  
EXC 100





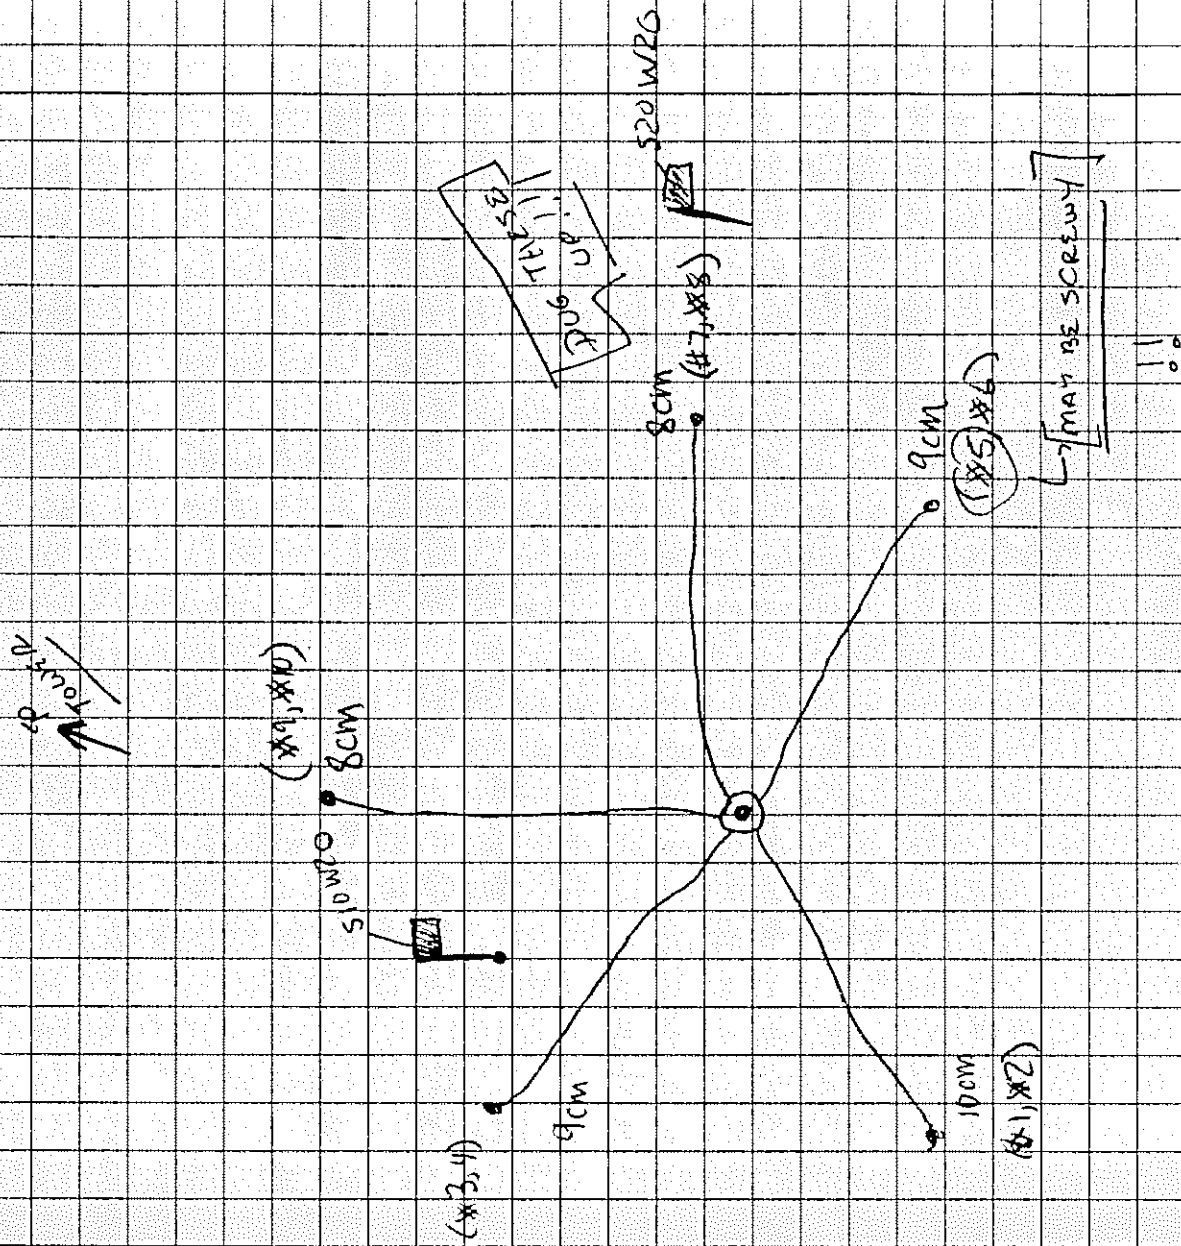

10/12/98 STARTING TO SET INSTRUMENTS ON MOUNT RIDGE TOWER

ON FRIDAY, 10/9  $\Rightarrow$  TURNED ON CAMPBELL SONIC & K HYGROMETER  
AT GRASS LEVEL & RAN OVER THE WETLAND  
 $\hookrightarrow$  (1.5 meters).

STARTED RUNNING AT 4:00 PM 10/9/98

TURNED OFF AT 11:20 AM 10/12/98

10/13/98

2:30 PM - TURNED ON BOTH SONIC & K HYGROMETER

LEVEL 12  $\Rightarrow$  70 FT HEIGHT  $\Rightarrow$  CAMPBELL

LEVEL 10  $\Rightarrow$  23X DATA LOGGER  $\Rightarrow$  SONIC & K

CO<sub>2</sub> - SENSOR

10/10/98 3:21 PM - CO<sub>2</sub> ENTRY SYSTEM RUNNING

ZEROED & SPANNED !!

USING 6262; SERIAL # IR362 (I BELIEVE)

FLOW RATE CONVERSIONS

TURBULENT FLOW -

$$F_{TOT} = 4.75 \text{ SLPM} \quad P_{ATM} = 1.017$$

$$P_{ATM} \approx 70 \text{ KPA}$$

$$F_{TOT} = 6.87 \text{ LPM}$$

$$T \approx 273 \text{ K}$$

TUBING DIAMETER = 4 mm i.d.  $A = 0.1257 \text{ cm}^2$

FOR  $Re = 2500$

$$v = 0.002 \text{ m/s} \quad V = 9.13 \text{ m/s}$$

NEED A FLOW OF 6.9 LPM; VERY CLOSE !!

MAY NEED TO INCREASE THE FLOW - BUT NEED TO BE  
CAREFUL AT THE PRESSURE TRANSDUCER FROM WHICH MAY  
GO OFFSCALE

LAG TIME =  $\approx$  17.6 METERS OF TUBING

$$LAG = 193 \text{ SEC}$$



10/22/98 - NET RADIOMETER TO INSTALL AT 26 METERS

Q7.1 SERIAL# 096333

CALC 9.22 W<sup>2</sup> M<sup>2</sup> V<sup>2</sup> (+)  
11.30 W<sup>2</sup> M<sup>2</sup> V<sup>2</sup> (-)

REBURIED  
2 HEAT FLUX  
PLATES  
HERE'S THE  
NEW MAP!

11963432  
#7 - HT  
91793076  
#8 - HT  
STEP #96018  
ANALYSIS  
NEAR TESTS

11973074  
#9 - HT  
11973073  
#10 - HT  
STEP-96020  
ANALYSIS  
#13

STATIONARY  
ROCKY

10432  
ROCKY

10.5  
MGR

10.5  
MGR

670868 H HT 9#  
11973077  
#5 HT H  
#2

DO NOT  
TESTS

11963431  
#2 HT  
11973078  
#1 HT

STATIONARY  
ROCKY

STEP-96019  
ANALYSIS

11973075  
#3 HT  
11963430  
#4 HT

STATIONARY  
ROCKY

10.5  
MGR

10/22/99 3:45 PM: RECOVERED + SPANNED THE EC O<sub>2</sub> SYSTEM  
SEEMS OK

TURNED FLOW UP TO 500 SLPM

MONITORED RAFT SENSORS

#1 => LEVEL 2 => 3 METERS (MAY MOVE THIS DOWN TO 2m)  
#2 => LEVEL 4 => 8 METERS

10/29/98 CAME BACK FROM AMERIFLUX MEETING  
DUCK WAS DEAD

STOP ARCHIVING DATA ON

OCT. 27 (TUESDAY) - 18:24 (6:30 PM)

COULD BE WHEN SNOW WAS FALLING  
& SINCE NO KEYBOARD - DUCK  
WILL NO REBOOT (IF POWER WENT OUT)

GOT NEW KEYBOARD FROM BILL BOWMAN & REBOOTED  
- STILL DOESN'T WORK -

11/2/99 - CAME BACK OUT W/ MONITOR

DUCK SEEMS OK BUT BOWMAN/KEYBOARD  
ISN'T WORKING

- SWITCHED KEYBOARDS & LOGGED INTO THE DUCK  
IT'S ALSO BACK ON THE NETWORK!!  
SEEMS OK

11/4/98 TURNED QUACKER BACK AT ~ 10:30 AM

2<sup>ND</sup> DATA LOGGER - CHANNEL 202 RUNNING AT 12:00 PM  
(REL. HUM., P<sub>tot</sub>, P<sub>NS2</sub>)

ALSO NOTICED AT 12:00 PM -  $\phi$  AIR AIR EC LICOR WAS EMPTY

- REFILLED SMALL CYLINDER W/  $\sim 550$  PSI

- REATTACHED AT  $\sim 12:50$  PM - SHOULD BE OK AFTER THIS.

$\phi$  - FILLED SMALL CYLINDER W/ 1800 PSI OF US WELD. GAS. #1  
(3500 PSI CO<sub>2</sub>)

WILL CALIBRATE THE NEW TENS I'M UP HERE.

# 11/5/98 CURRENT WIRING FOR DATALOGGERS THAT ARE IN USE -

## I. 23K - FAST DATA - LOCATED ON LEVEL 10

### INPUT CHANNELS

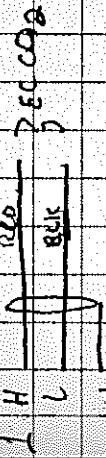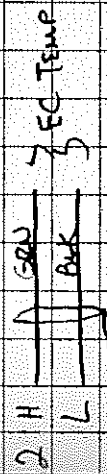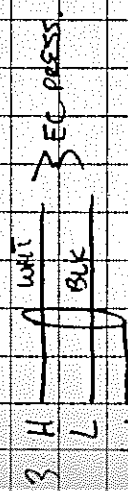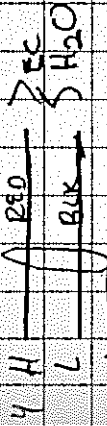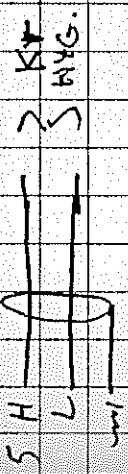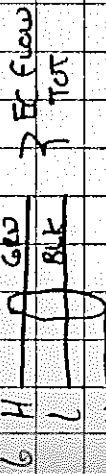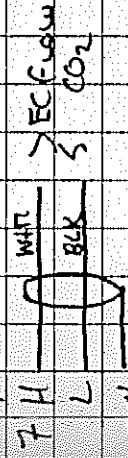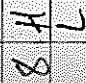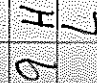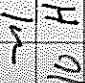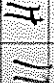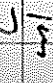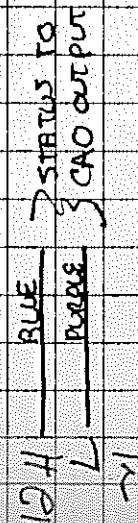

### CONTROL I/O

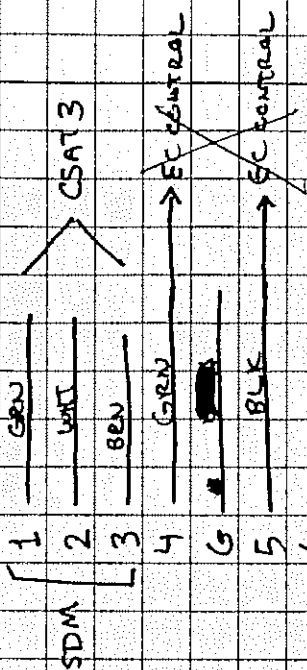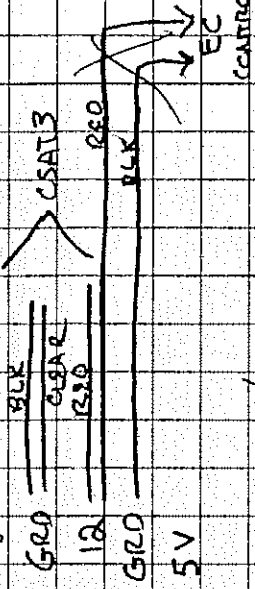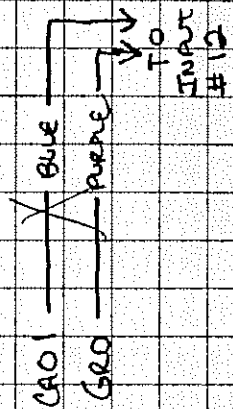



II. 2/x- LIGHT - LOCATED AT LEVEL 10

INPUT CHANNELS

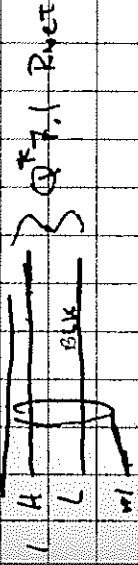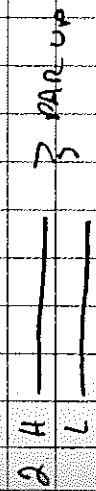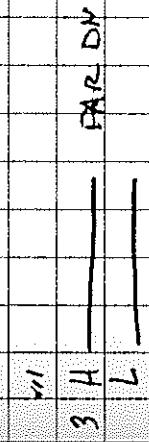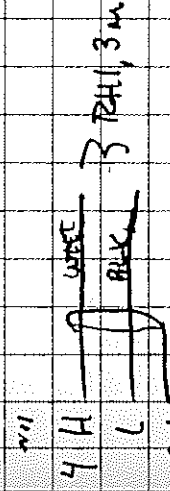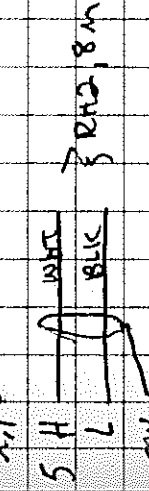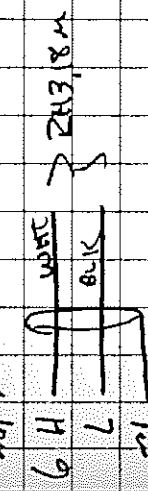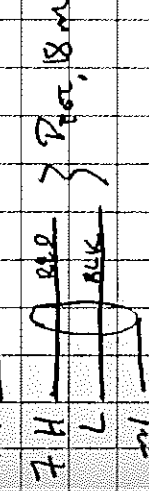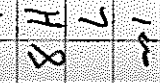

CONTROL I/O

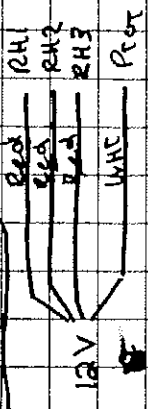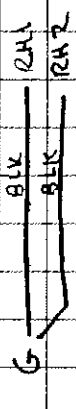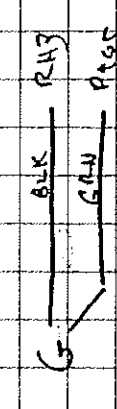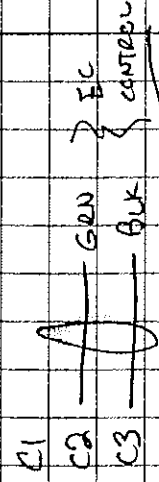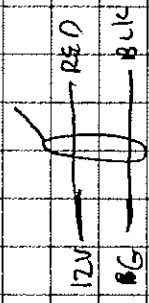

USED 12V AGAIN?

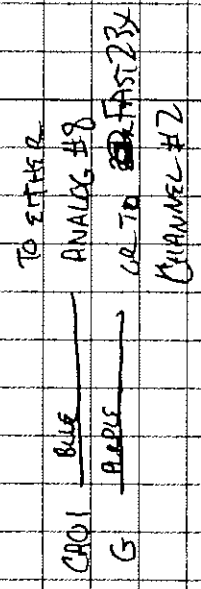

# 234 III PROFILE; LOCATED ON LEVEL 8

## CHANNELS

1 H Red  
L Blk  
m

PROF.  
CO<sub>2</sub>

2 H GRN  
L BLK  
m

PROF.  
T

3 H WHT  
L BLK  
m

PROF.  
P

4 H BLU  
L PURPLE  
m

STATUS-TO  
CAOI

5 H RED  
L BLK  
m

PROF.  
FLOW

6 H  
L  
m

7 H PURPLE  
L BLU  
m

VAS. TEMP  
#1, 2m

8 H WHT  
L BLK  
m

9 H PURPLE  
L BLU  
m

VAS. TEMP  
#2, 8m

10 H WHT  
L BLK  
m

11 H PURPLE  
L BLU  
m

VAS. TEMP  
#3, 18m

12 H WHT  
L BLK  
m

## CONTROL I/O

CONTROL 1

2

3

4

5

6

7

8

PROFILE  
CONTROL

EXECUTE

1

2

3

4

5

RED Temp #1

RED Temp #2

RED Temp #3

12V

G

CAOI

G

TO BNC INPORT  
#4

## CHECKING RESISTORS

RED → WHT ⇒ 100 KΩ

WHT → BLK ⇒ 100 Ω

PURPLE → BLUE ⇒ 100 Ω

$R_1 = 9969.9 \Omega$  #3

$R_4 = 100.043 \Omega$

11/6/98 DUCK WENT OUT AGAIN - BUT HAD REQUESTED  
 A WDS ON-LINE EC TAGA WAS OUT TOP  
 RESTRICTED AT ~ 11:15 AM

POWER MUST HAVE GONE OUT TO CAUSE BOTH THE  
 DUCK & THE TAGA TO GO OUT.

MARKING LONG (24m) SERIAL CABLE  
9pin - 9pin

|     |   |               |
|-----|---|---------------|
| PIN | 1 | RED           |
|     | 2 | BLK           |
|     | 3 | SHIELD/RED    |
|     | 4 | WHIT          |
|     | 5 | BLK           |
|     | 6 | SHIELD/YELLOW |
|     | 7 | GRN           |
|     | 8 | BLK           |
|     | 9 | SHIELD/GREEN  |

SHORT HAUL MODEM WIRING

|      |   |              |   |        |
|------|---|--------------|---|--------|
| DUCK | 1 | TXA (RED)    | → | RED    |
|      | 2 | TXB (BRN)    | → | BRN    |
|      | 3 | RxA (BLU)    | → | BLU    |
|      | 4 | RxB (PURPLE) | → | PURPLE |

(DCE)

~~TXA~~  
~~RxB~~  
~~RxA~~  
~~TXB~~

→ NEXT  
 PAGE

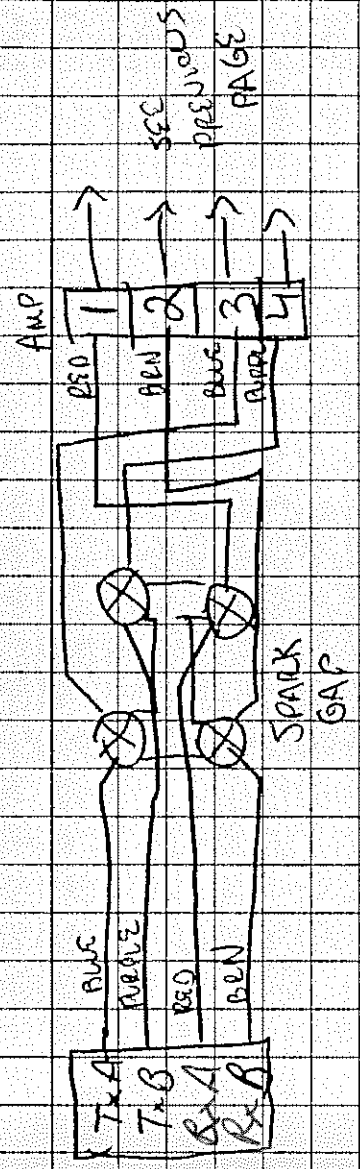

WA/98 - DUCK OUT AGAIN - BUT IS ALIVE  
 RESTORING DATA FROM BOULDER - BUT CO<sub>2</sub> SYSTEM  
 IS NOT RUNNING -  
 6262 DOES NOT TURN BACK ON WHEN POWER  
 OUTAGE OCCURS - MUST USE SWITCH ON THE  
 INSTRUMENT. IS THERE A WAY TO WIRE AROUND  
 THIS? OR DO WE NEED A UPS?

→ LEARNED SOME SUN COMMANDS FROM DAVE

ON URQUELL + FOR TUSTER

TO GET FOOT STATUS:

SUDO MAKEFILE NAME

(MAKE DIRECTORY W/  
 FOOT PROPERTY)  
 TOWNSHIP

SCP => SECURE FILE COPY

TO GET TUSTER TO DISPLAY ON URQUELL:

ON TUSTER

SETENV DISPLAY URQUELL:0

ON URQUELL

XHOST TUSTER

/usr/local/share/projects/  
 NEW PROJECTS/CONV/  
 FILE

TO CREATE ACCOUNTS

SUDO ADMINTOOLS => FOLLOW DIRECTIONS

SUDO CHOWN => CHANGE OWNERS

AS OF 10/28  
 NOT STARTING  
 UP COUNTS

NOTE: DATA FILES OWNED BY ASTER USER

PASSWORD "yakin99"

SP = SET PROJECT  
 (TO LOCK AT OLD PROJECTS)



# 11/9/98 BASIC IDEA OF CO<sub>2</sub> CALIBRATION—

- ① TO START W/ — USE ABSOLUTE MODE  
PUT  $\phi$  AIR OR N<sub>2</sub> IN REFERENCE CELL W/ SHUTDOGS

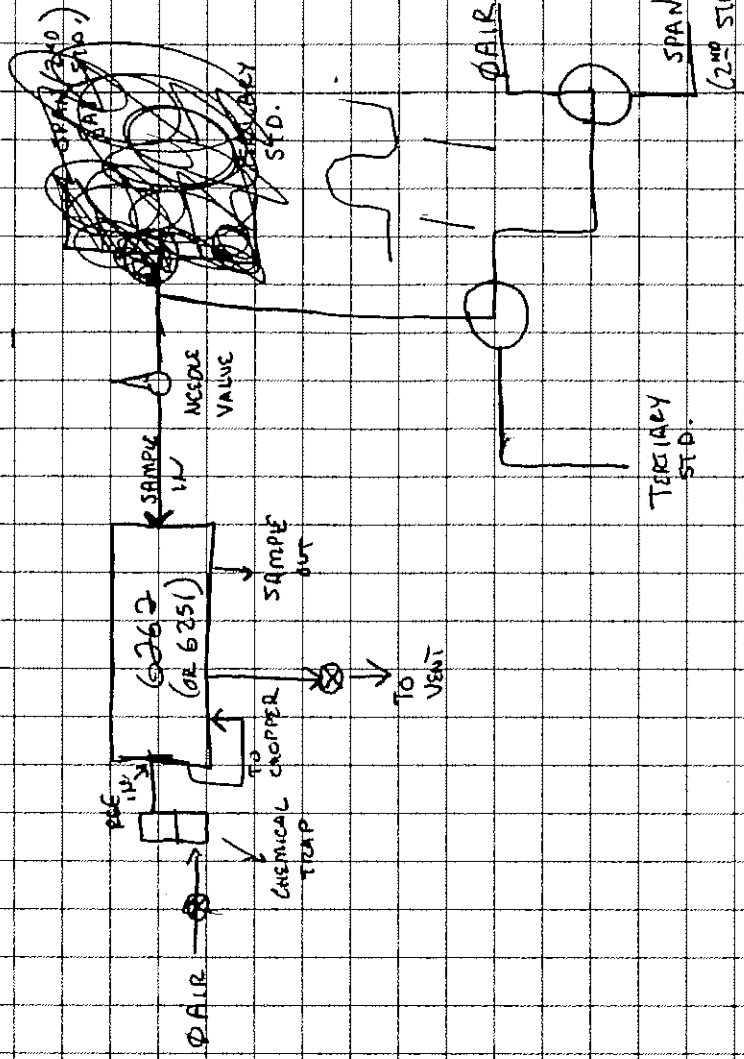

- ② DIFFERENTIAL MODE MIGHT BE BETTER BUT NEED TO  
FIGURE OUT HOW TO DEAL W/ PRESSURE IN THE REFERENCE  
CELL.
- ③ SOME KIND OF STAND FOR THE VALUES..??

11/12/98 — PUT ON LARGE SECT-MAN & AIR TANK  
ON Edg. Cap. SYSTEM  
LAST SMALL TANK WAS NEARLY EMPTY —  
NEW TANK — JUST UNDER 1000 psi

TO COPY FILES FROM RUSSTER TO URGWELL

NOTE - PERMISSIONS MUST BE RIGHT - FILES OWNED BY "ASTER"

FROM THE RAW\_DATA DIRECTORY ON URGWELL AS USER "ASTER"

scp -pv aster@russter:/usr/local/aster/projects/NIWOT/

raw\_data/all/wave

FILE

SPACE

sudo chmod -R aster NIWOT90

CHANGES OWNER OF ALL FILES/DIRECTORIES UNDER NIWOT90

df -h  $\Rightarrow$  get disk space for the system

④ RAW\_DATA IS IN /home disk/directory ON URGWELL  
(NOT ON RUSSTER)

11/13/98 CALIBRATING US WELDING TANK -  
USING SCOTT TANK C =

| ROW | $\phi$  | SPAN   | SAMPLE                  |
|-----|---------|--------|-------------------------|
| 1   | 0.1 ppm | 345.45 | <del>345.45</del> 452.4 |
| 2   | 0.5 ppm | 345.5  | <del>345.5</del> 452.30 |
| 3   | 0.1 ppm | 345.3  | 452.27                  |
| 4   |         | 345.4  | 452.19                  |
| 5   |         | 345.4  | 452.32                  |
|     |         |        | 452.30 $\pm$ 0.15 ppm   |

SCOTT TANK - A - 345.7  $\pm$  0.1 ppm  
B - 341.9  $\pm$  0.2 ppm  
C - 345.4  $\pm$  0.1 ppm

3:35 PM - ZEROED & SPANNED EC IRGA

11/11/98 Making ATI SONIC CABLE -

NEED 6 WIRES

DUPLEX CONNECTIONS

FEMALE  
AMP 9-PIN

|   |           |
|---|-----------|
| 1 | RS232 OUT |
| 2 | RS232 IN  |
| 3 | CHASSIS   |
| 4 | RS232 GND |
| 5 |           |
| 6 |           |
| 7 | +12V GND  |
| 8 | +12VDC    |
| 9 |           |

FEMALE  
AMP 9-PIN

|   |      |
|---|------|
| 1 | RED  |
| 2 | BLK  |
| 3 | GRN  |
| 4 | GRN  |
| 5 |      |
| 6 | BLK  |
| 7 | BLK  |
| 8 | UNIT |
| 9 |      |

RED  
BLK  
GRN

SONIC CONN

|    |           |
|----|-----------|
| 8  | RS232 IN  |
| 9  | RS232 OUT |
| 1  | CHASSIS   |
| 7  | RS232 GND |
| 13 | Vcc GND   |
| 12 | Vcc INDC  |

SHIELDS? - CAN TIE TOGETHER & ATTACH TO CHASSIS GND

TO HOOK UP LAPTOP

|   |                 |
|---|-----------------|
| 3 | TRANSMIT        |
| 2 | RECEIVE         |
| 1 | CHASSIS GND (?) |
| 1 | RS232 GND       |
| 4 |                 |
| 6 |                 |

|   |      |
|---|------|
| 1 | RED  |
| 2 | BLK  |
| 3 | GRN  |
| 4 | GRN  |
| 5 |      |
| 6 | BLK  |
| 7 | BLK  |
| 8 | UNIT |
| 9 |      |

RS232 IN  
RS232 OUT  
CHASSIS  
RS232 GND  
Vcc GND  
Vcc (12VDC)

COMPUTER  
SERIAL 9-PIN  
CONNECTOR

FEMALE  
9-PIN

11/20/08

SHORT HALL CABLES

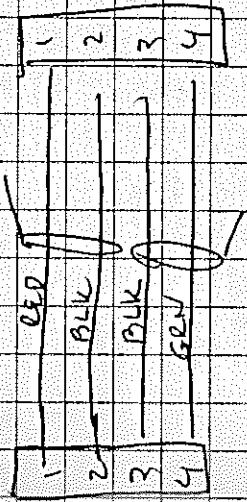

⊗⊗ IMPORTANT NOTE ⊗⊗  
 + SHORT HALLS ON BOTH ENDS  
 SET TO DCE (NOT DTE)

W/ PETER'S ACCE LAPTOP - DOES NOT HAVE 12V DC AVAILABLE  
 ON SERIAL CBT - SO SHORT HALL MODEM DON'T HAVE POWER!

NEW SHORT HALL CABLE FOR LAPTOP

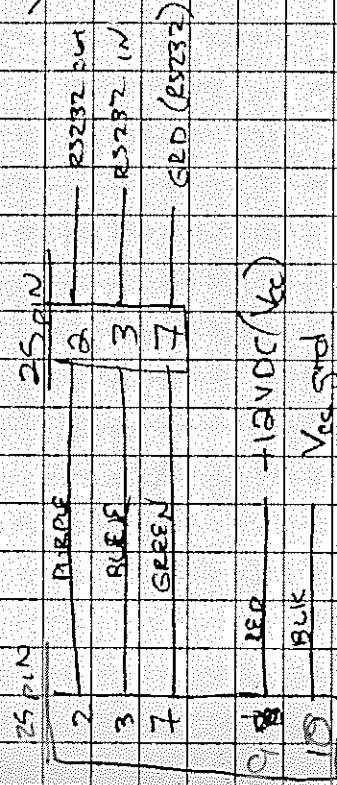

DOESN'T  
 WORK

STILL DOESN'T WORK - NO COMMUNICATION  
 NOW I DON'T UNDERSTAND!

11/24/08

11:15 AM - GOT

PROFILER 23X DATA LOGGER RUNNING (LEVEL 7)  
 PROFILER IS NOT HOOKED UP - BUT VAISALA TEMP. SENSORS  
 ARE -> LOGGING TEMPERATURE DATA NOW

AT 3 HEIGHTS

⊗⊗ NOTE ON TEMP. = 7 MULTIPLIERS IN CAMPBELL  
 CODE IS SET TO 1.000.

TEMP #3 - 18M

I NEED TO REDUCE THE LENGTH OF THE CABLES,  
 ONE - 134 - GMS TO 80 FT = 2 USE PRECISION  
 RESISTOR ~~BEING~~ BEING SENT BY REAR

DOESN'T APPEAR  
TO BE WORKING!

CHECK RESISTORS

⊗⊗ STILL OVER 500 PSI ON 0 ARE (LARGE

SHORT - MARRAN EX-114018



|        | <u>SW</u> | <u>NW</u> | <u>NE</u> | <u>SE</u> |
|--------|-----------|-----------|-----------|-----------|
| Top    | 1         | 500       | ✓         | 550       |
| ↑      | 2         | 500       | ✓         | ✓         |
|        | 3         | ✓         | 650       | ✓         |
| Bottom | 4         | ✓         | 700       | ✓         |

12/3/98 - Working on the profiler pump -

MEASURING  $\lambda_{\text{COM}}$  DIRECTLY AT THE EXIT (SPRINGING AND GUNNEL)  
 $\lambda_{\text{COM}} = 0.6 \text{ cm}$

Added bus (n 304) - 3105590 1745

MEASURED AT FILTER (TAKING FILTER OFF)

| LEUGL | $\ell$ | $E_{\text{corr}}$ | $\ell_{\text{corr}}$ |
|-------|--------|-------------------|----------------------|
| 1     | (1m)   | 2.41              | $\ell_{\text{corr}}$ |
| 2     | (2m)   | 2.46              | $\ell_{\text{corr}}$ |
| 3     | (4m)   | 2.31              | $\ell_{\text{corr}}$ |
| 4     | (8m)   | 2.39              | $\ell_{\text{corr}}$ |
| 5     | (16m)  |                   |                      |
| 6     | (24m)  |                   |                      |

⑧ EACH TUBING LENGTH IS  $\approx 72'$  LONG

PROB. PROBLEM - WHEN YOU PUT IN MAG PERMEATE TRAP -  
PRESSURE DROP IS TOO MUCH - PRESSURE SENSOR IN  
LIGOR GOES NEGATIVE  
RAISED UP THE FLOWS

USING 0-500 SCCM MFC

| RUN | MFC<br>RAW VOLT | → FLOW (SCCM) | FLOW (OH<br>SET (POT.)) | READOUT | P (IRGA) -<br>mV |
|-----|-----------------|---------------|-------------------------|---------|------------------|
|     |                 |               |                         |         |                  |
| 1   | 2.94            | 254           | 700                     | 1426    | -641             |
| 2   | 2.00            | 200           | 400                     | 852     | -166             |
| 3   | 1.00            | 100           | 200                     | 426     | +382             |
| 4   | 1.50            | 150           | 300                     | 640     | -139             |
| 5   | 2.00            | 200           | 400                     | 848     | -171             |

⊗ TIME TO FLUSH TRAP (W/ PHAR)

|     |              |
|-----|--------------|
| RUN |              |
| 1   | 30 SEC       |
| 2   | 45 SEC       |
| 3   | 1 MIN 48 SEC |
| 4   | 1 MIN 5 SEC  |
| 5   | < 50 SEC     |

⊗ FLOW ARRANGEMENT - GOES THRU 2  $\frac{3}{4}$ " x 6" MAG PERME. TRAPS  
THEN THRU A  $\frac{1}{8}$ " x 6" GLASS TRAP

IF USE SMALLER TRAP - DESSICANT BURNS OUT TOO QUICKLY.  
(THIS ARRANGEMENT MAY NOT BE GOOD ENOUGH.)

12/14/98 NOTICED VARIATA TEMP. SENSOR AT 18" IS GIVING ONLY 0.005  
CHECKED THE RESISTANCES ⇒ THEY SEEM OK

⊗ CHECK TO SEE IF EXCITE CHANNEL IS WORKING

⊗ SWITCH W/ ONE OF OTHER TEMP. SENSORS  
WIRING

12/3/38 - ANOTHER PROFILER PROBLEM

WHEN CONTROL LINE IS HOOKED UP - DATA LOGGER  
DOESN'T MEASURE ANY SIGNALS??

SIGNALS GOOD OK IF YOU DISCONNECT THE CONTROL LINE

12/4/98 - PREVIEW W/ PROFILER COULD BE A GROUND MISMATCH  
RELAYS A DEMUX CHIP GET 5VDC FROM POWER SUPPLY  
AT PROFILER - BUT OV IS SET BY THE DATA LOGGER,  
THEREFORE WHEN A VALUE IS ACTIVATED - CURRENT  
MUST flow FROM PROF. POWER TO DATA LOGGER.  
→ COULD BE THAT THERE IS TOO MUCH CURRENT FOR  
LOGGER TO HANDLE!

⑦ CAMARILL PROGRAMMING NOTE - TO CHANGE JUST 1 PORT ON

THE CR23X - USE "DO" COMMAND <P86>

Followed by

|    |    |     |      |    |      |   |         |
|----|----|-----|------|----|------|---|---------|
| 45 | => | SEC | POST | 75 | 1164 | / | W01C 10 |
|----|----|-----|------|----|------|---|---------|

55 => sec port 5 done ✓

→ CAN USE IN FAST 23x.csi

BOFFER

SKOLIN SS ABLE TO USE ~~DETECT~~ CHD + DATABASE POWER

TO ~~DO~~ COMPLETELY RUN THE PROFILER (DO NOT USE MFC POWER SUPPLY)

TAKE CONTROL BACK out of profiler ✓ WISE UP

USE 12V FROM LOGGED & TRY IT - OTHERWISE PUT IN A

From 10552

2398

BUCKET CHIP

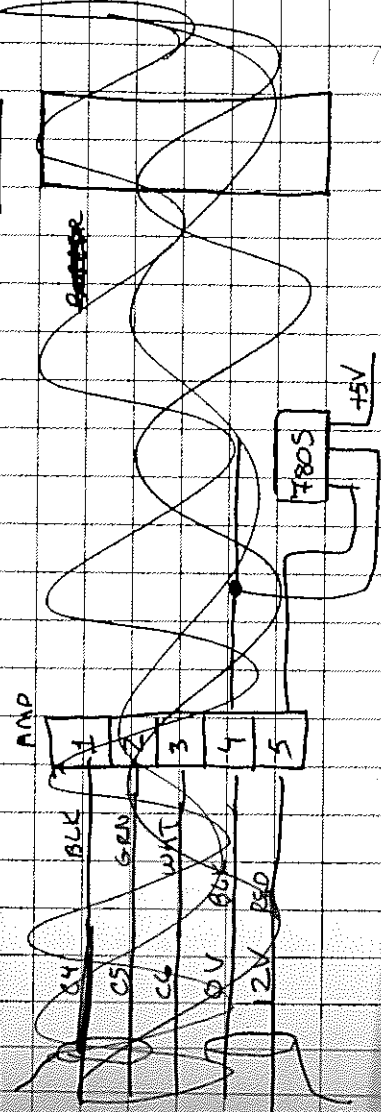



12/14/78 PUTTING MKS BARATREN ON EL CO2

FC OFFLINE AT 2:20 PM

MKS AT EXPT OF L/COR

| TIME    | IRGA P (AV)       | IRGA P (REL) | Flow            | MKS RAW         | MKS READ         |
|---------|-------------------|--------------|-----------------|-----------------|------------------|
| 2:29    | 759.9             | 70.521       | 0.00            | 5.43            | 2.180            |
| 2:32    |                   |              | <del>4.84</del> | <del>4.84</del> | <del>1.864</del> |
| 2:34    | 127.00            | 60.907       | 4.84            | 4.63            | 1.864(0)         |
| 2:36    | <del>127.00</del> | 62.904       | 4.06            | 4.79            | 1.924            |
| 2:39    | 419.25            | 65.381       | 3.02            | 4.99            | 2.002            |
| 2:41    | 605.6             | 68.18        | 1.60            | 5.22            | 2.093            |
| 2:43    | 530.37            | 67.035       | 2.23            | 5.12            | 2.055            |
| 2:45:30 | 33.5              | 59.713       | 5.32(0)         | 4.50            | 1.813(07)        |
| 2:47:30 | -69.2             | 57.92        | 5.81            | 4.37            | 1.759            |
| 2:50    | -74.4             | 47.66        | 7.87            | 3.52            | 1.419            |

P/C IN BIG NEEDLE VALUE CN CALIBRATION LINE -  
 $P = 1.414 \text{ V (MKS)}$   
 $F = 7.87$

WT SPAN -  $P = 1.399$   
 $F = 7.80$

$\phi =$  off by 1.5 ppm  
 SPAN = off by 6 ppm !!

$$\frac{1_{\text{Total}}}{760 \text{ Torr}} = \frac{0.13329 \text{ kPa}}{101.3 \text{ kPa}} \frac{\text{RA}}{\text{Torr}}$$

$$\text{VAISALA READOUT} = 1136 \text{ mV}$$

$$P = 71.367 \text{ kPa}$$

(\*) CHECK TO SEE  
 WHAT THE VAISALA  
 PRESSURE WAS

APP

$$m = 0.90223 \pm 0.0039$$

$$\delta = 5.93 \pm 0.25$$

$$0.9045 \pm 0.009$$

$$5.212 \pm 0.59$$



~~11/6/98~~ 11/6/98 DUCK DIED AT 8:05 AM ON JAN. 5TH  
 → HAD POPPED A CIRCUIT BREAKER → DUCK LOOKS OK

- (\*) NOTE - FUSSTER MONITOR ACTING FUNNY - WARN'S WORKING FOR A WHILE - THEN CAME BACK ?  
 NOTED SOME H<sub>2</sub>O HAD COME THRU CABLE PORT  
 & GOTTEN ON MONITOR - SEALED UP CABLE PORT  
 & DRIED OFF MONITOR

### OTHER PROBLEMS

- RAN OUT OF O<sub>2</sub> AIR FOR IRGA
- RAN OUT OF SPAN GAS FOR IRGA

- (\*) NOTE - SHOULD NOT HAVE RUN OUT OF ZERO AIR SO QUICKLY - MUST BE A LEAK IN THE CALIBRATION SYSTEM  
 (THESE ARE THE ONLY FITTINGS THAT I HAVE TAMPARED WITH)

(DHP) PUT SMALL N<sub>2</sub> (1000psi) CYLINDER ON IRGA REFERENCE CELLS - DISCONNECTED THE CALIBRATION BURNING & CONTROL LINES; BEFORE DISCONNECTING, I RE-ZEROED & SPANNED MANUAL  
 [ O<sub>2</sub> - DEC ABOUT 2.5ppm  
 [ SPAN - DEC ABOUT 1ppm

- (\*) SO UNTIL FURTHER NOTICE ⇒ NO AUTOMATIC CALIBRATIONS!!

1/7/98

RESTARTED DATA COLLECTION!

ALSO HOOKED UP DIGITAL OUTPUT FROM EC IRGA TO FAST 23X ANALOG CHANNELS

CHANNEL 10 - CO<sub>2</sub>

CHANNEL 11 - H<sub>2</sub>O

EXTRA SPECIES OUTPUT PORT

| CHANNEL | SPECIES          | VOLT. RANGE | MIN       | MAX        |
|---------|------------------|-------------|-----------|------------|
| 23A     |                  |             |           |            |
| 10      | CO <sub>2</sub>  | 0-5V        | 300 ppm   | 450 ppm    |
| 4       | H <sub>2</sub> O | 0-5V        | 0 mm/1000 | 20 mm/1000 |

⑧ CHANGED PREP. CONFIG LABELS

FAST 234; a9 → CO<sub>2</sub> dig

CH. 202 a10 → H<sub>2</sub>O dig

Flow. CO<sub>2</sub> → MKS-P

1/8/99

SURGE PROTECTOR BOX FOR NEW ATI

ELECTRICAL WIRING

9-PIN  
AMP ~~ATTN~~

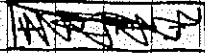

ATI AMP (CONN)

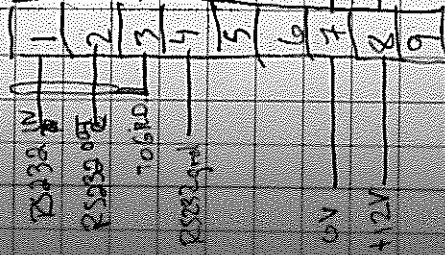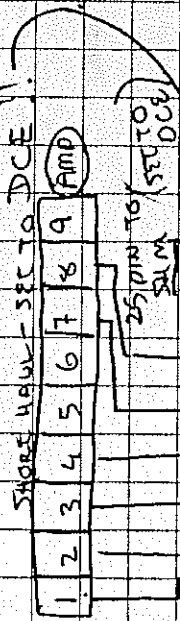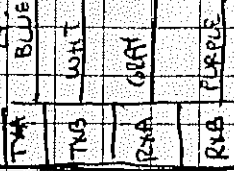

BLK  
RED

250 OHM

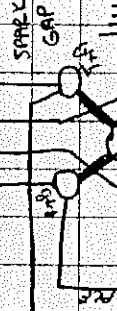

SPARK GAP

12V

0V

12V

11/2/58 - CALIBRATING A NEW  $\text{O}_2$  STA.

SCOTT TANK

USING SPAN = 345.4 ppm

| RUN | ZERO     | SPAN       | SAMPLE    |
|-----|----------|------------|-----------|
| 1   | 0.2 ppm  | 345.4 ppm  | 350.9 ppm |
| 2   | -0.3 ppm | 345.36 ppm | 350.75    |
| 3   | 0.11 ppm | 345.5 ppm  | 351.30    |
| 4   | 0.13 ppm | 345.58 ppm | 351.10    |
| 5   | 0.02 ppm | 345.3 ppm  | 350.80    |
| 6   | -0.000   | 345.46 ppm | 351.05    |

 $350.98 \pm 0.41 \text{ ppm (2\sigma)}$ 

RECALIBRATING OLD STA

|   |          |            |            |
|---|----------|------------|------------|
| 1 | 0.02 ppm | 345.40 ppm | 453.97     |
| 2 | 0.5 ppm  | 345.37 ppm | 454.22     |
| 3 | 0.13 ppm | 345.22 ppm | 453.85     |
| 4 | 0.00     | 345.42     | 454.17 ppm |
| 5 |          |            |            |

 $454.05 \pm 0.35 (2\sigma)$ 

PREVIOUS MEASUREMENT

 $452.3 \pm 0.2 \text{ ppm}$ 

DIFF = 1.75 ppm

ABOUT ~~10~~  $\rightarrow$  MANUALLY RE-ZEROED + SPANNED USING THE NEW STD. TANK

11/13/59

MANUALLY

RE-ZEROED + SPANNED EC IRGA; STARTED AUTO-CALS! ABOUT 2:00 PM!!

⊗ TEMP. SENSOR AT ~~10~~ 18 IN SEEMS TO BE WORKING FINE WHEN TIM CONNECTED TO THE LAPTOP; HOWEVER DUCK IS GETTING NOTHING BUT ZEROS. MUST BE A COOE PROBLEM, BUT I DON'T KNOW WHERE. OBVIOUSLY THIS TEMP. IS NOT GETTING SENT PROPERLY TO FINAL STORAGE.

⊗ ALSO - MY REVISED "FAST23x" COOE STILL SCREWS UP THE SONIC WHEN IT TRIES TO SWITCH ON VALUES - DON'T KNOW WHY. 71



1/14/98 Replaced pump in profiler (2nd one was dead)

Too windy to test profiler but I put it together + left it running on level 4 (8 meters) to get an avg. CO<sub>2</sub> within the canopy.

Will test on the next calm day.

① NEED TO CHECK PROFILER CONTROL CABLE - WHAT ARE THE AN-OUTS??

|     |   |                  |   |   |
|-----|---|------------------|---|---|
| RED | — | +5V              | — | 5 |
| BLK | — | G                | — | 4 |
| GRN | — | C5               | — | 2 |
| BLK | — | <del>C6</del> C4 | — | 1 |
| WHT | — | C6               | — | 3 |
| BLK | — |                  |   |   |

1/28/99

① DUCK QUIT SENDING DATA AT 2:12 AM  
RESTARTED EVERYTHING SEEMED FINE

② Turned profiler on - started running in the afternoon

③ GOT - REL. HUM. SENSOR AT 18m RUNNING AGAIN  
- TEMP. AT 2m RUNNING AGAIN (W/ REBS RESISTORS)

④ Problem - To hook up Rel. Hum. sensor - had to turn off 21x & then reload program, this starts up EC calibration sequence - bug in Campbell code turns on span per 1st 4 hours. By the time I discovered this - almost got our span gas!

⑤ Turned off calibrations



1/29/99 -

(\*) DISCOVERED THAT AFTER QUIT ARCHIVING YESTERDAY  
DIDN'T KNOW WHY? !?  
COREKIT WAS STILL RUNNING LONG AFTER THE ARCHIVER  
QUIT GOING

ARCHIVER QUIT AT 9:42AM (ABOUT THE TIME  
I RESTARTED THE DUXF)  
COREKIT WAS RUNNING AT 3:00PM (1500)

~~(\*) WHEN I RESTART~~

(\*) STOPPED & RESTARTED DUXFER AT ~10:30PM  
JAN. 29TH

NOTE - WHEN I STOPPED IT - THERE WERE PROCESSES  
RUNNING THAT IT HAD TO KILL!!

(\*) DISCOVERED WHY TEMP - I WAS NOT RESPONDED

(1) IN CHANNEL - CONFIG

LOOK AT : SIO\_MSG - FORMATS/SIO\_CONVERTERS

FOR CAMPBELL LOGGERS:

CAMP\_21K IN BIN - (# OF DATA CHANNELS)  
THAT YOU EXPECT

~~---~~

(2) THEN GO TO : COL\_DEST/LOCAL/ASTER/CONFIG/SIO\_MSG\_FORMATS  
& CREATE THE CAMPBELL FORMAT

GIVE NAME: (camp\_---in\_bin #)  
ABOVE

AND NUMBER OF BYTES = (# CHANNELS) x 2  
(dials)

(\*) NEED TO CHECK THIS FOR AT1 SENS !!

23/09

71.3m SEEMS TO HAVE GONE BAD  
AROUND MIDNIGHT (RECALLY ABOUT 12:30 AM)

Went way off

CALS. EC  $\Rightarrow$  BRIGHT AT 1:30  $\Rightarrow$  BAD NEWS!

④ NEEDED TO CHANGE THIS  $\downarrow$  SEC IT OFF THE HALF HOUR!!

④

REVIEWER CALIBRATIONS CORRUPT

AT 2:15 AM I SUBSEQUENTLY SWAP 4 PPS.

24/09

CALIBRATING A NEW SPAN GAS TANK

USING SEWITT C CYLINDER AS STD: 395.4 ppm

| ROW | ZERO                 | SPAN   | SAMPLE |
|-----|----------------------|--------|--------|
| 1   | 0.16 ppm             | 345.5  | 363.80 |
| 2   | 0.050                | 345.3  | 363.70 |
| 3   | -0.02                | 345.3  | 363.87 |
| 4   | <del>0.04</del> 0.04 | 345.35 | 364.08 |
| 5   | -0.02                | 345.5  | 363.92 |
| 6   | 0.00                 | 345.3  | 363.80 |

AMP CONN. - VARS RT/T  
SENSOR

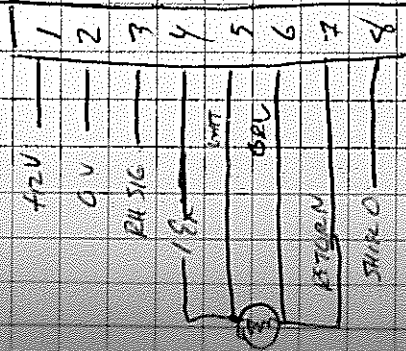

ON VARS #1  $\Rightarrow$  NO CONN. BETWEEN 6 & 7  
 $\downarrow$  SHOULD BE - BAD CABLE.

AT 3:30  $\Rightarrow$  TOOK THIS SENSOR DOWN -

~V.37 PM MANUAL ZERO ✓ SPAN OF 5V IRGA  
 ~ 4 ppm → 55T

1:40 → BACK ON-LINE → STARTING AUTO-CALS.

~~1:41~~  
~~1:42~~  
~~1:43~~  
~~1:44~~

PRODUCER

DESSUCES

L1 = 616

L2 = 612 mV

L3 = 614 mV

L4 = 614 mV

L5 = 617

L6 = 616 mV

68.35 kPa

C<sub>100</sub> = 363.9 ppm

T = 17.92°C (291.1 K)

$$\frac{T_0}{T} = 1.0615$$

$$V \frac{T_0}{T} = F^{-1} \left( V \frac{T_0}{T} \right)$$

$$V \frac{T_0}{T} = 386.27$$

$$V \text{ TABLE} = 26.72 \text{ mV}$$

1:50 → MANUAL MODE

ZERO - 1.54 ✓

SPAN

D = 0.37

68.722 kPa

$$\frac{V}{P_0} = 0.6784$$

$$V_{\text{CALC}} = 1378.5$$

$$V_{\text{REF}} = 190.7$$

BACK ON-LINE AT 2:00 PM

\* NOTE - ON PRODUCER - RE MANUAL CONTROL - NEEDED TO  
 UNPLUG CONTROL CABLE ON OUTSIDE OF BOX





3/3/89

NEW (2) 2.0 1.20 1.00

Manual Calc

EC SYSTEM 1.28 → 1.28 (1.33)  
(TAKEN AVERAGE)

— PROFILES —

$$\frac{1}{T} = 11.42 \text{ (C)} \Rightarrow \frac{1}{T_0} = 0.0211$$

$$\left(\frac{1}{T}\right) = 3.75 \text{ (C)} \Rightarrow \sqrt{\frac{1}{T}} = 1.93674$$

$$\rho \sim \frac{0.16}{450 \text{ mV}} = 0.000355$$

$$\frac{1}{T_0} = 0.0211$$

$$V_{0.16} = 14.21 \text{ (14.15)}$$

$$D_{0.16} = 1.44$$

Soil Log

|                    |                |
|--------------------|----------------|
| Cont. 1, 2, 3      | 1, 2 → AM416-R |
| Exc 1, 2, 3, 4 (?) | 3 → AM416-b    |
|                    | 4 Tc           |
|                    | 5 Tc           |
|                    | 6 —            |
|                    | 7 AM25T        |
|                    | 8 —            |

3/3/89 — MANUAL CAL. OF EC SYSTEM 12.00 mV

MANUAL CALC OF ~~THE~~ SYSTEM  
 $\text{CO}_2 \text{ SPAN} = 363.9 \text{ ppm}$   
 $T = 16.3^\circ\text{C}$   
 $T_0 = 0.93688$   
 $C \frac{T_0}{T} = 388.4 \Rightarrow \underline{\underline{2091 \text{ mV}}}$   
 $P \sim 597 \text{ mV} \Rightarrow \text{IN SAMPLE MODE}$

13:10 0.013  $\Rightarrow$  SET TO 0.000  
 $P_{\text{SPAN}} = 596$  68.079 kPa  
 $P_{T_0} = 0.67205$   
 $V_{\text{CALC}} = 1371.7$  (1368)

3/6/99

NEW CO<sub>2</sub> CAL TANK

SEED TANK C = 345.4 ppm

| Run | Zero  | Span   | Sample        |
|-----|-------|--------|---------------|
| 1   | 0.100 | 345.35 | 351.97        |
| 2   | 0.1   | 345.40 | 352.40        |
| 3   | 0.02  | 345.50 | 352.28        |
| 4   | 0.06  | 345.40 | 351.57 (low?) |
| 5   | 0.04  | 345.55 | 352.40        |
| 6   | 0.00  | 345.55 | 352.40        |
| 7   | 0.06  | 345.52 | 350.10        |

352.16  $\pm$  0.62 ppm  
 (20)

(352.26  $\pm$  0.37 ppm WHEN ON IT  
 (20) RUN #4

POT NEW CO<sub>2</sub> STO. V AIR AT TOWER!

3/17/99

HOTTEN UP ATV SONIC

AT 8 METERS (JUST TO SEE IF IT RUNS)

AT 9:45 =&gt;

CHANGED THE CONFIG FILES ON MUSTER/DUCK

⑦

ALSO STARTING CALCULATING COARS DATA  
FOR THE PROOFER

⑧ =&gt;

SONIC APPEARS TO BE SPIKING A GREAT DEAL!!

1) A FEW LONG OF A SERIAL CABLE (?)

↳ SOLUTION - TRY THAT SHALL MIGHT

2) ELEVATION - CALL STEVE OSBORNE

LET IT RUN FOR A FEW HOURS &amp; THEN LOOK AT THINGS

P

- 3/18/99

- DATA GONE

9:30 -&gt; 12:00

REPLACING BATTERIES

A) CLEANED K. HVC - STILL NOT WORKING

B) CHANGED MUSTER FILTER FOR CO2

③ MOVED STATUS.DC -> TO FAST-23,  
CHANNEL 13

3/22/99

CHANGED PEP.CONFIG

TO REFLECT CHANGE IN STATUS.DC!

④

NOTE - DOESN'T SEEM TO BE WORKING RIGHT  
NOT GIVING THE PROPER VOLTAGES

(MAKE AN AVERAGE -&gt; GOING FROM 10HE TO 1500)

⑦ ALSO

ERROR IN COARS.CONFIG

100 COARS DATA FROM

3/17 -&gt; 3/22/99



# \* MANUAL CHK. OF EC SYSTEM (ZERO VOLTAGE)

ATI SONIC

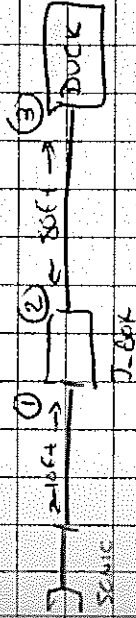

(2) DISCONNECTED FROM DUCK + POWERED TO LAPTOP + 12V POWER SUPPLY AT (3)

- STIK SEE SPIKES IN DATA  
(SOME 0-15 → GROUND SPIKE)

(b) PUT LAPTOP/POWER SUPPLY AT (1)

- STIK SEE SOME SPIKES - MAYBS NOT AS MANY (?)  
SPIKES SEEM TO COME DURING BIG WIND GUSTS !!

WHAT WE KNOW -

NO PROBLEMS W/ JUCK POWER SUPPLY OR DATA-WIRE

POSSIBILITIES -

(1) IRRAW CABLE IS TOO LONG → HOOK UP SHORTER CABLES

(2) GROUND LOOP BETWEEN J-BOX + DUCK

(3) DON'T THINK J-BOX IS GROUNDING MIGHT NOW

(3) SONIC IS ACTING BAD  
→ CALL STEVE OSBORNE



3125- Ideal for calculating delay time in EC CO<sub>2</sub> AS  
A function of flow rate

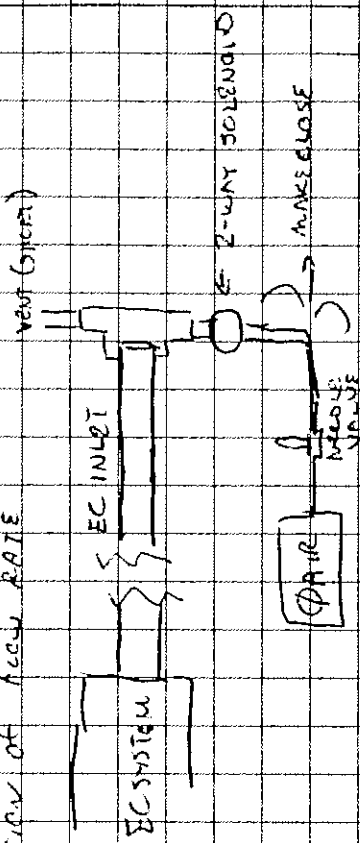

WIRING:

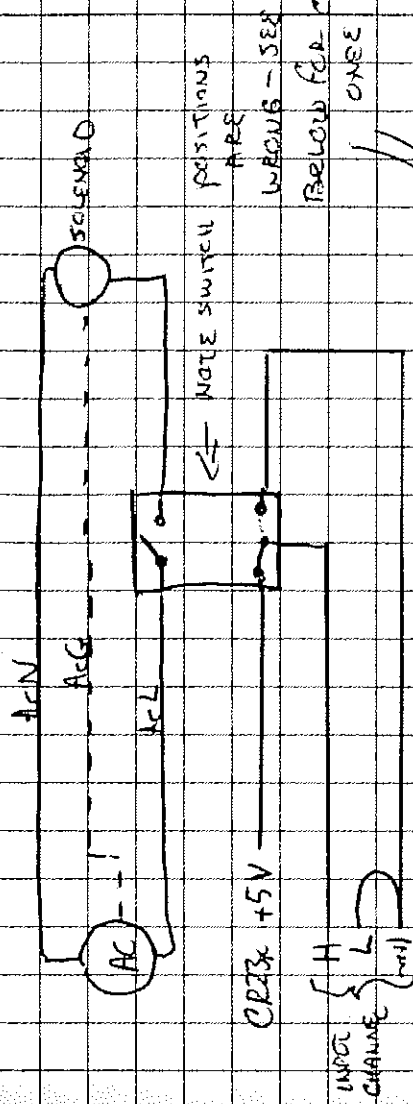

"OFF"

Switch goes ON  
get signal at 23m  
+ PAIR AT INLET

Δt BETWEEN SWITCH  
SIGNAL + CO<sub>2</sub> DROP

IS DELAY TIME

⇒ VARY THE PUMPING SPEED

+ get

DELAY =  $f_{EC}(\text{flow})$

$f_{EC}(\text{PRESSURE})$

⇒ DON'T NEED HUGE AIR  
PULSE - JUST ENOUGH  
TO DROP CO<sub>2</sub> BY 20-50ppm  
(will work for H<sub>2</sub>O too)

NEED  
TO  
PUMP

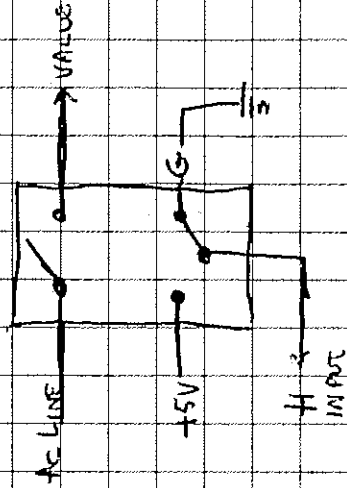

"ON"

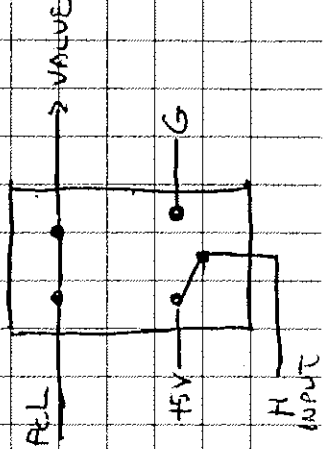

3/31/99 - Redrawing last picture

- SAME PLUMBING DIAGRAM

- ELECTRICAL - DON'T USE 23x POWER SUPPLY TO GET A

SIGNAL AT DATA LOGGER

USE A 12V POWER SUPPLY

PORT 12VDC - SWITCHED  
STATUS BACK TO 21x

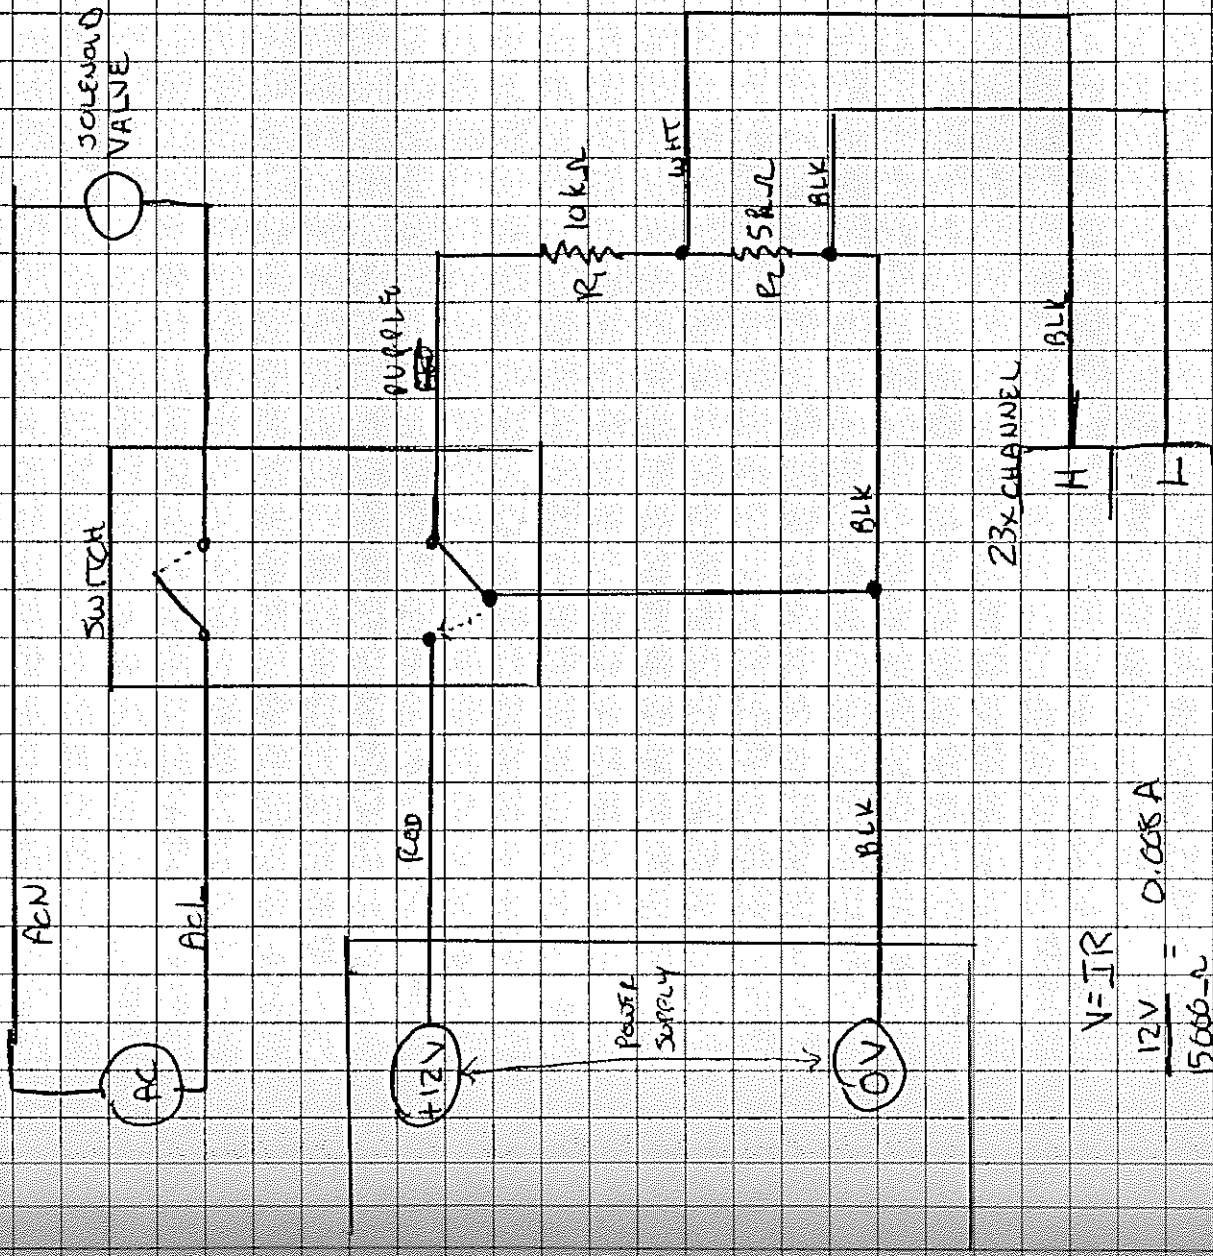

$$V = IR$$

$$\frac{12V}{5000\Omega} = 0.0024A$$

$$I_{TOT} = 0.0024A$$

$$V_{TOT} = I_{TOT} R_1 + I_{TOT} R_2$$

$$V_{TOT} = V_1 + V_2 = I_{TOT} R_1 + I_{TOT} R_2$$

$$V_1 = I R_1 = 8V$$

$$V_2 = I R_2 = 4V$$

→ what we will measure

4/5/89 Looking at LAG TIME  
 @ AT SOME DIFFERENT TIMES -

FILES:

(RESULTS FROM FUN DELAY)  
 / home / stat / startup / results / delay. # (# = 1-10)

| FILE | TIMES             | MEAN<br>LAG | MEAN PRESS. (kPa) | MEAN FLOW (L/V) |
|------|-------------------|-------------|-------------------|-----------------|
| 1    | DEC 2 10-11hrs    | -2.9 ± 0.1  | 60.4 ± 0.1        | 471             |
| 2    | DEC 6 10-11hrs    | -2.75       | 59.9              | 530             |
| 3    | DEC 8 10-11hrs    | -6.3        | 60.7              | 600             |
| 4    | DEC 10 10-11hrs   | -3.0        | 61.1              | 491             |
| 5    | DEC 15 10-11hrs   | -1.6        | 48.3              | 785             |
| 6    | DEC 21 10-11hrs   | -1.9        | 47.5              | 1051            |
| 7    | MAR 13 10-11hrs   | -1.63       | 47.85             | 794             |
| 8    | MAR 5 10-11hrs    | -2.21       | 47.4              | 876             |
| 9    | MAR 27 9-10hrs    | -2.23       | 47.2              | 799             |
| 10   | MAR 27 1330-18hrs | -2.6        | 47.4              | 808             |

DEC 1-31

④ WHAT INITIATED THIS - Looking at COWARS DATA; see LARGE VARIATIONS IN THE EC. FLOW. THIS IS NOT (UP TO 30%). THIS IS NOT ACCOMPANIED BY CORRESPONDING CHANGES IN P-EC (PRESSURE) AS WOULD BE EXPECTED. IS THE DELAY CHANGING?

ALSO NOTE - LATENT HEAT FLUX FROM K<sub>2</sub> H<sub>2</sub>O IS ALMOST ALWAYS LARGER THAN FROM THE TRGA ⇒ IS THERE A DELAY PROBLEM IN THE TRGA?

DIFFICULTIES - NOT MUCH FLUX - NONE AT ALL FOR CO<sub>2</sub>!!  
 NONE FOR H<sub>2</sub>O AT NIGHT WHICH IS WHEN MOST OF THE FLUX PERTURBATIONS OCCUR.

⇒ FROM ABOVE - ONLY MAJOR CHANGE IN DELAY IS ON DEC 9<sup>TH</sup>. DON'T KNOW WHY? BUT THIS TIME PERIOD IS WHEN LIGGGZ REALLY MISSES THE LE FLUX!!

4/6/99

FROM DOING TESTS W/ CALIBRACES, I REALIZED THAT  
NOW I HAVE BEEN APPLYING LOGS IS INCORRECT!!

→ HAVE NOW CHANGED THE CODE <sup>FLUXES</sup> SO THAT  
THE LOGS ARE NOW APPLIED PROPERLY!!

NEW FLUX DATA NEEDS TO BE RECALCULATED!!

7/19/98 - TRIED RE-CALIBRATING AT/ SONIC

BUT - SONIC DIED INSTEAD

Ⓢ PUT ON NEW  $\phi$  AIR (~12:00 PM)

$\phi$  AIR HAD RUN OUT OVER WEEK-END - DATA MAY  
BE BAD

4/20/99 - FROM 11:50 → 1:00 H<sub>2</sub>O CO<sub>2</sub> INLET  
DOWN & TRIED MEASURING DELAY AS A  
FUNCTION OF FLOW RATE

FEED SOLENOID VALVE SIGNAL INTO  
23<sub>2</sub>, FAN DATA, CHANNEL #8 (Re-inflow)  
3, INITIAL ON/OFF'S AS A TEST

| Flow | Time  | # of on/off's | $\phi$ (V) | Ⓢ PROBLEM                 |
|------|-------|---------------|------------|---------------------------|
| 8.19 | 58.13 | 2             | ~ -700     | w/ CO <sub>2</sub> pulses |
| 7.28 | 52.08 | 5             | -451       | from my                   |
| 6.57 | 54.9  | 5             | -267       | BREATHER!!                |
| 5.62 | 57.99 | 5             | -64        |                           |
| 4.62 | 60.78 | 5             | 132        |                           |
| 3.39 | 64.09 | 5             | 337        |                           |
| 7.89 | 49.29 | 5             | -638       |                           |



USING SCOTT TANK C  
345.4 ppm

4/27/99  
New CO<sub>2</sub> STD. - from US.W #1

| #1 | <u>RUN</u> | <u>ZERO</u>     | <u>SPAN</u> | <u>SAMPLE</u> |
|----|------------|-----------------|-------------|---------------|
|    | <u>0</u>   | <del>0.00</del> |             |               |
| 1  | 0.08       | 0.08            | 345.5       | 506.6         |
| 2  | 0.02       | 0.02            | 345.45      | 505.45        |
| 3  | 0.15       | 0.15            | 345.44      | 505.9         |
| 4  | 0.01       | 0.01            | 345.34      | 505.26        |
| 5  | 0.08       | 0.08            | 345.4       | 505.64        |
| 6  | 0.06       | 0.06            | 345.48      | 505.88        |
| 7  |            |                 |             |               |

505.9 ± 0.8 ppm  
(202)

PUT NEW CO<sub>2</sub> STD CN - OLD ONE  
WAS EMPTY

— MANUAL CALIBRATION OF EC SYSTEM

- PROFILER - FLOW METER PORTION OF CONTROLLER  
SEEMS HOSID - BUT PRESSURE IS CONSTANT  
⑤ IT IS CONTROLLING FLOW  
⑥ FROM PUMP → MFC, H<sub>2</sub>O IS CONDENSING  
IN HIGH PRESSURE REGION!!

MANUAL CALIBRATION

$$T = 15.80^{\circ}\text{C}$$

$$P = 680 \text{ mV} \Rightarrow 69.38 \text{ kPa}$$

$$C_0 = 505.9 \text{ ppm}$$

$$\frac{C_0 T_0}{T} = 540.9 \text{ ppm}$$

$$V \frac{P_0}{P} = 2603.8$$

ZERO = 0.016 = 0.000

P = 685 → 69.38 kPa

V<sub>std</sub> = 1785.3 mV

READ

- NO FLOW CONTROLLER IS LOOKING DEAD
- RE: A RESTRICTION VALUE CN - CHECK EACH LINE SEPARATELY

|    | <u>P (MM)</u> |
|----|---------------|
| L1 | 602           |
| L2 | 594           |
| L3 | 598           |
| L4 | 596/7         |
| L5 | 613           |
| L6 | 601           |

THESE LOOK OK - NOW TRY TO 0 & SPAN !!

ZERO:

$$\text{SET } 0 \Rightarrow 0.000$$

$$\frac{P}{P} = 18.67^\circ$$

$$\frac{P}{SP} = 605$$

$$535.6 \Rightarrow$$

$$\frac{V P_0}{P} = 2585.5$$

$$V_{\text{CALC}} = 1741.5$$

$$V_{\text{MEAS}} = 1780$$

MOVE IT BACK

$$\frac{535}{10} = 1742$$

PROCESS OPERATIONAL AT ~~14:30~~ 14:30

5/3/99  $\Rightarrow$  QUACKER DOWN ON 4/30  $\rightarrow$  20:00  
(POWER OUTAGE)

BACK ON AT 22:30,

ALSO  $\Rightarrow$  K- HYDROMETER BACK UP & RUNNING !!

VOLTAGE IS VERY HIGH !!

$\rightarrow$  NO VENTILATOR RUNNING ON REBS @ 7.1

5/7/99 New ZERO TANK  
 COSING UHP  $N_2$  - 1000 psi  
 ~ 11:45

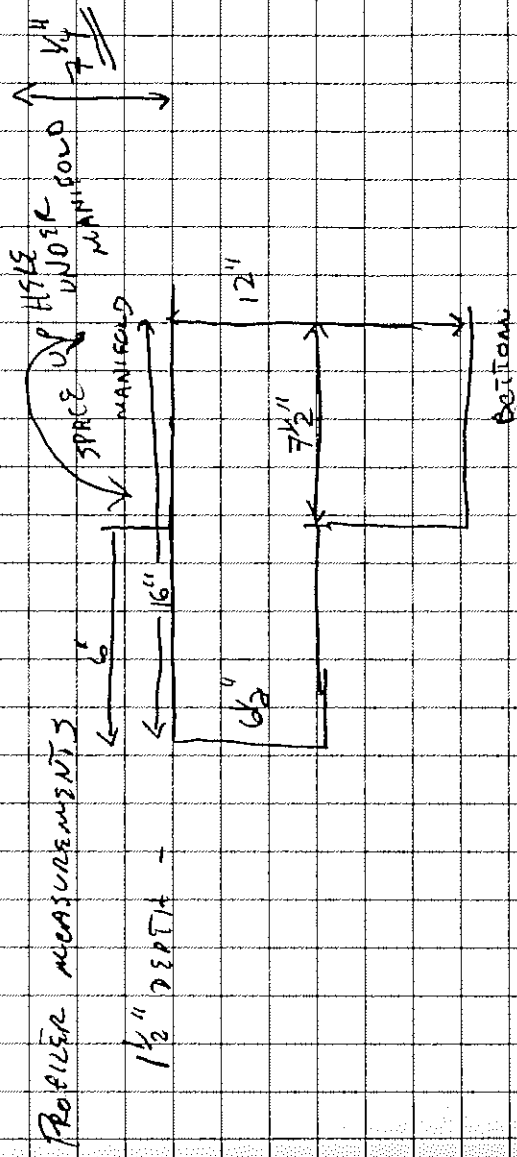

5/11/99

MANUAL  $\phi$  & SPAN OF EC SYSTEM  
 1:03 PM - 1:08 PM

ZERO  $\Rightarrow$  OCE BY 4:40 PM

SPAN  $\Rightarrow$  OCE BY 2:00 PM

(TANK WAS READING 3810 PM AT START  
 371 AFTER)

$\phi$  & SPAN THE PROFILER

MANUAL  
 SPAN SWITCH  
 WAS ON

563 mV  
 $\phi = P(1)$

$\phi = -0.003$  (OK)

SPAN =  $P = 553$  67.434

$P/P_0 = 0.66569$

$T = 13.38$   
 $T/T_0 = 0.92743$   
 $C(T_0) = 545.49$

$V/P = 26.195$

$V_{ECC} = 1743.8$

$V_{meas} = 1741$   
 SET TO 1743

DONE: 1:18

DOESNT  
 MATTER  
 CANNOT  
 SWITCH  
 15 MIN  
 "AUTO"

AT 2:15 ATI SONIC ~~AT~~ REMAINING AT 21m (NEXT TO THE CAMPBELL)

5/16 - First - GFC AT 11:45 AM  
 BACK ON AT 3:10 PM, 2ND RUNNIN' AT  
 SAME HEIGHT!!  
 → DL; CHANNEL 2

5/16/89 - Looking At  $O_2$  FLOW DATA +  $CO_2$  MIXING RATIO  
 IT APPEARS SOMETHING IS WRONG JUST AFTER THE CALIBRATION  
 OCCURS. SIGNAL DROPS ABOUT 2-3 ppm THEN RECOVERS  
 ABOUT 10 MINUTES LATER!!  
 IS THERE A LEAK THRU THE VALVES??

I DON'T THINK IT'S A PROGRAMMING OR PROBLEM (CHANGING  
 CAL - COEFFICIENTS)

↳ THESE DON'T CHANGE SLOWLY

ALSO - PRESSURE DOESN'T STABILIZE WHEN DRAINING ZERO SPAN

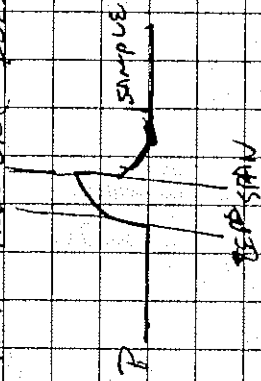

Run #1 ⇒ Run 22m → 096333  
 Run #2 ⇒ Run 2 ⇒ 0



5/25/99 MARR ATU SERVICE 18.5 m (12:30pm)  
CLEAN K+ H2O2 WATER OPTICS

5/26/99 CNR-1 RUNNING (4:00pm)  
CHANGED VALVE 11 EC SYSTEM (MOVED CLOSE TO 3-WAY  
SAMPLE/CALIBRATE VALVE)

\* ALSO NEW "LIGRECS"  $\Rightarrow$  OUTPUT STATUS DIRECTLY

5/27/99 - CHANGED PREP. CONFG & CHANNEL CONFIG  
TO LOOK FOR EXTRA DATA CHANNEL coming from  
"LIGHT.CS"

6-7/98 BACK from VACATION

$\rightarrow$  PUT ON NEW VAP N<sub>2</sub> ON REC CELLS  
(DURING LAST WEEK TOO PUT ON THE EMERGENCY  
N<sub>2</sub> CYLINDER)

NEW CO<sub>2</sub> STD

| RUN | READ  |
|-----|-------|
| 1   | 0.05  |
| 2   | 0.02  |
| 3   | 0.04  |
| 4   | 0.10  |
| 5   | 0.03  |
| 6   | -0.07 |
| 7   | 0.00  |

SPAN  
345.46  
345.49  
345.32  
345.30  
345.5  
345.5  
345.5

SCOT TANK C  
345.4 ppm

TANK  
~~345.4~~ 350.28  
350.58  
350.21  
351.21  
351.03  
351.26  
350.7 / 351.6

NEW BAL TANK - 2:30

MAN CAL. OF EC SYSTEM

PREPARED OFF AT 2:45 PM

350.95 ppm  
 $\pm$  0.44 (1 $\sigma$ )



AUG - GROUNDING BOXES + TOWER UP TO LEVEL W/ CAMPBELL  
SONIC.

NEED A PAINT SCRAPER !!

6/9/99

FINISHED GROUNDING BOXES ALONG TOWER

REPLACING PROXIER IRGA W/ HCAR 6202

FIRST -  $P_{cell} = 648 \text{ mV} - 650$

SHUT OFF AT 11:15

(X) NO PRESSURE SENSOR

(B) CHANGE MKS SENSOR FROM EC TO PROXIER  
(T) P. PROF = H2O. PROF

(H2O CHANNEL IS NOW WHERE  
PRESSURE USED TO BE)

CO<sub>2</sub> COEFFICIENTS

$$T_0 = 35.79$$

$$K = 19312$$

$$A = 0.1525$$

$$B = 1.0285 \times 10^{-5}$$

$$C = 6.9009 \times 10^{-9}$$

$$D = -9.8797 \times 10^{-13}$$

$$E = 6.4768 \times 10^{-17}$$

H2O COEFF

$$T_0 = 41.21$$

$$K = 16479$$

$$A = 0.006481$$

$$B = 3.0842 \times 10^{-6}$$

$$C = -1.264 \times 10^{-11}$$

6/11/99

DID SOME REPLUMBING ON PROFLER

- (1) PLUGGED PUMP INTO DIFFERENT CIRCUIT (at BOTTOM OF TOWER)
- (2) PUT NEEDLE VALVE BETWEEN THE IRGA & THE PUMP (IT WAS DOWNSTREAM OF THE PUMP)
- (3) SET THE FLOWS

SAMPLE FLOW = 150 ml/min

TOTAL FLOW = SAMPLE + PROC. REC + EC REC = ~~3~~ 310 ml/min

WILL WATCH - CIRCUIT BREAKER HAS BEEN POPPING ALST DID (1) & (2) TO TRY & RELIEVE STRESS ON THE PUMP & ALSO SO IRGAS ARE ON SEPARATE CIRCUIT FROM THE PROFLER PUMP.

⇒ MOVED SONIC FROM 18.5 METERS TO 14.5 METERS  
(PROBABLY AS LOW AS IT WILL GO)

EVERYTHING RUNNING AGAIN AT 11:00 AM

6/15/99 CHANGED DESSICANT ON PROFLER  
CHECKING TENSION ON GUYS.

|   | NE          | SE           | SW           | NW          |
|---|-------------|--------------|--------------|-------------|
| 1 | 600<br>(OK) | 580<br>(600) | 550<br>(600) | 600<br>(OK) |
| 2 | 600 ✓       | 600<br>(OK)  | 540<br>(600) | 600 ✓       |
| 3 | 600 ✓       | 525<br>(600) | 500<br>(600) | 600 ✓       |
| 4 | 600 ✓       | 450<br>(600) | 530<br>(600) | 600 ✓       |



6/16/99 New LIGHT4.CSI

WIRING DIAGRAM

DISCONNECT  
25105

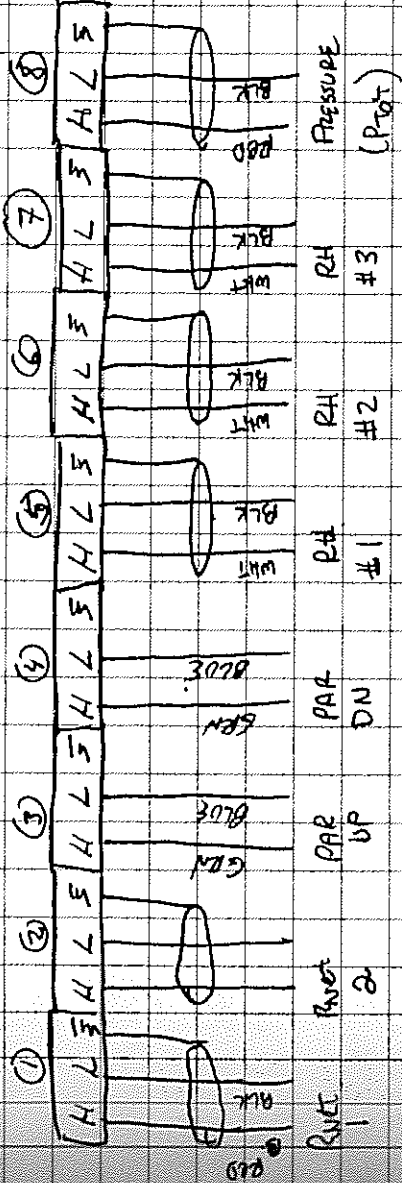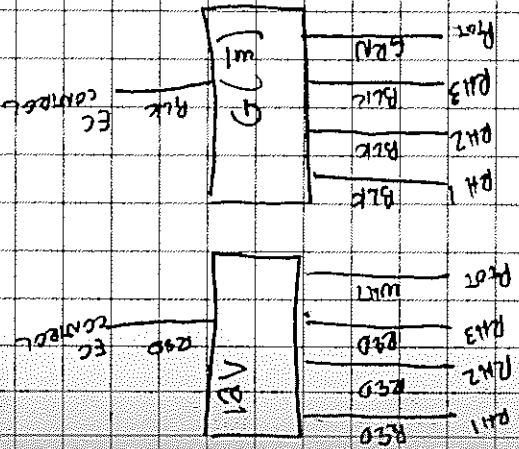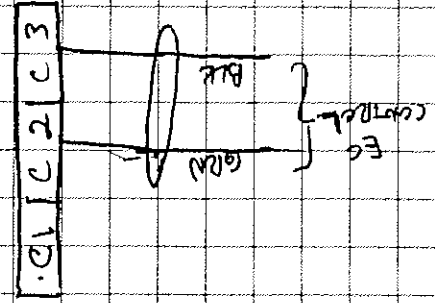

6/21/99 - MOVED NET RN TO OTHER SIDE OF TOWER

(IS OVER SENSITIVE - COULD BE A PROBLEM?)

REWIRED LIGHT 21x -> ALSO CHANGED DEEP.COUNT.C

ACCORDING - CHANNELS ~~WAS~~ ARE

WIRED AS ABOVE.

STATUS. EC IS NOW OUTPUT DIRECTLY - NOT MEASURED

AS A DRE CHANNEL

PROGRAM NAME = LIGHT2.CSI

UNPLUGGED AUTOCALIBRATIONS.!!  
ON EC SYSTEM

6/22/99

(7)

UPDATES PROF23X TO OUTPUT STATUS DIRECTLY & NOT  
USE A DIFF. CHANNEL

6/23/99

- (1) 3:00 PM - MOVED AT1 SENS TO 16m
- (2) MOVED 18m RH/T SENS TO 21.5m (NEAR TO SONIC)

(\*) GOT EXACT  
HEIGHT

- 6/24/99
- (1) GOT PAR SENSORS RUNNING; NOT REALLY RUNNING UNTIL ~3:45PM
  - (2) Repumper Repair;

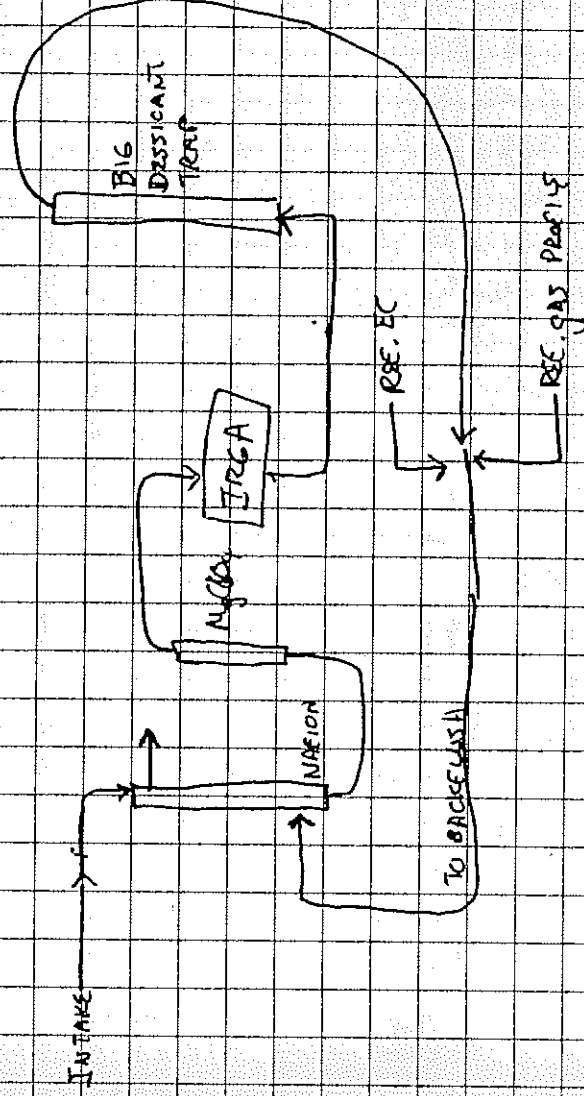

(\*) NOTE ON PAR SENSORS

WRITE DOWN CALIBRATIONS - WHICH ONE IS UP/DOWN

(\*) STARTED EC AUTO CALIBRATIONS AGAIN

6/24/99 at ~ 8:00

928512000

6/28/89: TO HOOK UP LEAF WEENESS SENSOR?

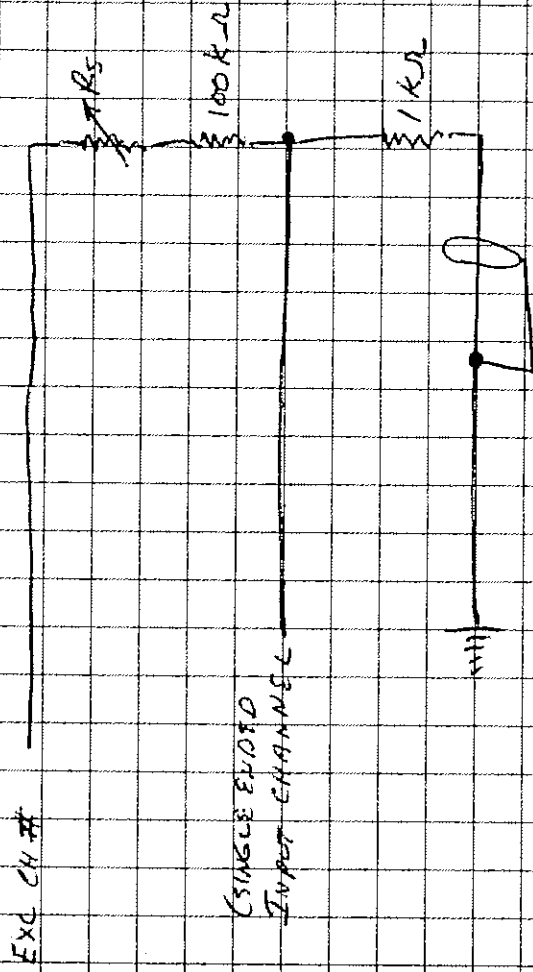

6/29/89

- HOOKED UP O<sub>3</sub> (TEND) RUNNING ON PREPARED CHANNEL ALSO  
(AT 9:50 ON 6/30 → CHANGED PREP. CONFIG & CHANGED CONFIG  
TO REFLECT O<sub>3</sub> MEASUREMENT)
- ALSO SWITCHED OUT 6868 IN PREPARED NOW BACK  
TO OUR 6251 (IIGA #388, I THINK). IT IS THE  
SAME ONE AS BEFORE
- ALSO DUG UP HEAT FLUX PLATES & REBURIED NEAR  
CANOPY ACCESS TOWERS (JENNIFER - SEE NEXT PAGE!)
- (\*) SWITCH OUT GAIR, DO I HAVE A LEAK - SHOULD NOT HAVE  
RUN OUT SO QUICKLY

## HEAT FLOW PLACES

| Serial # | CF Top   | Runs | Direction         | TDR#      |
|----------|----------|------|-------------------|-----------|
| H973073  | 46.9     | 1    | <u>SOUTH</u>      | <u>56</u> |
| H973074  | 44.7     | 2    |                   |           |
| H973076  | 45.7     | 3    | <u>EAST</u>       | 42        |
| H963432  | 40.6     | 4    |                   |           |
| H963436  | 40.3     | 5    | <u>North</u>      | 48        |
| H973078  | 45.3     | 6    |                   |           |
| H963430  | 44.6     | 7    | <u>North West</u> | 47        |
| H973075  | 59.3 (?) | 8    |                   |           |
| H973079  | 46.4     | 9    | <u>West</u>       | 43        |
| H973077  | 46.1     | 10   |                   |           |
| STP96020 |          | 11   | <u>SOUTH</u>      |           |
| STP96018 |          | 12   | <u>EAST</u>       |           |
| STP96019 |          | 13   | <u>North</u>      |           |
| STP96052 |          | 14   | <u>NW</u>         |           |
|          |          | 15   | <u>West</u>       |           |
|          |          |      | IN CLEARINGS      |           |

## TROPIC FLOWS

SAMPLE FLOW = 150 ml/min

PRESSURE REG = 108 ml/min

EC REG = 65 ml/min

COULD NOT FIND ANY LEAKS IN PERIMETER OF EC SYSTEM - KEEP AN EYE ON TANK PRESSURE

LOOK FOR FLOW  
DRAIN PROBLEM  
1 IN  
APR 25 1974  
APR 26 1974  
APR 27 1974  
APR 28 1974  
APR 29 1974  
APR 30 1974  
MAY 1 1974  
MAY 2 1974  
MAY 3 1974  
MAY 4 1974  
MAY 5 1974  
MAY 6 1974  
MAY 7 1974  
MAY 8 1974  
MAY 9 1974  
MAY 10 1974  
MAY 11 1974  
MAY 12 1974  
MAY 13 1974  
MAY 14 1974  
MAY 15 1974  
MAY 16 1974  
MAY 17 1974  
MAY 18 1974  
MAY 19 1974  
MAY 20 1974  
MAY 21 1974  
MAY 22 1974  
MAY 23 1974  
MAY 24 1974  
MAY 25 1974  
MAY 26 1974  
MAY 27 1974  
MAY 28 1974  
MAY 29 1974  
MAY 30 1974  
MAY 31 1974  
JUN 1 1974  
JUN 2 1974  
JUN 3 1974  
JUN 4 1974  
JUN 5 1974  
JUN 6 1974  
JUN 7 1974  
JUN 8 1974  
JUN 9 1974  
JUN 10 1974  
JUN 11 1974  
JUN 12 1974  
JUN 13 1974  
JUN 14 1974  
JUN 15 1974  
JUN 16 1974  
JUN 17 1974  
JUN 18 1974  
JUN 19 1974  
JUN 20 1974  
JUN 21 1974  
JUN 22 1974  
JUN 23 1974  
JUN 24 1974  
JUN 25 1974  
JUN 26 1974  
JUN 27 1974  
JUN 28 1974  
JUN 29 1974  
JUN 30 1974  
JUN 31 1974  
JUL 1 1974  
JUL 2 1974  
JUL 3 1974  
JUL 4 1974  
JUL 5 1974  
JUL 6 1974  
JUL 7 1974  
JUL 8 1974  
JUL 9 1974  
JUL 10 1974  
JUL 11 1974  
JUL 12 1974  
JUL 13 1974  
JUL 14 1974  
JUL 15 1974  
JUL 16 1974  
JUL 17 1974  
JUL 18 1974  
JUL 19 1974  
JUL 20 1974  
JUL 21 1974  
JUL 22 1974  
JUL 23 1974  
JUL 24 1974  
JUL 25 1974  
JUL 26 1974  
JUL 27 1974  
JUL 28 1974  
JUL 29 1974  
JUL 30 1974  
JUL 31 1974  
AUG 1 1974  
AUG 2 1974  
AUG 3 1974  
AUG 4 1974  
AUG 5 1974  
AUG 6 1974  
AUG 7 1974  
AUG 8 1974  
AUG 9 1974  
AUG 10 1974  
AUG 11 1974  
AUG 12 1974  
AUG 13 1974  
AUG 14 1974  
AUG 15 1974  
AUG 16 1974  
AUG 17 1974  
AUG 18 1974  
AUG 19 1974  
AUG 20 1974  
AUG 21 1974  
AUG 22 1974  
AUG 23 1974  
AUG 24 1974  
AUG 25 1974  
AUG 26 1974  
AUG 27 1974  
AUG 28 1974  
AUG 29 1974  
AUG 30 1974  
AUG 31 1974  
SEP 1 1974  
SEP 2 1974  
SEP 3 1974  
SEP 4 1974  
SEP 5 1974  
SEP 6 1974  
SEP 7 1974  
SEP 8 1974  
SEP 9 1974  
SEP 10 1974  
SEP 11 1974  
SEP 12 1974  
SEP 13 1974  
SEP 14 1974  
SEP 15 1974  
SEP 16 1974  
SEP 17 1974  
SEP 18 1974  
SEP 19 1974  
SEP 20 1974  
SEP 21 1974  
SEP 22 1974  
SEP 23 1974  
SEP 24 1974  
SEP 25 1974  
SEP 26 1974  
SEP 27 1974  
SEP 28 1974  
SEP 29 1974  
SEP 30 1974  
SEP 31 1974  
OCT 1 1974  
OCT 2 1974  
OCT 3 1974  
OCT 4 1974  
OCT 5 1974  
OCT 6 1974  
OCT 7 1974  
OCT 8 1974  
OCT 9 1974  
OCT 10 1974  
OCT 11 1974  
OCT 12 1974  
OCT 13 1974  
OCT 14 1974  
OCT 15 1974  
OCT 16 1974  
OCT 17 1974  
OCT 18 1974  
OCT 19 1974  
OCT 20 1974  
OCT 21 1974  
OCT 22 1974  
OCT 23 1974  
OCT 24 1974  
OCT 25 1974  
OCT 26 1974  
OCT 27 1974  
OCT 28 1974  
OCT 29 1974  
OCT 30 1974  
OCT 31 1974  
NOV 1 1974  
NOV 2 1974  
NOV 3 1974  
NOV 4 1974  
NOV 5 1974  
NOV 6 1974  
NOV 7 1974  
NOV 8 1974  
NOV 9 1974  
NOV 10 1974  
NOV 11 1974  
NOV 12 1974  
NOV 13 1974  
NOV 14 1974  
NOV 15 1974  
NOV 16 1974  
NOV 17 1974  
NOV 18 1974  
NOV 19 1974  
NOV 20 1974  
NOV 21 1974  
NOV 22 1974  
NOV 23 1974  
NOV 24 1974  
NOV 25 1974  
NOV 26 1974  
NOV 27 1974  
NOV 28 1974  
NOV 29 1974  
NOV 30 1974  
NOV 31 1974  
DEC 1 1974  
DEC 2 1974  
DEC 3 1974  
DEC 4 1974  
DEC 5 1974  
DEC 6 1974  
DEC 7 1974  
DEC 8 1974  
DEC 9 1974  
DEC 10 1974  
DEC 11 1974  
DEC 12 1974  
DEC 13 1974  
DEC 14 1974  
DEC 15 1974  
DEC 16 1974  
DEC 17 1974  
DEC 18 1974  
DEC 19 1974  
DEC 20 1974  
DEC 21 1974  
DEC 22 1974  
DEC 23 1974  
DEC 24 1974  
DEC 25 1974  
DEC 26 1974  
DEC 27 1974  
DEC 28 1974  
DEC 29 1974  
DEC 30 1974  
DEC 31 1974



6/30/99

New  $PO_2$  STD.

SCOTT TANK 345.4 ppm

| RUN | $\Delta$ |
|-----|----------|
| 1   | -0.016   |
| 2   | 0.100    |
| 3   | 0.03     |
| 4   | -0.130   |
| 5   | -0.025   |
| 6   | -0.05    |

| SPAN      |
|-----------|
| 345.5 ppm |
| 345.4 ppm |
| 345.4     |
| 345.3     |
| 345.3     |
| 345.5     |

| SAMPLE |
|--------|
| 359.95 |
| 360.37 |
| 360.24 |
| 360.17 |
| 360.33 |
| 360.3  |

$$360.2 \pm 0.15 (1\sigma)$$

PUT ON AT ~ 12:00 PM

MANUAL CAL. OF ~~PROCESS~~ SYSTEM // 12:15

$$\text{SAMPLE } P = 0.627 \text{ V} \Rightarrow 68.569 \text{ kPa}$$

$$\text{SET SPAN PRESSURE} \Rightarrow 0.627$$

$$C_{\text{CAL}} = 360.2 \text{ ppm}$$

$$T = 31.26^\circ\text{C}$$

$$T/T_0 = 0.98511$$

$$C \frac{T_0}{T} = 365.64$$

$$V \frac{P_0}{P} = 1949$$

$$V_{\text{CALC}} = 1319 \text{ mL}$$

$$V_{\text{SPAN}} \Rightarrow 0.0035 \Rightarrow \text{SET TO } 0.001$$

$$V_{\text{SPAN}} \Rightarrow 1318 \Rightarrow \text{OK} \checkmark$$

BACK ON-LINE AT 12:25 PM



PIC UP LEAF WETNESS SENSOR ON LEVEL 8

hooked to PROBEUSER DATA LOGGTR, USING A SINGLE ENDED CHANNEL

NEW PROGRAM IN PROBEUSER - CALLED PROB23K8.CS

MEASURES: 5 ANALOG DIFF. VOLTAGES

LEAF WETNESS SENSOR

3 TEMP. (PETS, VARIOLA)

7/2/99

EL 6262 SCREWED UP AROUND 12:00 Noon  
VOLTAGES ALL DROPPED BY ~ 200mV or more

- WHEN I GOT OUT TO TOWER - VOLTAGES WERE OK BUT  
KEYPAD WAS LOCKED. (LOOKED LIKE STARTUP SCREEN!)

CYCLE POWER OFF/ON - GAVE NOTHING BUT ZEROS  
(VOLTAGES LOCKED OK - BUT KEYPAD WAS  
LOCKED!)

REPLACED UP 6251 => IREGA #308

(\*) NOTE - STILL BAD ON CT HOME LATER THAT NIGHT!

7/6/99 (AFTER LONG WEEK-END)

Now hook up IREGA IN OFFICE & EVERYTHING SEEMS  
FINE

(22112?)

DON'T UNDERSTAND WHY!!

7/7/89 ① DOWNLOADED CNR DATA

— PROGRAM ERROR — NO DATES OR TIMES ??

② TRIED HOOKING UP TO THE DUCK

③ TOOK DOWN ROV #2  
MOVED ROV #1 ~~TO~~ TO THE LEVEL OF  
THE SONIC.④ CHANGED SCALE ON O<sub>2</sub> SENSOR  
FULL SCALE = 400 ppmCO<sub>2</sub> ~~ROV~~ ROV 0.15 9  
BLK SIG. GND 8TEMP ~~ROV~~ TEMP 50 13  
BLK SIG. GND 14PRESS. ~~ROV~~ AUX 15  
BLK SIG. GND 14H<sub>2</sub>O ~~ROV~~ H<sub>2</sub>O 0.15 11  
BLK SIG. GND 8

① SWITCH BACK TO 6262 (IRGA #638) =&gt;

OK! ~ 2:30 - ON ~ 3:15

② CHANGED O<sub>2</sub> SENSOR RANGE

0-500 ppm =&gt; 0-10 V

③ STARTED LOGGING DATA FROM 2<sup>ND</sup> BLANKETS DATA LOGGER !!  
(~ 2:30 PM) (~ 3:00 PM)④ MOVED RP TWO CO<sub>2</sub> INLET LINES TO

#5 =&gt; 12 METERS

#6 =&gt; 21.5 METERS (~ 3:00 PM)



7/9/99

PAP CAL #5

UP: MULTI: -178.3  
 FCOFF = 0.0036  
 SERIAL # 023139  $\Rightarrow$  CAL CONSTANT = 5.61  
 DNT: MULTI: -177.0  
 FCOFF = 0.0036  
 SERIAL # 022793  $\Rightarrow$  CAL CONSTANT = 5.65

UNITS  
mmol  $5^{-1}$   $m^{-2}$ MANUAL CAL. OF PROVIDED

TEMP OFF:

P<sub>SPAN</sub> = 711 uVC<sub>SPAN</sub> = 360.2

T = 24.8°C

T<sub>T0</sub> = 0.9644
$$C \frac{T_0}{T} = 373.5 \text{ ppm}$$

$$\rightarrow V \frac{T_0}{P} = 1981 \text{ (1980.8)}$$

ZERO: OK

SPAN P = 713 uV 69.887 kPa

P/P<sub>0</sub> = 0.6889
$$V_{CALC} = 1367$$

[ VASAKA TEMP PRT = CALIBRATION = EACH PUT ICE/WATER

R<sub>S</sub>-R<sub>01</sub> = 1.0007  $\Rightarrow$  MULTI = R<sub>S</sub>-R<sub>01</sub>R<sub>S</sub>-R<sub>02</sub> = ~~1.0003~~ 1.0013  $\Rightarrow$  " "R<sub>S</sub>-R<sub>03</sub> = ~~1.0003~~ 1.0033  $\Rightarrow$  " "

Russ Morrison

M-CARD

5405 - 0138 - 0502 - 1717

SXP 11/00

ON FOREST DATA LOGGERSTOWER B (246)

1-74 → Root Tc  
 5-77 → SARPWOOD  
 8-710 → HEARTWOOD

TOWER A (3110)

1-75 → Root  
 6-710 → SARPWOOD  
 11-715 → HEARTWOOD

HEAT FLUX DATA

HFT 1-710  
 RTD 1-75  
 STD-HFT 1-710

wires

CD2 Red 1  
 Black 2  
 Temp R 7  
 B 8  
 R P 13  
 B per 14

upper left - black from white powder  
 lower left - clear from IT  
 lower right - clear black cross  
 upper right - clear to small

7/20 → THUNDERSTORM KNOCKED 6262 (EC SYSTEM) ON PREVIOUS DAY.

AFTERNOON - SWITCHED OUT THE 6262 FOR IRGA 368, 6251 (PROBILER IRGA)

AS ALSO - AT ABOUT 4:30 - FIGURED OUT WHY TRAIN GAGE WASN'T WORKING - SCREWED UP WHEN I CHANGED PREP. CONFIG, CHANNEL-CONFIG. → CORRECTED THIS & IT SEEMS TO BE WORKING.

7/21 WILL NEED TO SEND 6262 TO LICEE WITH PUT IN 6251, IRGA 308 IN PROBILER FOR THE TIME BEING.

(TALK TO PETER ABOUT USING 6262 w/ P-SENSOR IN IT.)

7/22/97 PUTTING IRGA #308 IN PROBILER

BACKFLUSH FLOWS - FROM EC SYSTEM = 56 ml/min  
FROM PROB. RES. = 1030 ml/min  
SAMPLE FLOW = 149 ml/min

HOOKED UP  $F_{TOT}$  = 245 ml/min (FOR CON.)  
TURNED UP SAMPLE FLOW TIL  $F_{TOT}$  = 285

THEN PROB. RES. FLOW TIL  $F_{TOT}$  = 304 ml/min

TURNED ON AT 11:38 AM

ⓧ MANUAL ZERO / SPAN OF EC SYSTEM?

SAMPLING:

$$T = 28.18^{\circ}\text{C}$$

$$P = -700 \text{ mV} \Rightarrow 48.226$$

ZERO IS OK

-792

$$\Rightarrow 46.693$$

$$C_{O_2} = 360.2 \text{ ppm}$$

$$T_{10} = 0.97534$$

$$C_{T_0} = 369.31$$

$$1960 + 4.1 \Rightarrow 1964$$

$$V_{\text{calc}} = \frac{P_{O_2}}{P} = 1964$$

$$U_{\text{calc}} = 935 \text{ mV}$$

$$U_{\text{calc}} = 905$$

$$P = -775 \quad 47.076$$

$$U_{\text{calc}} = 913 \text{ mV}$$

BACK ON AT 12:30 PM

ⓧ MANUAL  $\phi$  A SPAN OF ANALYZER

$$T = 27.32$$

$$P_{\text{HAPPE}} = 688 \text{ mV} \Rightarrow$$

$$C = 360.2 \text{ ppm}$$

$$C_{T_0} = 369.47$$

ZERO = 0.063 (WHAT IT WAS IN THE LAB...)

$$2020 + 5.3 = 2025 \text{ mV}$$

$$P_{\text{SPAN}} = 696 \text{ mV} \Rightarrow 69.47$$

$$P/P_{O_2} = 0.68578$$

$$U_{\text{calc}} = 1389 \text{ mV} \quad (\text{READS } 1448)$$

$$1389 + 60 = 1451$$

SET TO 1451

ON AGAIN AT 1240



(\*) ALSO MOVED 4m PROBE INLET TO OTHER  
SIDE OF TOWER. IT WAS TOO CLOSE TO SOME  
TREE BRANCHES - BELIEVE I AM GETTING TOO HIGH  
CO<sub>2</sub> VALUES. BECAUSE OF THIS.

7/28/99 -

MOVED RESS Q<sup>7.1</sup> TO TOP; IS RUNNING AS WELL!!

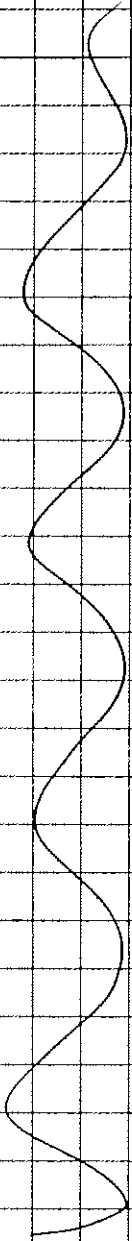

8/1/99

NEW CAL TANK

C<sub>span</sub> = 345.4 ppm

| RUN | DEMO                   | SPAN   | SAMPLE                                     |
|-----|------------------------|--------|--------------------------------------------|
| 1   | .331 <del>ANALOG</del> | 345.48 | 337.76                                     |
| 2   | .372                   | 345.45 | 337.76                                     |
| 3   | .396                   | 345.37 | 337.80                                     |
| 4   | .392                   | 345.37 | 337.40 <del>337.40</del> <del>337.50</del> |
| 5   | .400 .420              | 345.50 | 337.80                                     |
| 6   | .320                   | 345.44 | 337.80                                     |
| 7   | .392                   | 346.22 | 337.82                                     |
| 8   | <del>.392</del>        |        |                                            |

#5 - 6094/YELLOW - CG UP (LW) LW.1  
#6 - 8041/GAN - CG DOWN (LW) LW.2

Heater

HEATER UP NR LITE NET RADIOMETER - POINTING SE  
ON SECOND HIGHEST LEVEL (COULD GET SHADOWED BY  
OTHERS LATE IN DAY!!)

8/3/99 - New  $\phi$  AIR

(\*) Rk AT 2m was not working yesterday  
 $\rightarrow$  looks like it got  $H_2O$  inside the  
 connector. Dried it out - put new RTV  
 on it & it seems to be working now.

(\*) CHANGED  $NO_2$  IN profiler.

(\*) CLEANED  $K_2$  HYDROMETER.

8/10/99  $\Rightarrow$  RAN OUT OF  $\phi$  AIR SINCE YESTERDAY

(\*) SWITCHED BACK TO IRGA 638 (6262)  
 IN  $EC$  SYSTEM  
 NOTE = NEW CALIBRATION!!

ON  $\sim$  11:00 AM

ALSO - Jen's  $CO_2$  STD. CALIBRATION IS WRONG!!  
MUST REDO!!

New  $\phi$  AIR  $\Rightarrow$  profiler flow was too high (TURNED DOWN)  
 (\*) need to RECYCLE FLOW ON profiler IRGA

(\*) AUTOCALIBRATIONS HAVEN'T BEEN WORKING SINCE  
 8/6/99 (AT LEAST)

MANAGE SINCE 8/3/99

## DECARBATING

## TUNNELER'S TANK

SCOTIA  
CON = 345.4 ppm

| K |        | SPAN   | SAMPLE                   |
|---|--------|--------|--------------------------|
|   |        |        |                          |
| 1 | 0.334  | 345.73 | <del>359.73</del> 360.16 |
| 2 | 0.285  | 345.37 | 359.50                   |
| 3 | 0.088  | 345.48 | 359.56                   |
| 4 | 0.015  | 345.46 | 359.70                   |
| 5 | -0.032 | 345.30 | 359.68                   |
| 6 | 0.065  | 345.38 | 359.75                   |

359.7 ppm  
± 0.23 ppm (1σ)

- AUTOCAL RUNNING AT 12:10 PM W/ OLD TANK (360.2 ppm)
- PUT NEW TANK ON AT ~4:15 PM
- TURNED ON PROFILER & TECO

(\*) I KNOW WHY AIR WAS TOO HIGH IN PROFILER  
FITTING ON EC SYSTEM WAS TAPPED OFF → NO FLOW (N<sub>2</sub>)  
FROM THIS SYSTEM + IT GAVE AN OUTLET OTHER THAN  
THE ~~MAIN~~ JUNE/KOMANETER; DRYER APPARENTLY HADN'T  
BEEN WORKING TOO WELL!!

8/12/99

AUTO CALIBRATIONS STILL SCREWED UP -  
NOT ENOUGH PRESSURE ON REGULATOR  
W/ NEW TANK

PROFILER HAS BEEN OFF FOR ~24 HRS - SWITCHED  
+ PUT IRGA #388 BACK INTO PROFILER  
RUNNING AGAIN AT ~10:00 AM

SA - CHANGED MOLSIEVE ON PROFILER (OFF-LINE - 10:22)  
 " " FILTER ON PROFILER

- MANUAL  $\phi$  & SPAN  
 $P_{\text{span}} = 710 \text{ mV}$

$C_{\text{span}} = 359.7 \text{ ppm}$   
 $T = 27.1^\circ\text{C}$   
 $T_{\text{FA}} = 0.97799$   
 $C_{\text{FA}} = 367.167$   
 $P_{\text{FA}} = 1955$

PROFILER UNISTEUT -

13' : 62" LONG  
 NEED 50" LONG

RAN GAUGE  
 TS : 308"

PROF DATA LOGGER  
 TS : 54"  
 NEEDS : 40"

$T = 27.1$   
 $T_{\text{FA}} = 0.9778$

~~TEST FOR PROFILES~~

MANUAL  $\phi$  & SPAN OF PROFILER

$T = 24.6^\circ\text{C}$

$T_{\text{FA}} = 0.96375$

$C_{\text{FA}} = 3732$

$T_{\text{FAO}} = 0.004$

$C_{\text{SET}} = 0.001$

$V \frac{P_0}{P} = 1980$

$P_0 = 101.3$

$P = 770 \text{ mV}$  69995 kPa

$V_{\text{CALC}} = 1388$

$V_{\text{meas}} = 1326$

$V_{\text{SET}} = 1367$

H:14 - BACK CN-LINE



11:33 - CHANGED FILTER ON EC SYSTEM / SWITCHED OUT THERM TUBING  
 FOR DEKADON (NO CHANGE IN FLOW RATE)

12:00 CHANGED PREP-COMING + OVAL-COMING  
 FOR LAST O<sub>3</sub> SENSORS!

| IN CHANNEL | CAMPBELL COOL RUNNING |         | WHAT IT SHOULD BE |        |
|------------|-----------------------|---------|-------------------|--------|
|            | CAL #                 | SERIAL  | CAL #             | SERIAL |
| 1          | 46.3                  | 4963431 | 46.9              | 973073 |
| 2          | 45.3                  | 923078  | 44.7              | " 074  |
| 3          | 44.6                  | 963430  | 45.7              | " 076  |
| 4          | 59.3                  | 973075  | 46.6              | 963432 |
| 5          | 46.4                  | 973079  | 46.3              | " 431  |
| 6          | 46.1                  | 973077  | 45.3              | 973078 |
| 7          | 45.7                  | 973076  | 44.6              | 963430 |
| 8          | 46.6                  | 963432  | 59.03             | 973075 |
| 9          | 46.9                  | 973073  | 46.4              | " 079  |
| 10         | 44.7                  | 973073  | 46.1              | " 072  |

~2:30 TOOK DOWN REBS #2  
 (LET STICK UP)

8/22 Working on O<sub>3</sub> today! OFFLINE from 11:15AM - 4:00 PM

FAST HOOKED UP AT TECO - CHECKING OUR INLET TUBING

- I) STRAIGHT INTO TECO
- II) THRU 1/2 OF OUR INLET
- III) THRU ALL OF OUR TUBING  
 (+ 55 UNION)
- IV) BACK DIRECTLY TO TECO
- V) THRU NUPRO FILTER

137-141 ppb (Fence ~5500/24)  
 OK 136-141  
 134-138 ppb OK

135-137  
 118-123 ppb  
 ~655 ~ 20 ppb IN  
 FILTER

I WAS PREPARING TO TEST OTHER PUMPS - BUT  
H<sub>2</sub> AND POWER SUPPLY BURNED OUT.

CRASO MEE - LAST THURS. IN RAIN - CIRCUIT BREAKER  
AT THE TOP BLEW - I THINK THAT THE FAST G  
PUMP MUST HAVE SUCKED IN SOME H<sub>2</sub>O - CAUSED  
THE PUMP TO HAVE A BIG CURRENT SURGE.

\* THIS MAY BE WHAT'S HAPPENING ON THE BOTTOM BREAKER!

AT ~4:00PM - SWITCHED CO<sub>2</sub> INLET FILTER UP AT THE FANIC

8/25/99

READ REMAINS ON SECLOD

- ONLY USING FAST 1.03 (DISCONNECTED PUMP TO OTHER)  
- ALSO PUT A SMALL (MAYBE TOO SMALL) OF A BALLAST  
BETWEEN SECLOD & PUMP

CALCULATING NEW CO<sub>2</sub> STD. (NOT NEGOTIATED YET)

| RUN | D     | SPAN   | SAMPLE                  |
|-----|-------|--------|-------------------------|
| 1   | 0.080 | 345.6  | <del>345.4</del> 360.95 |
| 2   | 0.04  | 345.4  | 360.56                  |
| 3   | -0.16 | 345.4  | 360.48                  |
| 4   | 0.01  | 345.48 | 360.45                  |
| 5   | 0.02  | 345.37 | 360.39                  |
| 6   | -0.07 | 345.5  | 360.67                  |
| 7   | -0.04 | 345.6  | 360.60                  |
|     |       |        | <hr/>                   |
|     |       |        | 360-610.2 ppm           |

CO<sub>2</sub> STD  
360.95

8/30/99

TOP OUTLETS

|   |   |
|---|---|
| 1 | 2 |
| 3 | 4 |

|   |   |
|---|---|
| 5 | 6 |
| 7 | 8 |

|   |   |
|---|---|
| 1 | 2 |
| 3 | 4 |

- (1) VAS RHT FAN
- (2) NIC
- (3) NIC
- (4) BLANKEN 23x
- (5) NIC
- (6) Horn/ROCK
- (7) (3) CASSER
- (8) DC POWER SUPPLY

- (1) (?)
- (2) FAST 23x
- (3) (?)
- (4) - JONIC BOX (NCR)

TOP LEVEL 23x

- (1) H RED
- (2) L BLUE
- (3) H WHT
- (4) L BLK
- (5) H BLUE
- (6) L GRN - GRN 1/3
- (7) H YELLOW
- (8) L GRN
- (9) H GRAY
- (10) L YELLOW
- (11) H BRN
- (12) L GRN

DIFF. CABLE

12V - RED  
- BLK

(7) L GRN  
L BLK  
F

WHT  
JPD

(8) H WHT  
L BLK  
F

WHT  
D.R.

(9) H - WHT  
L - GRN  
F

NR  
L.T.E

RED - Exc. 1  
RED

- (1) SWITCHED OUT BLANKING O<sub>2</sub> for BAWLING O<sub>2</sub>  
 AT TOP OF TOWER - EVERYTHING SEEMS TO BE WORKING OK  
 RELEASED RADIOMETER

- (2) CNA-1  
 (2) Q\*Z,1 => THIS WAS OK  
 (3) PAR SENSORS  
 (4) NP-LITE => ALSO MOVED - POINTED TOWARD  
 SOUTH / LEVEL BEACON  
 CNA-1, Q\*Z,1

8/31 LAURA MOVED OUR 1m CO<sub>2</sub> INLET TO 11cm (0.11m)  
 (ALSO MOVED IT OUT INTO THE WOODS.)

RA

9/3/99 Start of ANGELUX INTERCOMPARISON w/ BOB EVANS

VASAILA RH/T connector

- |   |         |
|---|---------|
| 1 | RED (2) |
| 2 | BLK (2) |
| 3 | WHS (2) |
| 4 | RED (1) |
| 5 | WHT (1) |
| 6 | BLK (1) |
| 7 | BLK (1) |
| 8 | SHIELD  |
| 9 |         |

- (\*) TURNED OFF FAST O<sub>2</sub> pump  
 (\*) NOTED - my SPAN GAS HAD GOTTEN ~ 200 psi, 2 POSSIBILITIES  
 (1) LEAK IN MY NEW VALVE I PUT IN-LINE  
 (2) LAURA TURNED UP SPAN GAS FLOW  
 For (1) => TOOK OUT VALVE  
 (2) => TURNED DOWN GAS - RESET THE PRESSURE.



(\*) TURNED OFF RHT SENSOR AT (NOTE  
THAT GETTING  $H_2O$  IN THE CONNECTOR)

9/4 → DATA RUNNING FINE AT 7:00 AM

9/5

11:00-11:15 120550 AROUND 127 EC MANUAL  
CALIBRATION / SERVED UP AT FIRST.  
THEN MANUALLY CALIBRATED

11:15-11:20 SWITCHED DESSICANT ON PRECISER.

12:15 - RHT AT 2m RUNNING AGAIN

1:25 O<sub>2</sub> OFF-LINE

1:44 MANUAL CAL OF EC SYSTEM w/ SCOTT MARIN  
STANDARD!!

AT 20FT 11:00 AM 1:45 NOTICED  
1305 = 6262 - 360-382 ppm } 3-4 ppm  
OUR 6262 - 356-359 ppm } DIFFERENCE

EVEN THOUGH SPANNED W/ SAME STANDARD!!

GUY5

|   | NE                  | SE        | SW        | NW                     |
|---|---------------------|-----------|-----------|------------------------|
| 1 | <del>600</del> 38 ✓ | 520-760 ✓ | 570-600 ✓ | 600 ✓                  |
| 2 | 600 ✓               | 520-600 ✓ | 600 ✓     | <del>600</del> (600) ✓ |
| 3 | 600                 | 600 - ✓   | 600-760 ✓ | 500 - 600              |
| 4 | 600                 | 600 ✓     | ? - 600   | 500 - 600              |

9/8/99

END OF AMERLUX INTERCOMPARISON

- 2:00-3:00 - PUT NEW 55 INLET ON CO<sub>2</sub> LINES / CLEAN K. RYG-OPTICS
- NEW FILTERS ON FIRST CO<sub>2</sub> LINES
- TURNED ON FLOW LOG (NOT BETA)
- ↳ ON AT 4:00 PM

4:00-5:00 -

MEASURED ATI SENSIC TO 13m, - RUNNING BY 5:00pm

9/10/99

10:30-11:18

EC SYSTEM DOWN

TESTING 0-10 gpm MFC; PAN ONLY

FLOW ~ 3.5 gpm THROUGH IT

(X) POSSIBLE LEAK AT ENTRANCE OF TRGA.!!

(I CERTAINLY CREATED ONE!!)

↳ BUT FIXED!

MANUAL RECAL.

Q ~ OFF BY ~ 5 gpm??

SPAN - RIGHT ON!!

9/15/99 - ~~3:34~~ - 3:00 - CHANGED O<sub>3</sub> TARGET IN FAST 1.03  
 3:18 - PROPER DOWN TIL 3:30 or so.

9/16/99 New CO<sub>2</sub> STD.

C<sub>STD</sub> = 345.4 ppm

| RUN | $\phi$           | SPAN   | SAMPLE     |
|-----|------------------|--------|------------|
| 1   | <del>-0.03</del> | 345.55 | 360.86     |
| 2   | -0.02            | 345.50 | 361.23     |
| 3   | 0.03             | 345.40 | 360.38     |
| 4   | -0.01            | 345.35 | 360.43     |
| 5   | -0.011 (-0.11)   | 345.45 | 360.68     |
| 6   | -0.03            | 345.45 | 360.48     |
| 7   |                  |        | 360.68     |
|     |                  |        | $\pm 0.32$ |

RM Young PROPANE - EXTENSION CABLE

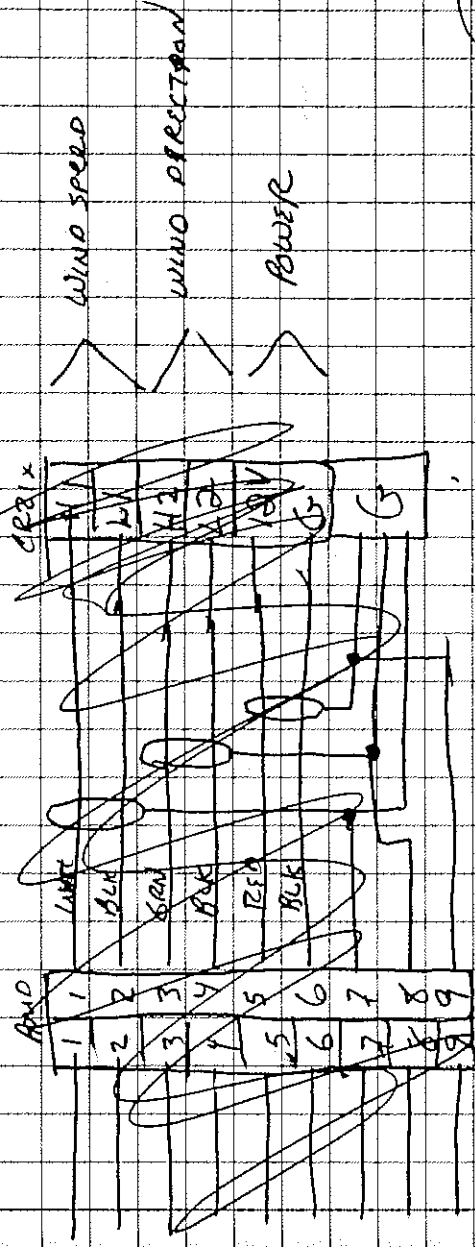

2nd ALL SAKES  
 HERM TIMES  
 for  
 SPARKS

NOV 1  
 PAGE

10:30  
 10:00

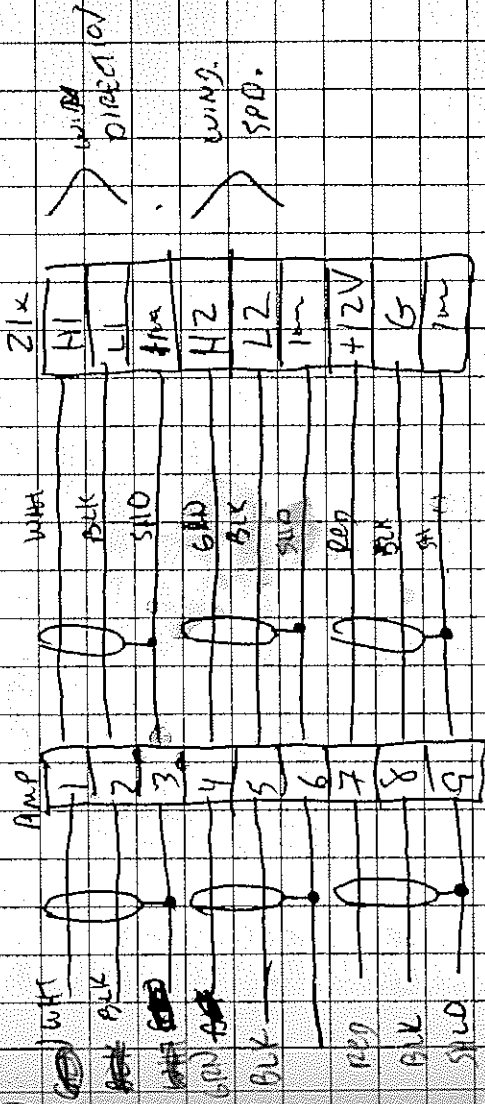

9/21/99

Rearranged RADIATION SERVICES -  
1- DATAWAGER CONNECTIONS

| PAR | REISS OFF FROM | n 10:00 AM → 4:00 PM / | PLACED PAR AT 25 METERS |
|-----|----------------|------------------------|-------------------------|
|     |                |                        | PARS AT 16 METERS       |

DROPSANE off from 2 → 3 AM

CAR ON CONTINUOUSLY

Autocals off AT ~ 3:30 PM

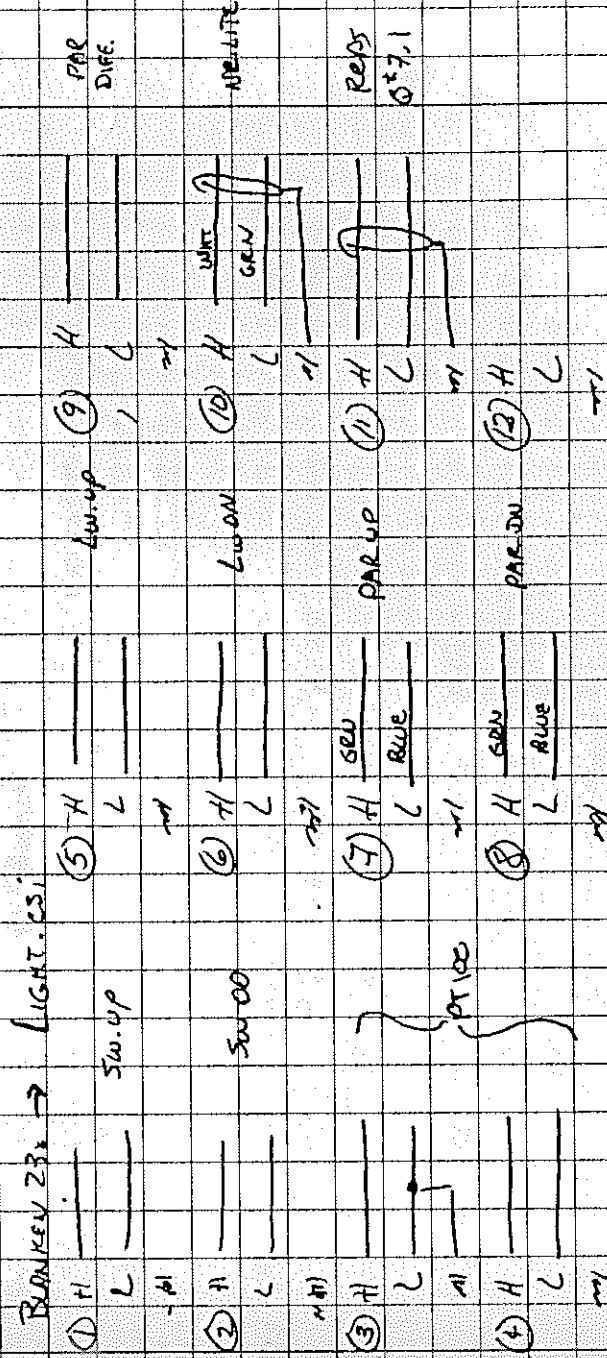



LIGHT 214 → net 214.51

① H — WHT WIND DIR.  
L — BLK 25m  
—1

② H — GRW WIND  
L — BLK SPD.  
—1

③ H — } ANOTHER  
L — } PROPANE  
—1

④ H  
L  
—1

⑤ H — WHT RH#1  
L — BLK (2m)  
—1

⑥ H — WHT RH#2  
L — BLK 8m  
—1

⑦ H — WHT RH#3  
L — BLK 2m  
—1

VAS. Pressure

CHANGED prep. config  
w/4.00

9/22/99 — NO DEANS data  
from 9/21, 16:00 → 9/22, 10:00

BLT RUNN'G NAD

— 11:00 FAST 1.03 OFF

11:30 FAST 2.03 ON

11:30 PROFILER OFF

SPARE IN  
COURSE  
CONFIG  
(REMAINING TIME  
PERIOD  
(COURSE - needs))

## PUTTING DESSICANT TRAP IN PROFILE -

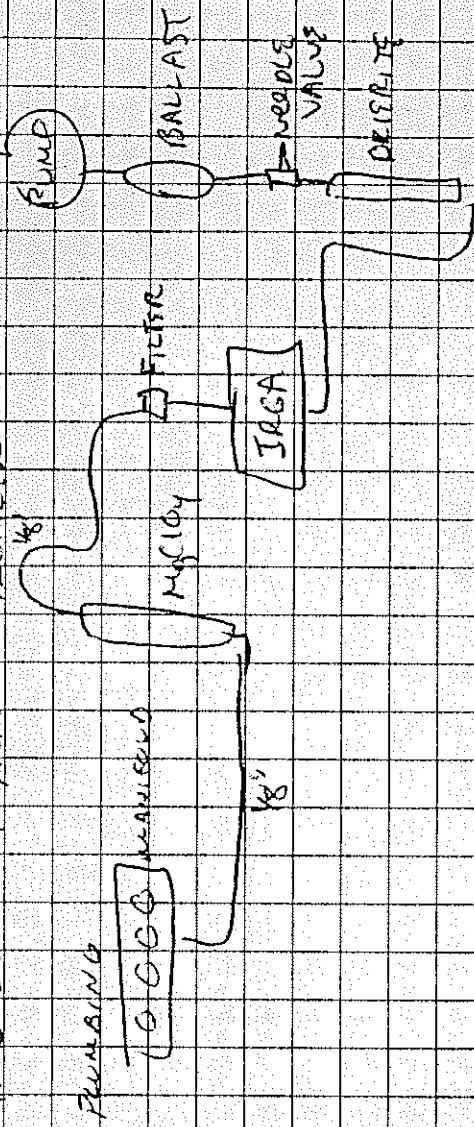

- ① ZEROED IRGA w/ Ref gas
- ② Turned on GUESS  $\Rightarrow P \sim 606 \text{ mV}$   
 $F \sim 350 \text{ ml/min}$

- ③ TRIED TO  $\phi$  - ACCUMING AS SHOWN ABOVE  
 $V = 0.011$  (NET PLATE)  
 $P = 603 \text{ mV}$

- ④ BYPASS TRAP - STILL  $\phi$ -ING  
 $V = 0.005$   $P = 607 \text{ mV}$   
ZEROED!!  $\rightarrow$  w/ pot.

- ⑤ BACK TO TRAP  $V = 0.007$  // STILL NOT  $\phi$  (DOWN TO 0.007)  
 $P = 601 \text{ mV}$   $F = 336$

- ⑥ SPAN SET  $P = 606 \text{ mV}$   $\rightarrow$  SETTING NEEDLE VALUES  
Excess flow =  $350 \text{ ml/min}$   $\rightarrow$  SAMPLE FLOW =  $320$   
 $C = 360.7 \text{ ppm}$   $T = 23.43$   
 $T_{10} = 0.85796$   
 $C_{10} = 375.74$   $1980 + 9.896$   
 $V_{10} = 1990$   $P_{10} = 0.6734$   $V_{\text{new}} = 1340$   
 $V$   $V_{\text{heads}} = 1340 \checkmark$

- ⑦ SW. TO ON TO  $\phi$  & TIME  
 $F = 320$  TA AT  $1.22 \Rightarrow 0.015 = V$   
faster Allow  $1.46 \Rightarrow 0.011 = V$

— INCREASED F TO 420  
NOCL  $P_{\text{sample}} = 534$

(\*) TURNED ON  $\phi$   $t = 52$   $U = 0.013$   
60 0.009  $\checkmark$  Flow rate is OK!!  
GOES TO 0.006 EVENTUALLY  
 $F = 415$

— SWITCH TO SPAN  $F_{\text{sample}} = 447$   
 $F_{\text{process}} = 278$  (OK)

$T = 23.22$   $P = 542$   
 $\frac{Q_E}{T} = 376.01$   $V \frac{P_0}{P} = 1991$

$V_{\text{ALC}} = 1302 \Rightarrow \checkmark \checkmark$

ONE MORE FLOW TURNING  
START ON 25  $P = 543$

|                |                |
|----------------|----------------|
| $\frac{t}{30}$ | $\frac{V}{25}$ |
| 45             | 0.019          |
| 60             | 0.011          |

LET IT RUN OVERNIGHT  
& THEN CHECK IT!!

FLOW REF = 48.5 ml/min  $\rightarrow$  BACK ON-LINE 2:09

Flow EC REF = 54.5 ml/min

ALON  $\phi$  & SPAN THE EC SYSTEM

(\*)  $\phi$  FOR  $CO_2 \sim$  SPAN  
& FOR  $H_2O$  WAS WAY OFF!!

(\*) CHANGE DESICCANT ON  $N_2$  BCK LINE  $\rightarrow$  TRY AGAIN  
MOL. SIEVE TRAP NEXT PAGE

(X) THOUGHT THAT DESSICANT TRAP ON POC GAS MAY BE BAD

SWITCHED FOR A MEL. SIEVE TRAP (GC H<sub>2</sub>O TRAP)

AT ABOUT 4:00 PM (16:00)

→ NOTICED AT 4:30 - CO<sub>2</sub> SIGNAL DROPPED LOW???

(X) PROBABLY HAVE CO<sub>2</sub> IN NEW TRAP & IT IS OUTGASSING!

⇒ NEED A NEW DESSICANT / SODA LIME TRAP.

9/24/99

~~10:00~~

10:00 - SWITCHED DESSICANT TRAP ON REFERENCE

UHP N<sub>2</sub>

10-1:00 ⇒ MOVED PROBE INLETS

INLET HEIGHTS

| <u>L</u> | <u>H</u> |
|----------|----------|
| 1        | 0.5m     |
| 2        | 1m       |
| 3        | 2m       |
| 4        | 5m       |
| 5        | 10.5m    |
| 6        | 21.5m    |

CHANGED INLET FILTERS ON L1-264

STILL NEED TO DO TOP 3 INLETS

9/30/99

CHANGED DESSICANT ON PROBE; 11:30-11:45

(CHECKED ZERO, ETC.)

→ OLD DESSICANT STILL LOOKED OK EVEN THOUGH

WE HAD SEVERAL DAYS OF SIGNAL 100% RH

(LOOKED LIKE ONLY ~ 1/3-1/2 WAS WET.)



10/8 1:30 - EC OGA  
TESTED 0+20 Lpm MFC (New mks)  
→ WHEN WIDE OPEN  
GET FLOW OF 6.8 SLpm  
(R) DOES CONTROL FINE

— NOTE - BIG Pressure DROP -  
NEED TO PUT BELOW IRGA!!  
↓  
DOWNSTREAM OF

SPAN. CAL. OF EC SYSTEM

- 10/5
- CHANGE FILTERS ON PROFIER INLETS 5 & 6  
EXTENDED ON BOOMS
  - MOVED RAIN GAGE TO SOUTH SIDE OF TOWER
  - HOOKED UP HEATER IN P.M.
  - 2:42 - 3:01

CHANGED DOWNS ON REBS #7-1

NEW CO<sub>2</sub> STD

CO<sub>2</sub> STD 345.4 ppm

| Run | $\phi$ | SPAN   | SAMPLE |
|-----|--------|--------|--------|
| 1   | 0.030  | 345.47 | 375.98 |
| 2   | 0.008  | 345.40 | 375.99 |
| 3   | 0.03   | 345.47 | 375.83 |
| 4   | 0.05   | 345.46 | 375.78 |
| 5   | 0.015  | 345.53 | 376.07 |
| 6   | 0.071  | 345.56 | 375.81 |
| 7   | 0.100  | 345.50 | 375.98 |

(16)  
375.96 ± 0.12 ppm

10/11 GIVING THE EC SYSTEM A MAKE-OVER  
 — TURNED OFF AT 10:30 AM — BACK ON-LINE  
 AT 5:00 AM

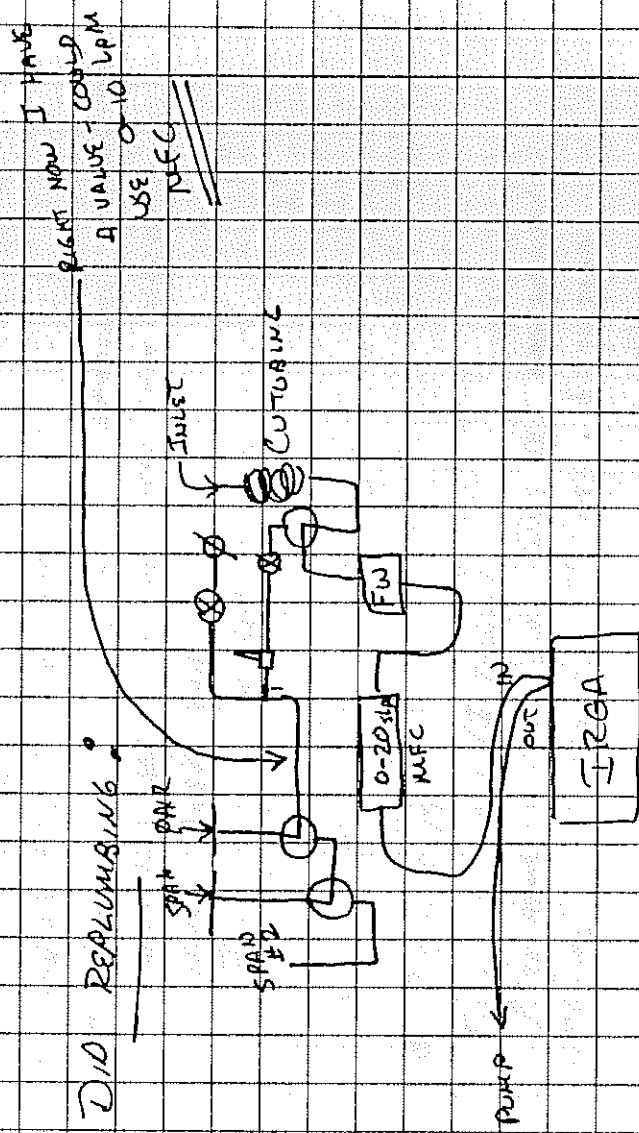

IT IS ESSENTIALLY THE SAME EXCEPT THAT I HAVE

- ① REPLACED FLOW METER W/ FLOW CONTROLLER
- ② SWITCHED THE 3-WAY SAMPLE/CALIBRATE VALVE
- ③ PUT IN EXTRA 3-WAY VALVE TO ALLOW A  
 2<sup>ND</sup> SPAN GAS TO BE PUT IN  
 (THIS IS NOT HOOKED UP YET)

④ TRIED PUT FLOW CONTROLLER DOWNSTREAM OF IRGA  
 GOOD THINGS - HIGHER PRESSURES IN IRGA  
 (P-DROP IS BELOW IRGA)

F ~ 7.05 SLPM, P = 57.5 KPA

BAD THINGS - CAN'T GET CALIBRATIONS TO WORK  
 YOU END UP FIGHTING THE FLOW CONTROLLER!!

W/ MFC DOWNSTREAM

GOOD - REGULATES FLOW/PRESSURE DURING SAMPLING &  
 CALIBRATIONS => CALIBRATIONS LOOK OK!!

BAD - BIG PRESS. DROP BEFORE IRGA (F = 6.75 SLPM)  
 F = 6.49 SLPM, P = 43.3 KPA

At 4-45- Put new  $O_2$  standard on!

10/12/99 - Look at autocals  
 → something has screwed up  
 it pumps down to very low pressure during span!  
 looks like regulator got left shut off or  
 tank leaked out, "  
 (X) looks like another site visit, "

10/13/99

— 9:50-10:15 —

Fixed autocals (I think)

Regulator on span gas was set too low  
 manually zeroed & spanned EC system

(X) Note - keep an eye on  $\phi$  offset - it was  
 about 8 ppm today.  $\Rightarrow$  I had reset it ~~and~~  
 two days before - its hard to believe it  
 would drift that much? "  
 Maybe there's junk in the new flow controller?

- checked rain gauge - can't tell if heater is working or  
 not, "

10/20/99

Switched UHP  $N_2$  on IRGAs (~2:25-2:30)

- looked like span autocals may still be screwing up

hooked up 0-10 span MFC in  $\phi$  span line  
 & reset everything,  $\Rightarrow$  3-3:30, mon  $\phi$  &  
 span

- Probera desiccant -  $\frac{1}{2}$  gone  
 (Q ~ 6 ppm)

- Rain gauge is definitely not heating. "

(X) It is getting power. "  
 - No connection over heater (open circuit)  
 call Campbell & left unadjusted. "

10/28/99  $\Rightarrow$  LOOK AT PRESSURE (CIVARS) IN EC SYSTEM  
~~PROBLEM~~ AFTER 4 BEARS PUTTING IN THE FLOW  
 CONTROLLER

- LOOKS MUCH MORE UNSTABLE W/ THE FLOW CONTROLLER  
 IN THERE?? I DON'T KNOW WHY?  
 $\Rightarrow$  CHANGES  $\rightarrow 100mV$  ( $\sim 2.2 kPa$ )  
 W/ ONLY THE FLOW METER  $\Rightarrow$  CHANGE  $\sim 20-30mV$   
 ( $0.5 kPa$ )

- NEED TO PUT FLOW METER BACK IN!!

(\*) MAYBE USE FLOW CONTROLLER FOR O<sub>2</sub> SPAN GASES!!  
 (MAKE TYLAN EXTENSION)

(\*) FURTHER

Flow is more stable w/ controller!

MUST BE DUE TO THE CONTROLLER BEING UPSTREAM  
 OF THE IRGA!! IRGA SEES MORE STRESS  
 FROM THE PUMP.

$\Rightarrow$  NEED TO PUMP CONTROLLER DOWNSTREAM OF IRGA  
 TRY CALIBRATING W/ MFC AS WELL

$\Rightarrow$  USE TYLAN 0  $\rightarrow$  10 flow  
 NEED TO MAKE EXTENSION CABLE FROM TYLAN!!

IDEA

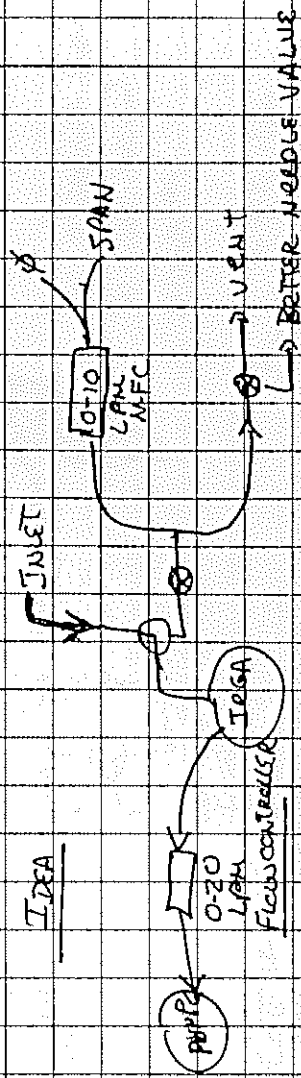



$C = 376$  ppm

$$T = 17.6$$

11411

$$\phi = 0.003 \quad \checkmark$$

$$C_{T^0} = 399.54$$

$$P_3 = 484 = 66 \cdot 377$$

$$V_{\frac{1}{2}} = 2084.9$$

0.65525

$$V_{ALE} = 1366 - V_{AES}$$

bs/e/11

- CLEANED KR-Hg. OPTICS ~ 10:30-11:00 AM

- Reprogram EC system again

DOWN - 12:30 - 1:30 PM

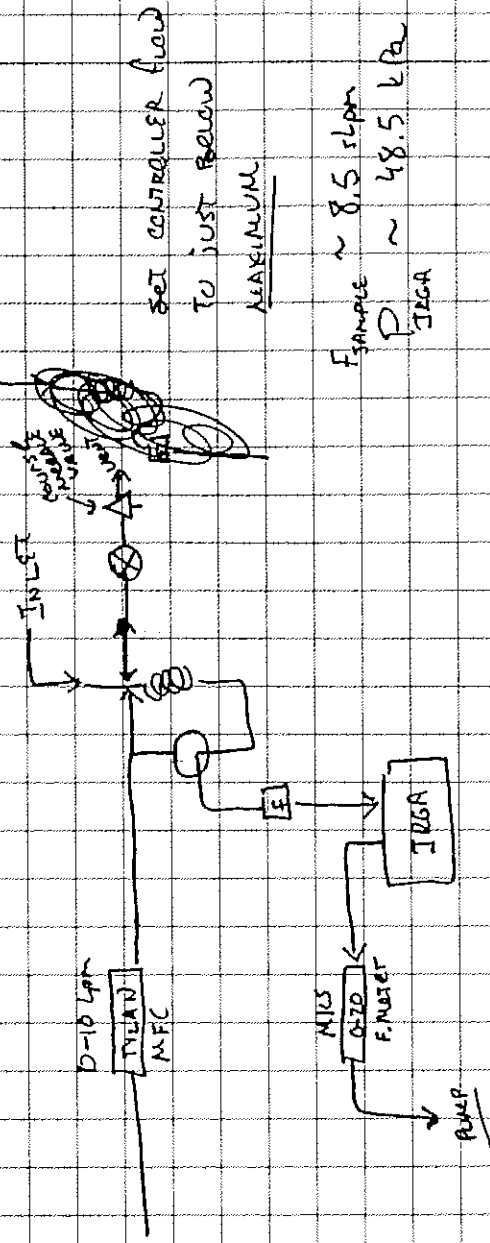

(x) NEED TO WATCH - SPEAKS TO TAKE TOO LONG TO STABILIZE WHEN DOING CALIBRATIONS!  
(WILL PROBABLY BE OK FOR SHORT TERM)

(12)  
2:30  $\Rightarrow$  MANUAL CALIBRATION OF P-CFIVER (SEE LAST PAGE)

(\*) NOTE EC ZERO KEEPS SHIFTING ~~TO~~ - NEARLY TO  
END OF ~~FOR~~ TURN-POI !!  
(TRY BLOWING AIR IN REVERSE !!)

- CHANGED FILTER ON TECO O<sub>2</sub> INLET

- New  $\phi$  AIR (~2:45 PM)

- DOWNKEAPER 23.2A (3:30)

11/8/99:

PUT UP NEW CO<sub>2</sub>/H<sub>2</sub>O INLET LINE (NEW FILTERS)  
EC SYSTEM DOWN FROM ~ 11:20 AM - 12:05 PM

NEW CO<sub>2</sub> STD.

CO<sub>2</sub> STD. = 345.4 ppm

| Run | $\phi$ | SPAN   | SAMPLE |
|-----|--------|--------|--------|
| 1   | -0.05  | 345.34 | 391.18 |
| 2   | 0.08   | 345.47 | 391.38 |
| 3   | 0.07   | 345.39 | 391.28 |
| 4   | -0.03  | 345.41 | 391.46 |
| 5   | -0.07  | 345.43 | 391.25 |
| 6   | -0.06  | 345.42 | 391.62 |
| 7   | 0.025  | 345.35 | 391.46 |

(6-)  
391.36  $\pm$  0.14 ppm

- PUT HEATER ON EC SYSTEM -

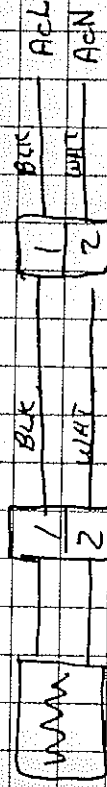

Took 14°C out of calibration line (Flow & pressure  
 equilibrate too slowly)  
 Put needle valve back in  
 (Manual  $\phi$  & span  $\approx$  330-4.00 PM)

11/11/99  $\Rightarrow$  Turned temp controller on EC system  
 Variac set to 50 (wasn't getting too hot)

$\Rightarrow$  Temp in BRX was nearly 20°C anyway - so  
 it's hard to tell if heater is helping or  
 not - let it run overnight  $\Rightarrow$  that should  
 be the best test.  
 $\odot$  Fan back on

NOTE = Plugged duck into same circuit as  
 the IRGA (major)

- Plugged heater into the extra two  
 plugs at the bottom of the tower  
 (nothing else is plugged in there right  
 now.)

11/16/99 ~10:30. Moved rain/snow gage back up  
 11:15 - New CO<sub>2</sub> STD  
391.4 ppm

CHECKING OUT SCOTT STANDARDS RELATIVE TO CHOL STD  
 C<sub>ANOL</sub> = 365.0 ppm

| RUN | $\phi$ | SCOTT TANK C |        |
|-----|--------|--------------|--------|
|     |        | SPAN         |        |
| 1   | 0.04   | 365.0        | 344.7  |
| 2   | (-0.9) | 365.04       | 344.78 |
| 3   | -0.01  | 365.0        | 344.78 |
| 4   | -0.02  | 365.06       | 344.81 |
| 5   |        |              |        |

previously 385.4 ppm ( $\pm 0.1$ )

DISCREP BY

SCOTT TANK A

| Run | $\phi$ | SPAN   | SCOTT A |
|-----|--------|--------|---------|
| 1   | 0.025  | 365.00 | 345.41  |
| 2   | 0.000  | 365.02 | 345.32  |
| 3   | -0.04  | 365.01 | 345.40  |
| 4   | -0.03  | 365.08 | 345.47  |

PREVIOUSLY  $\pm 345.7$  ppm  $\pm 0.1$  ppm  
 $\Rightarrow 345.4 \pm 0.12$  (2w)  $\rightarrow$  DIFFERENT BY 0.3 ppm

(\*) COULD DIFFERENCES BE DUE TO NOT HAVING EXACT  
PRESSURE MEASUREMENT!!

11/30/99

(\*) NOTE - REGULATOR ON SPAN GAS WAS SHUT !!  
 NO SPANS FROM

11/16 - 11/15  $\rightarrow$  11/30 - 1:15 PM

(3) TURNED OFF FAN IN EC BOX (TO KEEP IT WARMER)  
 TURNED HEATER UP A BIT.

(3) Out of  $\phi$  gas; SEANT FOR SOON !! FOUND  
 SEVERAL LEAKS (LEAKY TANK) IN EC SYSTEM  
 A FIRE GIVE BIG LEAK IN DESSICANT TRAP -  
 FIXED THAT AS WELL.

(4) GOT SAIL DATA FOR NOVEMBER

(5) MANUAL  $\phi$ /SPAN OF EC SYSTEM

12/2  $\Rightarrow$  AUTO CALS. ARE SLOWED UP !!  
2 SPANS ONLY!!



12/6/99 looked at CORSPAN regulator; ~ 11:30 AM  
 when it is off  $\Rightarrow$  Pressure looks good - BUT DROPS  
 near 0 when running.

⊗ WHILE SPANNING I/C SYSTEM - SET REGULATOR PRESSURE  
 - WHEN OFF - PRESS. BUILT UP TO ~ 70 ps.  
 THIS MAY SCREW UP THE PROPOSED CALIBRATION  
 $\Rightarrow$  NEED TO GET A NEW REGULATOR!!

12/7  $\Rightarrow$  12/10/99 MAKING UP TARGETS FOR FAST O<sub>2</sub> DETECTOR

SOLUTIONS: DYE WEIGHT + BOTTLE = 9.9779 g  
 BOTTLE ONLY = 8.9743 g  
 DYE = 1.0036 g

$$\text{SOLUTION I: } \frac{1.0036 \text{ g}}{50 \text{ mL}} \left( \frac{1000}{1 \text{ L}} \right) = \boxed{20.072 \text{ g/L}}$$

$$\text{SOLUTION II: } \frac{0.010 \text{ L}}{\cancel{1000 \text{ mL}}} \left( \frac{20.072 \text{ g}}{1 \text{ L}} \right) \frac{1000 \text{ mL}}{25 \text{ mL L}} = \boxed{8.029 \frac{\text{g}}{\text{L}}}$$

$$\text{SOLUTION III: } 0.005 \text{ L} \left( \frac{20.072 \text{ g}}{1 \text{ L}} \right) \frac{1}{50 \text{ mL}} \frac{1000 \text{ mL}}{1 \text{ L}} = \boxed{2.007 \text{ g/L}}$$

$$\text{SOLUTION IV: } (0.010 \text{ L}) \left( \frac{2.007 \text{ g}}{1 \text{ L}} \right) \frac{1}{25 \text{ mL}} \frac{1000 \text{ mL}}{1 \text{ L}} = \boxed{0.803 \text{ g/L}}$$

$$\text{SOLUTION V: } 0.005 \text{ L} \left( \frac{2.007 \text{ g}}{1 \text{ L}} \right) \frac{1}{50 \text{ mL}} \frac{1000 \text{ mL}}{1 \text{ L}} = \boxed{0.2007 \text{ g/L}}$$

SOLUTIONS: I → IV (see last page)

## FIRST ROUND of TARGETS

SUBSTRATE: SG = SILICA GEL  
CE = CELLULOSE

| VIAL | SUBST. | SOLN.        | date | MADE ON | SUBST | SOLN | class (o.d.) |
|------|--------|--------------|------|---------|-------|------|--------------|
| 1    | SG     | I            | /    | 33      | SG    | IV   | I            |
| 2    | SG     | I            | /    | 34      |       | IV   |              |
| 3    | SG     | I            | /    | 35      |       | IV   |              |
| 4    | SG     | I            | /    | 36      |       | IV   |              |
| 5    | SG     | I            | /    | 37      |       | IV   |              |
| 6    | SG     | I            | /    | 38      |       | IV   |              |
| 7    | SG     | I            | /    | 39      |       | IV   |              |
| 8    | SG     | I            | /    | 40      | SG    | IV   |              |
| 9    | CE     | I            | /    | 41      | CE    | IV   |              |
| 10   | CE     | I            | /    | 42      |       | IV   |              |
| 11   | CE     | I            | /    | 43      |       | IV   |              |
| 12   | CE     | I            | /    | 44      |       | IV   |              |
| 13   | CE     | I            | /    | 45      |       | IV   |              |
| 14   | CE     | <del>I</del> | /    | 46      |       | IV   |              |
| 15   | CE     | I            | /    | 47      |       | IV   |              |
| 16   | CE     | I            | /    | 48      | CE    | IV   |              |
| 17   | SG     | III          | /    | 49      |       | IV   |              |
| 18   | SG     | III          | /    | 50      |       | IV   |              |
| 19   | SG     | III          | /    | 51      |       | IV   |              |
| 20   | SG     | III          | /    | 52      |       | IV   |              |
| 21   | SG     | III          | /    | 53      |       | IV   |              |
| 22   | SG     | III          | /    | 54      |       | IV   |              |
| 23   | SG     | III          | /    | 55      |       | IV   |              |
| 24   | SG     | III          | /    | 56      |       | IV   |              |
| 25   | CE     | III          | /    | 57      |       | IV   |              |
| 26   | CE     | III          | /    | 58      |       | IV   |              |
| 27   | CE     | III          | /    | 59      |       | IV   |              |
| 28   | CE     | III          | /    | 60      |       | IV   |              |
| 29   | CE     | III          | /    | 61      |       | IV   |              |
| 30   | CE     | III          | /    | 62      |       | IV   |              |
| 31   | CE     | III          | /    | 63      |       | IV   |              |
| 32   | CE     | III          | /    | 64      |       | IV   |              |

quaternary bubbles

55/3/75

DUCK DISO (see DUCK MANUAL/LOGBOOK)

new AIR - 1:45 PM

new regulator on CO2 span -

reset flows on EC system - 2:00 PM

2/7/59

## STARTING FLOW RATE TEST ON SACCO

# DIET

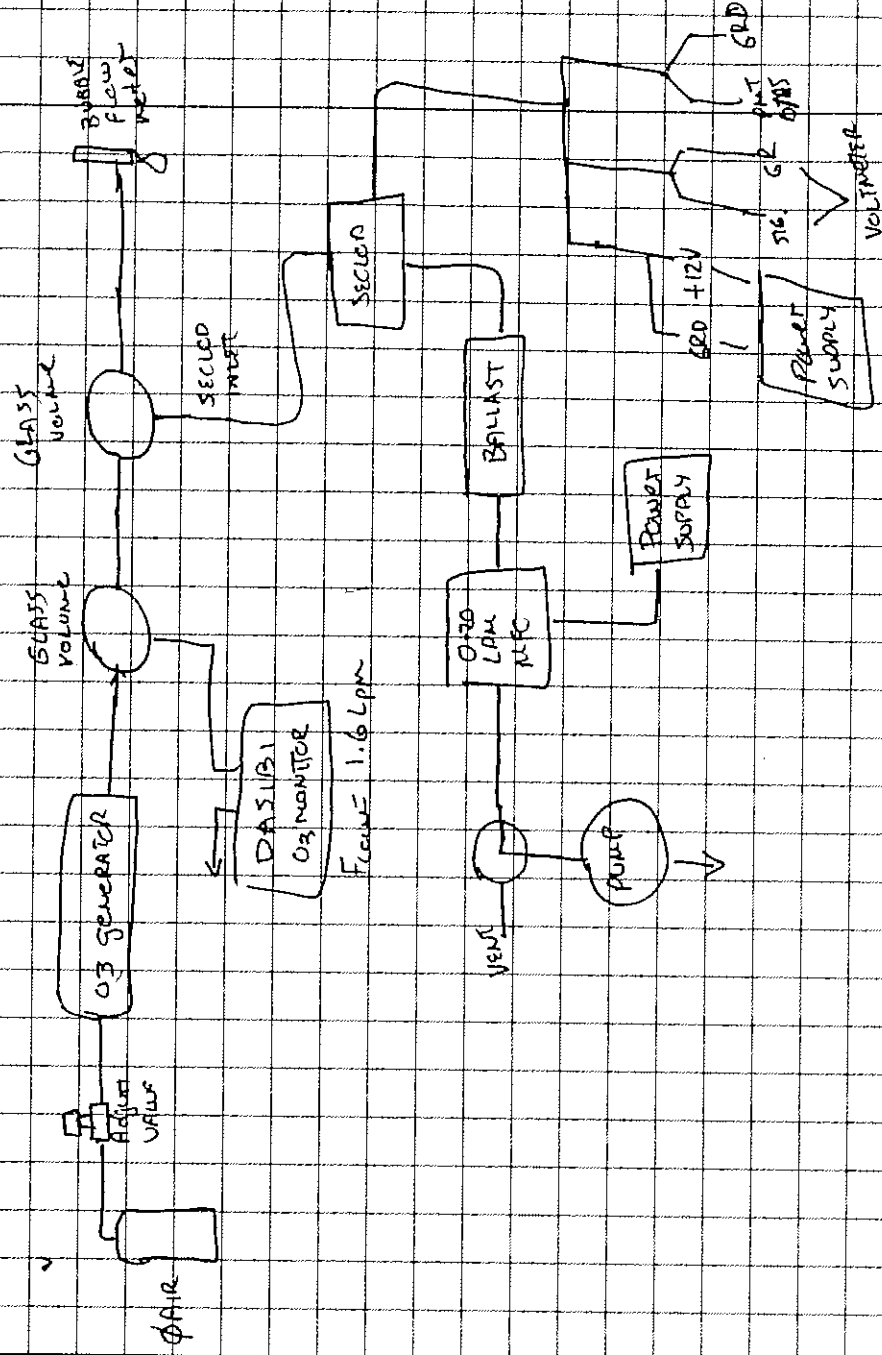

TARGET #1

PWT BIAS =

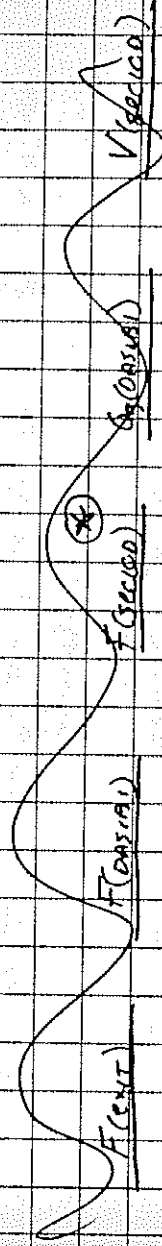

First playing WD O<sub>3</sub> generator  
 per 020 Lat MFC on O<sub>3</sub> line, closed off second

| Flow |
|------|------|------|------|------|------|------|------|------|------|------|------|------|------|------|------|------|------|------|------|------|------|------|------|------|------|------|------|------|------|------|------|------|------|------|------|------|------|------|------|------|------|------|------|------|------|------|------|------|------|------|------|------|------|------|------|------|------|------|------|------|------|------|------|------|------|------|------|------|------|------|------|------|------|------|------|------|------|------|------|------|------|------|------|------|------|------|------|------|------|------|------|------|------|------|------|------|------|------|------|------|------|------|------|------|------|------|------|------|------|------|------|------|------|------|------|------|------|------|------|------|------|------|------|------|------|------|------|------|------|------|------|------|------|------|------|------|------|------|------|------|------|------|------|------|------|------|------|------|------|------|------|------|------|------|------|------|------|------|------|------|------|------|------|------|------|------|------|------|------|------|------|------|------|------|------|------|------|------|------|------|------|------|------|------|------|------|------|------|------|------|------|------|------|------|------|------|------|------|------|------|------|------|------|------|------|------|------|------|------|------|------|------|------|------|------|------|------|------|------|------|------|------|------|------|------|------|------|------|------|------|------|------|------|------|------|------|------|------|------|------|------|------|------|------|------|------|------|------|------|------|------|------|------|------|------|------|------|------|------|------|------|------|------|------|------|------|------|------|------|------|------|------|------|------|------|------|------|------|------|------|------|------|------|------|------|------|------|------|------|------|------|------|------|------|------|------|------|------|------|------|------|------|------|------|------|------|------|------|------|------|------|------|------|------|------|------|------|------|------|------|------|------|------|------|------|------|------|------|------|------|------|------|------|------|------|------|------|------|------|------|------|------|------|------|------|------|------|------|------|------|------|------|------|------|------|------|------|------|------|------|------|------|------|------|------|------|------|------|------|------|------|------|------|------|------|------|------|------|------|------|------|------|------|------|------|------|------|------|------|------|------|------|------|------|------|------|------|------|------|------|------|------|------|------|------|------|------|------|------|------|------|------|------|------|------|------|------|------|------|------|------|------|------|------|------|------|------|------|------|------|------|------|------|------|------|------|------|------|------|------|------|------|------|------|------|------|------|------|------|------|------|------|------|------|------|------|------|------|------|------|------|------|------|------|------|------|------|------|------|------|------|------|------|------|------|------|------|------|------|------|------|------|------|------|------|------|------|------|------|------|------|------|------|------|------|------|------|------|------|------|------|------|------|------|------|------|------|------|------|------|------|------|------|------|------|------|------|------|------|------|------|------|------|------|------|------|------|------|------|------|------|------|------|------|------|------|------|------|------|------|------|------|------|------|------|------|------|------|------|------|------|------|------|------|------|------|------|------|------|------|------|------|------|------|------|------|------|------|------|------|------|------|------|------|------|------|------|------|------|------|------|------|------|------|------|------|------|------|------|------|------|------|------|------|------|------|------|------|------|------|------|------|------|------|------|------|------|------|------|------|------|------|------|------|------|------|------|------|------|------|------|------|------|------|------|------|------|------|------|------|------|------|------|------|------|------|------|------|------|------|------|------|------|------|------|------|------|------|------|------|------|------|------|------|------|------|------|------|------|------|------|------|------|------|------|------|------|------|------|------|------|------|------|------|------|------|------|------|------|------|------|------|------|------|------|------|------|------|------|------|------|------|------|------|------|------|------|------|------|------|------|------|------|------|------|------|------|------|------|------|------|------|------|------|------|------|------|------|------|------|------|------|------|------|------|------|------|------|------|------|------|------|------|------|------|------|------|------|------|------|------|------|------|------|------|------|------|------|------|------|------|------|------|------|------|------|------|------|------|------|------|------|------|------|------|------|------|------|------|------|------|------|------|------|------|------|------|------|------|------|------|------|------|------|------|------|------|------|------|------|------|------|------|------|------|------|------|------|------|------|------|------|------|------|------|------|------|------|------|------|------|------|------|------|------|------|------|------|------|------|------|------|------|------|------|------|------|------|------|------|------|------|------|------|------|------|------|------|------|------|------|------|------|------|------|------|------|------|------|------|------|------|------|------|------|------|------|------|------|------|------|------|------|------|------|------|------|------|------|------|------|------|------|------|------|------|------|------|------|------|------|------|------|------|------|------|------|------|------|------|------|------|------|------|------|------|------|------|------|------|------|------|------|------|------|------|------|------|------|------|------|------|------|------|------|------|------|------|------|------|------|------|------|------|------|------|------|------|------|------|------|------|------|------|------|------|------|------|------|------|------|------|------|------|------|------|------|------|------|------|------|------|------|------|------|------|------|------|------|------|------|------|------|------|------|------|------|------|------|------|------|------|------|------|------|------|------|------|------|------|------|------|------|------|------|------|------|------|------|------|------|------|------|------|------|------|------|------|------|------|------|------|------|------|------|------|------|------|------|------|------|------|------|------|------|------|------|------|------|------|------|------|------|------|------|------|------|------|------|------|------|------|------|------|
|------|------|------|------|------|------|------|------|------|------|------|------|------|------|------|------|------|------|------|------|------|------|------|------|------|------|------|------|------|------|------|------|------|------|------|------|------|------|------|------|------|------|------|------|------|------|------|------|------|------|------|------|------|------|------|------|------|------|------|------|------|------|------|------|------|------|------|------|------|------|------|------|------|------|------|------|------|------|------|------|------|------|------|------|------|------|------|------|------|------|------|------|------|------|------|------|------|------|------|------|------|------|------|------|------|------|------|------|------|------|------|------|------|------|------|------|------|------|------|------|------|------|------|------|------|------|------|------|------|------|------|------|------|------|------|------|------|------|------|------|------|------|------|------|------|------|------|------|------|------|------|------|------|------|------|------|------|------|------|------|------|------|------|------|------|------|------|------|------|------|------|------|------|------|------|------|------|------|------|------|------|------|------|------|------|------|------|------|------|------|------|------|------|------|------|------|------|------|------|------|------|------|------|------|------|------|------|------|------|------|------|------|------|------|------|------|------|------|------|------|------|------|------|------|------|------|------|------|------|------|------|------|------|------|------|------|------|------|------|------|------|------|------|------|------|------|------|------|------|------|------|------|------|------|------|------|------|------|------|------|------|------|------|------|------|------|------|------|------|------|------|------|------|------|------|------|------|------|------|------|------|------|------|------|------|------|------|------|------|------|------|------|------|------|------|------|------|------|------|------|------|------|------|------|------|------|------|------|------|------|------|------|------|------|------|------|------|------|------|------|------|------|------|------|------|------|------|------|------|------|------|------|------|------|------|------|------|------|------|------|------|------|------|------|------|------|------|------|------|------|------|------|------|------|------|------|------|------|------|------|------|------|------|------|------|------|------|------|------|------|------|------|------|------|------|------|------|------|------|------|------|------|------|------|------|------|------|------|------|------|------|------|------|------|------|------|------|------|------|------|------|------|------|------|------|------|------|------|------|------|------|------|------|------|------|------|------|------|------|------|------|------|------|------|------|------|------|------|------|------|------|------|------|------|------|------|------|------|------|------|------|------|------|------|------|------|------|------|------|------|------|------|------|------|------|------|------|------|------|------|------|------|------|------|------|------|------|------|------|------|------|------|------|------|------|------|------|------|------|------|------|------|------|------|------|------|------|------|------|------|------|------|------|------|------|------|------|------|------|------|------|------|------|------|------|------|------|------|------|------|------|------|------|------|------|------|------|------|------|------|------|------|------|------|------|------|------|------|------|------|------|------|------|------|------|------|------|------|------|------|------|------|------|------|------|------|------|------|------|------|------|------|------|------|------|------|------|------|------|------|------|------|------|------|------|------|------|------|------|------|------|------|------|------|------|------|------|------|------|------|------|------|------|------|------|------|------|------|------|------|------|------|------|------|------|------|------|------|------|------|------|------|------|------|------|------|------|------|------|------|------|------|------|------|------|------|------|------|------|------|------|------|------|------|------|------|------|------|------|------|------|------|------|------|------|------|------|------|------|------|------|------|------|------|------|------|------|------|------|------|------|------|------|------|------|------|------|------|------|------|------|------|------|------|------|------|------|------|------|------|------|------|------|------|------|------|------|------|------|------|------|------|------|------|------|------|------|------|------|------|------|------|------|------|------|------|------|------|------|------|------|------|------|------|------|------|------|------|------|------|------|------|------|------|------|------|------|------|------|------|------|------|------|------|------|------|------|------|------|------|------|------|------|------|------|------|------|------|------|------|------|------|------|------|------|------|------|------|------|------|------|------|------|------|------|------|------|------|------|------|------|------|------|------|------|------|------|------|------|------|------|------|------|------|------|------|------|------|------|------|------|------|------|------|------|------|------|------|------|------|------|------|------|------|------|------|------|------|------|------|------|------|------|------|------|------|------|------|------|------|------|------|------|------|------|------|------|------|------|------|------|------|------|------|------|------|------|------|------|------|------|------|------|------|------|------|------|------|------|------|------|------|------|------|------|------|------|------|------|------|------|------|------|------|------|------|------|------|------|------|------|------|------|------|------|------|------|------|------|------|------|------|------|------|------|------|------|------|------|------|------|------|------|------|------|------|------|------|------|------|------|------|------|------|------|------|------|------|------|------|------|------|------|------|------|------|------|------|------|------|------|------|------|------|------|------|------|------|------|------|------|------|------|------|------|------|------|------|------|------|------|------|------|------|------|------|------|------|------|------|------|------|------|------|------|------|------|------|------|------|------|------|------|------|------|------|------|------|------|------|------|------|------|------|------|------|------|------|------|------|------|------|------|------|------|------|------|------|------|------|------|------|------|------|------|------|------|------|------|------|------|------|------|------|------|------|------|------|------|------|------|------|------|------|------|------|------|------|------|------|------|------|------|------|------|------|------|------|------|------|------|------|------|------|------|------|------|------|------|------|------|------|------|------|------|

NO SIGN  
 AT 9:40



# 12/20/88 CABLE & MODIFICATION TO BRACED POWER SUPPLY

FOR MESSIDDA HEAD  $\Rightarrow$  PUT IN CONTROL VOLTAGE SO I CAN USE IT FOR FLOW CONTROL

| AMP RUNS     |   |
|--------------|---|
| NC           | 1 |
| SG. CON.     | 2 |
| 5G.          | 3 |
| +15          | 4 |
| 0V           | 5 |
| -15V         | 6 |
| INTER. 0-5V  | 7 |
| CONTROL 0-5V | 8 |
| SPD          | 9 |

CABLE FOR TULAN

|     |   |
|-----|---|
| BLK | 1 |
| RED | 2 |
| GRN | 3 |
| WHI | 4 |
| GRY | 5 |
| BLU | 6 |
| GRN | 7 |
| BLU | 8 |
| GRN | 9 |

12/27-12/28 - RAN OUT OF AIR ON DEC. 26 TH  
REPLACED: ~11:00AM DEC. 28 TH

ⓧ FOUND LEAK ON EC SYSTEM - HOPEFULLY THIS IS  
WHY GAS RAN OUT SO QUICK!

ⓧ SNOWPACK - DEPTH = 0.3m (12")

MANUAL @/SPAN OF EC SYSTEM

NEW COR STANDARD -

| RUN | $\phi$ |
|-----|--------|
| 1   | -0.04  |
| 2   | 0.01   |
| 3   | -0.02  |
| 4   | -0.14  |
| 5   | -0.08  |
| 6   | 0.06   |
| 7   | -0.02  |

| SPAN   | STD.     |
|--------|----------|
| 345.9  | 397.8    |
| 345.35 | 397.7    |
| 345.4  | 397.7    |
| 345.45 | 397.79   |
| 345.46 | 397.7(8) |
| 345.49 | 397.96   |
| 345.33 | 397.73   |

SCOTT TANK C = 345.4 ppm

POT ON AT  
~11:00 PM

397.8  $\pm$  0.09 ppm

- 1:30 - CLEANED KF OPTICS  
 - 1:30:21:15 - ALONG ATEI SENS TO 5 m

⊗ NOTE - W - IS ACTING UP - STILL WORKING  
 BUT NEED TO CALL AT 11

2:15-2:20 -

NEW DESSICANT IN PROFILER

12-16"

SNOW 00111  
 ~86.99"

⊗ 5/31/00  
 \* 5/31/00

ATTI BACK ON AT 20 Hz, 5 m  
 ~ 12:00 PM

NEW CAL TANK

Start Tank C 395.4 ppm

| RUN | ZERO   | SPAN    | SAMPLE (mV) | T     |
|-----|--------|---------|-------------|-------|
| 1   | 0.018  | 1388 mV | 1557        | 18.92 |
| 2   | 0.017  | 1403    | 1563        | 18.92 |
| 3   | 0.019  | 1404    | 1566        | 18.92 |
| 4   | 0.005  | 1401    | 1564        | 18.92 |
| 5   | 0.0113 | 1397    | 1557        | 18.92 |
| 6   | 0.006  | 1388    | 1548        | 18.92 |
| 7   | 0.009  | 1390    | 1551        | 18.92 |

⊗ USING IRGA #308

CAL CO2 ON MUSTER ⇒ CALCULATE SPAN VOLTAGE

DON'T TRY TO WAGGLE

B ~ 728 mV

T ~ 17-18. °C

RUN

CO2 (ppm)

1 394.1

2 399.02

3 399.86

4 400.84

5 399.68

6 399.56

7 399.97

CHANGED AIR - ONLY 200-300psi ⇒ NEED TO RETURN

NEW STANDARD - 3:30 PM

NEW DESSICANT ON PROFILER - 3:50 PM

399.8 ± 0.6

ppm

SECOND FLOW TESTING  
 TARGET #1; LAT RUN UP 60 ppb G3 R-A WHITE  
 47.6 LPM  
 F<sub>tot</sub> = 446 (16.8% slant)

| Sec. 1           | Sec. 2 | Sec. 3 | 0.3 (ppb) |
|------------------|--------|--------|-----------|
| 6.83             | 426    | 306    | 47        |
| 4.83             | 395    | 308    | 48        |
| 2.40             | 353    | 307    | 47        |
| 1.06             | 323    | 318    | 48        |
| 4.60             | 389    | 307    | 48        |
| 7.06             | 426    | 307    | 48        |
| 8.36             | 445    | 306    | 47        |
| 10.13            | 464    | 306    | 48        |
| 11.45            | 470    | 306    | 46        |
| 11.75            | 473    | 307    | 45        |
| 12.25            | 477    |        |           |
| 15.86            | 515    | 321    | 44        |
| 16.00            | 510    | 316    |           |
| <del>15.86</del> |        |        |           |
| 14.9             | 514    | 320    | 44        |
| 13.85            | 505    | 317    | "         |
| 12.92            | 495    | 315    | 47        |
| 11.94            | 484    |        | 46        |
| 9.50             | 462    | 307    | 47        |
| 12.25            | 483    | 307    | 50        |
| 12.30            | 319    | 200    | 30/27/31  |

LAMP OFF

12.27 0 !!

13/11

→ PICKING UP NOISE  
 from LAMP !!

→ NO. → STILL HAVE  
 FLOW

Reflex 1.00

11/10/00 = Realized that I was not getting zero flow through second when I thought it was. Therefore our "zero" measurement is not real - still feeding or in cells (should subtract off)

Do Again:

$$\text{zero } C_2 = 11 \text{ ppb}$$

$$F_{\text{net}} = 9/16 \Rightarrow 16.64 \text{ slpm}$$

Let pump ~~off~~ at same flow w/ O<sub>2</sub> for a while - (135 ppb)

| $F_{\text{second}}$ | $\frac{\text{zero} - (\text{disconnected})}{\text{signal (mV)}}$ | $C_2 \text{ ppb}$ |
|---------------------|------------------------------------------------------------------|-------------------|
| 2.05                | 0.001                                                            | 45 ppb            |
| 1.808               | <del>0.001</del> 0.001                                           | 45                |
| 3.30                | 0.001                                                            | 44                |
| 5.82                | 0.001                                                            | 47                |
| 7.98                | 0.001                                                            | 46                |
| 9.38                | 0.001                                                            | 46                |
| 10.27               | 0.001                                                            | 47                |
| 11.00               | 0.001                                                            | 48                |
| 13.50               | 0.001                                                            | 46                |
| 22.14               | 0.001                                                            | 46                |
| zero                | 0.001                                                            | 46                |
| 15.00               | 0.001                                                            | 46                |
| 11.93               | 0.001                                                            | 46                |
| 10.38               | 0.001                                                            | 47                |
| <del>9.48</del>     | 0.001                                                            | 47                |
| 9.68                | 0.001                                                            | 47                |
| 9.10                | 0.001                                                            | 47                |
| 3.60                | 0.001                                                            | 47                |
| 1.36                | 0.001                                                            | 47                |
| 0.73                | 0.001                                                            | 47                |
| pump off            | 0.001                                                            | 47                |
| lamp off            | 0.001                                                            | 47                |

2.5  
2.5  
0.25



2/3/00 AT SITE

- New  $\phi$  AIR
- FILLED UP A BUNCH OF CYLINDERS
- DOWNLOADED 23xA
- + TRIED PUTTING IN NEW PROFILER CODE - BUT IT DIDN'T WORK??
- DUG PROFILER LINGS OUT OF THE SNOW & HUNG THEM IN TREES

2/18/00 AT SITE

- Ⓢ NEW  $\phi$  AIR (OLD ONE STILL HAD 700 PSI. OR SO IN IT)
- PUT NEW CAMPBELL PROGRAM IN PROFILER. ~12:30 PM  
IT WORKS!!
- KEY = USE FINAL STORAGE #1  $\Rightarrow$  GOES TO DUCK (LIKE IT ALWAYS USED TO)
- FINAL STORAGE #2  $\Rightarrow$  30 MIN. AVG.
- Ⓢ NEXT TIME UP  $\Rightarrow$  SHOULD DOWNLOAD & LOOK AT AVG'S.

2:00-2:35  $\Rightarrow$  MOVED AT1 SONIC TO 21.5 m (NEXT TO CAMPBELL BUT RUNNING AT 20 Hz)

3/1/00

→ COULDN'T CONTACT MUSTER

TURNS OUT MUSTER WAS DOWN  
(MUSTER OK IN AFTERNOON)

MUSTER/QUACKER WAS FINE

10-10-45 → REPLACED CO<sub>2</sub> INLET FILTER (NEW INLET ARRANGEMENT)  
NO STAINLESS STEEL

TOOK FILTER OFF SEC LOO

NEW PAL TANK

SECTOR TANK C

395.4 ppm

RUN

Φ

SPAN

|   |        |        |         |        |
|---|--------|--------|---------|--------|
| 1 | 0.021  | 1433   | 1584 mV | 395.86 |
| 2 | 0.0223 | 1429 ✓ | 1582    | 396.84 |
| 3 | 0.022  | 1423   | 1576    | 396.88 |
| 4 | 0.022  | 1421   | 1567    | 395.09 |
| 5 | 0.019  | 1413   | 1564    | 396.11 |
| 6 | 0.019  | 1411   | 1564    | 397.41 |
| 7 | 0.021  | 1410   | 1562    | 396.93 |

396.45

± 0.80 ppm  
(avg)

3/2/00 A FEW QUICK SIGNAL TESTS 27 SECOND #1

| TARGET #     | SUB.          | SOUN           | [0.3] ppb     | SIGNAL (mV)                                                                                                                                      |
|--------------|---------------|----------------|---------------|--------------------------------------------------------------------------------------------------------------------------------------------------|
| 1            | SG            | I              | 52            | 443                                                                                                                                              |
| 4            | SG            | I              | 51            | 415 mV                                                                                                                                           |
| 17           | SG            | III            | 52            | 372-389                                                                                                                                          |
| 9            | CE            | I              | 53            | 160                                                                                                                                              |
| 25           | CE            | III            | 52            | 68-72                                                                                                                                            |
| 5            | SG            | I              | 51            | 167-365 → 365 - FAIRLY LOW                                                                                                                       |
| <del>8</del> | <del>SG</del> | <del>III</del> | <del>52</del> | → 324 → 446 / "INVERTED" PERIOD<br>SIGNAL DOUBLED                                                                                                |
| 18           | SG            | III            | 52            | 318 → 400                                                                                                                                        |
| 1            | CE            | I              | 50            | 264 → 150 → 330 keeps degrading                                                                                                                  |
| 25           | CE            | III            | 52            | 69-70                                                                                                                                            |
| 16           | CE            | I              | 52            | → 110 → 182<br>63 → 108 → 126                                                                                                                    |
| 23           | SG            | III            | 52            | 392<br>430 → 405 → 360 * THIS ONE<br>ONLY DECREASED 1M<br>BACKUP? 382 → 405 FIRST FEW MINUTES??<br>→ 432 → 446<br>STABILIZED 440 AFTER ~ 1/2 MIN |

W/ Ø AIR FLOWING THRU → SECOND SIG ~ 56 mV

RESULTS ARE A BIT WIERD BECAUSE OF INDUCTION PERIOD

BOTTOM LINE: CELLULOSE TARGETS GIVE  $< 1/2$  SIGNAL OF ANY 10-5G TARGETS BARK 20g/L & 2g/L  
5G TARGETS GIVE ~ SAME SIGNAL, DON'T KNOW ABOUT LONGEVITY → HIGH CONC MAY LAST LONGER!!

NEED DATA LAGER TO TEST THIS!!

SEE ON 1ST RUN  
+ DION CHANGE  
BIAS 7.5V  
GAIN?  
FILTER?

3/10/00 - Rada Securo Flow Test (Leaky Ballast)

TARGET # 23: SUGEN (KG  $\Rightarrow$  Sec. III)

NO PAIR RUNNING

TECO = 10ppb

SECURD = 54 mV

FIR = 416 (cal meter)

$\sim 16.6$  36ppb

set up flow = 9.7 gpm in Securo - 1.39 let run for 20 min

TO DENOTION TARGET  
& STABILIZE CAMP

| Securo Flow                 | SUGEN | On ppb |
|-----------------------------|-------|--------|
| 9.45                        | 581   | 42     |
| 3.66                        | 283   | 45     |
| 2.45                        | 250   | 44     |
| 1.34                        | 217   | 45     |
| 0.330                       | 187   | 44     |
| 3.39                        | 260   | 45     |
| 5.50                        | 330   | 44     |
| 6.74                        | 387   | 43     |
| 8.02                        | 459   | 42     |
| 9.28                        | 528   | 43     |
| 9.86                        | 553   | 44     |
| 10.40                       | 579   | 43     |
| 10.70                       | 588   | 43     |
| (small<br>value open) 11.15 | 604   | 42     |
| 15.25                       | 809   | 43     |
| 14.8                        | 798   | 42     |
| 14.04                       | 789   | 42     |
| 13.19                       | 699   | 43     |
| 12.46                       | 658   | 43     |

33  
330  
33

TECO = 51 mV



now using CE target #25 HG (S.W.I)

| <u>SECOND FUEL</u>          | <u>SIGNAL</u> | <u>0300A</u> |
|-----------------------------|---------------|--------------|
| 11.2                        | 98            | 44           |
| 10.35                       | 90.3          | 44           |
| 6.6                         | 97-100        | 42           |
| 1.14                        | 100           | 43           |
| 2.56                        | 118           | 45           |
| 3.44                        | 123           | 45           |
| 4.87                        | 124           | 44           |
| 5.92                        | 119           | 44           |
| 7.33                        | 109           | 44           |
| 8.26                        | 109           | 44           |
| 9.13                        | 110           | 45           |
| 9.94                        | 109           | 45           |
| (all over) 11.13            | 113           | 43           |
| 12.45                       | 117           | 43           |
| 13.7                        | 120           | 44           |
| 15.5                        | 126           | 44           |
| 11.1                        |               |              |
| TURN OFF CAMP               | 52            | 11           |
| TURN ON                     |               |              |
| 11.1                        | 115           |              |
| DISCONNECT SECOND WEST LINE |               |              |
| 11.1                        | 56            |              |
| TURN OFF CAMP               |               |              |
| 11.1                        | 56            |              |

0300A

Adding  $H_2O$ , same DE TARGET 57

| Sec 000 Flow | Flow             | Finale         | Signal | Q3               | Temp Bin I |
|--------------|------------------|----------------|--------|------------------|------------|
| 0 off        | 11.14            | 364 (normal)   | 110    | 42               | +15°C      |
| ON           | <del>11.14</del> | <del>364</del> |        |                  |            |
|              | 11.14            | 364            | 114    | 46               | -16.1      |
|              | 11.16            | 364            | 108    | 45               | +2.8°C     |
|              | 11.17            | 312 (12.48)    | 1      | <del>45</del> 47 |            |

(Total = 15.88)

|       |             |      |     |    |                        |
|-------|-------------|------|-----|----|------------------------|
| 11.17 | 312 (12.48) | 3.4  | 120 | 46 | -1.66°C                |
| 11.13 | 271 (10.84) | 5.06 | 117 | 47 | 4.0°C <del>3.8°C</del> |
| 11.17 | 208 (8.32)  | 7.81 | 108 | 44 | 8.8°C                  |

POT  $H_2O$  IN prior to  $O_3$  gen. (ans changing 1037 because flow rates changing)

|                                                                 |            |      |                   |    |             |
|-----------------------------------------------------------------|------------|------|-------------------|----|-------------|
| - $O_3$ generator OFF / $H_2O$ off (Flow = 16.0 slpm)           |            |      |                   |    |             |
| 11.14                                                           | 214 (8.56) | 7.95 | <del>103</del> 46 | 10 | -16°C       |
| - $O_3$ gen. ON // $H_2O$ off $\Rightarrow$ let run for 10 min. |            |      |                   |    |             |
| 11.17                                                           | 214        | 7.75 | <del>103</del> 46 | 46 | -16         |
| $O_3$ ON // $H_2O$ on (see pulse of $O_3 \rightarrow 57$ ppb)   |            |      |                   |    |             |
| 11.26                                                           | 214        | 7.75 | 131               | 46 | 7.3°C       |
| 11.28                                                           | 153        | 9.82 | 130               | 45 | 10.40°C     |
| 11.30                                                           | 271        | 5.14 | 124               | 45 | 1.8°C       |
| 11.28                                                           | 312        | 3.78 | 123               | 46 | -3.1°C      |
| $H_2O$ OFF $\rightarrow$ 11.28                                  | 400        | —    | 98                | 42 | -16°C (any) |

0.3425

PLC K6 TARGET #23 BACK IN

H2O OFF

| SEC 0.0 FLOW | FLOW | SPAN | OSI | TEMP |
|--------------|------|------|-----|------|
| 11.3         | 400  | 6.35 | 46  | -16  |

H2O ON  $\Rightarrow$  0.3 PRESSURE!!

|          |     |                    |    |       |
|----------|-----|--------------------|----|-------|
| 11.2     | 345 | 720                | 46 | -9.1  |
|          | 278 | 716                | 46 | 0.9°C |
|          | 226 | <del>650</del> 645 | 48 | 5.1°C |
|          | 155 | 567                | 44 | 9.3°C |
| H2O OFF  | 155 | 480 (?)            | 44 | -16   |
|          | "   | 540                | 44 | 8.4°C |
| CAMP OFF | 400 | 460                | 44 | -16°C |

CAMP OFF

47

3/13/08

- TOOK DOWN FLOW #2 AT 10 AM (11:11:30 AM)

- DOWNLOADED PLOT 30 (~12:00)  
NEED TO DO CNR 30

NEW OR MIX  $\Rightarrow$  NOT NEEDED AT TOWER YET!!  
C<sub>2</sub> = 345.4 ppm

| RUN | $\phi$ (mV)      | SPAN        | SPAN (mV) | TEMP       |
|-----|------------------|-------------|-----------|------------|
| 1   | 32               | 1425 (1433) | 1581      | ? [345.4]  |
| 2   | 21               | 1418        | 1580      | 400.14 (?) |
| 3   | <del>21</del> 18 | 1409 (1411) | 1573      | 400.00     |
| 4   | 9                | 1395        | 1557      | 400.31     |
| 5   | 9                | 1391        | 1552      | 400.4      |
| 6   | 9                | 1388 ✓      | 1550      | 400.28     |
| 7   | 10               | 1387 ✓      | 1549      | 400.24     |
| 8   | 10               | 1385 (1386) | 1548      | 400.50     |
|     |                  |             |           | 400.28 ppm |

⊗ UPped the  $\phi$  FLOW (REGULATOR PRESSURE - (CAL PRESSURE  $\pm$  0.18)  
DIDN'T CHANGE

3/16/00 ← Moved FTI some down 1 level  
(3:00-3:30)  
← cleaned Kr hga optics (3:33-3:45)

3/23/00 De some more fuel tests w/ H<sub>2</sub>O present!  
turned on fcuws (+H<sub>2</sub>O); LAMP OFF + let stabilize for 10 mins.

F<sub>4018</sub> = 3.77 slpm  
F<sub>4</sub> = ~~3.77~~ 2.78 slpm  
338 ⇒ 13.52 slpm  
15.95 slpm  
TOTAL  
17.054 slpm

# ① TARGET #23

| Flow Sec'd         | SEC'D SIGNAL      | G3<br>TECD       | DEW PT.                  | Comments        |
|--------------------|-------------------|------------------|--------------------------|-----------------|
| 19.538             | 0.05              | 10               | -2.7                     | LAMP OFF        |
| 10.228             | 717               | 41               | -3.68                    | LAMP ON + 10min |
| 9.12               | 643               | 42               | -3.76                    |                 |
| 7.95               | 609               | 43               | -3.80                    |                 |
| 0.75               | 392               | 42               | -4 (0.40V)               |                 |
| 1.59               | 440               | 42               | -4.04                    |                 |
| 2.55               | 492               | 42               | -4.09                    |                 |
| 3.90               | 548               | 43               | -4.15                    |                 |
| 5.15               | 588               | 43               | -4.15                    |                 |
| 6.95               | 591               | 43               | -4.24                    |                 |
| 8.11               | 608               | 43               | -4.27                    |                 |
| 9.12               | 643.635           | 43               | -4.30                    |                 |
| 9.91               | 680               | 43               | -4.32                    |                 |
| - 10.3 (wire open) | 700               | <del>43</del> 43 | -4.35                    |                 |
| 11.4               | 743               | 43               | -4.4                     |                 |
| 13.3               | 791               | 44               | -4.42                    |                 |
| 14.45              | 845               | 43               | -4.4                     |                 |
| 10.28              | 8686              | 44               | -4.5 ⇒ let run for 10min |                 |
|                    | 664 (After 10min) |                  |                          |                 |

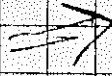



Now Target #4 KG = SOLN I

Assume ~ 2 sec OKG.

| Flow Set. | Setl. Signal | G3 | Dev Pr | Comment     |
|-----------|--------------|----|--------|-------------|
| 10.38     | 277          | 44 | -4.8   | Cap signal? |
| 9.18      | 2603         | 45 | -4.8   |             |
| 2.87      | 212          | 46 | -4.9   |             |
| 1.04      | 170          | "  | "      |             |
| 5.63      | 245          | 44 | "      |             |
| 7.27      | 250          | 45 | "      |             |
| 8.77      | 273          | "  | "      |             |
| 9.80      | 299          | 43 | "      |             |
| 10.3      | 314          | 42 | "      |             |
| 12.5      | 370          | 42 | -4.93  |             |
| 14.1      | 408          | 44 | "      |             |
| 10.3      | 333          | 44 | "      |             |

fixing!

TEST VARIABILITY IN TARGETS:

| TARGET #    | Sec 100 Flow | Sec 100 V | O3 | Dev Pr |
|-------------|--------------|-----------|----|--------|
| KG, III, 33 | 10.35        | 500       | 43 | -5     |
|             | 8.57         | 484       | 44 | "      |
|             | 6.13         | 482       | 43 | -5     |
|             | 1.61         | 369       | 44 | "      |
|             | 3.72         | 480       | "  | "      |
|             | 9.27         | 530       | 43 | "      |
|             | 10.30        | 537       | "  | "      |
|             | 12.05        | 632       | 41 | "      |
|             | 10.30        | 550       | 40 | "      |
| #35         |              | 570       |    |        |

#35

⊗ need

to rethink

PLUMBING

CHANGED TO AT SAMPLE INLET - LESS AP, NOW NO

Sec 100 Flow GROSS PUMP IS ON

|       |       |     |        |    |      |      |         |
|-------|-------|-----|--------|----|------|------|---------|
| 10.49 | 12.44 | 532 | 688    | 42 | 742  | -3.6 | 77-5.86 |
| 9.64  | 11.72 | 483 | 660    | 41 | 41   | -3.6 |         |
| 8.95  | 10.28 | 437 | 579(7) | "  | 41   | -3.7 |         |
| 5.77  |       | 338 | 43     | 43 | "    | "    |         |
| 3.55  |       | 322 | 41     | 41 | "    | "    |         |
| 1.27  |       | 205 | 41     | 41 | "    | "    |         |
| 6.94  |       | 374 | 41     | 41 | -3.8 |      |         |
| 10.31 |       | 539 | 42     | 42 | -3.8 |      |         |
| 13.98 |       | 732 | 42     | 42 | -3.8 |      |         |

OBTAINED ALL VALUES

$$\begin{array}{r}
 \text{EC100 FLOW} \\
 \hline
 17.8 \\
 \hline
 \end{array}
 \quad
 \begin{array}{r}
 \text{SKNHL} \\
 \hline
 976 \\
 \hline
 \end{array}
 \quad
 \begin{array}{r}
 \text{C} \rightarrow 1000 \\
 \hline
 632 - 5612 \\
 \hline
 1080 \\
 \hline
 627 \\
 \hline
 \end{array}
 \quad
 \begin{array}{r}
 \text{C3} \\
 \hline
 42 \\
 \hline
 \end{array}
 \quad
 \begin{array}{r}
 T_0 \\
 \hline
 -3.9 \\
 \hline
 \end{array}$$

16.4  
17.8  
10.3

3/24/00 AT SITE

- (\*) NEW CAL. STANDARD ~ 11:00AM
- DOWNLOADED CNR DATA LOGS ~ 1:30PM
  - REPROGRAMMED SECUO; COULDN'T TURN IT ON BECAUSE TAPE WAS SCRAMMED UP  $\Rightarrow$  COULD GET TARGET TO STICK ALSO VOLT METER DIED  $\Rightarrow$  USED 9V BATTERY

4/5/00  $\phi$ , SPAN EC SYSTEM 11:51  
new  $\phi$  Air (N<sub>2</sub>)

$\phi$ , SPAN PROFILER

13mm = 40V  
65.15 kPa

$\phi_2 = 400.3$   $T = 18.6$

$$C_2 \frac{T_0}{T} = 423.9$$

$$V \frac{P_0}{P} = 2179.7 \quad P = 0.23 \text{ mV}$$

$$P \phi = 466 \text{ mV}$$

$$\phi = -0.010 \text{ mV}$$

set to  $\phi$

$$V_c = 1408.1$$

$$ZC405 \quad 1409 \text{ mV}$$

(12:00 - 12:06) ✓

433-534-600

4/14/00 New Secico - Flow Controller Box -  
0-20.5Lpm MFC

USING TARGET #35

ⓐ WILL ATTEMPT A CALIBRATION PLCT (MAY NOT BE ABLE  
TO VARY O<sub>2</sub> VERY MUCH)

F<sub>Secico</sub> = 6.5

(can feel excess flow at vent!)

F<sub>tot</sub> = 8.0

NO WATER - Dew Pt ~ -18°C

O<sub>2</sub> ppb

same off ⇒ 7 (reduced)

36

31

19/20

10 (0.3)

62

let run for a few minutes

68

53

69

64/65

57

47

41

37

33

29

21

19

67

70

71

TURNED  
H<sub>2</sub>O

Secico Signal (mV)

~~10~~ 10 mV

358

267

113

1

800

let run for a few minutes

886

720

973

918

805/807

620

547

467

380

288

171

130

← AFTER 20 minutes

710 → 723 mV

778

800

500 → 490

Dew Pt = 22.27

11:21 AM

11:31

11:39

→ SIGNAL WENT UP

over ~ 5 min.

THEN LEVELLED OFF

## CCF RUNNING

11:48, ~~DATA~~

D3

SOLAR

| Time  | On (apb)         | Dew Pt (°C) | SIGNAL (mV) |
|-------|------------------|-------------|-------------|
| 11:48 | 51               | 20.4 °C     | 488         |
| 1:07  | 56               | 15.1 °C     | 475         |
|       | 59               | 15.0        | 526         |
|       | <del>44-46</del> | 15.0        | 369         |
|       | 39               | 15.0        | 288         |
|       | 31               | 15          | 230         |
|       | 26/27            | 15          | 160         |
|       | 19/20            | 15          | 99          |
|       | 15               | 15.1        | 24          |
|       | 10               | 15.1        | 1           |
|       | 44/45            | 15.1        | 350         |
|       | 64-65            | 15          | 530         |

CHANGED PUMPING  $\Rightarrow$  4.0 AUGUST IN TEMP 8476/11

1253

## Dew Pt VARIATION

|      |    |                    |     |
|------|----|--------------------|-----|
| 2:21 | 65 | 14.8               | 563 |
| 3:02 | 64 | 11.1               | 606 |
| 3:34 | 65 | <del>5.7</del> 7.7 | 615 |
| 3:53 | 67 | 18.6               | 499 |

1420 ccf

3:55 71 -14 548 (??)

1420 on 65 19.2

CAMP ccf 11

527 ~~1420 on~~

9/11



4/17/00 - New Reagent in prefilter - 1.38-1.32

- SECOND #1 RUNNING AT 9:45 PM  
F = 5.5 J/LPM

$$5.5 \left( \frac{101.3 \text{ kPa}}{71 \text{ kPa}} \right) \left( \frac{285}{273} \right) = 8.26 \text{ LPM}$$

Looks very noisy - BUT SIGNAL IS  
UP AROUND

4/18/00 TILT METER ON  
ATI SONIC

$$\pm x \Rightarrow 0.115 \text{ V} \quad 1.202^\circ$$

$$\pm x \Rightarrow -0.226 \text{ V} \quad -2.364$$

11:25 AM

$$\pm x = 0.581 \text{ V} \quad \text{OK}$$

$$\pm y = -0.184$$

5/24/00 New CO<sub>2</sub> CAL. TANK

STD. CO<sub>2</sub> = 345.4 ppm

| Run | (mV)<br>S | SPAN  |     |        | SAMPLE |     |        |
|-----|-----------|-------|-----|--------|--------|-----|--------|
|     |           | T     | P   | 510 mV | T      | P   | 510 mV |
| 1   | 16        | 28.45 | 765 | 1377   | 28.6   | 764 | 1538   |
| 2   | 17        | 28.78 | 765 | 1377   | 28.88  | 765 | 1540   |
| 3   | 18        | 29.00 | 765 | 1378   | 29.05  | 765 | 1540   |
| 4   | 18        | 29.23 | 765 | 1377   | 29.28  | 766 | 1539   |
| 5   | 18        | 29.25 | 767 | 1377   | 29.25  | 766 | 1540   |
| 6   | 18        | 28.88 | 766 | 1378   | 28.82  | 766 | 1542   |
| 7   | 18        | 28.82 | 767 | 1379   | 28.85  | 767 | 1542   |

400.79 ±

0.25 ppm

SNOW CORES

1:45 → 4:20 PM

| 1               | 2                       | 3    | 4               | 5                  | DISTANCE |
|-----------------|-------------------------|------|-----------------|--------------------|----------|
| 80cm            | 76cm<br>(combined)      | 82cm | 65cm            |                    | 400m W   |
| 55cm            | 57cm                    | 74cm | <del>86cm</del> |                    | 400m W   |
| <del>55cm</del> | 83cm                    |      | 86cm            |                    | 300m W   |
| 69cm            |                         |      |                 | 84cm               | 300m W   |
| 67cm            | 73cm                    | 98cm | 42cm            |                    | 200m W   |
| 78cm            | 64cm<br>(71 combined)   | 72cm |                 | combined<br>(95cm) | 100m W   |
| 50cm            | 64cm<br>(68cm combined) | 64cm |                 |                    | 100m W   |
| 55cm            | 65cm                    | 58   |                 |                    | 0m       |
|                 |                         |      | 58cm            |                    | 200 E    |
|                 |                         |      | 63cm            |                    | 100 E    |
|                 |                         |      |                 |                    | 200 E    |
|                 |                         |      |                 |                    | 100 E    |

10:15 ⇒ K<sub>1</sub> hyg. off // send back to Campbell  
 11:00 ⇒ new O<sub>3</sub> target (#5) section running  
 (moved pump down 1 level)  
 11:30 ⇒ REBS radiation off

~~11:30~~

1:30 New CO<sub>2</sub> standard

5/3 DIAMETER OF SNOW CORES = 2.68 cm  $\pm$  1/2  
 2.74 cm  $\pm$  1/2

$$\text{Avg } d = 2.71 \text{ cm } (6.0271 \text{ m})$$

$$A_{\text{red}} = 0.0005768 \text{ m}^2$$

11:30 1:45 off ⇒ RESET logger clock  
 to MDT

FROM 4/27/00 SNOW SAMPLES

| #COPS | DISTANCE   | BOTTLE NUMBER    | TOTAL WEIGHT           | DRY WEIGHT | WET WEIGHT |
|-------|------------|------------------|------------------------|------------|------------|
| 4     | 400m West  | 1                | 3604.035               | 66.7       | 297.6      |
|       |            | 2                | 326.0                  | 66.5       | 259.5      |
| 5     | 300m West  | 3                | <del>326.0</del> 336.9 | 67.2       | 249.7      |
|       |            | 14               | 318.9                  | 66.1       | 252.8      |
| 4     | 200m West  | 5                | 347.6                  | 66.5       | 281.1      |
|       |            | 6                | 343.3                  | 66.8       | 276.5      |
| 5     | 100m West  | 7                | 410.0                  | 67.3       | 342.7      |
|       |            | 8                | 403.7                  | 66.8       | 336.9      |
| 5     | Tower (0m) | 9                | 375.4                  | 66.4       | 309.0      |
|       |            | 10               | 261.4                  | 66.9       | 194.5      |
| 5     | 100m East  | <del>12</del> 12 | <del>367.0</del> 367.0 | 66.8       | 300.1      |
|       |            | 4                | 262.3                  | 66.8       | 195.5      |
| 5     | 200m East  | 11               | 334.6                  | 67.5       | 267.1      |
|       |            | 13               | 323.6                  | 67.7       | 255.9      |

14  $\Rightarrow$  2 cores in each (~~300m~~)  $\Rightarrow$  28 SAMPLESAT ABOVE  $\Rightarrow$  NEED 35 (AT LEAST 7 more SAMPLES)  $\Rightarrow$  4 BOTTLES  
To get every 50  $\Rightarrow$  NEED 35 more SAMPLES  $\Rightarrow$  18 more BOTTLES  
(BIGGER BOTTLES)

5/3/00 - SPIDER WEAS ON ATC W-axis

SPARKING!!

OFF AT 10:45 AM

ON AT 10:59 AM

NEW TILT:

$$\pm x =$$

$$\pm y =$$

$$V_c = 0.00$$

$$V = -0.108$$

- But Hooked up at 1:00  $\Rightarrow$  MAYBE NOT WORKING?

DOWNLOADED PROF 30 CNR 30

12:00 1:40

SWITCH ASPIRATED SHIELDS  $\Rightarrow$  2  $\Rightarrow$  13:30

DOWNLOADED STILL LOGGING

0223x

[illegible]

| <u>DATE</u> | <u>LOGGER</u> | <u>RT. # (FS NOTE)</u> |
|-------------|---------------|------------------------|
| 5/3/00      | ZPKA (SOIL)   | 894041                 |
| 5/3/00      | CNR 30        | 51237                  |
| 5/3/00      | PRCC 30       | 24085                  |

PT. 4 (5 note)

| Shaw Cores (5/6/00) |       | (1) | (2) | (3) | (4) | (5) |
|---------------------|-------|-----|-----|-----|-----|-----|
| Location            | DEPTH |     |     |     |     |     |
| 50cm W              | 16    | 36  | 48  | 52  | 80  | 43  |
| 30cm W              | 19    | 39  | 58  | 57  | 57  |     |
|                     | 14    |     |     |     |     | 18  |
| 20cm W              | 20    | 36  | 43  | 73  | 42  | 52  |
|                     | 13    |     |     |     |     |     |
| 100cm W             | 15    | 42  | 30  | 60  | 70  |     |
|                     | 11    |     |     |     |     | 48  |
| Tower (6m)          | 18    | 54  | 75  | 43  | 32  | 60  |
| 100cm E             | 17    | 43  | 33  | 26  | 56  | 39  |
| 200cm E             | 1     | 31  | 38  | 28  |     |     |
|                     | 4     |     |     |     | 46  | 29  |



## SNOW CORE / WEIGHTS

| # Cores | DISTANCE         | BOTTLE # | TOTAL WEIGHT | DRY WEIGHT           | H <sub>2</sub> O WEIGHT |
|---------|------------------|----------|--------------|----------------------|-------------------------|
| 5       | 400mW            | 16       | 534.7        | 117.5                | 437.2                   |
| 5       | 300mW            | 19       | 504.3        | 114.8                | 409.2 > 511.4           |
| 5       | 200mW            | 20       | 177.8        | 75.6                 | 102.8                   |
| 5       | <del>100mW</del> | 13       | 535.0        | 109.7                | 425.3 > 550.0           |
| 5       | 100mW            | 15       | 191.6        | <del>47.5</del> 66.9 | 124.7                   |
| 5       | 0m               | 11       | 528.1        | 105.7                | 422.4 > 531.5           |
| 5       | 100mE            | 16       | 175.7        | 66.6                 | 109.1                   |
| 5       | 200mE            | 17       | (*) 479.5    | 100.50               | 524.1                   |
| 5       | 300mE            | 1        | 256.2        | 84.5                 | 374.5                   |
| 5       | 400mE            | 4        | 217.2        | 69.2                 | 171.7 > 39.7            |

weight/area - from 4/27

$$\frac{(400)g}{Area(m^2) (\#cores)} \quad \frac{1}{1000g} = \frac{1kg}{1000g}$$

| #cores | LOCATION | (1) kg/m <sup>2</sup> | (2)                     | (400)g                | 1                       | 1kg |
|--------|----------|-----------------------|-------------------------|-----------------------|-------------------------|-----|
| 4      | 400mW    | 244.46                | 151.60                  | $\frac{89.86}{-3.08}$ | $\Rightarrow (1) - (2)$ |     |
| 5      | 300mW    | 174.24                | 177.32                  |                       |                         |     |
| 5      | 200mW    | 193.34                | <del>184.29</del> 190.7 | 2.64                  | 51.35                   |     |
| 5      | 100mW    | 235.64                | 184.29                  |                       | -7.13                   |     |
| 5      | 0m       | 174.58                | 186.73                  |                       | 41.99                   |     |
| 5      | 100mE    | 171.84                | 129.85                  |                       | 70.5                    |     |
| 5      | 200mE    | 181.35                | 110.85                  |                       |                         |     |

② 18  $\Rightarrow$  Total Heavy  $\Rightarrow$  DIVIDED IN TWO

| #     | TOTAL | DRY WEIGHT |
|-------|-------|------------|
| 18    | 492.1 | 109.0      |
| SPACE | 170.6 | 29.5       |
|       |       | 383.0      |
|       |       | 141.1      |

5/11/00 Snow cones

| Location | Bottle | (1) | (2) | (3) | (4) | (5) | Total weight | Dry weight | kg    |
|----------|--------|-----|-----|-----|-----|-----|--------------|------------|-------|
| new      | 17     | 28  | 33  | 42  | 37  | 45  | 447.4        | 114.9      | 332.5 |
| new      | 15     | 29  | 40  | 54  | 30  | 47  | 496.5        | 105.1      | 391.4 |
| new      | 16     | 30  | 39  | 64  | 44  | 26  | 496.8        | 107.8      | 389.0 |
| new      | 18     | 31  | 10  | 48  | 66  | 43  | 486.5        | 105.8      | 380.7 |
| on       | 20     | 28  | 44  | 19  | 27  | 28  | 391.9        | 106.4      | 285.5 |
| new      | 19     | 32  | 26  | 0   | 49  | 32  | 374.8        | 105.3      | 269.5 |
| new      | 8      | 11  | 27  | 17  | 38  | 0   | 231.9        | 67.3       | 164.6 |

| weight/tree | (3) 5/11/00 |
|-------------|-------------|
| LOCATION    | 5/m         |
| 100mW       | 145.3       |
| 300mW       | 135.71      |
| 200mW       | 134.88      |
| 100mW       | 132.00      |
| 0           | 98.99       |
| 100mE       | 93.45       |
| 200mE       | 57.07       |

/2.884

| (3) - (5) | 5/11 - 5/6 |
|-----------|------------|
| 362.30    |            |
| 41.61     | DOWNWARD   |
| 55.82     |            |
| 52.29     |            |
| 82.74     | UPWARD     |
| 36.40     |            |
| 53.78     |            |

5/19/00

O<sub>2</sub> CALIBRATIONC<sub>SPAN</sub> = 345.7 ppm

| Run | $\phi$ | SPAN   | SAVED |
|-----|--------|--------|-------|
| 1   | 0.006  | 1389.4 | ✓     |
| 2   | 0.008  | 1388.6 | ✓     |
| 3   | 0.009  | 1387.2 | ✓     |
| 4   | 0.010  | 1386.3 | ✓     |
| 5   | 0.011  | 1385.8 | ✓     |
| 6   | 0.012  | 1385.2 | ✓     |
| 7   | 0.013  | 1384   | ✓     |
| 8   | 0.014  | 1383.4 | ✓     |
| 9   | 0.015  | 1383.4 | ✓     |

SAVED

395.43

397.78

398.67

398.72

398.67

398.57

399.10

398.85

398.52

398.73 ± 0.20 (1σ)

Snow Caves

| LOCATION | BATH | Sample Depth | (1) | (2) | (3) | (4) | (5) | Total weight | Dry weight | Moist weight |
|----------|------|--------------|-----|-----|-----|-----|-----|--------------|------------|--------------|
| SPRINT   | 15   |              | 20  | 34  | 37  | 26  | 56  | 433.4        | 105.1      | 328.3        |
| SPRINT   | 20   |              | 10  | 38  | 40  | 32  | 32  | 279.7        | 119.7      | 160.0        |
| SPRINT   | 17   |              | 30  | 46  | 48  | 12  | 22  | 383.5        | 117.5      | 266.0        |
| SPRINT   | 16   |              | 21  | 6   | 48  | 38  | 20  | 404.9        | 117.5      | 287.4        |
| SPRINT   | 13   |              | 40  | 48  | 35  | 8   | 37  | 234.9        | 68.4       | 166.5        |
| SPRINT   | 19   |              | 37  | 9   | 8   | 42  | 31  | 319.0        | 104.5      | 214.5        |
| SPRINT   | 18   |              | 11  | 22  | 22  | 10  | 37  | 237.5        | 105.0      | 132.5        |

5/24/00

12:51  $\Rightarrow$  RE-TULSED ATISONICwas:  $\pm x = 0.060 V = 0.63^\circ$ 

NOW

 $\pm x = 0.834 \Rightarrow 8.72^\circ$  $\pm y = -0.270 \Rightarrow 2.82^\circ$ 

3:15-2:30 SWITCHED FILTERS ON profiler INLETS  
 1  $\rightarrow$  4 (STILL NEED TO DO TOP TWO INLETS)

2:25  $\Rightarrow$  NEW CO<sub>2</sub> STANDARD  $\Rightarrow$  398.7 ppm

4:15

3:30 - ~~4:15~~ SWITCHED DESSICANT TRAP ON  
 PROFILER  $\downarrow$  TOP 2 INLET

JUNK CORRS

| LOCATION | BOTTLE | ①  | ②  | ③  | ④  | ⑤  | dry weight | Wt. weight |
|----------|--------|----|----|----|----|----|------------|------------|
| 400 ml   | 2      | 0  | 0  | 54 | 42 | 0  | 240.8      | 166.9      |
| 300 ml   | 11     | 22 | 32 | 0  | 34 | 0  | 219.7      | 151.8      |
| 200 ml   | 8      | 0  | 0  | 88 | 16 | 0  | 179.5      | 110.0      |
| 100 ml   | 7      | 0  | 0  | 16 | 37 | 0  | 199.5      | 132.1      |
| 0        | 14     | 18 | 0  | 0  | 22 | 16 | 188.3      | 118.3      |
| 60 ml    | 12     | 0  | 0  | 20 | 20 | 0  | 134.5      | 67.0       |
| 20 ml    | 9      | 0  | 0  | 0  | 30 | 0  | 187.6      | 59.8       |

JUNK CORRS ON 5/31/00 (134 km)  
 only 1 sample AT 500 ml

DEPTH = 18 cm

Total weight = 92.3 g

DRY weight = 66.6 g

H<sub>2</sub>O weight = 25.7 g



5/25/00 NEW PROGRAM RUNNING

AT 14.5m  $\Rightarrow$  11:54 AM

Put up new dual radiometer mount at 16m

REBS #1 RUNNING AT ~ 4:30 PM

NO VENTILATOR

⊗ Looks like #2 is NOT RUNNING  $\Rightarrow$  THOUGHT IT  
 STOPPED - NEED TO TRACE LINE!!!

6/8/00 From Excel Spreadsheet

| Period                   | DAILY Energy From Snow Melt | # DAYS | TARGET<br>Snow<br>DAY |
|--------------------------|-----------------------------|--------|-----------------------|
| Apr 27 - May 6 129 - 118 | 15.1 W <sub>W-2</sub>       | 9      | 8                     |
| May 6 - May 11           | 39.6 W <sub>W-2</sub> (↑)   | 5      | 4                     |
| May 11 - May 19          | 15.7 W <sub>W-2</sub>       | 8      | 5                     |
| May 19 - May 28          | 27.2 W <sub>W-2</sub>       | 5      | 5                     |
| May 28 - May 31          | 21.2 W <sub>W-2</sub>       | 7      | 6                     |

6/9/00

New Ø AIR

Is running - 10:30 AM

SECURED - WAS RUNNING TARGET #7

NET BIAS

7.5

2.0

SIGNAL

.9

.9

SECURED ON AT 11:00 AM; TARGET #37

✓ Datalogger Download Status 974396

23x9

CMR

PROFILER

Downloaded AT 1:30 PM

6/14 10:10 → Sec'd off  
new target #39

Have run at  
PMT bias of 7.5V  
8 7.0V

~~2:55~~ 1.

Time  
10:28

12:10

12:38

✓ 1:43

✓ 2:15

0 2:47

3:33

3:57

PMT BIAS  
6.0

7.0

7.0

7.0

7.0

7.0

7.0

7.0

GAIN  
7

7.0

7.0

7.0

7.0

7.0

7.0

7.0

FC  
7

40 turns left

40 turns right (120°)

(Voltage down to 4.5) 40 more turns right (120°)

(Voltage down to 4.5) 40 more turns right (120°)

(Voltage down to 4.5) 40 turns left (120°)

(Voltage down to 4.5) 40 turns right (120°)

(Voltage down to 4.5) 40 turns right (120°)

10~ Hg.

10:40

12:10

~ 1:30

2:40

⇒ one vent. stop off

⇒ other vent off

⇒ prep. off

⇒ prep. back on

1:30-2:30 Moved lower prep. up 1 m

(noticed at 4:00 PM - doesn't seem to be working)

NEED TO CHECK THIS OUT!!!

6/21/00

REMOVED QUACKER & HUSSTER  
 12:30 - 12:50 PM

15m propane - power had been disconnected  
 BACK ON AT 1:30 PM

1:30  $\Rightarrow$  DC POWER RUNNING  
 KR HIGH & PROPRANE  
 BOTH REBS VENTURERS OFF !!  
 SECOND PUMP OFF !!

(\*) NOTE WATCH 25k propane wind speed  
 LOOKS LIKE IT MAY BE BAD !!  
 WIND DIRECTION IS OK !!

1:45 - CR21X OFF

CENTRAL

|        |     |        |                          |     |          |
|--------|-----|--------|--------------------------|-----|----------|
| (1) H  | WHT | RAY    | RED                      | #12 | C2-GRN   |
| (2) L  | BLK | 25     | BLK                      | G   | C3-BLK   |
| (3) H  | GRN |        |                          |     | Red +12V |
| (4) L  | BLK |        |                          |     | BLK-G    |
| (5) H  | WHT | RAY    | $\Rightarrow$ Red +12V   |     |          |
| (6) L  | BLK | 15W    | $\Rightarrow$ BLK-G      |     |          |
| (7) H  | WHT | Vas-#  | $\Rightarrow$ Red - +12V |     |          |
| (8) L  | BLK |        | BLK-G                    |     |          |
| (9) H  | WHT | Vas-#  | $\Rightarrow$ 77W        |     |          |
| (10) L | BLK |        |                          |     |          |
| (11) H | WHT | Vas-#  |                          |     |          |
| (12) L | BLK |        |                          |     |          |
| (13) H | RED | PTB107 |                          |     |          |
| (14) L | BLK |        |                          |     |          |

Now 23k

RUNNING AT

12:30 PM

DATA

WHT - +12V  
 GRN - G

OK !!

(8) Note at 3:00-3:30 → spike in PSD of K<sub>2</sub> h<sub>2</sub>g  
was gone. Either REBS ventilator or Secuod

pump was problem.

(Guessing REBS ventilator - since remaining 1 ventilator  
shifted that spike to higher freq.)

6/23/00 Power Outage  
1800, 6/20 → ~11:30 6/23  
Start in main unit

Secuod Pump on - ~1:30 PM

~~Secuod~~ SWITCHED OUT Secuods

(#2 new installed)  
100) ~~new~~ CAPACITOR PLACED IN  
GAIN CIRCUIT.

6/26/00 -

new p AIR

new calib. STANDARD

| RUN | ZERO | SPAN  |     | JANACE |     | P    | S/G  | ppm                     |
|-----|------|-------|-----|--------|-----|------|------|-------------------------|
|     |      | T     | A   | T      | A   |      |      |                         |
| 1   | 10   | 28.16 | 812 | 28.16  | 811 | 1548 | 1548 | 398.9                   |
| 2   | 11   | 28.19 | 812 | 28.19  | 811 | 1548 | 1548 | 399.62                  |
| 3   | 12   | "     | 812 | "      | "   | 1550 | 1550 | 399.96                  |
| 4   | 11   | "     | 812 | "      | "   | 1548 | 1548 | 399.62                  |
| 5   | 10   | "     | "   | "      | "   | 1547 | 1547 | 399.58                  |
| 6   | 11   | "     | "   | 28.16  | "   | 1548 | 1548 | 398.72                  |
| 7   | 10   | 27.65 | 814 | 27.69  | 813 | 1547 | 1547 | 398.72                  |
| 8   | 10   | 27.97 | 813 | 28.03  | 813 | 1547 | 1547 | 399.29                  |
|     |      |       |     |        |     |      |      | 399.41 ppm              |
|     |      |       |     |        |     |      |      | ±0.4                    |
|     |      |       |     |        |     |      |      | new std. air => 300 ppm |



6/27/00 Looking AT Power Spectra -

- ① K- hygrometer - SPIKE AT 3.4 Hz appears to be coming from the Sealed pump (or possibly one of Heron's pumps  $\Rightarrow$  need to check this - find out times when Heron is running)

- ② Sealed's - put 1  $\mu$ F capacitor in GAIN feed back loop  $\Rightarrow$  appears to be "over-filtering"  $\Rightarrow$  now we can cut back the resistances.

③ DO 300 CORRELATIONS IN THE TIME SERIES

mat -  
prof 6x30  
ENR 6x30

7/5/00 Sealed pump off AT 1:30  
(Heron's pumps still on)  
Profiler OFF - 1:30  
ON - 1:38  $\Rightarrow$  new desiccant

23XA  $\Rightarrow$  JURY STILL  
FS MPTR = 1,066,290

21:57  $\Rightarrow$  DOWNLOADED  $\Rightarrow$  net 30s  
FS MPTR =

~~Put in~~ new program - ~~BOEC~~ BOEC calls off  
AT 1:30 PM

Profiler - DOWNLOADED 3:07 PM

$\Rightarrow$  looks like it collected ALL THE DATA!  
FS MPTR =

✓ New Fest 23 program = 3:25-3:28

(160)

7/19/00 ATI sonic mounted AT 5m on  
 little tower  
 - Running AT ~ 12:00 PM  
 - New TECO filter - 12:00 PM  
 - Manual  $\phi$ , span of Profiler

$$P_{STP} = 399.4$$

~~2700~~ MANUAL AT 1:30 PM

### SAMPLING

|    | Pressure | Flow       |
|----|----------|------------|
| 21 | 0.432    | ~630       |
| 22 | 0.428    | 623 ml/min |
| 23 | 0.431    | 647        |
| 24 | 0.430    | 600-625    |
| 25 | 0.436    | 600-630    |
| 26 | 0.429    | 620-650    |

~~SAMPLE P~~  
 27  
 28  
 29

Reset needle valve & sonar flow  
 Flow 21 ~ 460 ml/min

| b  | Pressure |  |
|----|----------|--|
| 21 | 0.638    |  |
| 22 | 0.638    |  |
| 23 | 0.639    |  |
| 24 | 0.637    |  |
| 25 | 0.639    |  |
| 26 | 0.634    |  |

$$ZERO = 0.024$$

set to 0.000

too slow

Reset AGAIN

$$P = 0.972 \text{ kg} \quad \text{still too slow}$$

BACK TO BEGINNING

$$P(46) = 0.936$$

$$F = 640 \text{ ml/min}$$

$$65.7 \text{ kPa}$$

CLOSE TO ZERO AFTER 1 min!!

(OK) ✓

Already tested

New set speed

$T_F$  ~~33.6~~ 33.6

~~7:40~~ ~~2:39:38.5~~  $T_H/T_F = 1.00717$

$^{17}O_2 \frac{I_0}{I_1} = \frac{408.3}{402.3} \Rightarrow 209.51 \text{ mV}$   
TABLE

$P_{open} = 436 \text{ mV}$   $65.64 \text{ kPa}$   
 $P/P_0 = 0.64799$

$V_{acc} = 1357.6 \text{ mV}$

$V_{meas} = 1359$ , set to 1357

BACK ON AT 2:41 PM

7/14/20

2:00 PM - PROCLUT ACC  $\Rightarrow$  LEAK TESTED

NO LEAKS FOUND

PUMPING ON LEVEL 6 ONLY  
NO PROFILES

PUMP SOUNDS LIKE ITS ABOUT TO GO

ON AT 2:30

2:30  $\rightarrow$  2:42 CHANGED FILTER ON CO<sub>2</sub> INLET

PLACED ABOUT 7" FROM SONIC PATH

1st OFF AT 2:45

1st BACK ON AT 3:35

1:7500 ON A1 4:10  $\Rightarrow$  INTO  $^{17}O_2$  dig. +  $^{16}O_2$  dig.  
(CHANNEL 10 + 11)

AP

7/18/00 5:14 Spring H<sub>2</sub>(CO<sub>2</sub>) on Level 6

AT NIGHT → NOT A VALVE SWITCHING PROBLEM!

⇒ SWITCHES INLET LINES FOR LEVEL 5 & LEVEL 6  
(10m) (21.5m)

RUNNING ON AUTO AT ~4:00PM

— CAMPBELL SONIC AT 1.5m ⇒ RUNNING ~3:00AM

— EC pump - RS 3:10 - 3:25PM (FAN REPAIR)

7/20/00 RAINING W/ profiler

Profiler off = ~~10:20~~ ~10:30 AM

|               | Pressure Voltage | T     | SIGNAL (mV) |
|---------------|------------------|-------|-------------|
| <del>21</del> | <del>0.570</del> | 33.66 | 1314        |
| 22            | 6.569            | 33.5  | 1312        |
| 23            | 0.571            | 33.3  | 1310        |
| 24            | 0.572            | 33.2  | 1304        |
| 25            | 0.573            | 33.0  | 1318        |
| 26            | 6.567            | 33.68 | 1308        |

Pressure ⇒ WAY LOW ON SPANED P = 480mV (Reset to ~580mV)  
CHECK READ - "0.0067 (Adjusted to 0.000)

BACK ON LEVEL 5 (TOP)

ONP No IN 2/

25 581

21 576

SWITCHED TO L2 ⇒ (21 & 22 are reversed ???)

ONLY GOES DOWN TO 1155

⇒ DOWN TO 0.667 W70

[DESSICANT TEMP. !!]

Something seems very WRONG!!

500  
500

PULSED VP  
70 1345

1333

3203

31.8



\* REALIZED MAIN PUMP WAS DEAD!!

SWITCH OUT & PUT SEEDED PUMP (SAME KIND OF PUMP)  $\Rightarrow$  ALSO SWITCHED OUT THE SMALL SAMPLING PUMP.

BACK ON AT 2:15  $\Rightarrow$  TESTED W/ UHP N<sub>2</sub> TEE-ED ACROSS LEVEL 2  $\Rightarrow$  WORKED PERFECTLY  
 Ⓢ LEVELS 1 & 2 ARE NOT SWITCHED

Ⓢ SHOULD LOOK FOR CHEAP ROTAMETER TO MEASURE  
 (MAIN FLOW RATE!! (UP TO 6-20 LPM))

$\rightarrow$  MAYBE ONE FOR SAMPLE FLOW TOO!

Ⓢ BACK ON AT 2:30 PM

LEVELS 5 & 6 ARE STILL SWITCHED!!

Flow rate  $\sim 350 \text{ cm}^3 \text{ min}^{-1}$

FLUSHED DESSICANT TRAP IN  $\sim 45 \text{ sec}$  (UP N<sub>2</sub> AT INLET #2)

Pressure  $\sim 496 \text{ mV}$

Ⓢ Adjusted span pressure as well!!

7/26 BACK FROM VACATION

2 THINGS

- ① EC CO<sub>2</sub> reading TOO HIGH OF A VOLTAGE
- ② PROFILER LOOKS LIKE IT GOT WORKING THE NIGHT OF 2/5

7/27/00 Source of BOTH problems

Power went out TO BOTTOM circuit from  
15:43 ON 7/21 TO  
~12:00 ON 7/24

WHEN CAME BACK ON  $\Rightarrow$  something must have  
gotten into reference cell of EC CO<sub>2</sub>

ZERO ~ 70 ppm  $\Rightarrow$  CAL ON; ZERO on the pot  
1:30  $\Rightarrow$  EC OFF TILL 2:00

BLASTED VAPOR N<sub>2</sub> BACK THRU REFERENCE CELL  
+ CHOPPER

$\Rightarrow$  SIGNAL CAME BACK TO NORMAL!!

PRODUCED CUT OFF AT 11:30

BACK ON AT 2:00; MIGHT BE OK

- STILL HAVE weird problem w/ TOP inlet

SWITCHED L5 + L6 BACK TO ORIGINAL POSITIONS!  
⊗ MOVE L6 DOWN TO L5 AND THEN

NEW CO<sub>2</sub> STANDARD

CO<sub>2</sub> STD = 345.4 ppm

| Run | ZERO Value (mV) | SPAN   |       | Signal | PRESS |      | Temp  | COND.  |                  |
|-----|-----------------|--------|-------|--------|-------|------|-------|--------|------------------|
|     |                 | Temp   | Press |        | Press | Temp |       | Cond.  | Temp             |
| 1   | 8               | 24.863 | 832   | 1392   | 826   | 1549 | 27.58 | 400.5  | 27.58            |
| 2   | 11              | 24.9   | 827   | 1393   | 826   | 1555 | 28.16 | 400.19 | 28.16            |
| 3   | 12              | 28.3   | "     | 1392   | 827   | 1556 | 28.40 | 400.50 | 28.40            |
| 4   | 12              | 28.56  | 827   | 1392   | "     | 1557 | 28.72 | 400.47 | 28.72            |
| 5   | 13              | 28.876 | 827   | 1397   | "     | 1557 | 28.87 | 401.01 | 28.87            |
| 6   | 14              | 28.9   | 826   | 1392   | 828   | 1556 | 28.94 | 400.41 | 28.94            |
| 7   | 14              | 29.21  | 828   | 1391.4 | 828   | 1554 | 29.22 | 400.89 | 29.22            |
| 8   | 14              | 29.23  | 828   | 1391   | 828   | 1555 | 29.27 | 400.50 | 29.27            |
|     |                 |        |       |        |       |      |       |        | 400.45 $\pm$ 0.3 |
|     |                 |        |       |        |       |      |       |        | ppm              |

⊗ [ New desiccant in desiccant - 3:15-3:30  
New filter on top inlet  $\Rightarrow$  moved closer to tower!

7/28/00  $\Rightarrow$  Level 2 ON prefilter screenings up  
(MAN. SWITCH ON  $\Rightarrow$  TURNED OFF  $\approx$  11:00)

$\Rightarrow$  New O<sub>2</sub> gas  $\Rightarrow$  3:35 PM

8/11/00

Li7500 DAC setup

2V  
O  
O

H<sub>2</sub>O  
CO<sub>2</sub>

5V  
500  $\mu\text{mol}/\text{m}^3$  // 800  $\mu\text{mol}/\text{m}^3$   
20  $\mu\text{mol}/\text{m}^3$

CHANGE TO

~~433~~ = 2.86  $\mu\text{mol}/\text{m}^3$  // CO<sub>2</sub> (336 ppm)  
100  $\mu\text{mol}/\text{m}^3$   
280 = ~~5.05~~ 5.05  $\mu\text{mol}/\text{m}^3$  // H<sub>2</sub>O  
100  $\mu\text{mol}/\text{m}^3$

9.8  $\mu\text{mol}/\text{m}^3$   
2.450

DOWNLOADED 23A  $\Rightarrow$  FSMOTR = 1196499

TEAS RADIOMETERS  $\Rightarrow$  OFF at 1:35

8/14/00

TEAS #1 ON AT 11:00 AT 26 m  
TEAS #2 ON AT 12:00 AT 17 m (16 m?)

Took NR LITE Down AT 12:00 PM

2:00-3:00 PM  $\Rightarrow$  K. Lyy  $\downarrow$  1:750 OFF  
CALIBRATED 1:7500: TEAS OFF BY  $\approx$  7:50 PM

BACK ON AT 3:00 (may be 2:30)  
SPAN OFF  $<$  1.5 ppm

8/22/00 New EC meter line &amp; filter

EC system off 12-12-30

Man. zero &amp; span

(F<sub>out</sub> = 7.30 sand at low!)  
P = 35 kPa

(Refer to After new meter line!)

SHOULD I REPLACE Heat EXCHANGER?

- Grounded not data logger

- CHECKED 16m propane cable & extension looked OK  
EARTH GROUND IS OK TOO!!

- 1:30-1:45 → new designation in profiler

New cal. gas

O<sub>2</sub> = 345.4 ppm

SPAN

SAMPLE

| ROW | BARO | T     | P                  | mV     | T     | P   | SLAB | CONF. (ppm) |
|-----|------|-------|--------------------|--------|-------|-----|------|-------------|
| 1   | 202  | 33.6  | <del>828</del> 828 | 1387   | 33.56 | 828 | 1553 | 402.31      |
| 2   | 24   | 33.12 | "                  | 1387 ✓ | 33.42 | "   | 1555 | 402.49      |
| 3   | 24   | 33.34 | "                  | 1387 ✓ | 33.31 | "   | 1656 | 402.58      |
| 4   | 24   | 33.24 | 828                | 1388   | 33.21 | 829 | 1657 | 402.79      |
| 5   | 25   | 33.14 | 830                | 1389   | 33.12 | 829 | 1558 | 402.68      |
| 6   | 25   | 33.07 | 829                | 1389   | 33.04 | 829 | 1558 | 402.58      |
| 7   | 24   | 32.92 | 830                | 1389   | 32.88 | "   | 1557 | 402.72      |

402.54 ± 0.17  
(1σ)

8/24/00 New AIR

New cal. TANK - 10:30 - 11:00

Also - Profiler pressure sensor HARD BARO CONNECTION

Fixed: 1:18 PM

During down time: P<sub>env</sub> ~ 0.376 mV

8/25/00

- Replaced Copper Heat Exchanger in EC SYSTEM  
12:10 - 12:20

- CHECKED GROUNDS ON loggers



653  
 SWITCHED TO  
 DATA LOGGING  
 CO. d. g. CHANNEL  
 LAST CHANNEL

Hooked up Airt 70 ZSD < > reads between  
 357-364 ppm (wet but - but could be better)  
 $\Rightarrow$  Noted  $CO_2$  zero coefficient ( $Z_{CO_2}$ ) = 0.85  
 SHOULD BE BETWEEN 0.9-1.1  
 $\Rightarrow$  Need to RE-ZERO carefully!!

12:30 - 1:15  $\Rightarrow$  move AT1 to 5.75 m  
~~1:15-1:30~~ = ON small tower

1:15 - 1:45  $\Rightarrow$  SWITCHED RHT AT 8m TO point  
 ON other side of tower.

THERMOCOUPLES = 3 full  
 1 cut

23x IS RUNNING 2 AM416  
 (1) 8 Tcs AT SOUTH TOWER  
 (2) 15 Tcs AT Middle tower

BOTH JUST USING 1 CHANNEL ON 23x!!

(\*) mostly need more thermocouples!!

8/29/08  $\Rightarrow$  10:30  $\Rightarrow$  REVERSED & SPANNED EC SYSTEM  
 -HAD BIG ZERO SHIFT (~30ppm!) - New Cu tubing?  
 ALSO NOTED CELL PRESSURE IS MUCH LOWER THAN  
 usual (40 kPa)  $\Rightarrow$  IS MY NEW FILTER TOO  
 MUCH OF RESTRICTION? (PEROSPAN WERE 46 kPa  
 WHICH IS NOT UNUSUAL LOW!)

11:45-12:15  $\Rightarrow$  K<sub>2</sub> tag off WHILE ZEROING  
 12:50 // put 500g lime TRAP JUST PRIOR TO CELL  
 zero for  $CO_2$  NOT far off (~4ppm)  
 $Z_{CO_2} = 0.85$  (still!)  
 $Z_{H_2O} = 1.08$  (was 1.08)  
 WATER WAS QUITE A BIT off (2500)  
 DID NOT CHECK SPAN

1:30-2:00 @, span test on EC system

③

| Time   | Gas    | Flow | Pressure |
|--------|--------|------|----------|
| < 1:30 | SAMPLE | 6.21 | 40 kPa   |
| 1:32   | Ø      | 7.84 | 46.9 kPa |
| → 1:42 | SPAN   | 7.82 | 46.9 kPa |
| 1:47   | SAMPLE | ?    | ?        |

④ BT my watch -- wrong ahead of data

need to check filters + pump (is pump going bad)

2/1/00 Pressure still low decreasing  
in EC system - as it  
pump on BAD filter

$F_{tot} = 5.89$   $P = 38.9$  kPa

↳ suggests BAD filter on obstruction,  
pump is still pulling down pressure.

1:16 - EC off

hooked up old inlet w/7 filter

old inlet + filter  $F = 5.79$ ,  $P = 38.4$  kPa  
take filter off  $\Rightarrow$  NO CHANGE!

no inlet tubing  $\Rightarrow F = 6.91$ ,  $P = 43.4 \Rightarrow$  still low!!

bypass heat exchanger + solvent

$F = 5.96$   $P = 39.667$

now it starts to leak like pump

new 2nd stage filter  $\Rightarrow$

$F = 8.71$

$P = 51.38$

BACK ON AT 1:29

$F = 8.51$   $P = 50.3$  kPa

BAD

FILTER

2nd stage

THATS

THAT

9/20 HAD LOST ITS MIND - RESTARTED & everything seemed OK

DOWNLOADED SOIL DATA

FSMPTF = 1271006

PUT IN NEW PROGRAM - TAKE OUT 15 MIN MEASUREMENTS  
(was sep flow)

2100

~~1-4-80~~ → 4:20 Moved profile INLETS  
TO SMALL TOWER - HAD TO INCREASE  
TUBING LENGTH SAME.

SAME HEIGHTS EXCEPT L4 ~ 5.5m  
(NOT 5.0m)

OTHERWISE L1 = 0.5 m

L2 = 1 m

L3 = 2 m

L4 = 5.5 m

L5 = 10 m

L6 = 21.5

PRESSURE CHECKED OK

9/5/00 - Voltage Divider for DOUBLE profile!

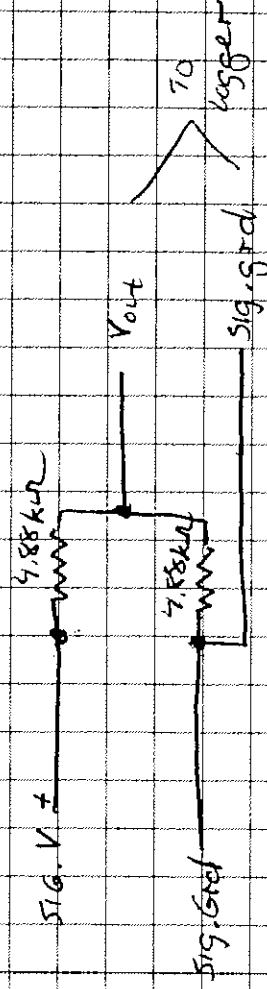

TESTING

|       | V <sub>IN</sub> | V <sub>OUT</sub> | V <sub>OUT</sub> |
|-------|-----------------|------------------|------------------|
| 1002) | 11.45           | 5608             | 2.0158           |
| T     | 26.43           | 1310             | 2.0176           |
| P     | 75.587          | 375              | 2.0157           |
|       | 170.30          | 857              | 2.0187           |

RANGE  
755-4432mV

n = 8 V

2.0236

132.5

656

2.0200

7.980

3.95

2.0200

4.43032

2.20

2.015

2.018 ± 0.003

9/7/00 Profiler has been on "MANUAL"  
 since ~ Aug. 22!!  
 F ~ 320  $\mu\text{m}$   
 (New!!)

Pressure seems low

| level | P     | Altitude     |
|-------|-------|--------------|
| 1     | 90 mV | Altitude cut |
| 2     | 90 mV | NO change    |
| 3     | 91 mV |              |
| 4     | 89 mV |              |
| 5     | 98 mV |              |
| 6     | 92 mV |              |

(\*) Pumped around Dessicant Trap

PA ~ 644 mV  $\Rightarrow$  THAT'S THE PROBLEM  
 NEED NEW DESSICANT TRAP

Left running AT 10:48  $\Rightarrow$  NEED TO GET  
 MORE DESSICANT

10:53 - 10:55  $\Rightarrow$  Put more balls into EC line  
 F before = 8.50 slpm  
 F after = 8.40 slpm  $\Rightarrow$  NO big change!

Turnmeter  
 (\*)  $2^\circ \Rightarrow 0.191$   
 $6^\circ \Rightarrow 0.574$

11/15 Profiler dessicant switch

9/8/00 - 11:04  $\Rightarrow$  Profiler dessicant switch  
 11:20  $\Rightarrow$  Underexposed CSAT off  $\Rightarrow$  ADDING  
 4m CSAT-3

Output  $\Rightarrow$  10 THINGS!!  
 Wind speed  $\Rightarrow$  final storage 552

11:49  $\Rightarrow$  CHANGED prep. config cover - config, etc  
 REPAIRING BOTH CSAT SWs, CS



Powls check

Duck 2.1A  
Bottom 5A  
M.D. 2.5A  
Top 1.1A

④ NO Horn pumps

Thru = CNR = pulled in at 2:30

Back cyl at 3:00

TILT =  $\pm x = 0.073$  (WANT near ZERO)  
 $\pm y = 0.177$  ( $\sim 20^\circ$ )

$\pm x$  TILT =  $0.76^\circ$

$\pm y$  TILT =  $1.872^\circ$

DIAGRAM

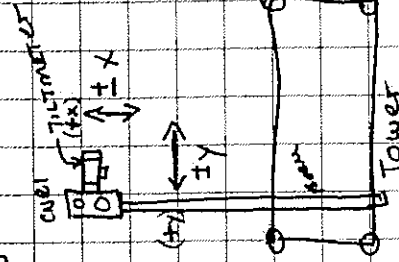

9/15/00

— 117500 sqm cable —

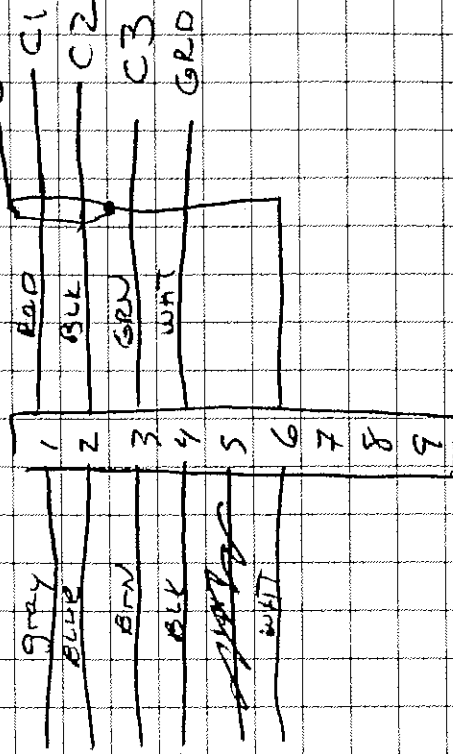

Sept. 14  
Tered outputting  
H. res. Campbell  
DATA in mod. P.M.  
Screwed every thing up!!

VOLTAGE DIVIDER FOR EC SYSTEM  
(SAME AS ON 8/5/00 for pre-filter except  
 $R = 4.96 \text{ k}\Omega$ )

| $V_{IN}$          | $V_{OUT}$ | $V_{OUT}/V_{IN}$         |
|-------------------|-----------|--------------------------|
| 1677.6            | 836       | 2.0306                   |
| <del>1557.7</del> | 472       | 2.0290                   |
| 961.3             | 473       | 2.0323                   |
| 780               | 382       | <del>2.0381</del> 2.0419 |
| 2892              | 1419      | 2.0381                   |
| 2898              | 1420      | 2.0408                   |

$$\text{Avg} = 2.0354 \pm 0.0055$$

$$(0.27\%)$$

1:00 PM began logging  
Digital  $\text{CO}_2$  output from EC 6262

[ 0 V  $\Rightarrow$  300 ppm  
5 V  $\Rightarrow$  500 ppm ]

ATTEMPT TO REKAT SENSITIVITY RELATIVE TO  
MEASURING ANALOG VOLTAGE

- 2:30 cleaned K optics

< 3:00 moved Li7500 close to tower  $\rightarrow$  hooked up  
50m, BUT doesn't seem to be working  
properly

- OLD DIGITAL DATA  
STARTED ON 1/7/99 0-5V; 300-850 ppm  
Robably until 7/9/97 WHEN SWITCHED IRGAS

2.0354  
0.27%  
2.0354  
0.27%  
2.0354  
0.27%

9/18/00

11:00  $\Rightarrow$  Disconnected DAC output on EC 6262

① Power Spectra looks very bizarre

②  $\Rightarrow$  Reset Li7500  $\Rightarrow$  spikes on DACsWent away - SDM still not working  
(Recheck!!)11:45-12:00 Put Voltage Divider in EC CO<sub>2</sub> VOLTAGE  
Drops from 1000  $\Rightarrow$  800 mV③ Oshoan shows that we are now getting  
THAT 0.1 mV THAT WE WANT!!NEW CAR STANDARD  
using Refers 6262

| Run | $\phi$ | SPAN  |
|-----|--------|-------|
| 1   | 0.16   | 345.3 |
| 2   | 0.27   | 345.5 |
| 3   |        |       |
| 4   |        |       |
| 5   |        |       |
| 6   |        |       |

| SAMPLE | ppm |
|--------|-----|
| 401.60 |     |
| 403.20 |     |

C<sub>SP</sub> = 345.4 ppmtoo bad!!  
unstable up!  
SHOULD BACK  
6251

7/21

| Run | $\phi$ (mV) | SPAN | P (mV)                   | T (mV) | S <sub>g</sub> (mV) | Sample | T    | S <sub>g</sub> | ppm |
|-----|-------------|------|--------------------------|--------|---------------------|--------|------|----------------|-----|
| 1   | 3           | 727  | 20.15                    | 1383   | 727                 | 20.6   | 1555 | 403.32         |     |
| 2   | 2           | "    | 21.1                     | 1378   | 726                 | 21.4   | 1548 | 403.43         |     |
| 3   | 0           | 727  | <del>21.907</del> 21.907 | 1373   | 727                 | 22.3   | 1542 | 403.14(1)      |     |
| 4   | 2           | 728  | 22.68                    | 1373   | 728                 | 22.86  | 1544 | 403.74         |     |
| 5   | 2           | 727  | 23.20                    | 1371   | 726                 | 23.40  | 1542 | 403.82         |     |
| 6   | 4           | 727  | 23.81                    | 1371   | 727                 | 24.00  | 1541 | 403.70         |     |
| 7   | 3           | 727  | 24.35                    | 1368   | 727                 | 24.47  | 1537 | 403.28         |     |
| 8   | 3           | 727  | 24.73                    | 1367   | 727                 | 24.83  | 1537 | 403.74         |     |

403.56  $\pm$  6.28

54221.2

$$366.04 \pm 0.25$$

Deans other (small tank)

445.89

2

20



9/26- 1:7500 IN TRAILER

Ready light keep blinking  
every 20-30 sec

Hooked up SDM  $\Rightarrow$  BANDWIDTH set wrong  
Also  $\Rightarrow$  conversion does funny things!!

$\Rightarrow$  ZERO  $\Rightarrow$  BOTH CO<sub>2</sub> + H<sub>2</sub>O look OK  
SPAN CO<sub>2</sub> (OFF BY ~0.2 ppm)

$\hookrightarrow$  used Scott 345.1 ppm  
THEN ADDED DUANE WIND STANDARD  
measured 368.3  $\Rightarrow$  right on

BACK TO ZERO  $\Rightarrow$  OKAY!!  
TARGET

#70 WAS DAC

842  $\Rightarrow$  SECUR

10  $\Rightarrow$  empty

11, 12  $\Rightarrow$  DAC channels

getting back to  
looks OK, THEN

NO  $\Rightarrow$  -1.878

H<sub>2</sub>O  $\Rightarrow$  -18

164  $\Rightarrow$  -1.65

$\Rightarrow$  7.8176

(x) or (-)

10:15-10:31  $\Rightarrow$  DOWNLOADED net logger

10:31-11:00  $\Rightarrow$  SWITCHED 6262 for 6251 (Serial 1308)

(S) Note  $\Rightarrow$  remember THIS IRGA STILL

HAS SAFETY SWITCH HOOKED UP!!

IF power goes out, have to go flip

switch

11:16-11:44  $\Rightarrow$  DOWNLOADED prof logger

11:50-12:00  $\Rightarrow$  New test 234 program // no 50M

for 1:7500, changed voltage ranges.

1300-13:30  $\Rightarrow$  DOWNLOADED CNR

$\rightarrow$  over

At the same time - changed TIME TILT

$$\frac{I_x}{I_y} \Rightarrow \frac{0.081 \checkmark}{0.316 \checkmark} = \frac{0.85^\circ}{3.31^\circ}$$

1:30  $\Rightarrow$  DISCONNECTED L:7500, TOOK BACK TO TRAILER

10/2/00 DOWNLOADED SOIL LOGGER  
FSMPR = 64,908

- TOOK OUT GROUND LUGS ON 3 LEGS OF BASE SECTION

10/4  $\rightarrow$  PUT BRACE ON TOWER LEG. NEW  $\phi$  AIR

10/9 PUT L:7500 BACK UP  $\Rightarrow$  RUNNING AT 3:30PM  
Running on both SDM & DACs

FAST 232 output now:

u v w tc, diag. 03 STAT. 11 coded. tee, p. cc  
h20. ec, h20. k- EC flow, h20. dig, co2. dig  
CO2. mmol h20. mmol

SDM outputs  
ANALOG outputs

$\Rightarrow$  AT 3:30  $\Rightarrow$  NOTICEO L:6251 IN EC SYSTEM SOUNDED  
BAD  $\Rightarrow$  CHOPPER MOTOR PERHAPS,

DIED AT  $\sim$  3:45PM

SWITCHED OUT IRGA'S  $\Rightarrow$  ~~put~~ put 6262 (IRGA 638)  
BACK IN  $\Rightarrow$  has NEW calibration  
(\*) H2O channel back on

(\*) DROPPED 6251 (IRGA 308) OFF TOWERS (oops!)  
well-time to send in BACK ANYWAY.

$\Rightarrow$  6262  $\Rightarrow$  RUNNING AT 5:00 ( $\phi$  & SPAN)

10/16 Afternoon2:39 - EC system off for pressure  
CALIBRATION

| T.   | RESTRICTION        | Downstream | MPs RAW | MPs water |
|------|--------------------|------------|---------|-----------|
| F    | Licor Voltage      | Pres       | UPST.   | LP        |
| 7.06 | -191               | 56.20      | 4.52    | 178.4     |
| 6.50 | - <del>207.0</del> | 58.08      | 4.54    | 183.0     |
|      | -62.17             |            | 4.84    | 171.3     |
| 4.80 | 242.8              | 62.81      | 4.84    | 195.2     |
| 3.49 | 450.9              | 65.97      | 5.05    | —         |
| 1.79 | 652.6              | 69.63      | 5.25    | —         |

II - RESTRICTION UPSTATION -

|      |       |       |      |      |       |       |
|------|-------|-------|------|------|-------|-------|
| 6.95 | -996  | 43.98 | 3.53 | 3.26 | 142.4 | 131.6 |
| 5.50 | -1406 | 37.75 | 3.02 | 2.81 | 122.0 | 113.6 |
| 4.46 | -1732 | 32.86 | 2.62 | 2.45 | 106.7 | 99.1  |

ATM Pressure

|      |       |       |      |      |   |   |
|------|-------|-------|------|------|---|---|
| 0.55 | 757.5 | 70.64 | 5.36 | 5.36 | — | — |
|------|-------|-------|------|------|---|---|

O.P. CONDITIONS

|      |        |       |      |      |       |       |
|------|--------|-------|------|------|-------|-------|
| 8.40 | -568.5 | 50.54 | 4.06 | 3.73 | 163.9 | 150.6 |
| 7.41 | -277.2 | 54.92 | 4.33 | 4.09 | 174.9 | 165.2 |
| 6.77 | -136.6 | 57.04 | 4.46 | 4.27 | 180.3 | 172.3 |
| 7.27 | -385.6 | 53.25 | 4.23 | 3.95 | 176.7 | 159.3 |
| 5.88 | 53.9   | 59.94 | 4.65 | 4.50 | 187.8 | 181.8 |

BACK ON-LINE AT 3:30  
Pressure off

conversion to kPa  
 1 Torr =  $\frac{101.3 \text{ kPa}}{760 \text{ Torr}}$  = 0.1333 Torr

Rotameter 1.1 Volt  
 (Amp.) 0.977  
 17.5 394  
 10 569  
 23 270  
 32-33 -335

AKS UP DN  
~~0.977~~ 5.30  
 5.97 4.96  
 5.16 5.15  
 4.80 4.81  
 4.11 4.10

BACK CN - 3.54  
 Rotameter = 17

MORNING

11-11:20  $\Rightarrow$  New net code, moved Prep AND  
 wind speeds to different channels

Now  $\Rightarrow$  channel 9  
 16m  $\Rightarrow$  channel 10  
 11:20 Reset 6.7500  $\Rightarrow$  still spiking

11:30 New Tilt on CNR Radiometer  
 It was  
 $\pm x = 0.088^\circ \Rightarrow 0.92^\circ$   
 $\pm y = 0.253^\circ \Rightarrow 3.06^\circ$   
 changed to  
 $\pm x = 0.085^\circ \Rightarrow 0.89^\circ$   
 $\pm y = 0.519^\circ \Rightarrow 5.43^\circ$

11:30-11:50 Profiler OK  
 - new dessicant  
 - Also put on Rotameter in place of  
 Needle valve

Rotameter  
 18 Flow (per hour)  
 $\rightarrow$  513 ml/min

11:15-1:50 Replumbed Ref.  $N_2 \Rightarrow$  now goes thru  
 profiler to EC system



10/18/00 New CAL STANDARD  
(using Peters 6262)

340 = 345.4 ppm

| RUN | IRG (ppm) | SPAN (ppm) |
|-----|-----------|------------|
| 1   | 0.0       | 345.4      |
| 2   |           |            |
| 3   |           |            |
| 4   |           |            |
| 5   |           |            |
| 6   |           |            |
| 7   |           |            |

⊗ Peter's IRGA is screwed! Very UNSTABLE  
WILL NEED TO RE-CALIBRATE THIS STANDARD  
LATER!

New 510. 11:00 AM  
10:55-10:58 manual & V SPAN OF  
EC SYSTEM, Meas. NEW TANK  
TO BE 405.0 ppm (1)

⊗ 11/3/00 10:30<sup>51</sup> - New TILT ON Radiometer

OLD

$$\begin{aligned} \pm X &= 0.518 = 5.413^\circ \\ \pm Y &= 0.085 = 0.89^\circ \end{aligned}$$

NEW

$$\begin{aligned} \pm X &= 0.660 / 0.650 \\ \pm Y &= 0.085 = 0.89^\circ \end{aligned}$$

6.897 - 6.793

11:10-11:20 ⇒ New filter on EC system  
11:00-12:00 ⇒ New filters on Profile INLETS

~ 8-2 - Reconnected 16 m prop ⇒ seemed to be working  
DIED SHORTLY AFTER  
- Put on new connector ⇒ seemed to be working when  
I LEFT.

① 1:30

DOWNLOADED SOIL LOGGETT CHANGED TIME TO STANDARD TIME!

11/6 ⇒ Apparently 16m wind speed died again few hours after 5:10 PM (?)

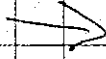

SEAMED TO START WORKING AGAIN

12/1/00 New STANDARD

Span = 375.4

// newly calibrated 6251 (308)

| REV | SPAN |       | P   | COR |            | SAMPLE |     | P    | COR  | CORR (ppm) |
|-----|------|-------|-----|-----|------------|--------|-----|------|------|------------|
|     | ±    | ±     |     | ±   | ±          | T      | T   |      |      |            |
| 1   | 0    | 11.40 | 787 |     | 1414 (504) | 11.88  | 786 | 1607 | 1607 | 411.18     |
| 2   | 0    | 12.58 | 786 |     | 1410       | 12.66  | 786 | 1609 | 1609 | 411.24     |
| 3   | 0    | 12.9  | 786 |     | 1399 (409) | 13.00  | 786 | 1604 | 1604 | 411.73     |
| 4   | 0    | 13.27 | 786 |     | 1408       | 13.35  | 786 | 1595 | 1595 | 409.06     |
| 5   | 0    | 13.7  | 786 |     | 1406       | 13.6   | 786 | 1600 | 1600 | 411.47     |

410.94

± 1.1 ppm

SPAN HIGH

② BIG offset AFTER SPANNING

New std. - 1.30

1585 new CUR FIT

$$\begin{aligned} \bar{x} &= \frac{\text{new}}{\text{old}} = \frac{0.818}{0.920} = 0.888 \\ \bar{x} &= 0.888 \end{aligned}$$

$$\begin{aligned} \bar{x} &= \frac{\text{new}}{\text{old}} = \frac{0.637}{0.920} = 0.692 \\ \bar{x} &= 0.692 \end{aligned}$$

$$\begin{aligned} \bar{x} &= \frac{0.0}{0.0} = 0.0 \\ \bar{x} &= 0.0 \end{aligned}$$

EC MANUAL SPAN

1:40

new profiler pump  
ON AT 2:00

③ TSC

O<sub>3</sub> LINE HAD CURVE DISCONNECTED

AT ~ 8-9 m.!!

12/17/02 - NEW AIR  
- NEW DESSICANT IN POUCH (~10 KG AIR)

12/28/03  
New standard air  
Scott Tank  
~ 500-600 psi

CHECKING LIG 251 => #308  
CHECKING SCOTT TANK A vs LUMO

| RUN | ZERO  | SPAN  | P                | T | V <sub>CO2</sub> | SCOTT TANK A |       | CO <sub>2</sub> (U) | CO <sub>2</sub> (ppm) |
|-----|-------|-------|------------------|---|------------------|--------------|-------|---------------------|-----------------------|
|     |       |       |                  |   |                  | A            | I     |                     |                       |
| 1   | 0.000 | 0.783 | 15.96            |   | <del>1465</del>  |              |       |                     |                       |
| 2   |       |       |                  |   | 1465             |              |       |                     |                       |
| 3   | 0.000 | 784   | 16.40            |   | 1464             | 786          | 16.51 | 1396                | 345.98                |
| 4   | "     | "     | 16.75            |   | 1463             | ✓ 785        | 16.90 | 1400                | 348.36                |
| 5   | "     | 784   | <del>17.20</del> |   | <del>1464</del>  |              |       |                     |                       |
| 6   |       |       | 17.20            |   | 1461             | ✓ 785        | 17.35 | 1394                | 345.92                |
| 7   | 0.00  | 784   | 17.53            |   | 1460             | ✓ 785        | 17.68 | 1393                | 345.98                |

⊕ - Blank found

new AIR ~ 12:45 PM  
(~ 300 psi left in EXTRA TANK AT TOWER)

| RUN | ZERO | SPAN | P     | T | V <sub>CO2</sub> | SCOTT TANK A = 345.4 ppm |       | CO <sub>2</sub> (ppm) |
|-----|------|------|-------|---|------------------|--------------------------|-------|-----------------------|
|     |      |      |       |   |                  | Sample                   | T     |                       |
| 1   | 0    | 781  | 20.19 |   | 1381             | 780                      | 20.27 | 400.03                |
| 2   | "    | "    | 20.42 |   | 1380             | 780                      | 20.50 | 399.99                |
| 3   | 0    | 781  | 20.77 |   | 1379             | 780                      | 20.85 | 399.41                |
| 4   | 0    | 782  | 21.08 |   | 1378             | "                        | 21.17 | 399.52                |
| 5   | 0    | 782  | 21.49 |   | 1377             | 781                      | 21.55 | 399.94                |
| 6   | 0    | 782  | 21.84 |   | 1376             | 780                      | 21.90 | 400.04                |
| 7   |      |      |       |   |                  |                          |       |                       |

399.82 ± 0.28  
(100)

New Sealed solutions:  $0.7523g - 5.05g/L \times 0.500g$   
 $\frac{56ml}{56ml} = 10.085/L$

NEW BATCH OF SEALED TARGETS

using 5g/L solution // 1 ml each 5 mg in solution

1 → 9 ⇒ Kieselguhr silica-gel  
 10 → 16 ⇒ Whatman GF/C

TARGETS DIDNT LOOK TOO GOOD (very white)  
 even the kieselguhr

Maybe Drying too fast

101 → 109 : kieselguhr; 5g/L  
 110 → 116 : Whatman GF/C

where does dye go?  
 for 5 g/L ⇒ 1 ml ⇒ 5 mg/ml

TRY weighing some of THE next target before AFTER

| NEW BATCH - ALL Whatman GF/C |       | before |        | after  |      |
|------------------------------|-------|--------|--------|--------|------|
| Well                         | VIAL# |        |        |        | SOLN |
| 1                            | 117   | —      | —      | —      | DYE  |
| 2                            | 118   | —      | —      | —      | DYE  |
| 3                            | 119   | —      | —      | —      | DYE  |
| 4                            | 120   | 0.0084 | 0.0104 | 0.0084 | DYE  |
| 5                            | 121   | 0.0060 | 0.0170 | 0.0060 | DYE  |
| 6                            | 122   | 0.0036 | 0.0160 | 0.0036 | DYE  |
| 7                            | 123   | 0.0084 | 0.0082 | 0.0084 | DYE  |
| 8                            | 124   | 0.0055 | 0.0058 | 0.0055 | MECH |
| 9                            | 125   | 0.0063 | 0.0060 | 0.0063 | MECH |
| 10                           | 126   | 0.0063 | 0.0063 | 0.0063 | MECH |
| 11                           | 127   | 0.0064 | 0.0063 | 0.0064 | MECH |

8) ALSO TURNED N<sub>2</sub> flow DOWN (longer DRYING TIME)

DYE APPEARS TO DEFINITELY BE IN THE TARGETS - EVEN THOUGH yellow color is NOT real apparent. ALSO - weights were drifting some - MIGHT MAY EVAPORATE SOME DYE IN IT.



SHOULD REDO SOME CELLULOSE TARGETS IN THIS FASHION

1/4/00

Rechecking wind direction calculations

(\*) Not calculating mean wind direction properly!!  
(will be right most of time)

W/ Time series of wind directions ( $\frac{1}{2}$  hr)

(A) OLD WAY  $\Rightarrow$  TAKE MEAN (doesn't work near  $0^\circ$ )

(B) NEW WAY  $\Rightarrow$  get x & y components

$$U_x = \text{mean}(\sin(\theta))$$

$$U_y = \text{mean}(\cos(\theta))$$

$\theta \in$  WIND DIRECTION  
IN RADIANS  
(Not degrees!!)

$$\theta = \arctan\left(\frac{U_x}{U_y}\right)$$

$\theta =$  IN RADIANS

$\left(\frac{180}{\pi}\right) = \text{degrees}$

THEN get proper quadrant

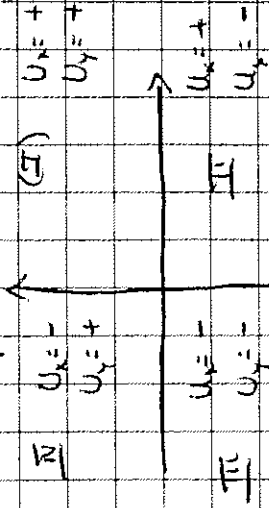

If  $U_y < 0 \Rightarrow \theta = \theta + 180$  (Quads. II & III)

$U_y > 0 \Rightarrow$  IF USE  $(\theta < 0, 360 + \theta)$

$\rightarrow$  Quad I

Vector Wind Speed =

$$U_e = \text{mean}(\text{wspeed} * \sin(\theta))$$

$$U_m = \text{mean}(\text{wspeed} * (\cos(\theta)))$$

$$U = \sqrt{U_e^2 + U_m^2}$$

$\rightarrow$  Quad IV

⇒ ALSO - New way of calculating std. deviation of wind direction  
see Campbell 23x MANUAL pp 11-2

1/11/01

03 DEC AT 11:00 AM (Back Down 10.147)  
TREC TO THE LAB

11:30 - New TILT ON CNA

OLD

NEW

$$\pm X = 0.097 \Rightarrow 1.019^\circ \quad \pm X = 0.099 \Rightarrow 1.035^\circ$$

$$\pm Y = 0.878 \Rightarrow 9.189^\circ \quad \pm Y = 1.200 \Rightarrow 12.65^\circ$$

New Cal std. on  $\bar{\sigma}$  1:30 PM

399.8 ppm

Downloaded Soil 23ra

11/22/01 Checking TEO O<sub>2</sub> CALIBRATION -

Running ZERO AIR

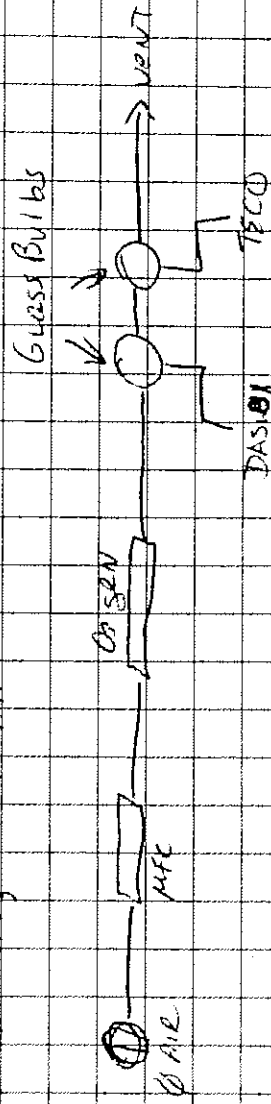

FLOW TOTA = 4.103 gpm

TEO = Bench Temp = 33.4°C

Pressure = 625.9 Torr

TEMP = 56.6°C

Flow A = 0.726 gpm

Flow B = 0.720 gpm

DAS/B1 Flow = 2.25(?)

(Cells A+B)

~~DAS/B1~~ O<sub>2</sub> setting

DAS/B1

TECO

off  
on

1.8 (-0.2-1.5)

92/93

91.5 - 96.3

~~76/75~~

73.2 - 71.6

103/102

109.1 - 107.7

112 = 103-114

121.3 - 120.9 - 123.5

47/48

46.7 - 48.1

30/31

24.5 - 25.6 - 26.1

SWITCHED INLET LINES AT UV detectors

~~32/33~~

~~24.5~~

32/33

24.5 - 23.8 - 25.4

45/46

41.5 - 43.0

68

62.2 - 63.9

94/95

88.1 - 89.5 - 90.4

114/115

110.2 - 112.0

131/132

129.5 - 128.1

SWITCHED INLET LINES -

~~128~~

X 118/119/120

126.5 - 121.8 (2)

120/121

121.8 - 122.0

✓

119 - 120

120.1 - 121.6

off

10 - 12

20.1 - 1.3

## TESTING INLET LINES &amp; FILTERS

Setup

DASIAL

TECO

Normal

92-93-94

~~88.9~~ 88.9-90.1

Last Filter inline

96

86.7-85.8

OLD FILTER (from summer)

92/93/95

87.5-85.6

Lower 1/2 of inlet

96

66.6-67.7

Upper 1/2 of inlet

~~92/93/95~~ 97/95

65.9-64.9-66.2

Upper 1/2 of inlet

97-97

58.8-57.4

(+ empty filter

CASE - now)

Empty filter case

93-92

89.2-86.7-85.4

Normal

93-94-95

91.1-92.9-94.3

92.8-94.3

Full inlet line -

98

49.87-48.3

 $P = 557.6 \text{ mthg}$  $F_g = 0.706 \text{ hr}, F_g = 0.701 \text{ hr}$ 

TURN DOWN 03

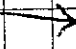

67-70

32.9-33.6-34.4

51-50

25.1-23.9

35-34

16.4-17.0

33-34

28.8-27.0

Normal

82

77.0-75.8

Sealed inlet

84-83-85

76.8-75.4-77.1

Rest of BIRCH

85

75.9-75.2-

TEACON

86

87-88

67.8-67.1-66.5

TEE #1 (piece of)

86

87-88

67.8-67.1-66.5

TEACON

86

87-88

67.8-67.1-66.5

TEE #2

86-89

63.7-62.4

Normal

84-88

80.3-78.1-78.5

85-87

82.8-83.8-84.1

EC inlet (Decabon)

88-89

85.1-85.9



1/24/01

Peaks w/ respect to towers  
Center clockwise from N

|   |                     | Miles           |
|---|---------------------|-----------------|
| 1 | -25° from mag. N    |                 |
| 2 | -44° " " "          |                 |
| 3 | -85° " " "          | S. Draper house |
| 4 | -94°                |                 |
| 5 | -104°               |                 |
| 6 | -140° - Deans Tower |                 |

### NEW DATA

12:08 MAN. SPAN + Q ON EC SYSTEM  
12:15-12:30 - Cleared R. by ground

~ 2:45 - Hooked up Blackens' data logger

=> underestimating Fox Tower

Channel 706

=> getting some data - but it is intermittent  
& looks crazy

Don't understand what's going on.

Turned this channel off after ~ 20 min

### THINGS TO CHECK -

① IS DATA BEING OUTPUT IN HIGH RESOLUTION

② IS THERE DATA LOGGET PROGRAM SET-UP

(MISSING SAMPLES, ETC. - WRITING OTHER DATA TO FS #1)

③ NEED TO CHECK IS MIN. COORDINATES.

④ TRY PUTTING IN PROGRAM ~~just~~ just spew out data!

sample

$$y_{BGR} = 0$$

|   |   |
|---|---|
| て | ち |
| り | っ |
| の | に |

五十二

$$(-1) = -1$$

204-0

|    |    |
|----|----|
| ①  | ②  |
| 11 | 11 |
| 11 | 11 |

|   |   |
|---|---|
| 十 | 十 |
| 二 | 二 |
| 一 | 一 |

22

22
