# Supplementary material for: The Niwot Ridge Subalpine Forest US-NR1 AmeriFlux site – Part 1: Data acquisition and site record-keeping
Source: Copernicus journal article supplement (doi:10.5194/gi-5-451-2016), 2016-09-29
Supplement: Supplementary file 3 [file gi-5-451-2016-supplement.zip]

Archive with 22 entries (22 files):
- README_USNR1_webphoto.pdf
- USNR1_aster_ndaq.zip
- README_USNR1_webcalendar.pdf
- USNR1_opto22.zip
- USNR1_prep.zip
- USNR1_webcalendar.zip
- README_USNR1_aster_ndaq.pdf
- README_USNR1_OPS_aster.pdf
- USNR1_turnipseed_logbook.zip
- USNR1_ati_duck_manual.pdf
- README_USNR1_turnipseed_logbook.pdf
- README_USNR1_prep.pdf
- USNR1_logbook.zip
- USNR1_webphoto.zip
- README_USNR1_logger_code.pdf
- README_USNR1_OPS_nidas.pdf
- README_USNR1_logbook.pdf
- USNR1_OPS_aster.zip
- USNR1_logger_code.zip
- gi-5-451-2016-supplement-title-page.pdf
- USNR1_OPS_nidas.zip
- README_USNR1_opto22.pdf
