# Supplementary material for: The Niwot Ridge Subalpine Forest US-NR1 AmeriFlux site – Part 1: Data acquisition and site record-keeping
Source: Copernicus journal article supplement (doi:10.5194/gi-5-451-2016), 2016-09-29
Supplement: Supplementary file 3 [file gi-5-451-2016-supplement.zip › gi-5-451-2016-supplement-title-page.pdf]

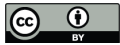

## *Supplement of*

# **The Niwot Ridge Subalpine Forest US-NR1 AmeriFlux site – Part 1: Data acquisition and site record-keeping**

**Sean P. Burns et al.**

*Correspondence to:* Sean P. Burns (sean@ucar.edu)

- gi-5-451-2016-supplement-title-page.pdf
- README\_USNR1\_OPS\_aster.pdf
- README\_USNR1\_OPS\_nidas.pdf
- README\_USNR1\_aster\_ndaq.pdf
- README\_USNR1\_logbook.pdf
- README\_USNR1\_logger\_code.pdf
- README\_USNR1\_opto22.pdf
- README\_USNR1\_prep.pdf
- README\_USNR1\_turnipseed\_logbook.pdf
- README\_USNR1\_webcalendar.pdf
- README\_USNR1\_webphoto.pdf
- USNR1\_OPS\_aster.zip
- USNR1\_OPS\_nidas.zip
- USNR1\_aster\_ndaq.zip
- USNR1\_ati\_duck\_manual.pdf
- USNR1\_logbook.zip
- USNR1\_logger\_code.zip
- USNR1\_opto22.zip
- USNR1\_prep.zip
- USNR1\_turnipseed\_logbook.zip

- USNR1\_webcalendar.zip
- USNR1\_webphoto.zip

The copyright of individual parts of the supplement might differ from the CC-BY 3.0 licence.
