# Supplementary material for: The Niwot Ridge Subalpine Forest US-NR1 AmeriFlux site – Part 1: Data acquisition and site record-keeping
Source: Copernicus journal article supplement (doi:10.5194/gi-5-451-2016), 2016-09-29
Supplement: Supplementary file 3 [file gi-5-451-2016-supplement.zip › README_USNR1_turnipseed_logbook.pdf]

# ***Supplemental File for “The Niwot Ridge Subalpine Forest US-NR1 AmeriFlux site – Part I: Data acquisition and site record-keeping”***

***by S. P. Burns et al.***

## **README for: USNR1\_turnipseed\_logbook.zip**

**S. P. Burns et al.**

sean@ucar.edu

Date: September 7, 2016

This is a README file for the zip archive of the hand-written logbooks created (primarily) by Andrew Turnipseed while the US-NR1 tower and data system was being setup as well as for the early years of tower operation (1999-2003).

The files included are:

```
-rw-r--r-- 1 sean mmm 12958225 Sep 6 09:52 andrew_turnipseed_logbook_1998_2000.pdf
-rw-r--r-- 1 sean mmm 14859069 Sep 6 12:46 andrew_turnipseed_logbook_2001_2003.pdf
-rw-r--r-- 1 sean mmm 4244359 Sep 7 12:50 andrew_turnipseed_logbook_duck.pdf
-rw-r--r-- 1 sean mmm 3721064 Sep 7 12:51 andrew_turnipseed_logbook_instruments.pdf
```

These pdf files include the following information:

andrew\_turnipseed\_logbook\_1998\_2000.pdf --> logbook notes from 1998-2000

andrew\_turnipseed\_logbook\_2001\_2003.pdf --> logbook notes from 2001-2003

andrew\_turnipseed\_logbook\_duck.pdf --> logbook notes about the data system

andrew\_turnipseed\_logbook\_instruments.pdf --> drawings and schematics of the data loggers and EC/LI-6262 and Profile system from site.

In addition, have included four documentation files that were part of the data released in January, 2003. These files are:

```
-rw-r--r-- 1 sean mmm 61490 Jan 2 2003 andrew_turnipseed_Climate.pdf
-rw-r--r-- 1 sean mmm 55925 Jan 2 2003 andrew_turnipseed_Fluxes.pdf
-rw-r--r-- 1 sean mmm 9681 Jan 2 2003 andrew_turnipseed_Readme1st.pdf
-rw-r--r-- 1 sean mmm 45270 May 5 2000 andrew_turnipseed_Sensors.pdf
```
