# Supplementary material for: The Niwot Ridge Subalpine Forest US-NR1 AmeriFlux site – Part 1: Data acquisition and site record-keeping
Source: Copernicus journal article supplement (doi:10.5194/gi-5-451-2016), 2016-09-29
Supplement: Supplementary file 7 [file gi-5-451-2016-supplement.zip]

# COMPUTATION BOOK

NAME

*Andrew Turnipseed*

*Book 3*

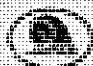

AMPAD, Dallas, TX. 75202

12-156

1/31/01 Retesting inlet line THAT I cleaned for C<sub>3</sub>

| <u>CONDITION</u>    | <u>DASIBI</u> | <u>TECO</u> (use for test) |
|---------------------|---------------|----------------------------|
| NO inlet            | 124-125       | 126.7 - 124.2              |
| Filter + inlet line | 127           | 65 → 10:18                 |
|                     |               | 78 10:21                   |
|                     | 128 ———       | 86.2 10:44                 |
|                     | 131 ———       | 92.3 11:21                 |
|                     |               | 95.9 12:50                 |
| Filter alone        | 133           | 133-131 ✓                  |

↳ looks like it's not getting any better  
 Filter looks O.K.

My first way of cleaning

- FLUSHED w/ Acetone
- THEN MeOH
- THEN High purity H<sub>2</sub>O
- THEN UHP N<sub>2</sub> flowed overnight

AFTER ABOVE -

- FLUSHED w/ HNC<sub>3</sub> solution
- THEN HIGH PURITY H<sub>2</sub>O
- THEN UHP N<sub>2</sub>

2/1/01 TESTING TUBING AGAIN

| <u>CONDITION</u> | <u>DASIBI</u> | <u>TECO</u>                |
|------------------|---------------|----------------------------|
| FILTER ONLY      | 133           | 126.8 - 127.4              |
| INLET line       | 133           | 83.1 10:36                 |
|                  | 113           | 81. 11:12                  |
|                  | 122           | 82 1:20 ⇒ STILL NOT CLEAN? |

TEST 3/8" TUBING

SMALL PIECE w/

SS FITTINGS

Put in LONG 3/8" PIECE

121

107.6 - 108.4

120

101.9 - 100.9 (losing 6-7 ppb)

123

98.8

↓ summary went down (?)

| Condition         | DASIB1 | TECO                 |
|-------------------|--------|----------------------|
| TEFLON H3<br>25ft | 119    | 102.9 - 103.3        |
| TAKE CLE          | 118    | 108.1                |
| FE. #4            | 119    | 106.9<br>85.3 - 86.3 |

NOT  
BAD

2/6/01 New program in Fast23r logger  
using Fast23r4.csi

outputs: u, v, w, te, diag, oz stat, co2 ec, tec, pec, h2o.ec, h2o.kr,  
ec.ftot, analog-8, co2.obs, h2o.obs, ~~pressure~~,  
co2anal, h2oanal

Last 5 ARE 50M from Li-7500

put program in around 11:00 AM

Restarted DUCK AT 12:42

w/ changes to prep-config (covar. config?)  
yes-added  
pressure

New Dessicant in profiler - 11:45 - 11:57 AM

New CO2 standard

CSTAND = 345.7 ppm

| RUN | SPAN  |       |     |        | sample |     |      | [CO2] ppm |
|-----|-------|-------|-----|--------|--------|-----|------|-----------|
|     | ZERO  | T     | P   | Vcor   | T      | P   | Vcor |           |
| 1   | 6.000 | 20.73 | 722 | 1364   | 20.36  | 720 | 1519 | 399.73    |
| 2   | 6.000 | 20.52 | 720 | 1363 ✓ | 20.56  | 719 | 1518 | 399.76    |
| 3   | 0.000 | 20.89 | 719 | 1361   | 21.00  | "   | 1518 | 400.48    |
| 4   | "     | 21.24 | "   | 1360   | 21.41  | 719 | 1512 | 398.77    |
| 5   | "     | 21.71 | 718 | 1358   | 21.81  | 718 | 1514 | 400.64    |
| 6   | "     | 22.14 | 718 | 1357   | 22.24  | 718 | 1512 | 400.01    |

399.82  
0.58 ppm

NEW CAL TANK ON AT 2:15 PM

2/9/00 Testing some more TUBING $F_{\text{TOT}} = 3 \text{ SLPM}$ 

1:15

| <u>CONDITION</u> | <u>DAS1/1</u>                            | <u>TECG</u>                     |
|------------------|------------------------------------------|---------------------------------|
| Nothing (filter) | 82-83                                    | 86.6 <sup>7</sup> - 79.6 - 82.5 |
| TEFLON #5        | 87-88-89<br>→ 90<br>LAMP not stable, but | 67.1 - 68.9<br>69.8             |
| TEFLON #6        | 97-98                                    | 91.4 - 94.3 - 95.4 - 96.8 ✓     |
| TEFLON #7        | 101-100                                  | 97.2 - 95.4 - 98.3 ✓            |
| TEFLON #8        | 110-111                                  | 79.8 - 78.4                     |
| TEFLON #10       | 115-119                                  | 96.7 - 98.0                     |
| Nothing          | 120                                      | 115.2 - 114.3                   |
| TEFLON #9        | 121                                      | 103.0 - 104.3 - 101.9           |

JOHN BIRKS H<sub>2</sub>O test // O<sub>3</sub> off

|                                                    |                                             |                                                                    |
|----------------------------------------------------|---------------------------------------------|--------------------------------------------------------------------|
| NO H <sub>2</sub> O                                | 11-12                                       | 1.0-2.2                                                            |
| TURN H <sub>2</sub> O ON                           | 41 (goes up??)<br>↓ BACK DOWN<br>TO 15 → 12 | goes down to -140<br>THEN starts coming back<br>↓<br>-44.3 → -35.5 |
| TURNED O <sub>3</sub> ON<br>let it RUN for a while | up to 108                                   | was originally -100 or so<br>creeps back to 46<br>(2:38)           |
| 3:21                                               | 126-127                                     | 93.4-92.8                                                          |
| O <sub>3</sub> off ⇒                               | 9-10                                        | -9.8 →                                                             |



~~1-10 on, O<sub>3</sub> off~~

| CONDITION       | DATA 1              | TECO                                    | Intensity A | Intensity B |
|-----------------|---------------------|-----------------------------------------|-------------|-------------|
| 200, $\phi$ AIR | 9-11                | -9.97-9.8                               | 0.90387     | 0.88612     |
| 120 off         | 10<br>4) pulse (22) | P16 4) pulse (27)<br>B16 4) pulse (-81) |             |             |

2/19

New  $\phi$  AIR (CO<sub>2</sub> std AT 760 ps.)

New RADIMETER TILT -  $\pm y = 0.000$  (BACK TO LEVEL)  
 $\pm x = 0.114$

AT 12:42 PM

(OLD READING  $\pm y \sim 1.2$  V  $\rightarrow$  LOTS OF FLUCTUATIONS  
 $\pm x = 0.104$ )

EC CO<sub>2</sub> OFF AT 12:45  $\Rightarrow$  CHANGE PUMP VEINS  
RUNNING AGAIN AT 2:00  
RUNNING AT 9 slpm, 48 kPa

Thermocouples for handheld Omega  
1 - 87 cm  
2 - 95 cm  
3 - 95 cm

3/2/01 Screw-up on Gold files to correct later.

At times  $F(\text{CO}_2)$  &  $F(\text{CO}_2)_{\text{filtered}}$  are not same value.

(see Oct. 1999 as example)  $\rightarrow$  175 pts (12%)

Even after throwing out all possible substitution options  
(gap-filling)

$\rightarrow$  Such low  $\mu^*$ , E-Balance, MicroNet violations.

What seems to be happening is:

$\left\{ \begin{array}{l} F(\text{CO}_2) \text{ is getting values from } F(\text{CO}_2) \text{ measured by IRGA using IRGA Webb conn.} \\ F(\text{CO}_2)_{\text{filtered}} \text{ is getting values from } F(\text{CO}_2) \text{ using KN Webb conn.} \end{array} \right.$

$\rightarrow$  probably only important in winter when IRGA underestimates LE due to freezing in lines.

Must be happening in gap-filling somewhere??

Don't know where

$\Rightarrow$  Also probably more noticeable in 99  $\Rightarrow$  w/ our gap-filling

June 2000  $\Rightarrow$  looks perfectly fine!!

3/7/01  $\Rightarrow$  went to site = nothing needed

3/9/01 Cleaned TEECOW #1 with:

- ① 4 volumes of pentane
- ② 2 volumes HPLC MeOH
- ③ Dried w/ UHP  $\text{N}_2$

3/19/01 - Downloaded SOIL DATA logger

TRAVIS DOWNLOADED 23x on South Tower (HAS ENTIRE WINTER) CO<sub>2</sub> STD = 345.7

| New Cal Mixture SPAN |       |       |     |      | SAMPLE |     |      | [CO <sub>2</sub> ] ppm |
|----------------------|-------|-------|-----|------|--------|-----|------|------------------------|
| RUN                  | ZERO  | T     | P   | V    | T      | P   | V    |                        |
| 1                    | 0.00  | 21.68 | 788 | 1379 | 21.8   | 788 | 1536 | 399.77                 |
| 2                    | "     | 22.20 | 788 | 1377 | 22.27  | 788 | 1535 | 400.30                 |
| 3                    | 0.003 | 22.59 | 788 | 1376 | 22.24  | 787 | 1535 | 400.80                 |

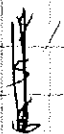

New p AIR

New CO<sub>2</sub> STD. (2:30)

New Dessicant (2:30)

SOIL SAMPLES\* TRAVIS took some from Middle Tower - Treatment  
South Tower - NO Treatment

Treatment ⇒ Soil looked like fudge cake

Non-treatment ⇒ Soil looked like cold soil

4/12/01 - CNR logger off 10:38 → 11:49 DOWNLOADING

- New EC FILTER 11:09 - 11:28 AM

- Cleaned Kr hyg. 11:30 - 12:00 (H<sub>2</sub>O was freezing on windows may not be much enhancement)

4/13/01 Testing #1 Tel. for O<sub>2</sub> again (after pentane/NaOH wash)

| Condition                            | Disbi. | TEL                              |
|--------------------------------------|--------|----------------------------------|
| - NOTHING -                          | 108    | 88.6 - 89.9 - 91.9               |
| PLT IN Tel #1                        | 116    | 35 → 29.6 → 27.7                 |
| TURN F <sub>1</sub> DOWN TO crank up |        | [O <sub>2</sub> ]                |
| "                                    | 177    | 38 (2:47)                        |
|                                      | 190    | 78 (2:55)                        |
|                                      | 223    | 112 9.09                         |
| crank up F <sub>1</sub> = 305 slpm   |        |                                  |
|                                      | 132    | 92.8 - 91.7 - 93.9 - 96.5 - 91.2 |
|                                      |        | 90.8 - 91.6                      |
| TAKE out Tel #1                      |        |                                  |
|                                      | 123    | 131.7 - 130 - 129.9              |
| ZERO                                 | 10     | still losing ~ 40ppb             |

4/16 Soil Samples

#5, #10 Irrigation, N tower

#6, ~~#8~~ #3 BY MAIN TOWER

#13, #4 - Ref. snow pit

New Cal. Standard

$C_{\text{std}} = 345.7 \text{ ppm}$

SPAN

Sample

| Run | $\phi$ | P   | T     | V    | P   | T     | V    | $\overline{CO_2}$ |
|-----|--------|-----|-------|------|-----|-------|------|-------------------|
| 1   | 0      | 809 | 21.28 | 1376 | 805 | 24.41 | 1531 | 402.07            |
| 2   | 0      | 808 | 24.28 | 1323 | 805 | 25.15 | 1531 | 400.54            |
| 3   | 0      | 804 | 25.75 | 1370 | 805 | 25.95 | 1526 | 400.59            |
| 4   | 0      | 804 | 26.4  | 1368 | 805 | 26.55 | 1525 | 400.28            |
| 5   | 0      | 809 | 26.86 | 1367 | 805 | 26.96 | 1531 | 402.97            |

401.3 ppm

TREE

SOIL SAMPLES

10 cm

50 cm

125

100 cm

100

150 cm

- 90 cm - From other tree

200 cm

110



4/20/01 looks like Probe <sup>SW</sup> on Tower leg  
 Need to TALK TO Jack Fox

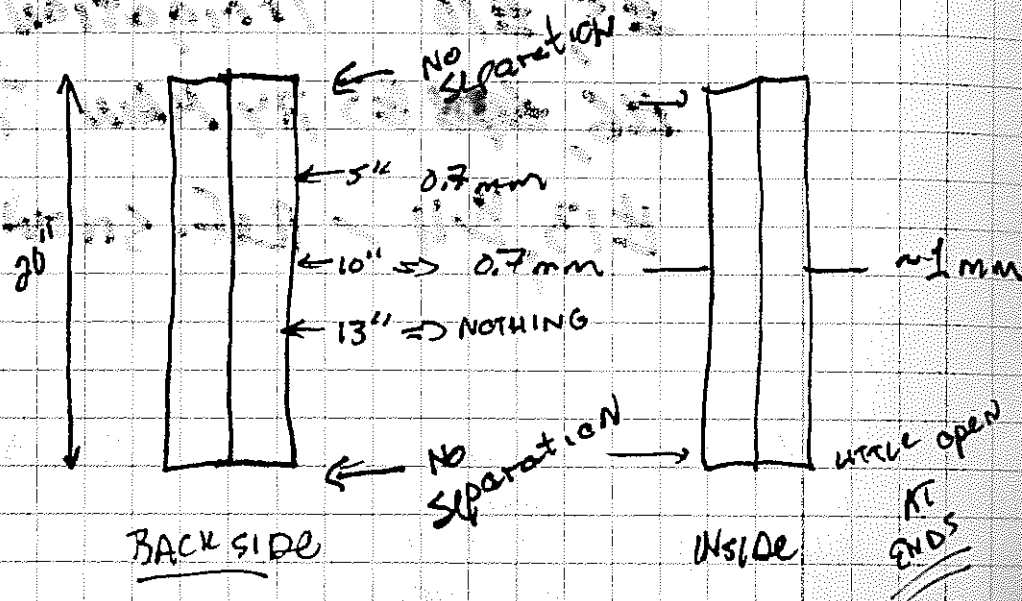

4/18/01 Trans switched out  
 cal tank AT 3:00 PM

4/23/01 => Power out => tripped breaker AT ~11:00 AM

4/26/01 => switched out Blanken DATA logger 12:50-1:30

5/7/01 Downloaded ~~Blanken~~ Soil DATA logger - looks OK

10:45-11:00

~~11:45-12:00~~ Downloaded MET30 logger  
 - changed dessicant in profiler

11:- 11:30 Downloaded prof data logger

3:30 TEE #3 RUNNING AGAIN  
 used black TE, TEE #3 & TEE #6  
 AS INLET LINE

5/11/00 New  $\phi$  AIR

Prof12-2.CSI

Double ProfilerEvery 238 min  $\Rightarrow$  Sub.13 Levels

| Level | C1 - C4         | Status |
|-------|-----------------|--------|
| 1     | 1000            | -8000  |
| 2     | <del>1100</del> | -7000  |
| 3     | 1010            | -6000  |
| 4     | 1110            | -5000  |
| 5     | 1001            | -4000  |
| 6     | 1101            | -3000  |
| 7     | 0000            | -2000  |
| 8     | 0100            | -1000  |
| 9     | 0010            | 0      |
| 10    | 0110            | 1000   |
| 11    | 0001            | 2000   |
| 12    | 0101            | 3000   |
| 13    | 1011            | 4000   |
| 14    | 0011            | 5000   |

CAN USE: 

|      |
|------|
| 1111 |
| 0111 |

 ✓AS control port codes  
for 2 more lines

- ATI OFF AT 12:30 (Need Repair)
- CHANGED PROFILER FILTERS  $\Rightarrow$  12:30-1:45 PM

5/14/01 (In Lab) HANDAR Test Cable

- PIN 3 - GROUND (0V)  
 11 - +12V  
 12 - REF VOLT (FOR DIRECTION)  
 13 - DIRECTION SIGNAL  
 14 - FREQ. SIGNAL (N/A)  
 15 - SPEED SIGNAL

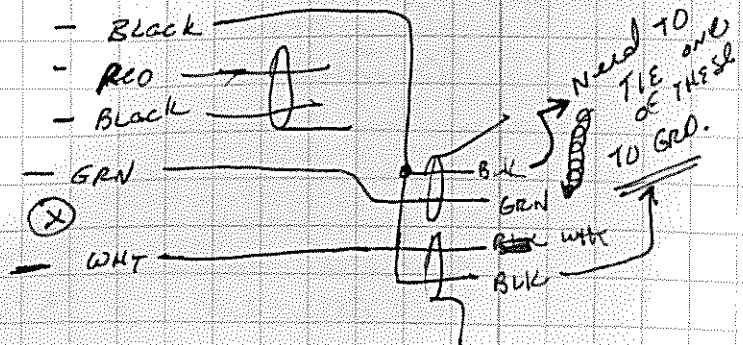

5/16/01 empties Brought down ✓

UHP N<sub>2</sub>: T641151  
22696657  
1596583  
TD-001290  
φAIR = 34-5119

"  
1  
+

Hern's pumps: Pumps DRAW 0.5-0.6 kW/pump  
4 pumps (I THINK) =

Normally

Extra = < 1A ⇒ ~0 W = P  
Top - 1A ⇒ 120 W (0.12 kW) P = VI  
Mid. - 2.5A ⇒ 300 W (0.3 kW)  
Bottom - 5A ⇒ 600 W (0.6 kW)

Hern = TOTAL = 2.4 kW  
(70%)

TOTAL = 3.42

5/23 New cal. Standard

C<sub>SPAN</sub> 345.7 ppm

| Run | ZERO | SPAN  |     |      | Sample  |     |      | [CO <sub>2</sub> ] ppm |
|-----|------|-------|-----|------|---------|-----|------|------------------------|
|     |      | T     | P   | V    | T       | P   | V    |                        |
| 1   | 0    | 29.63 | 793 | 1355 | 29.68   | 793 | 1518 | 402.55                 |
| 2   | 0    | 29.34 | 794 | 1354 | 29.39   | 792 | 1521 | 404.16                 |
| 3   | 0    | 29.56 | 792 | 1353 | 29.58   | 792 | 1530 | 404.16                 |
| 4   | 0    | 29.73 | 793 | 1352 | 29.76   | 792 | 1528 | 407.15                 |
| 5   | 0    | 29.84 | 793 | 1352 |         |     |      |                        |
| 6   | 0    | 29.90 | 792 | 1352 | 29.96   | 792 | 1522 | 405.3                  |
| 7   | 0    | 30.10 | 792 | 1351 | 29.30.2 | 791 | 1527 | 407.5                  |

CO<sub>2</sub> inlet is 1 1/2 + 1 inch from path

406.9  
± 1.1 ppm

New std on = 3:00 PM

New Dessicant = 3:00 PM

Double profiler

For calibration

- Level 14

- level 15

WAS

| Level | Relay      |
|-------|------------|
| 1     | T-0        |
| 2     | T-1        |
| 3     | T-2        |
| 4     | T-3        |
| 5     | T-4        |
| 6     | T-5        |
| 7     | T-6        |
| 8     | T-7        |
| 9     | B-0        |
| 10    | B-1        |
| 11    | B-2        |
| 12    | B-3        |
| 13    |            |
| 14    | B-4, 5 & 7 |
| 15    | B-4, 6 & 7 |

Relays  
4, 5 & 7 on BOTTOM - ON

4, 6 &amp; 7 on BOTTOM - ON

[Level 13(?)]

C4-C1

| Level | Relay | C4-C1 |
|-------|-------|-------|
| 1     | T-0   | 1000  |
| 2     | T-1   | 1100  |
| 3     | T-2   | 1010  |
| 4     | T-3   | 1110  |
| 5     | T-4   | 1001  |
| 6     | T-5   | 1101  |
| 7     | T-6   | 0000  |
| 8     | T-7   | 0100  |
| 9     | B-0   | 0010  |
| 10    | B-1   | 0110  |
| 11    | B-2   | 0001  |
| 12    | B-3   | 0101  |
| 13    | B-4   | 1011  |
| 14    | B-5   | 0011  |
| 15    | B-6   | 1111  |
| 16    | B-7   | 0111  |

No LEVEL 13

4, 5, 6 &amp; 7

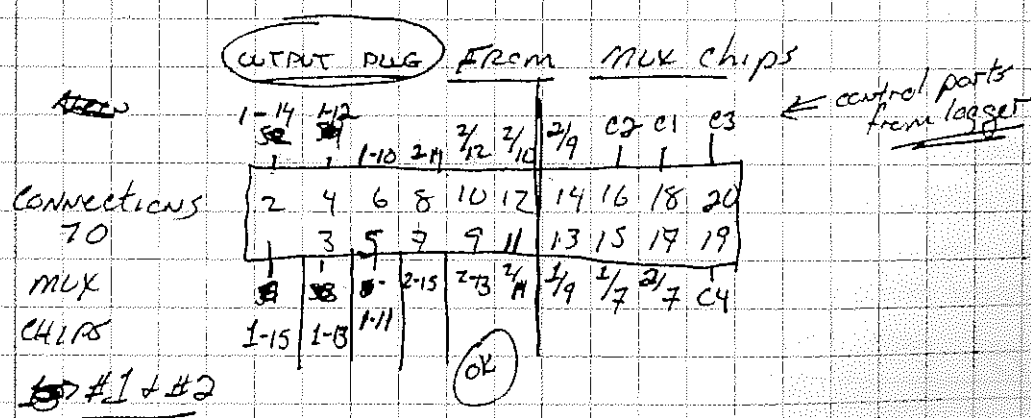

Designated (mux# - PIN#)



| Output plug → | Relay BOARD   | CARD EDGE CONN |              |
|---------------|---------------|----------------|--------------|
| Output plug   | card (T or B) | PIN (B-#)      | PIN 25 → +5V |
|               | T             | B-2            |              |
| 2             | T             | B-3            |              |
| 3             | T             | B-4            |              |
| 4             | T             | B-5            |              |
| 5             | T             | B-6            |              |
| 6             | T             | B-7            |              |
| 7             | T             | B-8            |              |
| 8             | T             | B-9            |              |
| 9             | B             | B-2            |              |
| 10            | B             | B3             |              |
| 11            | B             | B4             |              |
| 12            | B             | B5             |              |
| 13            | B             | B6             |              |
| 14            | B             | B7             |              |
| 15            | B             | B8             |              |
| 16            | N/C           | —              |              |
| 17            | B             | B9             |              |
| 18            | N/C           | —              |              |
| 19            | N/C           | —              |              |
| 20            | N/C           | —              |              |

Relays & Logger program seem to be working!!

After calibration - Resets to Level I (no matter where it is)

Some measurements

CO<sub>2</sub> inlet → 30 cm  
 Ke Pys → 45 cm

DOUBLE PROFILER BACK ON AT 2:53 PM  
 RUNNING 12 LEVELS

For Rebs ventilator - 1/2" o.d. x 2' (24")

5/31/01 ATI BACK-UP

(\*) (\*) TURNED OFF Li7500  $\Rightarrow$  THIS INADVERTANTLY SCREWS UP THE CSAT SONIC SDM  $\Rightarrow$  NO DATA FROM  $\approx$  1:00 - 3:30 PM

$\Rightarrow$  KR Ltg. OFF 1-1:30  $\Rightarrow$  cleaned optic  
 VN 0.55V  $\Rightarrow$  STILL OK BUT FAADING FAST  
 WILL PROBABLY TAKE DOWN & SEND BACK  
 TO CAMPBELL SCEN

$\Rightarrow$  ATI BACK ON AT 21.5m AT 3:00 PM

$\Rightarrow$  Li7500 reading junk (SITTING ON TOWER)

(\*) NOTE 3-3:30 PERIODICALLY CLOUDY  
 SEE 2 DISTINCT LIGHT LEVELS  $\Rightarrow$  WAY TO  
 LOOK AT DIFFUSE LIGHT!!

6/1/01

10:30-10:50 ~~PAR-HAZE~~ DISCONNECTED Li7500 SDM  $\Rightarrow$  MAY HAVE  
 LOST SONIC DATA

11-11:30 RECALIBRATED Li7500

$Z_{CO2} = 0.85$  (WAS 0.84)

$Z_{H2O} = 1.08$  (WAS 1.08)

$S_{CO2} = 1.01$  (WAS 1.01)

11:45-11:50 = DOWNLOADED CNR DATA LOGGER

1  $\Rightarrow$  1:30 DOWNLOADED Prof & Met LOGGERS ON TOWER

1:30-2:00 MOVED Li7500  $\Rightarrow$  AT 2:00  $\Rightarrow$  RUNNING AGAIN (\*)

NEXT TO ATI SONIC AT 21.5m

2:10  $\Rightarrow$  MAN ZERO & SPAN OF Eddy SYSTEM

NOTE  $\Rightarrow$  ASPEN <sup>leafing</sup> ~~butting~~ out!!

$\Downarrow$   
 MAY HAVE  
 LOST  
 CSAT  
 DATA

Some conversion TO remember

Latent heat of fusion -  $L_f = 3.34 \times 10^5 \text{ J/kg}$   
for  $\text{H}_2\text{O}$

Carbon Sums

~~NEE~~  $\left( \text{NEE} \frac{\mu\text{mol}}{\text{m}^2 \text{ s}} \right)$

DAILY sum =  $\sum_{t=1}^{1800} \text{NEE} \left( \frac{\mu\text{mol}}{\text{m}^2 \text{ s}} \right)$

$$\left( \frac{\mu\text{mol CO}_2}{\text{m}^2 \text{ day}} \right) \left( \frac{1 \text{ mol CO}_2}{10^6 \mu\text{mol CO}_2} \right) \left( \frac{12 \text{ g}}{1 \text{ mole C}} \right) = \frac{\text{gC}}{(1.2 \times 10^{-5})} \text{ m}^2$$

CO<sub>2</sub> Flux

$$\left( \frac{\text{mg}}{\text{m}^2 \text{ s}} \right) \left( \frac{1 \text{ mmol CO}_2}{44 \text{ mg CO}_2} \right) \frac{10^3 \mu\text{mol CO}_2}{1 \text{ mmol CO}_2} = 22.7273 \frac{\mu\text{mol}}{\text{m}^2 \text{ s}}$$

specific humidity:  $q = \frac{P_v(\text{H}_2\text{O})}{P_a(d-y \text{ air})}$  ↖ densitier

Gas Constant:

$$8.3145 \frac{\text{Pa m}^3}{\text{K mol}}$$

For  $\text{H}_2\text{O}$ :  $R_v = 0.4619 \frac{\text{Pa m}^3}{\text{K g}(\text{H}_2\text{O})}$  (or  $\frac{\text{kPa m}^3}{\text{K kg}(\text{H}_2\text{O})}$ )

For air:  $R_a = 0.287 \frac{\text{Pa m}^3}{\text{K g}(\text{air})}$  (or  $\frac{\text{kPa m}^3}{\text{K kg}(\text{air})}$ )

H<sub>2</sub>O Flux  $\frac{\text{mmol}}{\text{m}^2 \text{ s}} \Rightarrow \text{mm/time}$

$$\left( \frac{\text{mmol}}{\text{m}^2 \text{ s}} \right) \left( \frac{18 \text{ mg}}{\text{mmol}} \right) \left( \frac{1 \text{ g}}{1000 \text{ mg}} \right) \left( \frac{1 \text{ cm}^3}{1 \text{ g}} \right) \left( \frac{1 \text{ m}^3}{10^6 \text{ cm}^3} \right) \left( \frac{1000 \text{ mm}}{1 \text{ m}} \right) = \frac{\text{mm}}{\text{s}}$$

$\frac{1}{\rho}$  density of liq.  
 $\text{H}_2\text{O}$

DO cumulative sum to get daily/yearly, etc.

Error in Webb connection

$$LE = L_v (1 + \mu_w) w' q' \quad \mu = 1.6077$$

$$\sigma = \frac{p_v}{p_a} \left( \frac{H_2O}{air} \right)$$

Worst case SCENARIO AT OUR SITE

$$T = 25^\circ C \quad RH = 100\% \quad P = 71 \text{ kPa}$$

$$e_{sat} = 3.32 \text{ kPa} = e$$

$$p_v = 24.15 \text{ g m}^{-3} \quad \rho = 830.2 \text{ g m}^{-3} \quad p_a = 806 \text{ g m}^{-3}$$

$$\mu_w = 0.045 \text{ (5\%)}$$

6/26/01 New Cal. Standard

Cspan = 345.7 ppm

| RUN | ZERO | span  |     | ✓    | sample |     |      | CO <sub>2</sub> (ppm) |
|-----|------|-------|-----|------|--------|-----|------|-----------------------|
|     |      | T     | P   |      | T      | P   | ✓    |                       |
| 1   | 0    | 33.23 | 812 | 1346 | 33.3   | 812 | 1522 | 407.36                |
| 2   | 0    | 33.66 | 812 | 1345 | 33.78  | 812 | 1521 | 407.66                |
| 3   | 0    | 33.97 | 812 | 1344 | 34.1   | 812 | 1518 | 406.98                |
| 4   |      |       |     |      |        |     |      |                       |
|     |      |       |     |      |        |     |      | 407.3 ± 0.3 ppm       |

ON AT 12:15 PM

6/27/01 - 1st off (to be sent back) ~ 10:00 AM

- put jumper between low & gnd on propuane  
wind speed read-outs (~10:00)seems to be working on 16m propuane - no effect  
on 26m vane- Rearranging plugs => moved met & profile loggers to  
EXTRA outlet at bottom (which RARELY pops)  
(NO DATA LOSS)

- Plugged TECO into BOTTOM

→ Plugged IRGA's into top circuit (~3:30)  
IRGA's off for ABOUT 30 min? 3-3:30

THIS frees up middle circuits for PIR-MS



### Notes on DOUBLE profiles

Levels 12  $\rightarrow$  7 (our tower) are in reverse order

Level 12  $\rightarrow$  1m

Level 11  $\rightarrow$  2m

10  $\rightarrow$  4.5m

9 - (?) 11m

8 - ~~2m~~

7 - 26m

Debris Tower

6

5

4

3

2

1

3<sup>rd</sup> Tower

14 - 6.1m

13 - 6m

Order goes from TOP to BOTTOM ON EACH TOWER

7/2/01 New Power Supply, IN DUCK

DATA Down from 9  $\rightarrow$  9:30

Also lost some undercanopy wind data from  
11  $\rightarrow$  12:00

7/9/01

Tested ATI sonic (hooked up to laptop)

Running in factory default mode (not what I  
picked)

Resetting mode  $\Rightarrow$  (outputting spikes)  $\Rightarrow$  runs  
for a minute or 2  $\Rightarrow$  THEN gives lots of  
ERRORS  $\Rightarrow$  finally gives  
bad checksum & quits

IF it comes back - it comes back in  
factory default mode

7/10/01 = New boom ON Li7500 (~11:00 AM)

Took ATI down (had screwed up again - even in just terse mode)

↳ BACK AT TRAILER → appeared dead.

Switch battery in Fast 23x logger

Fast data down from 11:30 - 12:30

Peter hooked up shadow band ~12:00  
but doesn't seem to be working

New standard ASG std ( $\frac{1}{2}$ -cyl.)

Span = 345.7 ppm

| Run | ZERO | span<br>T | P   | V    | sample<br>T | P   | V    | [CO <sub>2</sub> ] |
|-----|------|-----------|-----|------|-------------|-----|------|--------------------|
| 1   | 0    | 28.28     | 812 | 1363 | 28.34       | 812 | 1576 | 420.26             |
| 2   | 0    | 28.40     | 812 | 1362 | 28.42       | 812 | 1577 | 420.73             |
| 3   | 0    | 28.45     | 814 | 1363 | 28.47       | 814 | 1577 | 420.56             |
| 4   | 0    | 28.52     | 814 | 1363 | 28.53       | 814 | 1578 | 421.00             |
| 5   |      |           |     |      |             |     |      |                    |

420.7 ± 0.2 ppm

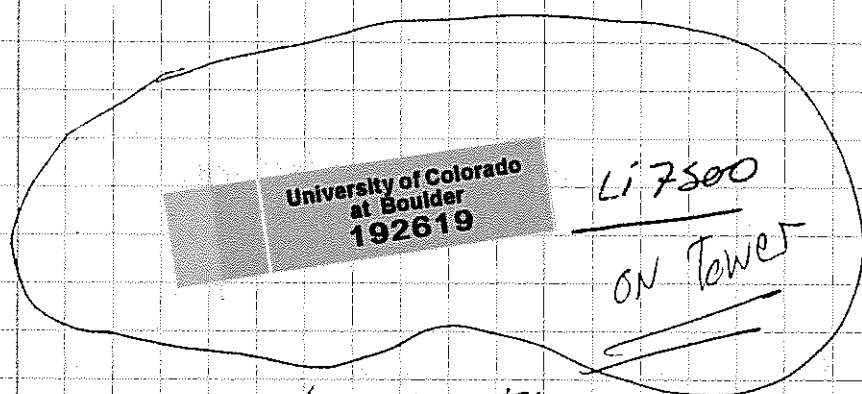

up ON 7/16, 17 & 18, 19

7/23 (F) BRIAN took plugged SF<sub>6</sub> line into EC line  
Flow RATE went up to 9.18 slpm (from ~8.5 slpm)  
Need to Re-calculate Lag Times

(2) ATI on AT ~11:30 AM

(3) New EC FILTER - 11:10-11:20 AM

charged prep. config & covar. config  $\Rightarrow$  just NAMES of channels  
 THINGS we USING fast O<sub>3</sub> Becomes fast SF<sub>6</sub> !!

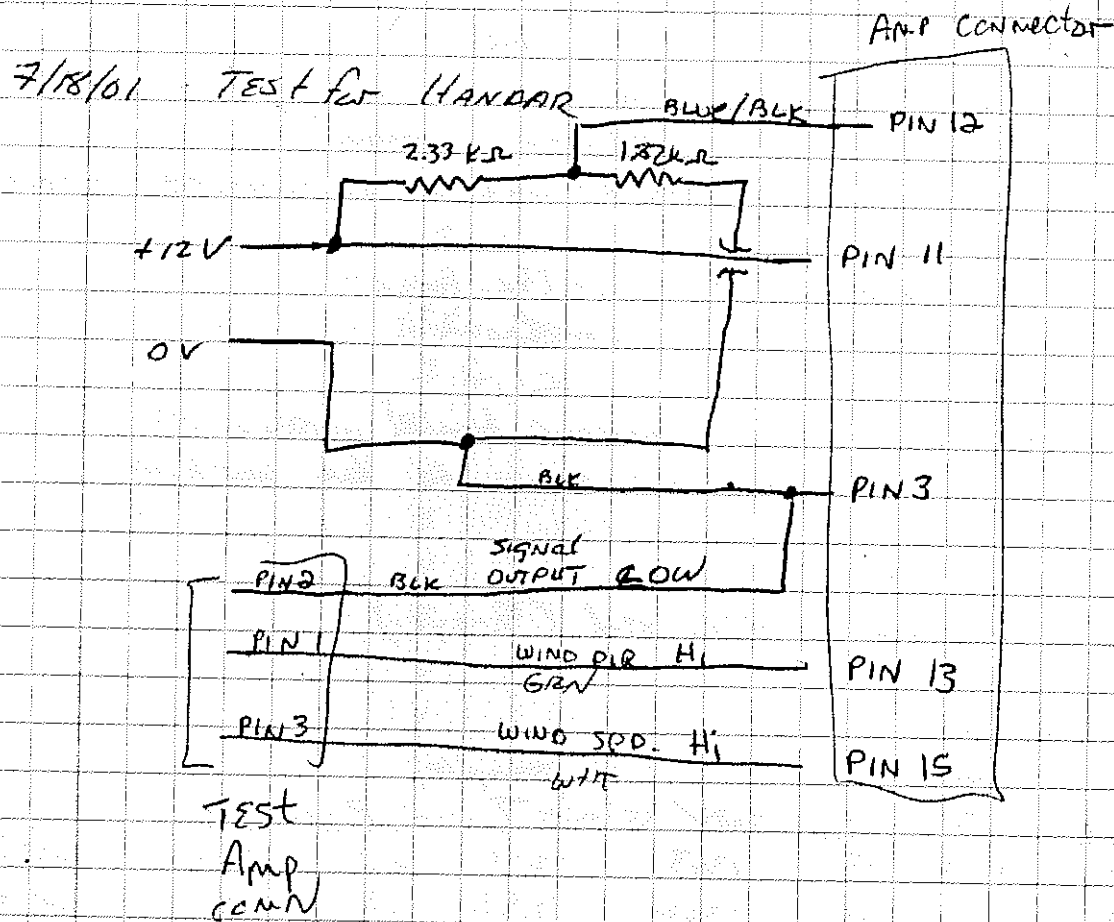

$$\begin{aligned} 11 \rightarrow 3 &\Rightarrow 12V \\ 12 \rightarrow 3 &\Rightarrow 1.08V \end{aligned}$$

THIS APPEARS TO BE WORKING for both wind speed & direction

7/23 Added HANDAR channel to met23x (program = met30C.csi)  
~~And~~  $\hookrightarrow$  Not put into data logger yet

7/24 HANDAR RUNNING AT 6.5 m  $\Rightarrow$  connected TO UNDERCANY  
 23x (see Instrument book for wiring)  
 $\hookrightarrow$  2:00 PM  
 Appears to be working but winds are very light & variable so it is hard to say for sure  
 (ALSO started RAINING)

Noreon scaling wind direction  $0 \rightarrow 5V = 0 \rightarrow 360^\circ$   
 with  $0^\circ$  Being magnetic North  
 wind speed  $0 \rightarrow 1V = 0 \rightarrow 125 \text{ mph}$

PAR Diode use  
241-1  
multiplier

7/25/01 12:00 New CO<sub>2</sub> std. 420.7ppm

7/27/01 met logger off 9:30-10:30 for REWIRING  
Downloaded met logger 2:30PM  
New program w/ HANDAR INCLUDED  
logging data from HANDAR AT ~3:00PM (to run)

- (\*) Note Autocal's off on EC system (w/ new program)  
Plug in next time I'm here
- (\*) Handar oriented to magN. North
- (\*) Check covars data from campus  $\Rightarrow$  IS IT WORKING?
- (\*) SHADOW band PAR sensor IS IN FULL SUNLIGHT

8/2/01 - Autocal's for EC BACK ON ~ 11:30 AM  
- Downloaded 23xx  $\Rightarrow$  Bate + Robt T<sub>c</sub> on South Tower  
54.71 net working !!  
- Put ~~old~~ Prof 14C-Csi back into  
DOUBLE profiler  $\Rightarrow$  W70 SF<sub>6</sub> channels !!  
~ 11:10 AM

8/6/01 10:30 AM  $\Rightarrow$  Profiler logger off;  
Downloaded logger // changed dissicant  
in profiler  
11:00-11:30  $\Rightarrow$  Kr Hyg. back on  
New FILTER on TECO

(\*) Lower breaker had popped; however under canopy  
wind sensors didn't come back on when power  
restored  
At 3:30  $\Rightarrow$  Running again. Battery pack had  
drained way down (~3.4V) + was taking time  
to charge up // Switch battery packs w/  
SOIL 23xa



8/7/01 Sealed Target # 20

10:20-10:40 Downloaded CNR logger  
Relevelled CNR-1

10:40-11:20 Switched Rebs Q\*7.1 // Replaced w/ Riet #2  
(2nd Rebs)!!  
Need to remember cal coeff.!!  
update

8/9/01 => Looking at July DATA => Precip gauge gave crazy value on July 28, 16100  
Big spike - Is it still working??  
↳ seems OK

8/10/01 Tried hooking up Sealed but when turned voltage on - signal  
messed out!?! Took Down + back to TRAILER

- THINKING ABOUT WINTER/spring exp.  
May shut down south + main tower exp + move THINGS to  
MIDDLE + North towers.

MIDDLE Tower

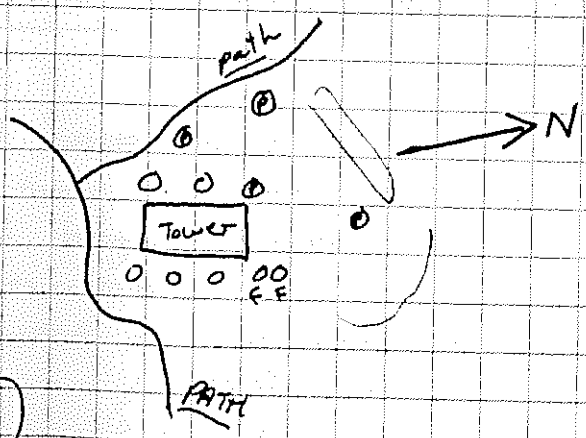

NORTH Tower

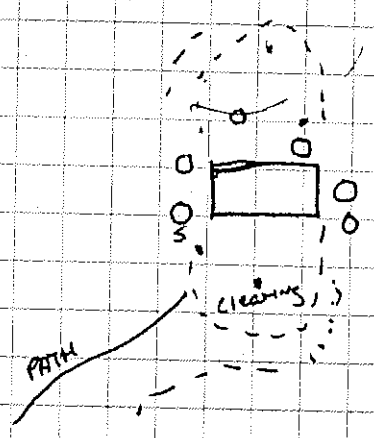

Totals

|                 |                    |                |                |
|-----------------|--------------------|----------------|----------------|
| TOTAL # of Tc's | 57 - Campbell's    | multiplexers:  | 10 AM416       |
|                 | 49 - Omega's       |                | 2 x 25T        |
| # of SMPs       | 8 - Campbell TDR's |                |                |
| PHOTOLOGUES:    | 81                 | DATA LOGGERS   | 2 x 23x        |
|                 |                    |                | 2 x 21x        |
|                 |                    |                | 1 x 10x        |
|                 |                    | other light => | 1 x Q*7.1 Riet |

#Tc's Already on Mid. Tower

30 - Campbell's (where do they all go?)

13 - Omegas

#Tc Already on North Tower

12 Campbell's

12 Omegas

10 of these go to south Tower

- ① Bring 3 Denometers From S-Tower to Mid. Tower  
2 Denometers From Main Tower to North Tower (if cables reach)

Extra: 14 Campbell Tc's + 10 on South Tower  $\Rightarrow$  5 more somewhere (??)  
24 Omegas  
5 RTD's

Where are all the Campbell Tc's going on middle Tower!

(??) use Omegas as Reference Tc's ??

or put mux's in box w/ logger!!

+ 25T have their own Reference

### Plan

- $\Rightarrow$  Main Tower Take down  $\Rightarrow$  ① Downlead logger  
② Leave connected & running & TEST Thermocouples (Dump in ice water)  
Also Find out what's running & what's not?  
③ THEN Take apart & Label everything (if not already labelled)  
④ Repeat for south Tower!  
⑤ Move heat flux plates & RTD's // calibrate RTD's along the way  
(can leave connected to 23ra  $\Rightarrow$  just move THE multiplexer)

Take apart  $\Rightarrow$  (4)  $\Rightarrow$  may want to put up WOOD on middle tower & use U-bolts thru, WOOD on UNISTRUT!  
To MOUNT STUFF vertically AT BOTTOM

④ For Thermocouples  $\Rightarrow$  TRY to put mux in box w/ data logger so I can use panel TEMP AS REFERENCE!!

6/01 Preparation - OCEV Down by 12:00

New cal standard

Crip & 345.4 ppm

| RUN | ZERO  | SPAN<br>T | P   | V    | Sample<br>T | P   | V    | ICC-7             |
|-----|-------|-----------|-----|------|-------------|-----|------|-------------------|
| 1   | 0.000 | 30.35     | 825 | 1360 | 30.39       | 829 | 1531 | 405.35            |
| 2   | "     | 30.45     | 824 | 1359 | 30.49       | 823 | 1538 | <del>408.11</del> |
| 3   | "     | 30.57     | "   | 1359 | 30.64       | "   | 1531 | 405.79            |
| 4   | "     | 30.76     | "   | 1358 | 30.82       | 821 | 1531 | 405.39            |
| 5   | "     | 30.93     | 823 | 1357 | 30.96       | 822 | 1531 | 406.34            |

405.47 ppm  
± 0.22 (1σ)

Selected cable

9-pin AMO

- 1 signal
- 2 sig. grd
- 3
- 4 +12
- 5 Pow. Grd.
- 6

New std. on AT 3:30 PM

Main Tower Tc's

- PINE SW Temp - Zen pine
- SOIL T A 30cm - At Pine Root
- PINE HW Temp -
- SOIL T D 10cm - Root - Spruce
- SOIL T B 8cm - Root - Fir
- SOIL T C - Root - Fir

8/23/01

~10:15

changed dessicant in profiler

~10:30

New program in Fast23x

Fast23x5.csj

Saves Licor diagnostics to Fin. St. #2

② working - I THINK

5 min Averages

8/24/01

26 m cable

|     |   |   |        |            |
|-----|---|---|--------|------------|
| AMP | 1 | → | white  | } wind dir |
|     | 2 | → | BLK    |            |
|     | 3 | → | sh     |            |
|     | 4 | → | GRN    | } wind spd |
|     | 5 | → | BLK    |            |
|     | 6 | → | SHIELD |            |
|     | 7 | → | RED    | } +12V     |
|     | 8 | → | BLK    |            |
|     | 9 | → | shield |            |

cable looks; Tested THS 16 m ov tower - looks OK.

16 m cable

|   |   |        |            |
|---|---|--------|------------|
| 1 | - | RED    | } +12V     |
| 2 | - | BLK    |            |
| 3 | - | SHIELD |            |
| 4 | - | WHT    | } 0V (Ref) |
| 5 | - | BLK    |            |
| 6 | - | NC     |            |
| 7 | - | GRN    | } 0V (Ref) |
| 8 | - | BLK    |            |
| 9 | - | SHI    |            |



16 m vane

Wind Speed

| RPM (motor)          | V             |
|----------------------|---------------|
| off                  | 0.03 (3.2 mV) |
| 1000                 | 234 mV        |
| <del>1500</del> 1500 | 349           |
| 2500                 | 580           |
| 3500                 | 811           |
| 4499                 | 1042          |
| 5500                 | 1275          |
| 6500                 | 1508.5        |
| 0                    |               |
| 500                  | 118           |
| 700                  | 165           |
| 332                  | 79            |
| 425/419              | 102/100       |
| 242                  | 61            |
| 0                    | 0.03          |

3rd vane

|      |      |
|------|------|
| 0    | 0.00 |
| 1500 | 0.00 |

$$V_{16} = 2.89 + 0.2311 (\text{RPMs})$$

$\pm 8 \times 10^{-5}$

$$\frac{10}{26} = 1.039$$

26 m Vane

Wind speed

\* Not good well

| RPM              | V               |
|------------------|-----------------|
| 0                | 102 mV (offset) |
| 1500             | 414             |
| 1000             | 303             |
| 2000             | 524             |
| 2500             | 634             |
| !! 3500 unsteady | 850             |
| 475-3515         |                 |
| 4500             | 1084            |
| <del>5500</del>  |                 |
| 4771             | 1137            |
| won't go faster  |                 |

Try new cable w/ grd

|      |                       |
|------|-----------------------|
| 500  | 187 (sec. $\pm 0.3$ ) |
| 1500 | 409                   |
| 2500 | 633                   |
| 3500 | 853                   |
| 4500 | 1084                  |
| 5500 | 1310                  |
| 6500 | 1539                  |
| 325  | 186                   |
| 0    | 0.100                 |

(mV)

$$V_{26} = 84.32 + 0.2224 (\text{RPMs})$$

$(\pm 0.0016)$

0.02224

## WIND DIRECTION

16 m V

| Angle ° | V    |
|---------|------|
| 50      | 0.04 |
| 60      | 0.52 |
| 120     | 1.03 |
| 180     | 1.57 |
| 240     | 2.08 |
| 300     | 2.60 |
| 360     | 3.13 |
| 420     | 3.66 |
| 480     | 4.18 |
| 540     | 4.71 |

↪ switches back

$$V_0 = -8.55 + 8.727(N.DIR.)$$

(mV)  $\pm 0.012$

For wind dir. slope

was using = 9.259  
(6% larger)

Wind spd. slope

= 50.00  
6% larger

26 m VANE

| Angle (°) | V                   |
|-----------|---------------------|
| 25°       | <del>1.9</del> 1.93 |
| 30        | 2.44                |
| 90        | 2.88                |
| 150       | 3.42                |
| 210       | 3.97                |
| 270       | 4.49                |
| 330       | 4.80                |
| 360       |                     |
| 5°        | 0.14                |
| 30°       | 0.27                |
| 60°       | 0.52                |
| 90°       | 0.74                |
| 120       | 0.99                |
| 150       | 1.23                |
| 180       | 1.50                |
| 210       | 1.80                |
| 240       | 2.09                |
| 270       | 2.33                |
| 300       | 2.60                |
| 330       | 2.85                |
| 360       | 3.11                |
| 390       | 3.38                |
| 450       | 3.93                |
| 540       | 4.75                |
| ↪ 25°     | 1.62                |

↪ switches BACK

$$V_0 = -17.53 + 8.728(W.dir.)$$

(mV)

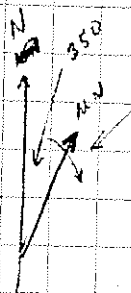

0.108

8/27 Calibrating 16m VANE at tower

With ~~new~~ set ring  $\Rightarrow$  looks like Vane reads  $20^\circ$  clockwise from magnetic North. Put in  $12^\circ$  declination (originally set to true N)  $\Rightarrow$  means we were  $8^\circ$  off.  
Reset to magn. N

| WIND DIRECTION<br>$^\circ$ | Logger $V_0$ | WIND speed<br>RPM | Logger $V_0$ |
|----------------------------|--------------|-------------------|--------------|
| 2                          | 3            | 0                 | 3.4          |
| 60                         | 528          | 520               | 122          |
| 120                        | 1043         | 700               | 165          |
| 180                        | 1585         | 1500              | 350          |
| 240                        | 2109         | 2500              | 580          |
| 300                        | 2623         | 3500              | 812          |
| 360                        | 3058         | 4500              | 1045         |
| 420                        | 3690         | 5500              | 1274         |
| 480                        | 4204         | 6500              | 1514         |
| 530                        | 4661         |                   |              |
| 540                        |              |                   |              |
| 550                        |              |                   |              |

$$V_0 = 1.74 + 47.337(U)$$

(mV)

$$V_0 = -7.17 + 8.795(\text{Wind dir})$$

(mV)

$$2.54 \quad 0.7311$$

2) 16m VANE ON AT 3:30 - Appears to be working, but need to check tomorrow!  
 $\Rightarrow$  set to Magnetic North (not true North)

8/30/01

Worked on 26m VANE

⊛ NOTE - THE way I set the wind direction on 16m VANE may be wrong  $\Rightarrow$  set up 26m VANE just below 16m VANE for comparison

Wind direction seemed to be working:

| Wind Dir           | mV                 |
|--------------------|--------------------|
| 0                  | 23 → FLIPS TO 3330 |
| 60                 | 558                |
| 120                | 1110               |
| 180                | 1615               |
| 240                | 2184               |
| 300                | 2720               |
| 360                | 3284 ←             |
| 420                | 3821               |
| 480                | 4375               |
| <del>540</del> 530 | 4866               |
| 6                  | 64                 |

Hooked up calibration meter  $\Rightarrow$  was not working ???  
 Went ahead & mounted vane at 13m for comparison of wind direction - when I hooked up  $\Rightarrow$  wind speed now appears to be working (at 12:00 PM)

$\Rightarrow$  Back at trailer - noted wind speed on 16m vane quit working ???!

$\Rightarrow$  looks like shield on 26m vane w.spd shorted out the 16m wind speed. Turned power off/on  $\Rightarrow$  then 16m vane appeared to be working!

Ⓢ RH sensor at 2m not working  
 Temp. is working  $\Rightarrow$  seems to be getting 12V  
 (need to check cables)

$\Rightarrow$  looks like wind dir. on 16m vane needs to be reset  
 (probably just offset)

#### VANE HEIGHTS

RW4 16m = 15m  
 RW4 26m = 13m  
 Handar 9 = 9.35m  
 Handar 6 = 6.7m (should check this)



- 9/1
- Bottom breaker popped day before.
  - NO UNDERCANY wind
  - Propvanes  $\Rightarrow$  wind direction looks OK
    - $\Rightarrow$  wind speed - screwed up (very windy)
    - $\Rightarrow$  16m vane "came to life" while watching data

- 9/4
- UNDERCANY logger still not working !!?
  - (Breaker is OK  $\Rightarrow$  7500 RUNNING)
  - Wind speeds on props look screwy
    - 16m vane 10 (But very light winds)
    - 26m vane  $\sim$  400 mV ???
    - TRY grounding better.

Looking AT DATA from 8/30 onward

WIND DIR. on 16m vane seems fine

on 26m vane is crazy (all over the place)

WIND SPD on 16m vane is OK  $\Rightarrow$  but dies often

26m vane is OK  $\Rightarrow$  but dies almost the whole time

(when wind spd data is there - looks OK)

9/5/01 At site

- Downloaded 23x + 21x MIDDLE TOWER BLANKEN'S DATA LOGGER
- Hooked Battery charger + battery TO UNDERCANY 23x (BATTERY voltage was AT 4.8V = Not 12V)
- Re-Downloaded program - seemed to be working AT DATA logger - but NOT seeing data AT SUN  $\Rightarrow$  need to figure out what's going on. check short haul modems!!
- Propvanes still look screwy

W) P. Blanken - decided North Tower is the best place to set up experiment for spring!

Not working

9/6/01 Redial the ground on RMY vanes  
Not sure it helped any

(E35a)

P2a, P2b, ~~F35a~~, F35b  
S33a, S33b, Fa, Fb, Pa,  
Pb, Sa, Sb,

Calibration of forest sensor  
STARTING w/ 23x2 logger

11:30 → 3:10

| Program Name | <del>New</del> NAME | H <sub>2</sub> O<br>BATH | H <sub>2</sub> O<br>TEMP (Handheld)<br>Tc |
|--------------|---------------------|--------------------------|-------------------------------------------|
| RTD 1        | 0.0051              | R 1                      | 16.82                                     |
| RTD 2        | 0.560               | R 2                      | 13.91                                     |
| RTD 3        | 0.658               | R 3                      | 17.18 (.39)                               |
| RTD 4        | 0.977               | R 4                      | 15.30                                     |
| RTD 5        | 0.0205              | R 5                      | 14.682                                    |

| Tree 1    |                        | T 1  |         |        |               |
|-----------|------------------------|------|---------|--------|---------------|
| P-root    | -0.0895 // 0.156       | T 2  | 0       | 16.3   | 14.9 ✓        |
| F-root    | 0.74 - 0.816           | T 3  | 0       | 16.67  | 16.0 ✓        |
| S-root    | 0.82 → 1.21            | T 4  | 0       | 17.58  | 15.9 ✓        |
| P-sap     | 1.24                   | T 5  | 0       | 16.33  | 15.3 ✓        |
| F-sap     | 0 0.658                | T 6  | 0       | 16.44  | 15.9 ✓        |
| S-sap     | 0 1.63                 | T 7  | 0       | 16.69  | 16.3 ✓        |
| P-heart   | 1.00 → 0.68 - 0.75     | T 8  | 0 (H2O) | 16.72  | 14.35         |
| F-heart   | 0 0.46                 | T 9  |         | 16.77  | 16.1 ✓        |
| S-heart   | 0 1.21                 | T 10 | 0       | 16.65  | 16.1 ✓        |
| P2-root   | 0 -0.57 →              | T 11 | 0       | 15.72  | 15.3 ✓        |
| F35-root  | -1.29 / (-1.26)        | T 12 | 0       | 12.25  | 12.5 ✓        |
| S33-root  | 0 0.84                 | T 13 | 0       | 13.52  | 13.7 ✓        |
| F37-root  | 0 -0.74 → -0.61        | T 14 | 0       | 13.34  | 14.0          |
| S39-root  | 0 -0.474 → -0.58       | T 15 | 0       | 13.94  | 14.0 ✓        |
| P2-sap    | -2.14 - 3.06           | T 16 | 0       | 10.95  | 12.3 ✓        |
| F35-sap   | -0.92                  | T 17 |         | 12.18  | 12.9 ✓        |
| S33-sap   | 0 -0.4 - 0.68          | T 18 | 0       | 13.25  | 13.8 ✓        |
| F37-sap   | 0 -0.61 → -0.66        | T 19 | 0       | 13.94  | 13.9 ✓        |
| S39-sap   | 0 -0.09 → -0.03        | T 20 | 0       | 14.14  | 14.7          |
| P2-heart  | -2.105 // -1.89        | T 21 | 0       | 11.14  | 12.4 ✓        |
| F35-heart | -0.69 - -0.67          | T 22 |         | 14.27  | 13.2 ✓        |
| S33-heart | 0 -0.026               | T 23 | 0       | 13.07  | 13.9 ✓        |
| F37-heart | 0 -0.22                | T 24 | 0       | 13.59  | 14.3 ✓        |
| S39-heart | -0.019 → -0.047        | T 25 |         | 15.13  | 16.7          |
| Tree 2    | -0.313 // -0.28        | T 26 |         | 17.059 | 16.2 ✓        |
| Tree 3    | 0.40 (set for 25 min.) | T 27 |         | 12.581 | 12.3°C (-0.1) |

Resistance Ratio in Ice

|               |         |
|---------------|---------|
| $R_s/R_o$ - 1 | 1.00000 |
| 2             | 1.0022  |
| 3             | 1.0026  |
| 4             | 1.0038  |
| 5             | 1.0001  |

AT TRAILER

12 Campbell Tcs

4 SMP 615's

4 Omega Tcs

New Standard on AT 3:30 — No calibration

7/14

New @ AIR

JACK DOWN SOUTH Tower Station —

615 WIRING

(DCC) H7

- GREEN

+12V

- RED

C7

Orange

G

- BLUE &amp; CLEAR

USE 23A + AM25T TO TEST TcsTIME

15:50

(into ice)

REF TEMP = 20.9

 $\Rightarrow 20.78$ HANDHELD  $\Rightarrow 20.8 \rightarrow 21.0$  $\Rightarrow 20.6$ Ice Temp  $\pm 0.1^\circ\text{C} \Rightarrow 0.3^\circ\text{C}$  (other handheld)

OUT OF ICE 16:50

(\*) water bath changing Temp —

Ref. Temp = 20.71

Handheld = 20.6

Bath Temp = ~~19.7~~<sup>19.6</sup>  $18.6 - 19.8^\circ\text{C}$  AT 16:30

Handheld = 19.7

## THERMOCOUPLES - Acc Campbells

|                |          | Visual Aug. (Ice) | Logsk (Ice) | Vis. Aug. (BATH) | m     | Logsk (BATH) |
|----------------|----------|-------------------|-------------|------------------|-------|--------------|
| (A)            | 1        | 0.34              | 0.323       | 19.76            | 1.073 | 19.70        |
| Soil T 10cm    | 2        | 0.17              | 0.15        | 19.74            | 1.064 | 19.69        |
| Fir SW T       | 3        | 0.32              | 0.33        | 19.67            | 1.079 | 19.61        |
| Fir HW         | 4        | 0.04              | 0.036       | 19.67            | 1.062 | 19.63        |
| —              | 5        | 0.05              | 0.047       | 19.73            | 1.059 | 19.68        |
| Soil T B 3cm   | 6        | 0.76              | 0.86 (?)    | 19.78            | 1.103 | 19.71        |
| Soil T 10cm    | 7        | 0.09              | 0.09        | 19.62            | 1.068 | 19.56        |
| Spr. NW T      | 8        | 0.11              | 0.09        | 19.68            | 1.064 | 19.64        |
| Fir HW T       | 9        | 0.85 Spr Sep T    | 0.83 (?)    | 19.70            | 1.064 | 19.63        |
| Pine HW T      | 10       | 0.34              | 0.42        | 19.67            | 1.085 | 19.59        |
| Soil T A 3cm   | 11       | 0.14              | 0.19        | 19.63            | 1.073 | 19.57        |
| W Soil 10cm    | 12       | 0.74              | 0.63 (?)    | 19.79            | 1.090 | 19.72        |
| SE soil T 10cm | 13       | 0.18              | 0.17        | 19.74            | 1.067 | 19.67        |
| SE soil T 3cm  | 14       | 0.60              | 0.58        | 19.73            | 1.090 | 19.66        |
| NW soil 3cm    | 15       | 1.27              | 1.19 (?)    | 19.75            | 1.125 | 19.68        |
| Pine SW T      | 16       | 1.14              | 1.14 (?)    | 19.76            | 1.124 | 19.65        |
| (T26)          | 17       | 1.33              | 1.33 (?)    | 19.76            | 1.133 | 19.69        |
| Pine #2 Hrt    | 18       | 0.38              | 0.41        | 19.71            | 1.081 | 19.66        |
| Pine #2 Sep    | 19       | 0.48              | 0.50        | 19.88            | 1.078 | 19.79        |
| Pine #2 Root   | 20       | 0.39              | 0.42        | 19.82            | 1.077 | 19.74        |
| Spr 33 Hrt     | 21       | 0.08              | 0.11        | 19.75            | 1.063 | 19.67        |
| Spr 33 Root    | 22       | 0.02              | 0.10        | 19.82            | 1.058 | 19.75        |
| Spr 33 Sep     | 23       | 0.02              | 0.03        | 19.77            | 1.057 | 19.70        |
| Fir 3 Hrt      | 24 (T22) | 0.06              | 0.07        | 19.67            | 1.064 | 19.61        |
| Fir 2 Sep      | 25       | 0.83              | 0.84 (?)    | 19.83            | 1.101 | 19.73        |

Ref Temp

~~20.70~~

20.70

Hano Held Ref

~~20.8~~ ± 0.1

Hano Held Ref

20.8

(4)

20.69

19.6-19.7°C

20.6



9/18/01 2ND Round of Tc's

From logger ICE

H<sub>2</sub>O BATH

|         |        |                   |                      |        |           |             |
|---------|--------|-------------------|----------------------|--------|-----------|-------------|
| HP well | B1     | (*)               | -0.03                | 1.0065 | 19.84     | F35 Root    |
|         | B2     | (*)               | -0.03                | 1.0040 | 19.89     | F37 sap     |
|         | B3     | (*)               | -0.03                | 1.0060 | 19.85     | S39 root    |
|         | B4     | (*)               | -0.02                | 1.0035 | 19.91     | S39 sap     |
|         | B5     | (*)               | -0.006               | 1.0050 | 19.89     | S39 Int     |
|         | B6     | (*)               | -0.03                | 1.0065 | 19.84     | F.R 37 Root |
|         | B7     | (*)               | -0.05                | 1.0045 | 19.86     | 37 (?)      |
|         | B8     | →                 | ?                    | 1.0050 | 19.90 (?) |             |
|         | B9     | (*)               | -0.13                | 1.0070 | 19.73     | ←           |
|         | B10    | Not working       |                      |        |           |             |
|         | B11    |                   | -0.18                | 1.0055 | 19.71     |             |
|         | B12    | too short (15.74) |                      |        |           |             |
|         | B13    | -0.08             | <del>15.74</del> Ice | 1.0055 | 19.81     |             |
|         | B14    |                   | -0.02                | 1.0076 | 19.83     |             |
|         | B15    |                   | 0.05                 | 1.0013 | 19.8      |             |
|         | B16    |                   | -0.05                | 1.007  | 19.81     |             |
|         | B17    |                   | -0.002               | 1.009  | 19.82     |             |
|         | B18    |                   | -0.12                | 1.004  | 19.80     |             |
|         | B19    |                   | -0.04                | 1.003  | 19.91     |             |
|         | B20    |                   | -0.12                | 0.9985 | 19.91     |             |
|         | B21    |                   | -0.06                | 1.0035 | 19.87     |             |
|         | B22    |                   | -0.13                | 0.9985 | 19.90     |             |
|         | B23    |                   | -0.14                | 0.9985 | 19.89     |             |
|         | B24    |                   | -0.06                | 1.0045 | 19.85     |             |
|         | B25    |                   | -0.13                | 1.0030 | 19.81     |             |
|         | Ref. = |                   | 14.63                |        | 16.45     |             |

Starting RUNNING in ICE

AT 11:10

REF TEMP (HANDHELD) = 14.4°C - 14.5°C

ICE TEMP (HANDHELD) = 0.2°C

H<sub>2</sub>O BATH 11:42

AT 20.0°C

New Dessicant on mollier 12:30

PLUGGED IN Heater on RAIN GAUGE

DOWNLOADED 23x, 21(dendron), 10(N.Tower)

| 615                     |                      |          |                |       |   | South Tower           |         |
|-------------------------|----------------------|----------|----------------|-------|---|-----------------------|---------|
| Time                    | 1 <sup>st</sup> Peak | Slope    | #              | Tower |   | Cable length = 0.905m |         |
| 11:15                   | .964                 | 1.164    | 131            | M     |   | u/114                 | = 0.961 |
| Have heard DELAY = 0.83 |                      |          |                |       |   |                       |         |
| 11:30                   | "set to 0"           | .184     | 131            | M     |   |                       |         |
| 11:40                   | 0.975                | 1.087    | 132            | M     |   |                       |         |
| 11:46                   | UH 14% 0.98ms        | 0.962    | 1.038          | 68    | S |                       |         |
| 11:52                   | 14% 0.98ms           | 0.966    | 1.050          | 134   | S |                       |         |
| 11:56                   | 15% 0.98ms           | 0.961    | 1.149          | 114   | S |                       |         |
| 12:20                   | 11% 0.96ms           | 0.963    | 1.161          | 131   | M |                       |         |
| 12:25                   | 11% 0.96ms           | 0.969    | 1.169          | 132   | M |                       |         |
| 12:40                   | 38% 1.02ms           | 0.965    | 1.189          | 114   | S |                       |         |
| 12:42                   | 52% 1.02ms           | 0.965    | 1.093          | 134   | S |                       |         |
| 12:43                   | 38% 1.02ms           | 0.961    | 1.049          | 68    | S |                       |         |
| 13:00                   | 54% 1.11ms           | 0.961    | 1.165          | 131   | M |                       |         |
| 13:02                   | 54% 1.11ms           | 0.965    | 1.157          | 132   | M |                       |         |
| 13:10                   | 24% 0.94ms           | 0.965    | 1.201          | 114   | S |                       |         |
| 13:12                   | 24% 0.94ms           | 0.969    | 1.105          | 134   | S |                       |         |
| 13:14                   | 24% 0.94ms           | no power | 68             | S     |   |                       |         |
| 13:50                   | 47% 1.07             | 0.968    | 1.068          | 132   | M |                       |         |
| 13:50                   | " "                  | 0.964    | 1.008(1.176)   | 131   | M |                       |         |
| 13:56                   |                      | 0.966    | (1.042)(1.206) | 114   | S |                       |         |
|                         |                      | 0.970    | (1.100)(1.266) | 134   | S |                       |         |
| 13:14:00                |                      | 0.970    | (1.058)( )     | 68    | S |                       |         |

12:30 add unknown "m"  
UH 30% max → 15% within 20 seconds

(\*)

DEAD!!

## 9/20 Denrometers

- At N-Tower - #2 4 & 8
- #8 - bad (N)
  - #9 looks good (mid)
  - #7 looks good (mid)
  - #6 " " "
  - #5 " " (mid)
  - #4 looks shitty (N)
  - #3 - BAD (mid)
  - #2 - OK But not great (N)
  - #1 - looks OK
  - #10 - (S)

## TDR AGAIN

|          | <u>Peak</u> | <u>INT</u>   | <u>#</u>   | <u>Tower</u> |     |
|----------|-------------|--------------|------------|--------------|-----|
| 12:30    | <u>.976</u> | <u>1.236</u> | <u>134</u> | <u>5</u>     | (X) |
|          | .976        | 1.196        | 114        | 5            |     |
| 12:30-35 | .966        | 1.106        | 132        | M            |     |
|          | .966        | 1.256        | 131        | M            |     |

C Thermocouples

|       |     | <u>ICE</u>  | <u>BATH</u> |                                          |
|-------|-----|-------------|-------------|------------------------------------------|
| C1    | (*) | -0.09       | 19.84       | 1.0035 Psoil T 10cm                      |
| C2    | (*) | -0.08       | 19.86       | 1.0025 <del>Psoil T 10cm</del> Stem Temp |
| C3    | (*) | -0.03       | 19.89       | 1.0010 Psoil T 3cm                       |
| C4    | (*) | -0.03       | 19.84       | 1.0065 No label                          |
| C5    | (*) | -0.03       | 19.88       | 1.0045 P. NO 32 root                     |
| C6    | (*) | 0.007       | 19.86       | 1.0071 Ssoil T 10cm                      |
| C7    | (*) | 0.0075      | 19.86       | 1.0070 Fir 34 Root                       |
| C8    | (*) | 0.02        | 19.83       | 1.0086 Spruce 38 Root                    |
| C9    | (*) | 0.03        | 19.86       | 1.0086                                   |
| C10   | (*) | 0.04        | 19.84       | 1.0102 10cm                              |
| C11   | (*) | 0.097       | 19.86       | 0.9993 1.012 10cm                        |
| C12   | '   | -0.27       | 19.88       | 0.9993                                   |
| C13   | (*) | -0.095      | 19.85       | 0.9995 1.0022                            |
| C17   |     | -0.16       | 19.85       | 1.0055 0.9995                            |
| C15   | (*) | -0.03       | 19.86       | 1.0069 1.0055                            |
| C16   | (*) | -0.002      | 19.86       | 1.0069 1.0069                            |
| C12   | (*) | -0.006      | 19.86       | 1.0068                                   |
| C18   | (*) | -0.003      | 19.91       | 1.0086 1.0044                            |
| C19   | (*) | 0.0008      | 19.83       | 1.0086                                   |
| C20   |     | Not working |             |                                          |
| C21   | (*) | 0.03        | 19.86       | 1.0086                                   |
| C22   | (*) | 0.08        | 19.83       | 1.013                                    |
| C23   | (*) | -0.03       | 19.81       | 1.0081                                   |
| C24   | (*) | -0.002      | 19.83       | 1.0085                                   |
| C25   | (*) | 0.05        | 19.85       | 1.0104                                   |
| 1702. |     | 15.19       | 17.95       |                                          |

RANGE

3cm

(Camp)

9/26/81

TDR AGAIN

Time = 10:30 AM

| $1^{\text{st}}$ peak | Int          | #   | Tower |
|----------------------|--------------|-----|-------|
| 0.96                 | 1.18 (Hump)  | 114 | S     |
| 0.97                 | 1.19 (1.15?) | 134 | S     |
| 0.97                 | 1.09 (?)     | 132 | S     |
| 0.97                 | 1.200 (?)    | 131 | M     |
|                      |              |     | M     |

Site map

1" = 0.5 m

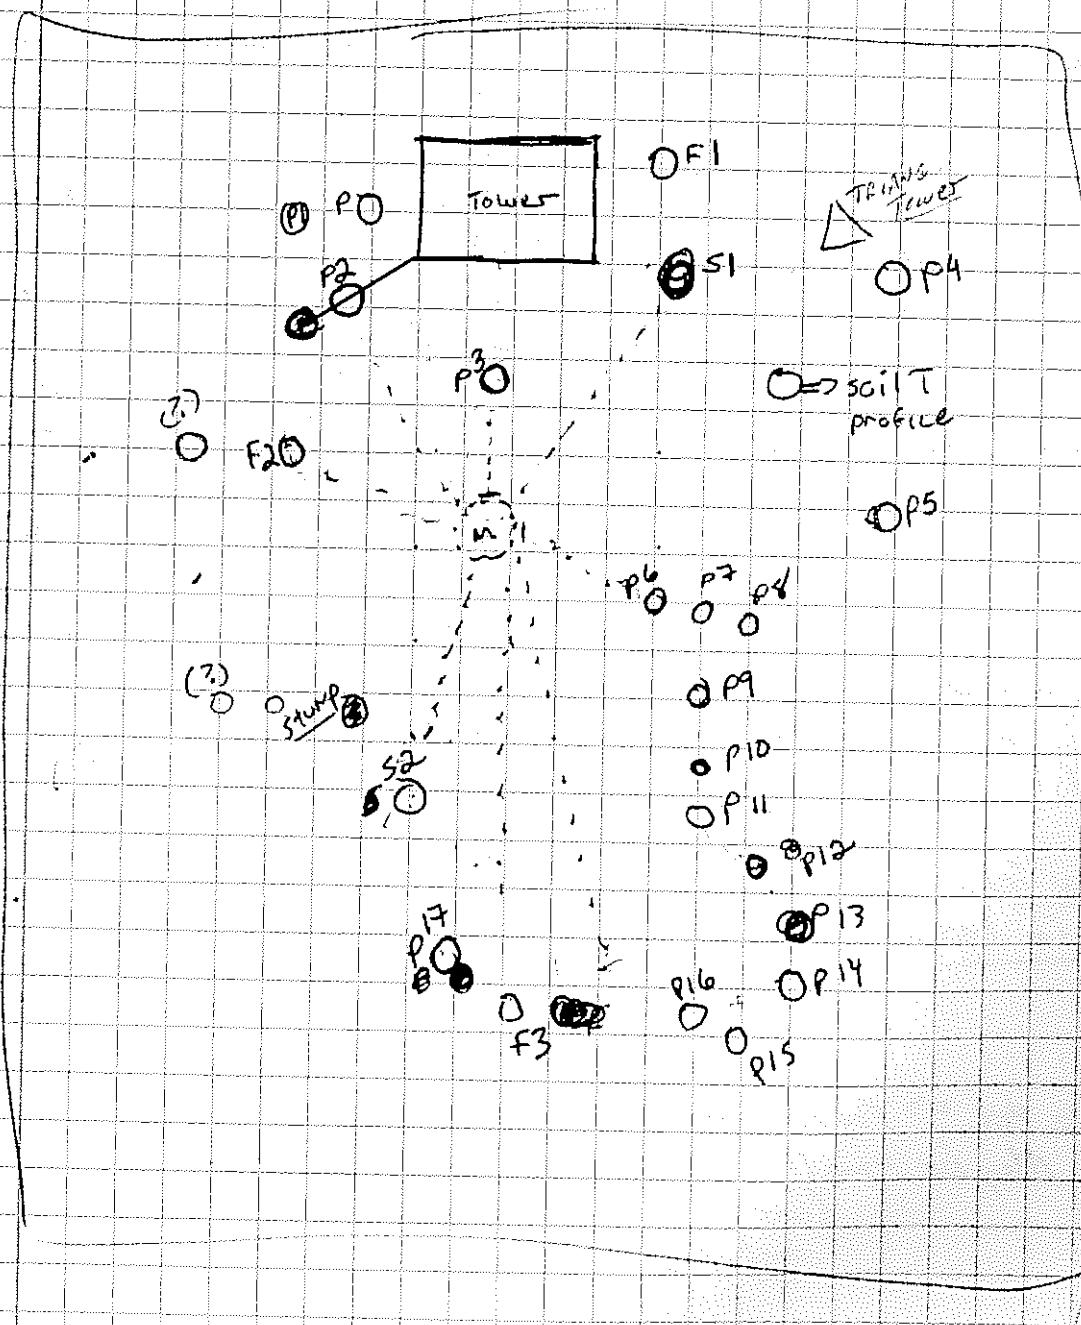



Next Round of Tc's

①

|    | Ice           | H <sub>2</sub> O<br>BATH | set at 20.3              |
|----|---------------|--------------------------|--------------------------|
| 1  | 0.08 *        | <del>20.07</del> 20.07   | 0.986                    |
| 2  | 0.08 *        | <del>20.07</del> 20.12   | 0.983                    |
| 3  | 0.17 *        | <del>20.12</del> 20.12   | 0.9875                   |
| 4  | 0.08 *        | <del>20.12</del> 20.09   | 0.9845                   |
| 5  | 0.04 *        | <del>20.09</del> 20.06   | 0.9890                   |
| 6  | 0.03 *        | <del>20.06</del> 20.10   | 0.9816                   |
| 7  | 0.04 *        | <del>20.10</del> 20.07   | 0.9835                   |
| 8  | 0.03 *        | <del>20.07</del> 20.07   | 0.9830                   |
| 9  | 0.06 *        | <del>20.07</del> 20.10   | 0.9830                   |
| 10 | 0.13 *        | 20.08                    | 0.9875                   |
| 11 | No connection |                          |                          |
| 12 | 0.36 ] ?      | 20.23                    | 0.9914                   |
| 13 | 0.49 ] ?      | 20.20                    | 0.9925                   |
| 14 | 0.49 ] ?      | 20.17                    | 0.9910                   |
| 15 | 0.06          | 20.13                    | 0.9816                   |
| 16 | 0.16          | 20.06                    | 0.9895                   |
| 17 | 0.11          | 20.14                    | 0.9835                   |
| 18 | 40.70 (??)    | 24.24                    | <del>0.9827</del> 0.9827 |
| 19 | BAD           |                          |                          |
| 20 | 0.16          | 20.53                    | 0.967                    |
| 21 | 0.36 ] ?      | 20.26                    | <del>0.989</del> 0.990   |

No more

Ref Handheld = 22.3

Ref = 20.88 (DRIFTING)

Handheld

22.21

13:30 =&gt; in ice

15:30 =&gt; in bath =&gt; 20.3°C =&gt; went up to 20.6 THEN

4:00 = 19.7°C =&gt; stayed till 4:25 - 4:30

Downloaded data

New CO<sub>2</sub> std. => Scott Martin Tank 3419 ppmMaybe small leak somewhere in the line  
(not in regulator, except for maybe past  
shot-off valve.)

For hooking up  $\Rightarrow$  have 3 Tc mux's = numbered I, II, III  
(Each w/ 25 Tc's)

Will relabel Tc AS we hook THEM IN AS: I-1, etc.

Below is a map To give

| mux I |        |            |                       | mux II |        |            |                       |
|-------|--------|------------|-----------------------|--------|--------|------------|-----------------------|
| Tc    |        | Col. Label | Location              | Tc     |        | Col. Label | Location              |
| 1     | ✓      | —          | S1 - Tapwood 1.5m     | 1      | ✓      | —          | S1 - Tapwood 1.5m     |
| 2     | ✓      | —          | S1 - hrtwd 1.5m       | 2      | ✓      | —          | S1 - hrtwd 1.5m       |
| 3     | ✓      | A5         | S1 - 6.5m             | 3      | ✓      | A5         | S1 - 6.5m             |
| 4     | ✓      | A21        | S1 - root (5cm)       | 4      | ✓      | A21        | S1 - root (5cm)       |
| 5     | soil 1 | A2         | S1 $\rightarrow$ M 1m | 5      | soil 1 | A2         | S1 $\rightarrow$ M 1m |
| 6     | soil 2 | A13        | S1 $\rightarrow$ M 2m | 6      | soil 2 | A13        | S1 $\rightarrow$ M 2m |
| 7     | ✓      | A8         | P3 - bole 1.5m        | 7      | ✓      | A8         | P3 - bole 1.5m        |
| 8     | ✓      | A4         | P3 - bole 0.5m        | 8      | ✓      | A4         | P3 - bole 0.5m        |
| 9     | ✓      | A6         | P3 - base             | 9      | ✓      | A6         | P3 - base             |
| 10    | ✓      | A18        | P3 - soil             | 10     | ✓      | A18        | P3 - soil             |
| 11    | ✓      | A22        | P2 - bole 1.5m        | 11     | ✓      | A22        | P2 - bole 1.5m        |
| 12    | ✓      | A19        | P2 - bole 0.5m        | 12     | ✓      | A19        | P2 - bole 0.5m        |
| 13    | ✓      | A17        | P2 - Bole - base      | 13     | ✓      | A17        | P2 - Bole - base      |
| 14    | ✓      | A23        | P2 - soil             | 14     | ✓      | A23        | P2 - soil             |
| 15    | soil 3 | A3         | P2 $\rightarrow$ M 1m | 15     | soil 3 | A3         | P2 $\rightarrow$ M 1m |
| 16    | soil 4 | C3         | P2 $\rightarrow$ M 2m | 16     | soil 4 | C3         | P2 $\rightarrow$ M 2m |
| 17    | ✓      | A11        | S1 - bole - base      | 17     | ✓      | A11        | S1 - bole - base      |
| 18    | ✓      | —          | P1 - sepwood          | 18     | ✓      | —          | P1 - sepwood          |
| 19    | ✓      | —          | P1 - hrtwood          | 19     | ✓      | —          | P1 - hrtwood          |
| 20    | ✓      | —          | F1 - sep              | 20     | ✓      | —          | F1 - sep              |
| 21    | ✓      | —          | F1 - hrt              | 21     | ✓      | —          | F1 - hrt              |
| 22    |        |            |                       | 22     |        |            |                       |
| 23    |        |            |                       | 23     |        |            |                       |
| 24    |        |            |                       | 24     |        |            |                       |
| 25    |        |            |                       | 25     |        |            |                       |

Therefore  
mux's  
Tc location

## Mux III

|    | Tc |          | Cal. Label        | Location                |   |
|----|----|----------|-------------------|-------------------------|---|
| 57 | 1  | ✓        | D9                | P16 2m bole             | + |
| 58 | 2  | ✓        | D6                | P16 0.5m bole           | 0 |
| 59 | 3  | ✓        | D10               | P16 base bole           | ✓ |
| 60 | 4  | ✓        | D5                | P16 soil @ bole         | 0 |
| 61 | 5  | soil 112 | D8                | Soil 1m from P16        |   |
| 62 | 6  | soil 113 | D7                | Soil 2m from P16        |   |
| 63 | 7  | soil 114 | D2                | Soil 3m from P16        |   |
| 64 | 8  | soil 115 | D4                | Soil 4m from P16        |   |
| 65 | 9  | soil 116 | D3                | Soil middle 5m from P16 |   |
| 66 | 10 | ✓        | C11               | S2 2m bole              | + |
| 67 | 11 | ✓        | C10               | S2 0.5m bole            | 0 |
| 68 | 12 | ✓        | A10               | S2 base bole            | ✓ |
| 69 | 13 | ✓        | C7                | S2 base soil @ bole     | 0 |
| 70 | 14 | ✓        | C25               | F4 2m bole              | 1 |
| 71 | 15 | ✓        | <del>D9</del> D20 | F4 0.5m bole            | 0 |
| 72 | 16 | ✓        | C8                | F4 base bole            | ✓ |
| 73 | 17 | ✓        | C5                | F4 base soil @ bole     | 0 |
| 74 | 18 | ✓        | C1                | F2 2.0m bole            | 1 |
| 75 | 19 | ✓        | C4                | F2 0.5m bole            | 0 |
| 76 | 20 | ✓        | C2                | F2 base bole            | ✓ |
| 77 | 21 | ✓        | D1                | F2 base soil @ bole     | 0 |
| 78 | 22 | soil 117 | A1                | Soil 1m from F4         |   |
| 79 | 23 |          |                   |                         |   |
| 80 | 24 |          |                   |                         |   |
| 81 | 25 |          |                   |                         |   |

Thermocouples to be wary of: (Bad Zeros)

~~A6~~, A9, ~~A10~~, A12, A14, A15, A16, ~~A17~~, ~~A18~~, ~~A19~~, A20, A25

C12

~~D12~~, D13, D14, D21

4

11

8+7

5+5

4

6

5+5

5+5

6+8

11

8+7

5+5

## Mux II

|    | Tc |         | Col. Label | Location                          |            |
|----|----|---------|------------|-----------------------------------|------------|
| 31 | 1  | soil 5  | C6         | Soil 1m from P11                  |            |
| 32 | 2  | soil 6  | B1         | Soil 2m from P11                  |            |
| 33 | 3  | ✓       | B3         | P5 base soil @ bole               | 0          |
| 34 | 4  | ✓       | B4         | P5 base bole                      | ✓          |
| 35 | 5  | soil 7  | B5         | Soil 1m from P5                   |            |
| 36 | 6  | soil 8  | B6         | Soil 2m from P5                   |            |
| 37 | 7  | soil 9  | B7         | Soil 3m from P5                   |            |
| 38 | 8  | ✓       | A24        | P11 soil - base                   | 0          |
| 39 | 9  | ✓       | B2         | P11 <del>soil</del> bole - base   | ✓          |
| 40 | 10 | ✓       | C14        | P11 bole - 2m                     | —          |
| 41 | 11 | ✓       | B20        | P11 bole - 0.5m                   | 0          |
| 42 | 12 | ✓       | B13        | P6 soil - base                    | 0          |
| 43 | 13 | soil 10 | B8         | P6 → M - 1m                       |            |
| 44 | 14 | ✓       | B25        | P6 - <del>soil</del> bole - base  | ✓          |
| 45 | 15 | ✓       | D17        | P6 - bole - 2m                    | —          |
| 46 | 16 | ✓       | D15        | P6 - bole - 0.5m                  | 0          |
| 47 | 17 | ✓       | B19        | P5 - bole 2m                      | →          |
| 48 | 18 | ✓       | C21        | P5, bole 0.5m                     | 0          |
| 49 | 19 | soil 11 | A7         | P5 - clearing                     |            |
| 50 | 20 |         | B17        | Ref for mux III                   | !! 11/9/01 |
| 51 | 21 |         | D18        | P8 Branch 1m                      |            |
| 52 | 22 |         | D13        | P8 Branch 2m                      |            |
| 53 | 23 |         | B16        | P5 Branch 2m                      |            |
| 54 | 24 |         | B14        | P8 Branch to 42m - 35cm from bole |            |
| 55 | 25 |         | B23        | P8 Branch 0.57m - 13cm from bole  |            |

Column 8  
 P11  
 P5  
 P8  
 4.4  
 5.5



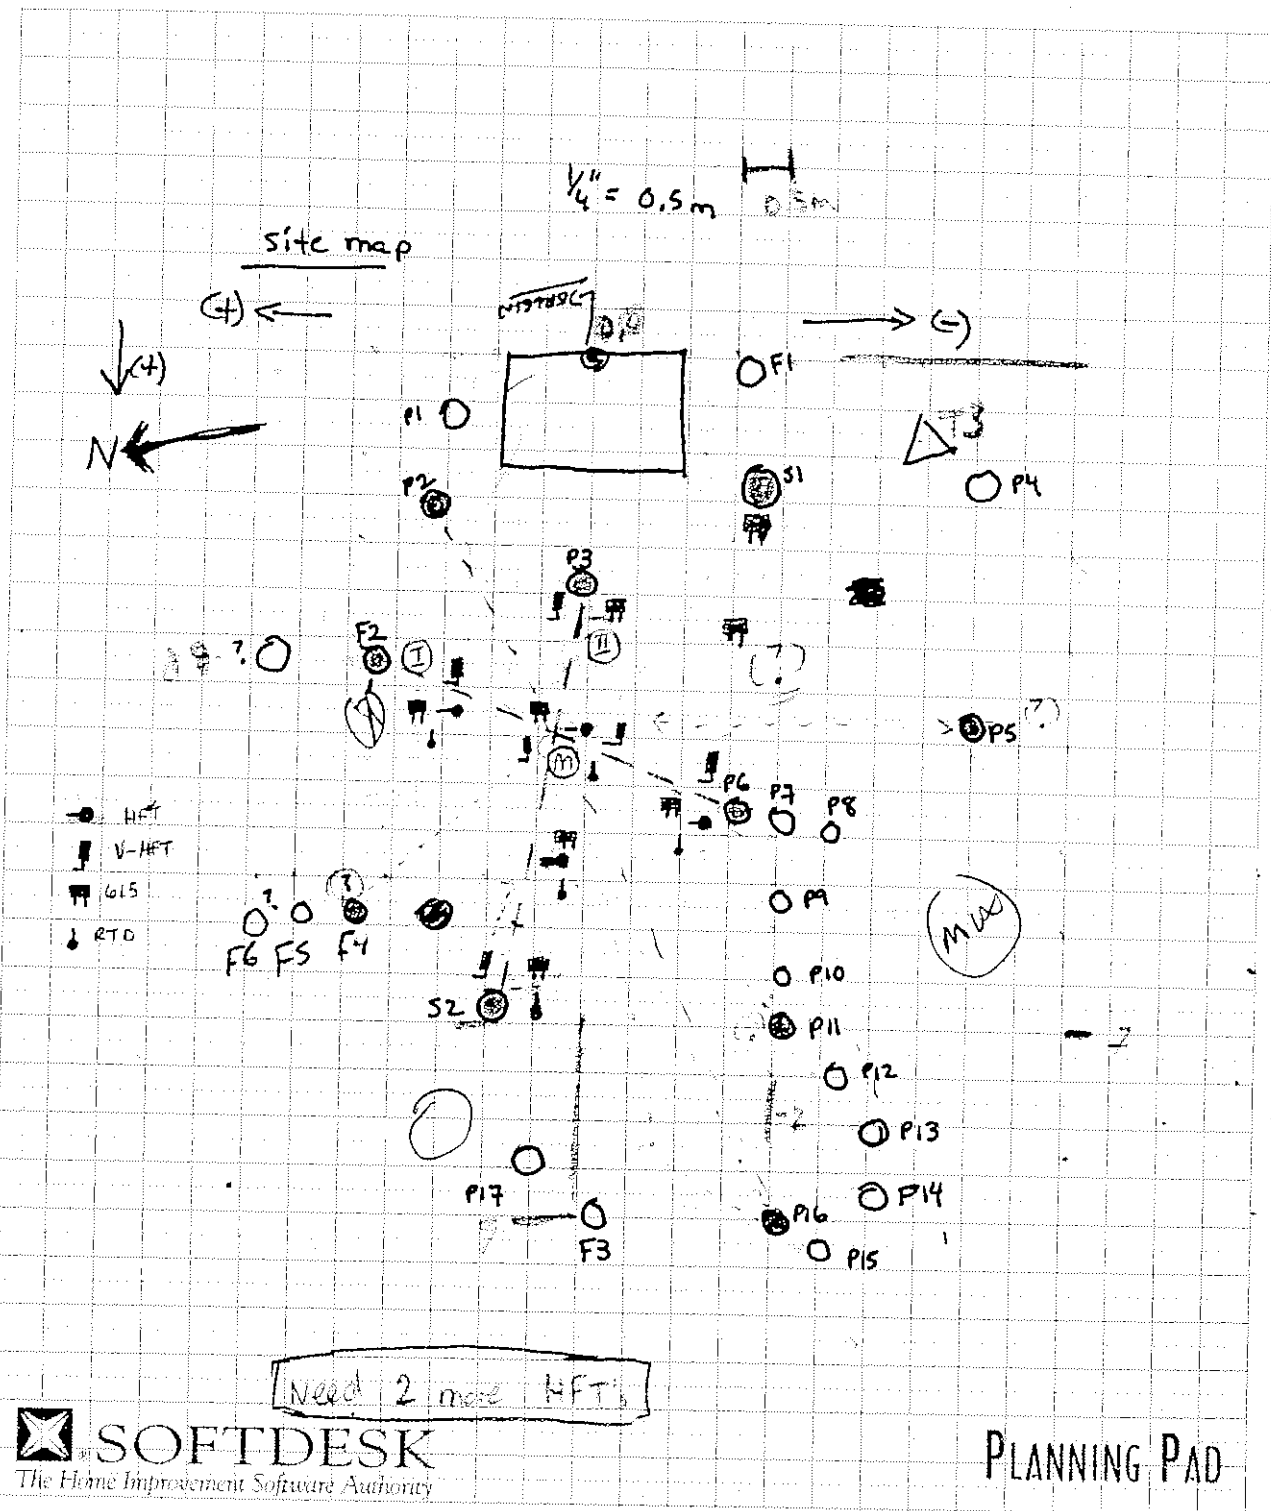

Phone: (816) 891-2800 • Fax: (816) 891-8018 • Internet: <http://www.softdesk.com>

Initial plan for sensorsTransect (I) (From F2  $\rightarrow$  P6)

3 Normal HFTs      3 vertical HFTs  
 3 GLSs  
 3 RTD

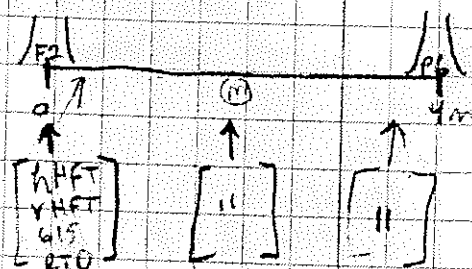Transect (II) (From P3  $\rightarrow$  S2)

3 vertical HFTs      1 (additional) Per. HFT  
 3 more GLSs  
 2 more RTDs

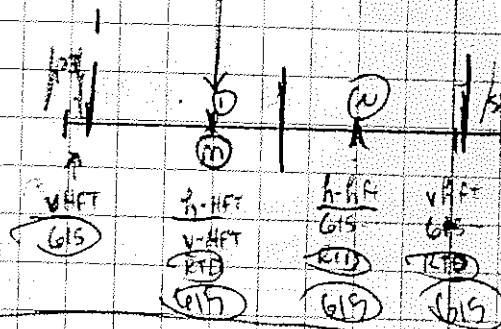Thermocouples

- ① Trees for gradients: P2, P3, S1, P5, F2, P6, S2 (?), P16, P11 (10 trees) F4  
 In each tree  $\Rightarrow$  Tc at 1.5, 0.5, BASE & SOIL (near root) = 4  
 $4 \times 10 = 40$  Tc's
- ② Needle Temp for P2, P3, S1 (maybe F1)  
 2 Heights for each tree       $3 \times 2 = 6$  Tc's
- ③ Soil Transects:

[ Transect 1  $\Rightarrow$  3 m Tc's every 1 m ] ✓

[ Transect 2  $\Rightarrow$  2 more (every 1 m) ] ✓

P2  $\rightarrow$  M  $\Rightarrow$  2 (1 m) ✓

S1  $\rightarrow$  M  $\Rightarrow$  3 (1/0.75 m) ✓

P11  $\rightarrow$  M  $\Rightarrow$  6 (1 m) ✓

P5  $\rightarrow$  M  $\Rightarrow$  3 (1 m)

P16  $\rightarrow$  M  $\Rightarrow$  6 (1 m) ✓

P  $\rightarrow$  M  $\Rightarrow$  2 (1 m)

27 Tc's

F4  $\rightarrow$  M  $\Rightarrow$  1 (1 m) ✓

$$\textcircled{1} + \textcircled{2} + \textcircled{3} = 73 \Rightarrow \underline{\underline{3 \text{ Tc max's}}}$$

Other SENSORS TO THINK ABOUT -

- PFED  $\Rightarrow$  Vertical distribution
- Long Wave Rad  $\Rightarrow$  Spatial distribution
- IR THERMISTOR  $\Rightarrow$

10/2/01

## IR Calibration -

| Time  | $I_{\text{peak}}$ | $I_{\text{int}}$ | #   | Tower       |
|-------|-------------------|------------------|-----|-------------|
| 11:00 | 0.776             | 1.120            | 134 | S           |
| 11:05 | 0.968             | 1.152            | 114 | S Screening |
|       | 0.972             | 1.072            | 132 | M           |
|       |                   |                  | 131 | M           |

DOWNLOADED 23x AT 11:15  $\Rightarrow$   
 THEN 23x - disconnected !!

## CO<sub>2</sub> calibrations

(1) OLD STANDARD (in small tank - not much left)  
 Span 345.7

| Run | ZERO | Span | P (mV) | T (°C) | V <sub>calc</sub> (mV) | Sample | T     | V    | [CO <sub>2</sub> ] ppm |
|-----|------|------|--------|--------|------------------------|--------|-------|------|------------------------|
| 1   | 0    | 793  | 27.90  | 1359   | ✓                      | 792    | 27.93 | 1535 | 407.24                 |
| 2   | 0    | 792  | 28.01  | 1358   | ✓                      | 792    | 28.06 | 1535 | 407.42                 |
| 3   | 0    | 792  | 28.13  | 1358   |                        | 792    | 28.19 | 1534 | 407.23                 |
| 4   | 0    |      |        |        |                        |        |       |      | 407.30 $\pm 0.11$      |

AG-1 (Air-Gas #1)

|   |       |     |       |      |     |       |      |                  |
|---|-------|-----|-------|------|-----|-------|------|------------------|
| 1 | 0     | 792 | 28.4  | 1357 | 792 | 28.44 | 1618 | 438.39           |
| 2 | 0.001 | 792 | 28.55 | 1356 | 792 | 28.59 | 1615 | 437.49           |
| 3 | 0     | 791 | 28.71 | 1355 | 791 | 28.86 | 1614 | 437.62           |
| 4 | 0     | 791 | 28.98 | 1354 | 791 | 29.01 | 1615 | 438.23           |
| 5 | 0     | 791 | 29.12 | 1354 | 790 | 29.18 | 1608 | 435.59           |
|   |       |     |       |      |     |       |      | 437.5 $\pm 0.95$ |

AG-2

|   |       |     |       |      |     |       |      |                   |
|---|-------|-----|-------|------|-----|-------|------|-------------------|
| 1 | 0     | 790 | 29.59 | 1352 | 789 | 29.63 | 1608 | 436.77            |
| 2 | 0.001 | 789 | 29.73 | 1351 | 789 | 29.77 | 1609 | 437.35            |
| 3 | 0.001 | 789 | 29.82 | 1351 | 789 | 29.83 | 1620 | 441.55 (BAD SPAN) |
| 4 | 0     | 788 | 30.55 | 1348 | 788 | 30.60 | 1603 | 436.43            |
| 5 |       | 788 | 30.74 | 1347 | 788 | 30.79 | 1604 | 437.07            |
|   |       |     |       |      |     |       |      | 436.91 $\pm 0.40$ |

was jumped?

|   | HFT | orientation (V/H) | location          |
|---|-----|-------------------|-------------------|
| ✓ | 1   | V                 | F2 base           |
| ✓ | 2   | V                 | middle of F2 - P6 |
| - | 3   | H                 | P3 base           |
| • | 4   | V                 | P3 base           |
| ✓ | 5   | V                 | P6 base           |
| - | 6   | H                 | P3 - 1m from P3   |
| • | 7   | V                 | middle of P3 - S2 |
| - | 8   | H                 | 1m from S2        |
| • | 9   | V                 | S2 base           |
| - | 10  | H                 | S2 base           |

615's (TDL-soil moisture)

1  
2  
3  
4  
5  
6  
7  
8  
9

- F2 base
- P3 base
- Middle of F2 - P6, ~1m from P3
- P6 base
- 1m from S2 (prev. middle tower)
- S2 base (prev. @ South tower)
- P11 - clearing
- P5 - clearing

RTD

1  
2  
3  
4  
5

- P11 - clearing
- P3 base
- 1m from P6
- 1m from S2
- S2 base

T<sub>c</sub> not working =  
B8, B10, C20, D11, D19

Heat flux  
plates (HFT)  
TDL's (615's)  
↓  
Soil Temp's (RTD)



# TDR-GIS calibrations

| Time  | Delay Mid | Del. S. | $\theta(m)$  | $\theta S$ | S-131 | S-114 | M-131                | M-132  |
|-------|-----------|---------|--------------|------------|-------|-------|----------------------|--------|
| 11:00 | 0.905     | 0.87    | 0.121        | 0.097      | 0.144 | —     | 0.100                | 0.184  |
| 10:30 | 0.988     | 0.895   | 0.176(0.168) | 0.115      | 0.22  | 0.22  | 0.23 <del>0.23</del> | 0.12 ? |
| 12:30 | 1.158     | 0.900   | 0.305        | 0.124      | 0.26  | 0.22  |                      |        |
| 12:35 | "         | 0.910   | 0.305        | 0.134      |       |       | 0.29                 | 0.14   |
| 11:40 | 1.026     | 0.824   | 0.204        | 0.071      |       |       | 0.184                | 0.112  |
| 11:50 | 0.992     | 0.88    | 0.179        | 0.105      | 0.087 | 0.188 |                      |        |
| 12:20 | 1.352     | 1.228   | 0.482        | 0.364      |       |       | 0.198                | 0.20   |
| 12:40 | 1.419     | 0.967   | 0.54         | 0.162      | 0.128 | 0.224 |                      |        |
| 13:00 | 1.383     | 1.008   | 0.505        | 0.191      |       |       | 0.204                | 0.192  |
| 13:10 | 1.357     | 1.015   | 0.48         | 0.196      | 0.136 | 0.236 |                      |        |
| 13:50 | 1.392     | 1.026   | 0.514        | 0.204      |       |       | 0.212                | 0.10   |
| 14:00 | 1.355     | 1.014   | 0.478        | 0.195      | 0.296 | 0.24  |                      |        |

= After first day of installation at North Tower  
What we did -

## TRANSECT I F2 → P6

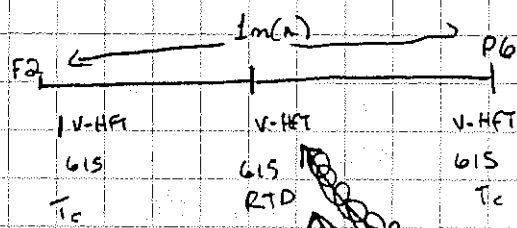

⇒ vertical HFTs ⇒ white dots pointing to F2 (Box not 100% sure)

## TRANSECT II P3 → S2

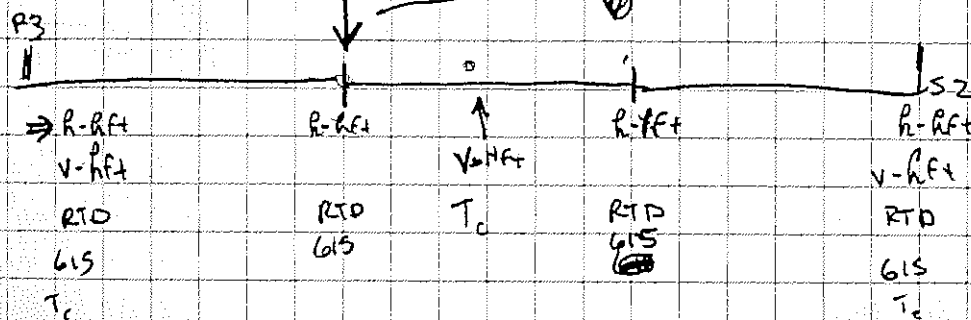

⇒ vertical = white dots towards P3

2 more GIS's  
① near P5 - clearing  
② near P11 - clearing

Use examples

Mux III  $\Rightarrow$  Taking care of Trees: P16, S2, F4, F2

|     | <u>2m</u><br><u>Bore</u> | <u>Bore 0.5m</u> | <u>Bore Base</u> | <u>Soil base</u> | <u>Soil Transect <math>\rightarrow</math> M</u> |
|-----|--------------------------|------------------|------------------|------------------|-------------------------------------------------|
| P16 | ✓                        | ✓                | ✓                | ✓                | 5 (1m, includes M)                              |
| S2  | ✓                        | ✓                | ✓                | ✓                | —                                               |
| F4  | ✓                        | ✓                | ✓                | ✓                | 1 (1m)                                          |
| F2  | ✓                        | ✓                | ✓                | ✓                | —                                               |

3 openings on mux

Mux I  $\Rightarrow$  Taking care Trees: P2, P3, S1

|    | <u>2m(A)</u> | <u>0.5m(B)</u> | <u>Base(B)</u> | <u>Base(soil)</u> | <u>Soil Transect <math>\rightarrow</math> M</u> |
|----|--------------|----------------|----------------|-------------------|-------------------------------------------------|
| P2 | ✓            | ✓              | ✓              | ✓                 | 2 (1m)                                          |
| P3 | ✓            | ✓              | ✓              | ✓                 | —                                               |
| S1 | ✓(2)         | ✓              | ✓              | ✓                 | 2 (1m)                                          |

8 openings on muxMux II

TAKING care of TREES: P5, P6, P11

|     | <u>2m(B)</u> | <u>0.5m(B)</u> | <u>Base(B)</u> | <u>Base(soil)</u> | <u>Soil Transect <math>\rightarrow</math> M</u> |
|-----|--------------|----------------|----------------|-------------------|-------------------------------------------------|
| P5  | ✓            | ✓              | ✓              | ✓                 | 3 (1m)                                          |
| P6  | ✓            | ✓              | ✓              | ✓                 | 1 (1m)                                          |
| P11 | ✓            | ✓              | ✓              | ✓                 | 2 (1m)                                          |

18 openings left

Need at least 10 more  
(still have 8 available)

Needle Temps = Find out how many fine-wire Tc's we have  
(use these first)

Bolts = Have Sap+RM on 2 more trees (P1 + F1)  $\Rightarrow$  4 more Tc's  
(could measure directly on logger as well), Not thru mux!  
Still have 9 channels on Tc logger!!!

Soil Profile = 1-2cm, 5cm, 10cm, 20cm, 50cm (5 Tc's)

## Mux II WIRING

Cable I

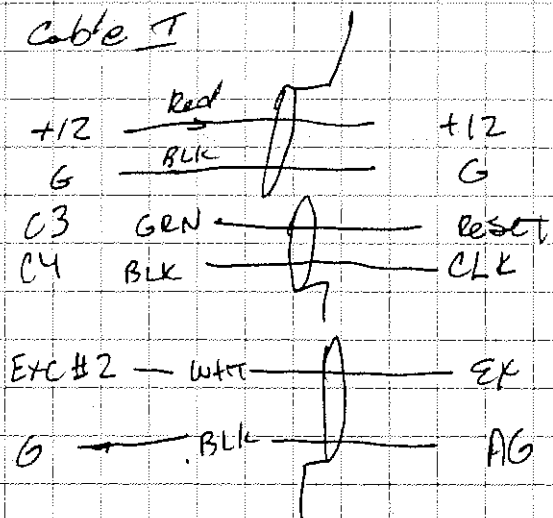

CABLE 2

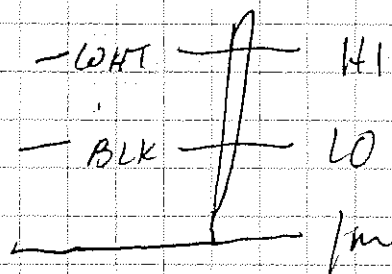

- Heat Flux plates logger  $\Rightarrow$  RUNNING  $\sim$  12:00 PM
- Tc mux logger  $\Rightarrow$  RUNNING  $\sim$  3:00 PM (Mux I & II)
- Mux III not hooked up yet
- ④ ALSO Tc's not in holes except at P1, F1 & S1 (sep + hot)

- New cal stat. AG-1  $\Rightarrow$  ~~1:00~~ - 2:00  $\Rightarrow$  leaks checked

### To do for spr. exp.

- ① ~~Drill hole in Tc Mux III box or make cable~~
- ② ~~Hook up Tc Mux III  $\Rightarrow$  use 16 wire cables? need voltmeter!!~~
- ③ ~~Drill holes in holes  $\Rightarrow$  put hole Tc's in~~
- ④ Start hooking up Tc's in needles
- ⑤ A soil Temp profile ??  $\Rightarrow$  0-50 cm at most! (Do I have Tc's)
- ⑥ Hook up grounds on logger & mux's (use Cu already there!)  
ALSO - connect ground red to AC ground on charger!!  
- grd - Mux II
- ⑦ THINK ABOUT light sensors - shadow band / PAR  
Rnet (Anything else?)
- ⑧ ~~Snow profile sensor (lostaken, Rind)~~
- ⑨ ~~Finally switch Dendrometer wires & Repower 212 to measure Dendrometers (have some more?)~~
- ⑩ ~~Need DBH of TREES~~

10/16 11:20-11:30 New DESSICANT IN profiler // Zeroed + spanned EC system  
 - Turned off FAN IN DUCK  $\Rightarrow$  Later found out turned off ATI sonic  
 11:30-12:00 Downloaded CNR logger  
 $\Rightarrow$  Disconnected shadow band + brought down  
 12:00-1:00 Downloaded Fast 23x DATA logger

$\Rightarrow$  12:20  $\Rightarrow$  Disconnected Pressure sensor tube inside Li-7500

$\Rightarrow$  At sometime  $\Rightarrow$  HANDAR AT 9m had flipped over  
 Brought in + RETIGHTENED pipes  $\Rightarrow$  back out  $\sim$  12:45

$\Rightarrow$  THINGS TO DO for winter

① EC system showed big offset (off the pot.)

$\Rightarrow$  need to change both filters

$\Rightarrow$  TRY TO flush sample + reference cells  
 back w/ high pressure

② Clean optics on Kt lys.

③ new filters on profiler

④ Download new operating system into Li-7500

10/17  $\sim$  11:00  $\Rightarrow$  FIXED PAR sensor (bad connection AT logger)  
 $\Rightarrow$  Downloaded profile logger

$\Rightarrow$  Downloaded Tc23x logger = was ~~logging~~  
 on 10/16  $\Rightarrow$  was logging data every 5 min  
 changed to 15 minutes  
 Downloaded again on 10/17  $\Rightarrow$  loads OK

$\Rightarrow$  Mux III working  $\sim$  12:00  $\Rightarrow$  Reference Temp seem way off  
 ( $\sim$  25-27°C)

Other temps seems OK relative to this  
 TEMPERATURE

$\Rightarrow$  change Tc #15 MUX III / not working for some reason

$\Rightarrow$  Tc's put into bores AT 0 cm, 50 cm + 175 cm  $\Rightarrow$  IN ALL

study trees -

Inserted 3 cm into bores

$\Rightarrow$  Put Tc IN MUX III box  $\Rightarrow$  hooked up the channel 14



0

CAN try to use THIS AS THE REFERENCE Temp.

Need to figure out program  $\Rightarrow$  NOT use the 25T THERMISTOR as reference.

(\*) 10/18  $\Rightarrow$  on campus - figured this out - I THINK

$\Rightarrow$  How many more T's can I measure?

|              |   |
|--------------|---|
| Mux I -      | 4 |
| <u>II</u> -  | 3 |
| <u>III</u> - | 6 |

Tc23x - 8 (DIFF. channels open!)

ON SOIL23x  $\Rightarrow$

SE channel #6

DIFF channels - 4  $\rightarrow$  12

C-parts (?)

#  $\Rightarrow$  how many QUANTUM sensors

- CAN use a 4/6  $\Rightarrow$  channel #  $\Rightarrow$  PAR sensors  
channel 2  $\Rightarrow$  other things (Rebs, IR-T, Parameters?)

- Next is it worth setting up <sup>4/6</sup> multiplexer w/ THERMOCOUPLES IN NEEDLES??!

(\*) count - how many T's I have left!

10/22 Realized fast23x has been running AT 5 Hz SINCE ~Aug. 24 - Right when I changed program to fast23x5.csi to save li-cor diagnostic.

PTI ECU shows that this ADDS ~35 msec to processing time - need to put fast23x4.csi back into data logger on Thursday AM!!

⇒ Also need to update Tc23x w/ new ref. Temp. for  
Mux II

10/25

Tree DBH's

|      | DBH (cm)         | radius (cm) | $r = \frac{DBH}{2}$ |
|------|------------------|-------------|---------------------|
| ✓ P2 | <del>49</del> 50 | 7.96        |                     |
| ✓ F2 | 51               | 8.12        |                     |
| ✓ P3 | 76               | 12.10       |                     |
| ✓ S1 | 76               | 12.10       |                     |
| P5   | 86               | 12.73       |                     |
| P6   | 37               | 5.89        |                     |
| P11  | 38.5             | 6.13        |                     |
| ✓ S2 | 79               | 12.57       |                     |
| ✓ F4 | 18.5             | 2.94        |                     |

used F1 + P1 + P16

11:30 AM - Put new program in Post23x (Post23x4.csi)  
 ⇒ Is now outputting data at 10 Hz  
 ↳ Stoppro/restarted DATA ⇒ looks OK!

10:45 AM New Tc23x program in Tc23x ⇒ uses Tc A5  
 Ref. Temp. ⇒ program works BUT...

- Tmux reference was reading 31°C (obviously wrong)
- using Tc A5 reference ⇒ Tref = -11°C which  
 seems too cold. Panel Temp, Mux I + Mux II  
 ARE ALL BETWEEN -1° → -4°.
- May need new thermocouple (long one)

10/29/01      Testing MPS TEMP PROBES

- Got 3 to work -      2 long ones + 1 short one

2 Td

1:15    PLACED ① = short one      IN ice bath  
          + ③ = long one      (Room Temp ~ 18-20°C)

2:45 - Repackaged in ice - seemed like there were  
          gradients IN THE water!

1/b

3:15 - SWITCHED OUT #1 + #3  
       Put #2 in ice bath  
       => + Note - Laptop time is incorrect - Reads 1 hour behind

11/1/01      Rewired Denonimeters

| <u>Input Channel (GMP00)</u> |        | <u>Deno. #</u> | <u>Tree</u> |
|------------------------------|--------|----------------|-------------|
| 1                            | —————> | 1              | —————       |
| 2                            | —————  | 3              | —————       |
| 3                            | —————  | 2              | —————       |
| 4                            | —————  | 5              | —————       |
| 5                            | —————  | 4              | —————       |
| 6                            | —————  | 7              | —————       |
| 7                            | —————  | 6              | —————       |
| 8                            | —————  | 9              | —————       |
| 9                            | —————  | 8              | —————       |
| 10                           | —————  | 10             | —————       |

4  
22  
36  
3  
22  
16  
5

11/8/01

Hooked up MRS TEMP. PROBES

| # | #Therm. | Location      | Tc # AT Ground   |                       |
|---|---------|---------------|------------------|-----------------------|
| 1 | 11      | 2.1 m from S2 | #9 → grad. level | need<br>to<br>recheck |
| 2 | 21      | 1 m from S2   | #18 →            |                       |
| 3 | 21      | 34 cm from S2 | #19 →            |                       |

Running about 3:00

⊛ Note DATA logger time may be off - need to check that.

11/9/01

Downloaded - 23xa  
 - Tc23x  
 - Denor. 21x  
 - MRS10

Notes: ① 23xa ⇒ looked fine -

Reset Time to Standard Time

② Tc23x ⇒ Mux III still looks screwed -

ReTemp was  $-11^{\circ}$  (Don't Believe)⇒ Rewired Tc\_45 (from Mux II) to be  
REFERENCE IN Mux III - looked  
like it was working

③ Added Tc's #20 → 25 to Mux II

~~④ 45 → 50 Tc~~ Tc\_45 → Tc\_50

④ Also Reset to Standard Time

⑤ Denominator - looked OK ⇒ Time was 1 hr too early  
 - Reset to standard time  
 - Put new program in ⇒ only does denominator  
 Denoro.csi

⑥ MRS Temp probes still running OK, but  
 forgot to set data logger time ⇒ way screwed  
 up time tags.  
 Reset to std. time.



11/28/01 At site

- New  $\phi$  AIR  $\Rightarrow$  ~ 10:30 AM
- Turned off Fan in Duck ~ 11:00

Started lots of Trouble

- ① DATA LOOKED REAL SCREWY
  - ② THEN ALL DATA WENT DEAD
  - ③ Power was OK; looked like data was coming in
  - ④ SHUTDOWN DUCK & restarted - No good
  - ⑤ Finally lost contact w/ Duck
- $\Rightarrow$  Realized what was going on - Hard drive was freezing up - everytime I breathed on it  $\Rightarrow$  got worse
- turned Duck off
- $\Rightarrow$  Put new desiccant in around hard drive, turned off fan & used heat gun to warm up hard drive - THEN turned on & closed up box - when got (~15 min.) back to TRAILER - everything was working fine! (see if it makes it thru night)

- Check tension in guys - only 2 were slightly loose (~550 lbs) re-tightened to 600 lbs

- Need to:
- ① Change filters on EC & profiler DID some of these
  - ② Clean Kr hygrometer  $\rightarrow$  2 more
  - ③ switch out EC IRGAs
  - ✓ ④ ~~Bring FCO back to TRAILER TO WORK ON~~
  - ⑤ ~~Try light test on 7500~~
  - ⑥ ~~New desiccant in profiler~~
  - ⑦ Back to snow melt setup  $\Rightarrow$  needle temps
  - ✓ ⑧ ~~Download loggers (after Nov. 30)~~

UP ON Dec. 7

need to:

① SET UP EC system UNDER canopy! (AT 1.5-2m)

① CSAT-3 SONIC (1 or 3m sonic)

② MOVE ATI TO REPLACE THAT SONIC.

③ USE UNUSED LI7500 (good for H<sub>2</sub>O)

② Bring DOWN Kipp & Zonen Radiometer (Hook TO SOL23x) => THINK I have enough free channels

③ IR Thermometer (which data logger)

④ Few more needle temps -

~~⑤ DOWNLOAD loggers~~

~~⑥ HAND OUT THE 7500~~

✓ ⑦ TAKE 7500 => a) work on Press. inlet  
b) FLIP UPSIDE DOWN & see if light leak is better

Programming -

need to HAVE ON text file THAT ALL my FLUXCALCS.csh programs feed into to get input & output file names  
=> THEN can just edit this & not have to recompile functions

12/26/01 11:00 - Reset LI7500

- changed P-inlet; put 1/8" TEFLON EXTENSION & cable-tied to top of box

- flipped sensor orientation => NOW POINTS DOWN

-> Downloaded loggers (soil, T<sub>c</sub>, dendro + MRTEMP.)

DATA looks OK

-> Replaced 2um FILTER in profiler

-> Replaced 5m inlet filter on profiler

SOIL 23x

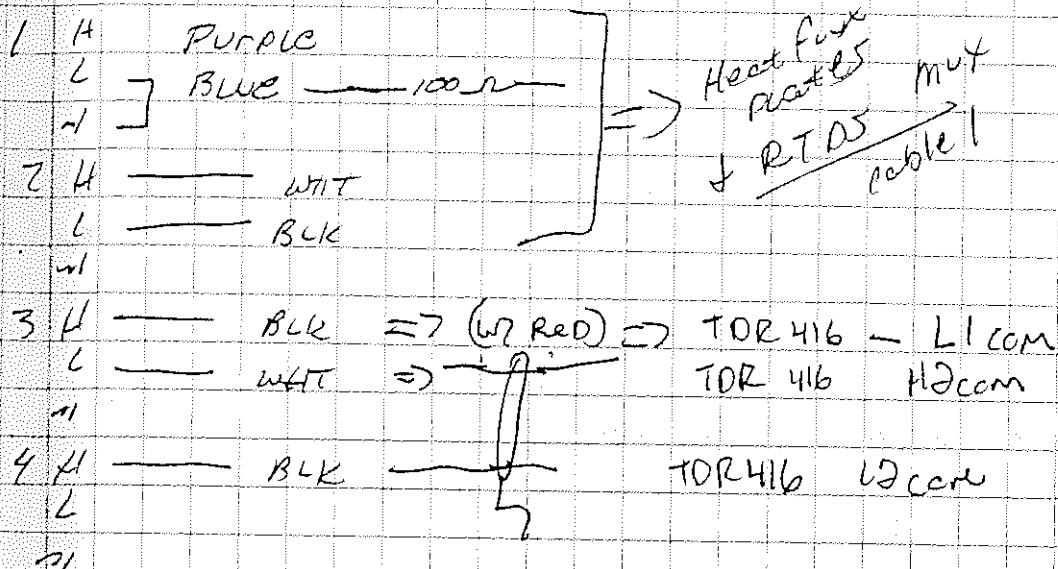

12V — Grn — TRR 416  
G — Blue — 12V/Gnd

Exc 1 — BLK → HGT mux — Cable 2  
Exc 2 — Grn → GND → HGT mux — Cable 2

12V — Red → HGT mux — Cable 2

GND — BLK → HGT mux — Cable 2

C1 — White → HGT mux — Cable 2

C2 — Grn — RES (TOR 416)  
C3 — BLK — CLK (TOR 416)

C4 — Red — H1 com

C5

C6

ALL THE  
TRRS

12V Red — TOR — See manual  
||  
Wired straight  
out of there!

Tc23x

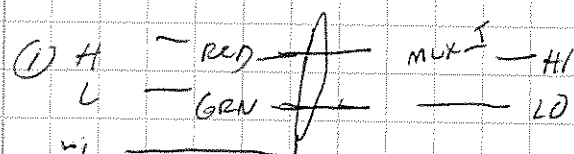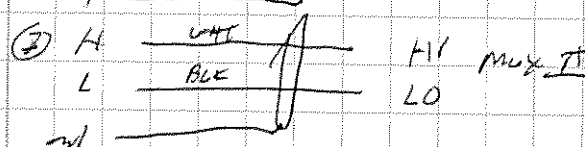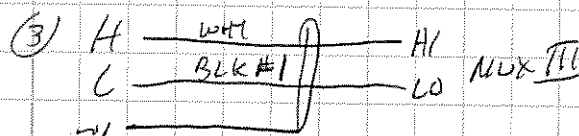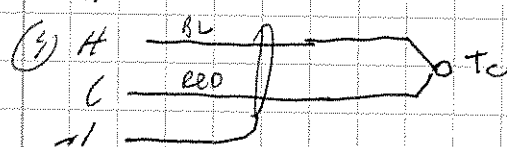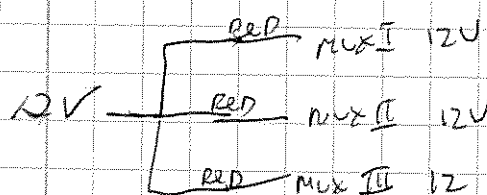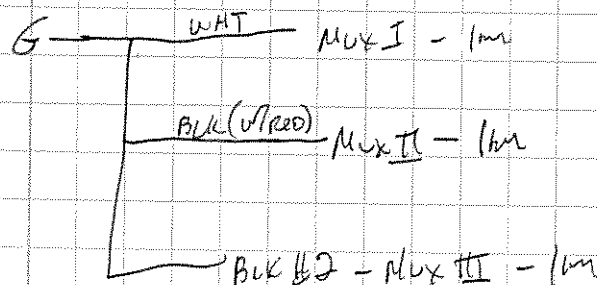

C1 — BLUE — MUX I — RESET

C2 — WHT — MUX I — CLK

C3 — GRN — MUX II — RES

C4 — BLK — MUX II — CLK

C5 — BLUE — MUX III — RES

C6 — BLK #3 — MUX III — CLK

EXC1 — PULS GEN — MUX I — EXC

EX2 — WHT — MUX II — EXC

EX3 — GRN — MUX III — EXC

w/ — BLK #4 — MUX III

w/

w/ — BLK — MUX I shield

BLK  
TO GND  
/

1/15/01 SONIC (CSAT) had gone down on SUNDAY, JAN 13  
ALONG w/ Li7500 => logger looks OK - looks like  
SDM screw-up.

- ① => 10:30 - Reset Li7500 => everything started responding
- ② DOWNLOADED CNR logger (~10:30-11:00) => changed to MST
- ③ New filter of EC system (~11:00)
- ④ Li7500 REALIGNMENT - now horizontal
- ⑤ Tightened up Heron's boom (about to fall off)



CNR 231

Exc 1 - RED } PT 100 - CNR-1  
-A - BLK }

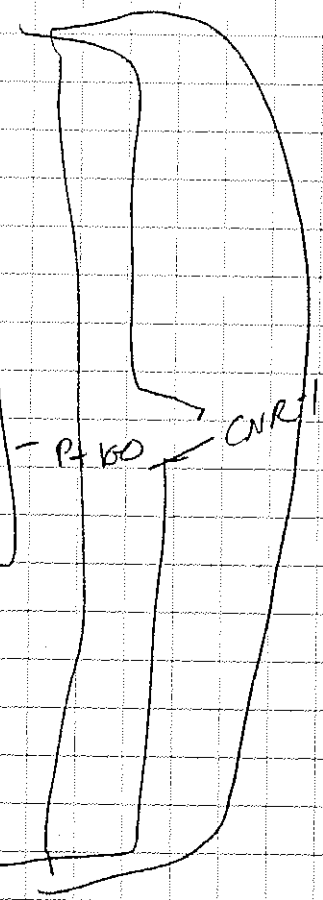

- 1 H RED
- L BLUE
- M
- 2 H WHT
- L BLK
- M
- 3 H BLUE
- L GRN
- M GRN
- 4 H YEL
- L DK GRN
- M
- 5 H GRAY
- L YELL
- M
- 6 H BRN
- L GRN
- M
- 7 H GRN
- L BLUE
- M
- 8 H GRN
- L BLUE
- M
- 9 H
- L
- M
- 10 H
- L
- M
- 11 H RED
- L BLK
- M SHIEL
- 12 H GRN
- L BLK
- M SHIELD

} PAR

} PAR

} REBS #1

} REBS #2 => DISCON.

1 H RED  
1 BLK  
SHI  
2 GRN  
BLK  
SHIEL

CG-2

3 WHIT  
BLK  
SHIEL

4 RED  
BLK  
SHIELD

H2O

5 CLEAR  
BLK  
SHIELD

IKC

6 GRN  
BLK  
SHIEL

EC  
FLOW

7 WHIT  
BLK  
SHIELD

Nothing

8 RED  
BLK  
SHIEL

seclcd

9 WHIT  
BLK  
SHIEL

Flow

11 WHIT  
BLK  
SHI

12 RED  
BLK  
SHIELD

UNKNOWN  
L: 7500  
ANALOG

12U → CSAT-3 (Red)

G → BLK, CLR (CSAT-3)

G → BLK CLR

C1 GRN (CSAT) Red (7500)

C2 WHIT (CSAT) BLK (7500)

C3 BRN (CSAT) GRN (7500)

C4  
G - WHIT  
SHIEL → 7500

# PLAN for DATA LOGGERS

- ① Replace Twesnic ~~10~~ 23x w/ 21x  
 WILL RUN = 1 CSAT-3 + 1 HANDAR (2 channels)  
 CH. outputs 7 values #2, #3  
 $u, v, w, T, \text{diag}, U_{\text{hand}}, U_{\text{dir}}(\text{hand})$
- ② Take 23x  $\Rightarrow$  move to north tower  
 - Take Peter Blanken cable & short haul modem  
 - Hook up new channel w/ fast data - CSAT-3 + Li7500  
 (maybe CNR-1 eventually)  
 8 outputs:  $u, v, w, T, \text{diag}, \text{CO}_2, \text{H}_2\text{O}, \text{press.}$   
 [Note  $\Rightarrow$  could run w/ Ed Swiatek's program for 15 min. averages]  
 $\Rightarrow$  need to hook up & configure Li7500 (power cable)

1/28/02 - Profiter left 10:50 AM for downloading  
 - Manual zero/span of profiler -  
 $C_{\text{span}} = 437.5$

$$P_{\text{sampling}} = V = 0.138 \rightarrow 0.121$$

4.6666

ECORING  $P = 0.130 = 60.950 \text{ kPa}$

$$V_{\text{meas}} = 38 \mu\text{V} \quad V_{\text{set}} = 6.000$$

SPAN:  $P = 0.1307 \times 61.057$   $P/P_0 = 0.6027$   $[CO_2] = 437.5 \text{ ppm}$   
 $T = 12.00$   $T/T_0 = 0.92297$   
 $V_{\text{calc}} =$

$$CO_2 \frac{T_0}{T} \Rightarrow 2355 \text{ mV} \Rightarrow V \frac{P_0}{P}$$

$$V_{\text{calc}} = 1419$$

$$V_{\text{meas}} = 1369$$

$\downarrow$   
 Set to 1419

BACK ON-LINE AT 11:03

# NEW 7500

DAC #1  $\text{CO}_2 \text{ mmol m}^{-3}$  0-5V  $\Rightarrow$  0  $\rightarrow$  20  $\text{mmol m}^{-3}$   
 DAC #2  $\text{H}_2\text{O mmol m}^{-3}$  0-5V  $\Rightarrow$  0  $\rightarrow$  300  $\text{mmol m}^{-3}$

should change this scale to something larger

Updated the software on laptop -  
 Zeroed + spanned  $\Rightarrow$  looks OK  $\Rightarrow$  will use DAC outputs

## 7500 DIMENSIONS

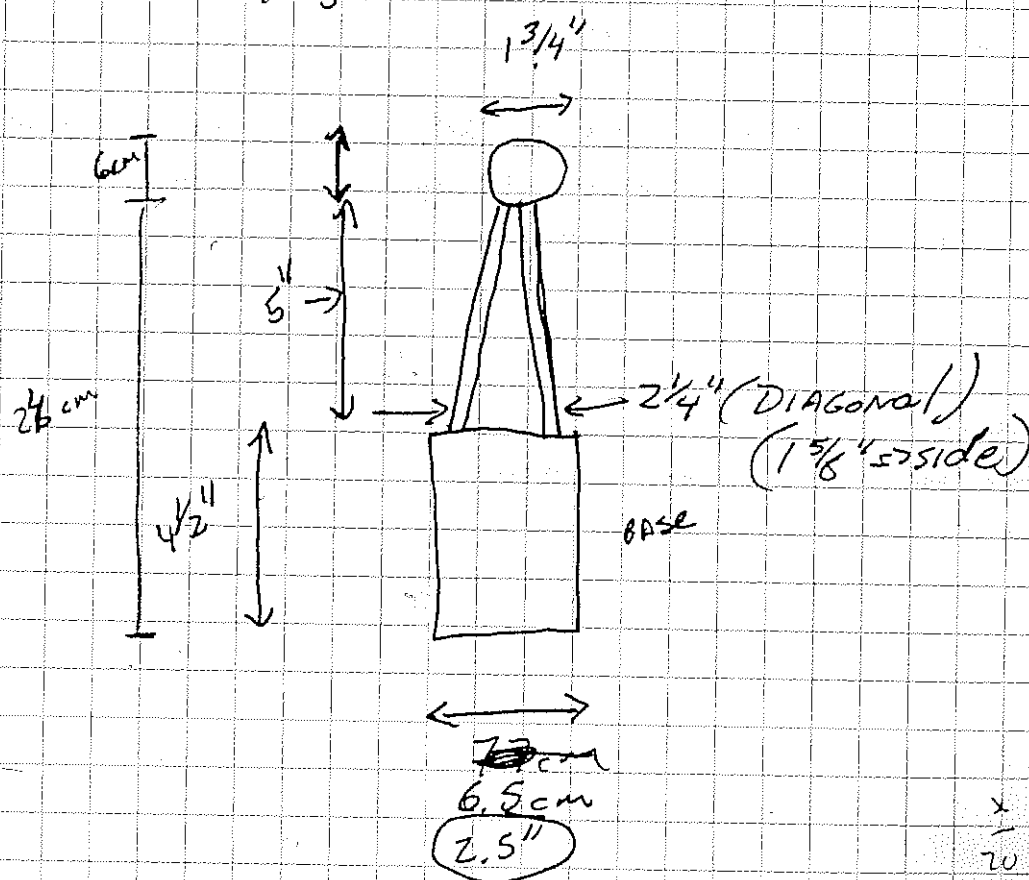

should be 5V  $\Rightarrow$

$$\frac{x}{20} = \frac{y}{5000} = 0$$

1/29/02

Downloaded 23xa, 23xtc, MR5temp

(\*) Doesn't look like MR5temp is dumping data to the Pencil card?

$\Rightarrow$  Rechecked program  $\Rightarrow$  Is a statement to do this MAYBE THE card was full??

$\Rightarrow$  Disconnected CSAT-3 at 3 m

changed prep. config etc.  $\Rightarrow$  got rid of this sonic

$\Rightarrow$  Mounted sonic ON TRIANG. section of North tower.

Along w/ L7500



To finish hooking up we need:

- ① Power Junction - Need 12V for
  - a) logger
  - b) CSAT-3
  - c) Li7500

Possibly make a big junction at battery  $\rightarrow$  Too many THINGS hooked to battery now anyway!

- ② Get ~~20~~ short haul cable from P. Blenkins tripool & run to North tower.  $\Rightarrow$  hook up to surge protector

!! ③ 8-pin - 9-pin connector logger  $\rightarrow$  SC932 translator

- ④ hook up wire connection

(\*) Note - test to see if we could measure Pressure voltage somewhere

- ⑤ Laptop w/ program to dump!

McGuck's

✓ Terminal strip

✓ hole saw  $\Rightarrow$  just under 2" diameter

1/31/02 NOT AT SITE:

Designing L:7500 Beehive

New plate  
Plate at 2.5-3.0cm  
- 6-6.5cm  
- 14.2-14.7cm

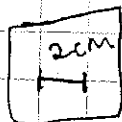

TOP Plate:  $\alpha = \tan^{-1} \frac{6}{13.7}$   
 $\alpha = 17.8^\circ$

Let's try  
 $d_1 = P1 - P2 = 6cm$   
 $d_2 = P2 - P3 = 5cm$   
 $d_3 = P3 - P4 = 3cm$   
  
same as below  
 $d_1 = 21.3^\circ$   
 $d_2 = 37.9^\circ$   
  
 $d_3 = 32.6^\circ$   
 $d_4 = 51.9^\circ$   
  
 $d_3 = 3.5$   
 $d_4 = 35.5$   
 $d_5 = 55^\circ$

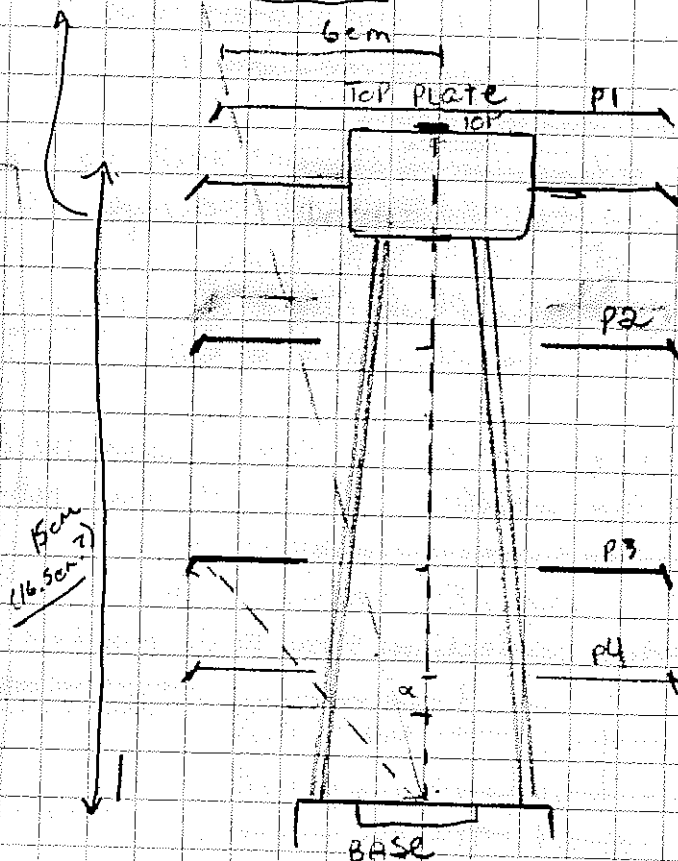

= IF use ONE LOT smaller hole  $\rightarrow$  DISTANCE = 16.5cm

16.7cm

$\Rightarrow$  HOLES ARE BIG ENOUGH

EACH PLATE = width = 3cm  
( $\leftarrow$  P2  $\rightarrow$ ) 5cm down from top:

$\alpha_i = \tan^{-1} \left( \frac{3}{13.7} \right)$   
 $\alpha_i = 12.4^\circ$

$\alpha_o = \tan^{-1} \left( \frac{6}{13.7} \right)$   
 $\alpha_o = 23.7^\circ$

move P2 Down 1 more cm

$\alpha_i = \tan^{-1} \left( \frac{3}{12.7} \right)$

How far down P2 to get  $\alpha_i = 16^\circ$   
 $\tan(16^\circ) = \frac{3}{x}$   $x = 10cm$

P3  $\rightarrow$  Another 6cm down  
 $\alpha_i = \tan^{-1} \left( \frac{3}{6.7} \right) = 24^\circ$

$\alpha_o = \tan^{-1} \left( \frac{6}{6.7} \right) = 41.8^\circ$

To get  $\alpha_o = 60^\circ$   
Need  $x = 3.46cm$

2/5/02

10:30AM  $\Rightarrow$  Disconnected & Took down CNR-1  
 Released REBs (east-west)  $\Rightarrow$  need  
 Turn Buckle to 20 N/s  
 $\Rightarrow$  was quite a bit off

Craig:

- Downloaded, ~~ALL~~ LOGGERS
  - Hooked up Fast2k (power, etc.)
- Seems to be working AT DATA Logger end!!

$\Rightarrow$  got long "Blank" cable  
 Has 2 places that were eaten  $\Rightarrow$  need to fix  
 $\leftarrow$  (ALL THAT'S left to hook up under canopy EC system)  
 $\langle$  Hooked to channel 206 in DUCK  $\rangle$

(\*) Note: Hooked up 2<sup>nd</sup> Battery to RUN  
 Fast2k, CSAT-3 & Li7500 } Looks like it  
 runs better // Voltage  
 more constant

~~Long cable~~ CABLE connecting shore level modems

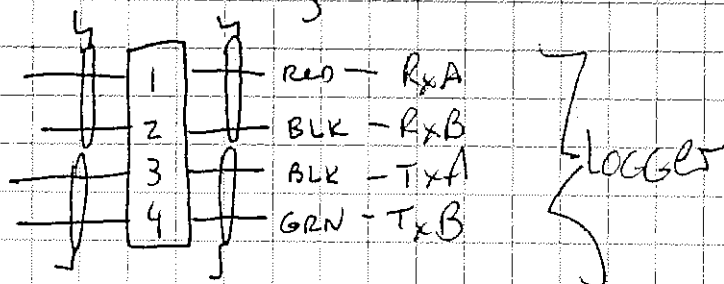

2/7/02  $\Rightarrow$  Found bad cable on UC EC system  
 should be ready to go once hooked up!  $\Rightarrow$  made new cable

2/12/02 - New cable on UC EC system - still not working  
 checked - cable  $\rightarrow$  surge protector  
 switched out SC932 box

- Put Li7500  $\Rightarrow$  straight up orientation ( $\sim$  1:30 PM)  
 - Levelled AT1 SONIC  $\Rightarrow$  OFF 10:30 - 2:30  
 used level  $\Rightarrow$  electronic level appears to be  
 screwy (tx is dead  
 tx is reading 0.24 V when level)

2 1/8"

- ⊛ Note - Recheck wiring on UCEC surge protector  
otherwise - check short haul modems at either end

List of some things to do => for field stuff

- In lab:
- ① Add ~~ENR-1~~ to ~~fast23~~ program = ~~need new fast23 program~~ ~~AT TRAILER~~
  - ② ~~new Dessicant traps~~
  - ③ ~~new connectors // 9 pin + 25 pin~~  
Need to buy connectors
  - ④ ~~test other tilt meter // needs a cable~~
  - ⑤ ~~Modify fast23 for Hi/Low Res~~ (9 pin - 9 pin)
- ⇒ New spec AT TRAILER to be made

- AT trailer:
- ① Put new pump in TECO (wait for new one to arrive)
  - ② Rebs radiometer - New device  
- ~~new connector~~ (look at wiring in office)  
- ~~new desiccant~~

⊛ => should we just replace existing one?

- ③ ~~calibrate new standard~~
  - ④ Figure out Blanken IRT
  - ⑤ ~~Make new light shield for Li7500 on tower~~
- ~~At tower~~ ① new spec

- AT Tower:
- ① New operating system in Li7500
  - ② New fast23 program // High + low Res. data fast23x6.15
  - ③ Clean kr hyg. optics
  - ④ ~~Test components of UCEC system~~  
= short haul modems at either end  
= wiring  
= cable (again?)  
⊛ check output commands for ~~TECO~~
  - ⑤ Recheck level of ATL sonic (new tiltmeter?)
  - ⑥ Switch out 6262 for 6251 in EC system
  - ⑦ Radiometer mount (Craig??)  
↳ IRT mount(?)



2/15/02 New Duane - cal standard  
 $C_{CO_2} = 345.7 \text{ ppm}$

(\*) Note  
 check Rebs  
 Manual - wiring  
 on D7.1

| Run | ZERO  | SPAN  |     | V <sub>cell</sub> | SAMPLE |     |      | $C_{CO_2} \text{ ppm}$ |
|-----|-------|-------|-----|-------------------|--------|-----|------|------------------------|
|     |       | T     | P   |                   | T      | P   | V    |                        |
| 1   | 0     | 16.45 | 789 | 1398 (set)        | 16.60  | 786 | 1476 | 372.112                |
| 2   | 0     | 17.00 | 788 | 1396              | 17.14  | 787 | 1478 | 373.59                 |
| 3   | 0     | 17.55 | 788 | 1393              | 17.82  | 787 | 1483 | 376.87                 |
| 4   | 0     | 18.35 | 788 | 1391 (*)          | 18.47  | 787 | 1470 | 372.57                 |
| 5   | 0     | 18.66 | 788 | 1389              | 18.84  | 787 | 1472 | 373.73                 |
| 6   | Break |       |     |                   |        |     |      |                        |
| 6   | 0     | 21.9  | 787 | 1378 (*)          | 22.00  | 786 | 1458 | 373.06                 |
| 7   | 0     | 22.40 | 787 | 1376              | 22.52  | 785 | 1457 | 373.48                 |

Electronic level #2 -

$\pm x \text{ offset} = +0.047 \text{ V}$   
 $\pm y \text{ offset} = -0.05 \text{ V}$

373.09  
 $\pm 0.64 \text{ ppm}$   
 (1σ)

From 11-2:00 Undercanopy logger running intermittently  
 TEST KC-EC connections

Found - BAO short haul modem AT DUE !!  
 Everything up & running ~ 2:00 PM !!

Now need RADIOMETERS !!

(\*) substantial span shift  
 (\*) (\*) even bigger span shift ??

### Programs

Fast23x6 - csi  $\Rightarrow$  1 high res. output (CO<sub>2</sub>.ec) dial #7  
 TC23x - csi  $\Rightarrow$  Added code for CNR-1  
 SW in/out - channel 6 & 7  
 P+100 - channel 7 & 8 & 9  
 LW in/out - channels 6 & 7 & 11

THINK ABOUT  
 switching w/  
 heater ??

KNF pump in Seccol = UN815 KN1

I ordered UN828 KN1

New Light Shield

New List of stuff

- In Lab:
- ① Check Rebs wiring on 0.7.1 [LCD=4) BULK=5) (OE) ✓
  - ② Start looking into programming - move DEMONSTRATORS to  
9 SOIL 23x.csi
  - ③ Contact John Franks about Seccol electronics

- At trailer:
- ① Redo Seccol pump box w/ new pump
  - ② Put old Seccol pump in TECO (test)
  - ③ Start trying to rewire Seccol op amp
  - ④ Heat shrink Rebs connector
  - ⑤ Figure out Blanken IRT

- At Tower:
- ① New Li7500 operating system
  - ② Light shield on Li7500 (Both)
  - ③ Fast 23x6 program in logger → Hi + Lo Res. DATA
  - ④ Switch out Rebs radiometers - relevel (hook up cables)
  - ⑤ New tiltmeter on AT1
  - ⑥ Clean K hyg. optics
  - ⑦ Switch out 6251 for Fast 6262

- Spew stuff:
- ① Mount + hook up CNR-1 radiometer
  - ② more needle temps

- Code to write:
- ① Undercavity fluxes
  - ② Something to look at soil temps

# New light shield for Li7500

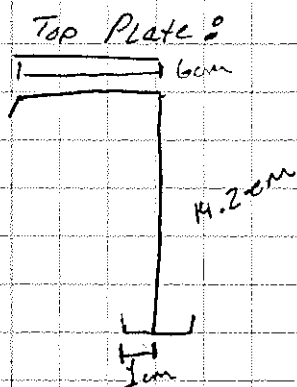

From center  $\alpha = \tan^{-1} \frac{6}{14.2} = 22.9^\circ$   
 outside  $\alpha = \tan^{-1} \left( \frac{5}{14.2} \right) = 19.4^\circ$

## 2nd plate

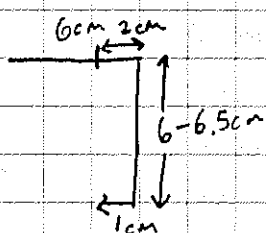

From center:  $\alpha_i = \tan^{-1} \frac{2}{(6-6.5)} = 17.1-18.4^\circ$

$\alpha_o = \tan^{-1} \frac{6}{(6-6.5)} = 42.7-45^\circ$

From outside:  $\alpha_i = \tan^{-1} \frac{1}{(6-6.5)} = 8.7-9.4^\circ$

$\alpha_o = \tan^{-1} \frac{5}{(6-6.5)} \Rightarrow 35.8-37.6^\circ$

## 3rd plate

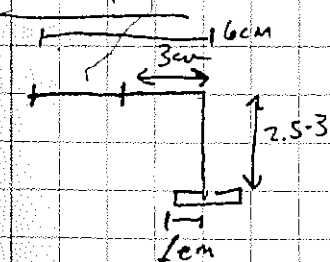

From center:  $\alpha_i = \frac{3}{(2.5-3)} = 45-50^\circ$

$\alpha_o = \frac{6}{(2.5-3)} = 63.4-67.4^\circ$

From outside

$\alpha_i = \tan^{-1} \frac{2}{2.5-3} \Rightarrow 33.7-38.7^\circ$

$\alpha_o = \tan^{-1} \frac{5}{(2.5-3)} \Rightarrow 59-63.4^\circ$

From center: TOP - 0-22°

MID - 18-45°

BOTTOM - (45-50)  $\rightarrow$  (63-67°)

< possible gap?

side: TOP - 0-19°

MID - (8.7-9.4)  $\Rightarrow$  (37.6-39.8°)

BOTTOM - (33.7-38.7)  $\Rightarrow$  (59-63.4°)

< possible gap?

3/5/02 AT site

- ⇒ Added CNR-1 to E23x ⇒ ~ 12:00 PM
- ⇒ will need new cal. std. next week

Hooked up IR Thermometer to Soil23x logger - but  
Not logging data (next week!)  
DOWNLOADED soil loggers

- ⇒ Tested new Li7500 light shield - will probably work ABOVE canopy!

~~⇒ March 8~~

3/8/02 Not AT site

Appears pressure sensor on IRGA has gone bad - reading  
-6999's

3/11/02 ⇒ 3/9/02 1:41 AM (not at site)

Duck crashed (not sure why)

looks like it came back on about 4 hrs later  
BUT NO DATA!

- ⇒ Appears that Musster & Quacker are trying to  
take data ⇒ NO channels ARE ACTIVE?

Likely possibilities:

- ① No Power supply or popped breaker  
going to that supply (cuts off short haul  
modules if nothing else)
- ② Serial Input card (Hope not)

Need to go up tomorrow

3/12/02

Breaker had popped - however Power supply to  
SERIAL BOARDS was FLAKY TOO.

⇒ REFLIPPED Breaker

⇒ SHUT DOWN DUCK

⇒ TURNED Ser. BOARD switch on/off ⇒ VOLTAGE  
came back up to ~10V (was at 3V)

⇒ TURNED ON DUCK & data started flowing!  
~ 11:00 AM



sensor orientation  $310^\circ - 312^\circ \Rightarrow$  mag. N  
2.35m ABOVE ground.

- $\Rightarrow$  Reloaded program into Undercanopy logger
- $\Rightarrow$  added IR-7 to SOIL23X (~11:30AM) + downloaded
- $\Rightarrow$  Downloaded other loggers

couldn't find data for Tc Between 2/5 + 2/26  
+ since we added CNR  $\Rightarrow$  data was erased on  
DATA logger.

Also lost some data last week  $\Rightarrow$  Seibold said power  
was out at MRS ALL week-end

$\rightarrow$  NOTED PROFILO pump was dead // will have to check  
data to find out how long it has been dead.  
Replaced pump & RUNNING ~ 3:30 PM

$\rightarrow$  Also put new pump in T&CO  $\Rightarrow$  seems to be  
working fine now

laughter - Mauser

3/18/02  $\rightarrow$  Replaced EL IRGA w/ 6251  
 $\rightarrow$  IRGA off 11:30  $\rightarrow$  12:00  $\Rightarrow$  NO water channel

3/27/02 = ~10-10:30 cleaned Ir hyg. optics  
Voltage went from 40mV  $\rightarrow$  nearly 4 volts!!  
- Reset Li7500; THEN put in new operating system  
- Put Light shield over sensor (& cable tied on!)  
(~11:00-11:30)  
- New ZERO gas (~10:30)  
OLD CYLINDER was dead

AFTER lunch -

Downloaded SOIL23XA  $\Rightarrow$  Appeared to only have data  
up until Julian day 78 (March 19th)  
TODAY is: Julian day 86

Lacks like we missed 8 days of data on this logger  
- Don't know why logger wasn't keeping data - had funny  
message on screen when I opened the box  $\Rightarrow$  should have  
been in power-saving mode.

312  
-12  
300

- IT was somehow in some funky standby mode
- Re-sent program after collecting data - then downloaded 45 min later  $\Rightarrow$  DATA was being sent To Final Storage.

$\Rightarrow$  Downloaded 23met + 23xprof loggers on the tower.

4/2/02

1. Tower was in convergence zone - storm front pushed up just to our tower  $\Rightarrow$  moved back further (watched from 10:30-11:30AM)
  2. Turned TECO back on (~11:00AM)
  3. ~~Too~~ Moved 6m Handler down to 2m  
Moved 1m PSAT to 2m  
Handler off  $\Rightarrow$  11:30  $\rightarrow$  2:30 (oriented to mag. N)
- > changed CSAT off  $\Rightarrow$  1  $\rightarrow$  2:00  
4. Check MRS temp logger  $\Rightarrow$  Had to reload program THEN seemed OK
5. Downloaded CNR logger
  6. Took down 26m propvane (~3:00PM)
  7. Light shield on 7500 was partly off  $\Rightarrow$  pushed it back on.
- > Realized that EC pressure sensor was reading off-scale  $\Rightarrow$  was reading -1100 mV ( $\pm 1000$  mV scale)  
changed inlet filter (no change)  
changed filter in box  $\Rightarrow$  big change, flow went up + pressure went to normal value (-500 mV)

### THINGS TO DO

- (1) Need Natgene bottle for Profile inlet covers  $\Rightarrow$  need filter & cover on 2.5m inlet, cover on 10m inlet
- (2) Test Hi Resolution data (early)
- (3) Switch out & Re-level Rees radiometer
- (4) ~~Relevel~~ both sonics
- (5) Epoxy light shield on 7500
- (6) Epoxy 21.5m RH/T sensor ventilator
- (7) ~~Reconnect wire to date~~ Dock
- (8) Hack up Seclode

McGuck's  
small wire nuts  
cable ties  
M. (#25)  
(#45)

4/5/02 -

- ① DOWNLOADED Forest loggers  
Soil23x  $\Rightarrow$  had not been apply calibration to heat flux plates (program screw-up)  
Put in new program - looks OK
- ② ~~Soil~~ Battery running loggers is screwed - switched - everything AT North access tower running on the 2<sup>ND</sup> battery  $\Rightarrow$  everything seems OK // rechecked all loggers
- ③ Put wire nut on DUCK bad wire  
No data loss
- ④ Put 16m vane back up - is working - really tightened  
Nut on propeller  $\Rightarrow$  hopefully won't come off  
 $\Rightarrow$  If came loose - propeller could turn w/out turning shaft  $\Rightarrow$  lose signal
- ⑤ New filter on 21.5m inlet
- ⑥ Re-leveled AT, sonic (messing w/ filter screwed it up)
- ⑦ Pulled in 7500 - TRIED TO EPOXY light shield on  
(may not work - epoxy was too cold & gooey)  
kind of made a mess
- ⑧ Took down 26m propane - has not worked in a while.

= cleaned up trailer a bit.

4/8/02 At site

$\Rightarrow$  connection battery charger went off

BATTERY running - MRstemp; Tc23x, soil23x  
& 21x sonic died

Reconnected & reloaded programs  
(minimize ~~data~~ data loss)

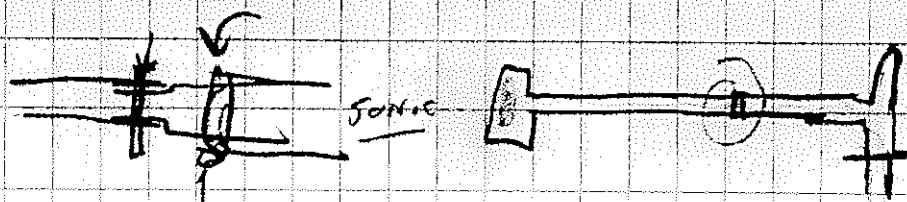

## To Do

### At Tower

- ① Put up new ~~sonic~~ AT 11.5m
- ② Switch out Rebs radiometer
- ③ Test hi. resolution data
- ④ New cover for 10m profile inlet
- ⑤ ~~check 1.7500 light shield~~
- ⑥ Epoxy ventilator shafts (for RH/T sensors)
- ⑦ Switch out tilt sensor on AT1
- ⑧ ~~keep check on soil forest loggers~~
- ⑨ Mount & hook up shadow band

→ Get 6262 back & switch it back in  
 → Try to connect directly to ~~UC~~ sonic  
 (check cables etc.)  
 Check power in Box

### Sealed

- ① Test S/N vs. flow rate
- ② Get ~~box~~ for pump (Tool box perhaps)  
 (put pump in box)
- ③ Take it up & start running.

// need some ventilation  
 PVC Bulkhead  
 [put together AT TRAILER]

### DATA Analysis

- ① ~~dirtying~~ → put in cal. func. for March
  - ② get March data All fixed up & plotted
- data for constance?

### [03]

- ① Bring up Birks detector // why is analog output so flaky
- ② TEST // Switch INeed TUBING

analog output → maybe datalogger

### Programming

- ① undercavity EC
- ② Sealed O<sub>3</sub> Furnes

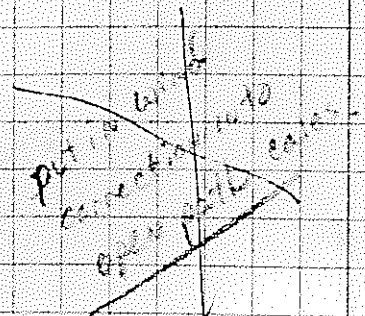



4/18/02

SWITCHED BACK TO IR638 (10:45-11:45)

- TC 23x  $\Rightarrow$  wrong time on logger

logger  
4/16 9:07

Real Time  
4/18 11:47

$\Rightarrow$  Reset clock &  
Downloaded

- Soil 23x

logger

Wrong  
38:55

Real Time

$\Rightarrow$  was on standard time  $\Rightarrow$  Reset to MDT

- Denoram  $\Rightarrow$  was on standard time, otherwise OK  
Reset to MDT

- Fixed under canopy, sonic  $\Rightarrow$  criffer had chomped the wires

$\Rightarrow$  Mounted Seccol + hooked up -

- Recheck wiring to glate logger (relays etc.)
- Need to wire up & hook up pump
- Change Fast 23x program for Seccol

$\Rightarrow$  RMY 26  $\Rightarrow$  ON AT 21.5 m  $\sim$  3:00 PM

$\hookrightarrow$  (New Vane)

Reset RMY AT 16 m (really at 14.9 m)

$\hookrightarrow$  for some reason wind speed was giving zeroes  
cycled power & it started working

4/19/02 ON campus

New version of Fast 23x6.csi

$\Rightarrow$  ready for Seccol  $\Rightarrow$  signal - channel 7

Flow - channel 8

Empty - channel 9

Use Control part 7

(\*) need to figure out what signals are from where!!

4/27/02

Bill hooked up Birk's O<sub>3</sub> sensor next to TELCO  
(Bottom of tower)

Using analog signal  $\Rightarrow$  to Profiler 23x

DIFF channel #5  $\Rightarrow$  currently listed as anal5 in  
prep config

Loaded fast23x6.csi into fast23x

Sealed cal's Not working - Sealed is hooked up & ready  
to go ONCE cal's are working (pump & everything)

Running around 2:30 PM

(\*) (\*) Need to check further - After hooking up  
saw lots of Noise on other profiler channels  
- (??) -

Especially the leaf wetness sensor (A single-ended  
measurement!)

$\Rightarrow$  could be a ground screw-up

Birk's instrument is not really grounded in  
any way & BNC ADAPTER connects to chassis

$\Rightarrow$  try either  $\Rightarrow$  (1) grounding Birk's instrument

(2) removing BNC ADAPTER from chassis  
or bypassing BNC ALTOGETHER.

$\Rightarrow$  Be sure to check & see if data looks screwed up!!

Current Dev. settings

DevPro.csi

21x

10x

Port 4  $\rightarrow$  Res  $\rightarrow$  Port #1

Ex #3  $\rightarrow$  CLK  $\rightarrow$  Port 2

DIFF CHANNEL #6

1 -42  
2 -117  
3 -8  
4 -97  
5 -6.8  
6 -127  
7 -45  
8 -156  
-42

10 - -415

- 4/30/02
- (1) Fast O<sub>2</sub> & farked around for a while  
=> started running w/ right did Names  
around 2:00 PM En 9 hpm
  - (2) Grounded BIRKS O<sub>2</sub> sensor & funny noise  
on datalogger ceased (~2:00)
  - (3) 2:30 => Reset voltage scale on undercanopy  
L: 7500 => Now 5V = 600 mmol m<sup>-3</sup>  
for H<sub>2</sub>O (No change in CO<sub>2</sub>)
  - (4) Downloaded Denrometers  
THEN switched out 24x for 10x  
seems to be working (also output  
std. deviations) ≈ 12500
  - (5) Between 2-2:30 Downloaded  
23Tc, 23KA & CR10MRS
  - (6) Switched out D AIR AT 1:00  
Replaced fitting (may need to leak check)

5/1/02 - Figuring out time shift  
on 23xTc datalogger

=> Know - THE DOWNLOADED ON 4/18 WAS SCREWED UP  
Question - what ABOUT data prior to 4/15 & 4/2  
Downloads  
=> Re-saved ~~data~~ raw data file from 4/18 w/7  
correct time tags - need to look at  
March to see ~~if~~ how far time error  
goes back!

=> Looking at DATA - Denrometers died in  
December => DATA SUCKS AFTER THAT.

# — WIRING ON Denodrometers logger —

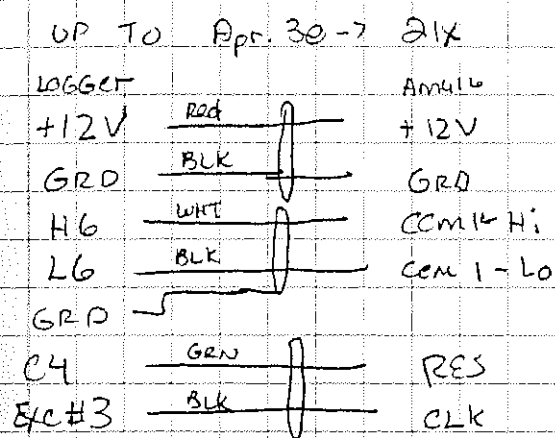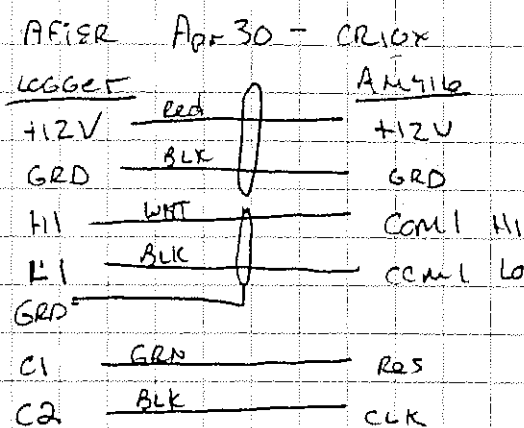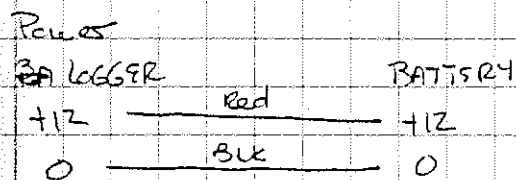

← some power configs.

Probably doesn't matter - looks like POD still working in December



WIND speed & Direction comparisons for the month of April 2002  
 CSAT-3, ATI-1K & RMY vane ALL set at same height ( $z = 21.5m$ )

Wind Speed at 21.5 m

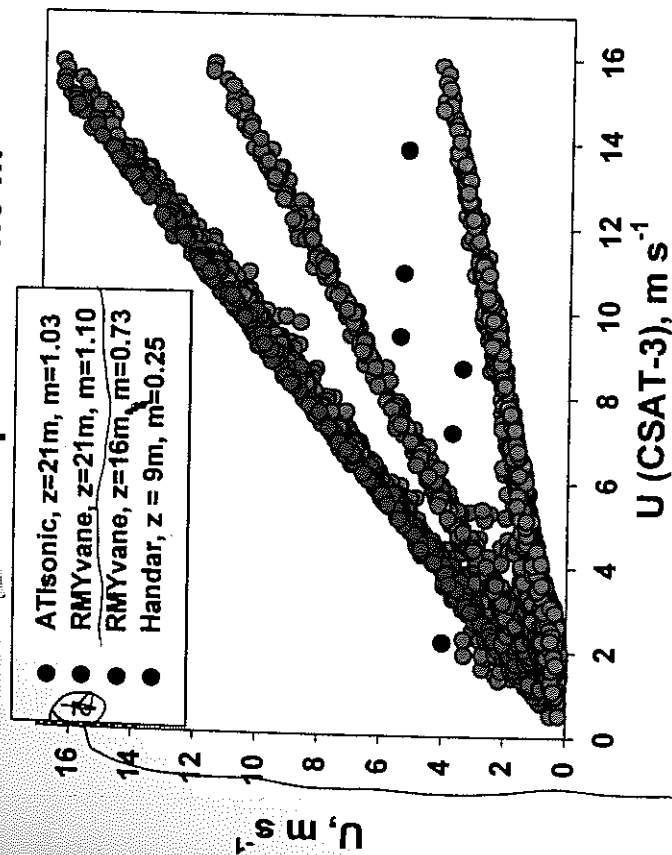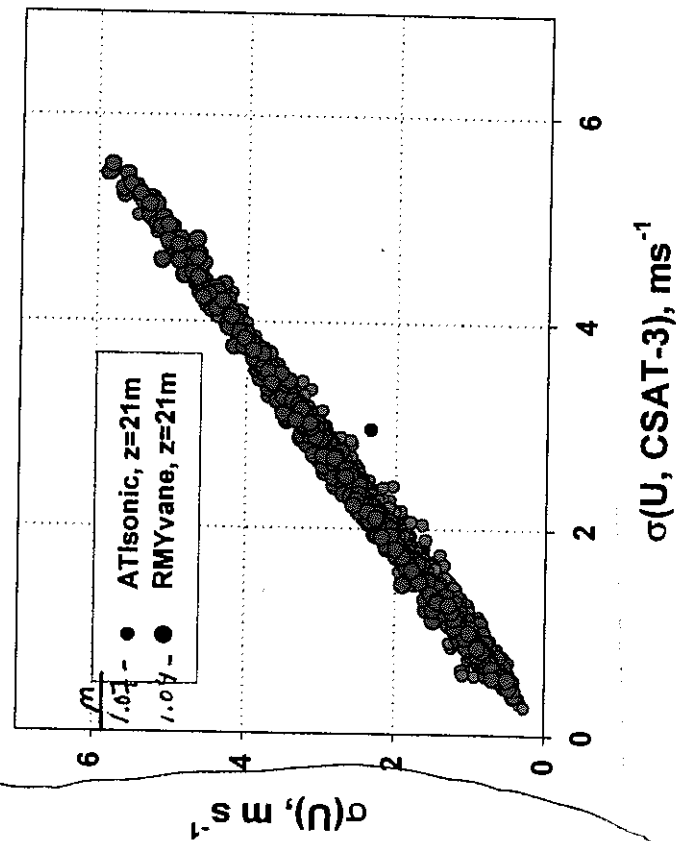

Wind Direction at 21 m

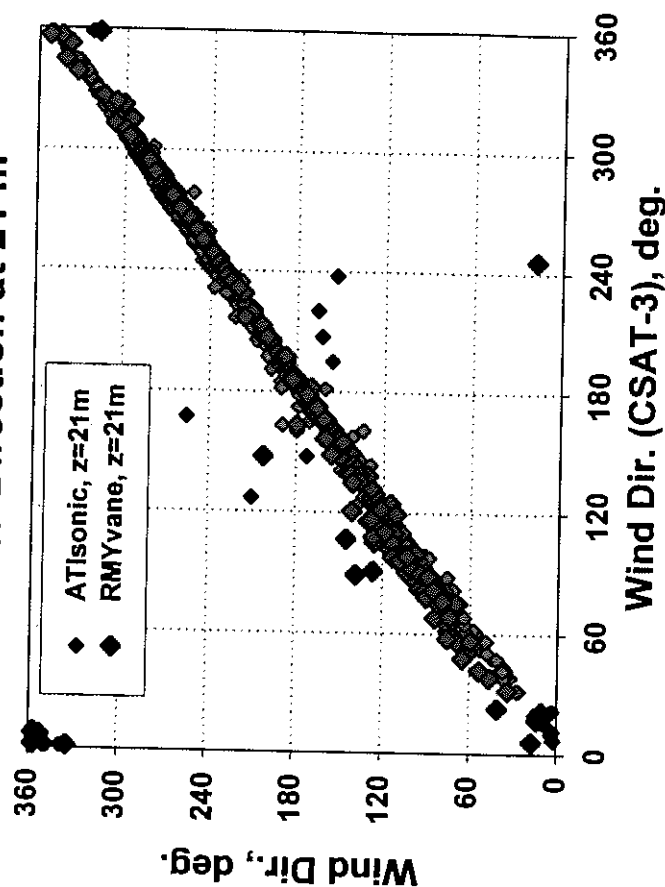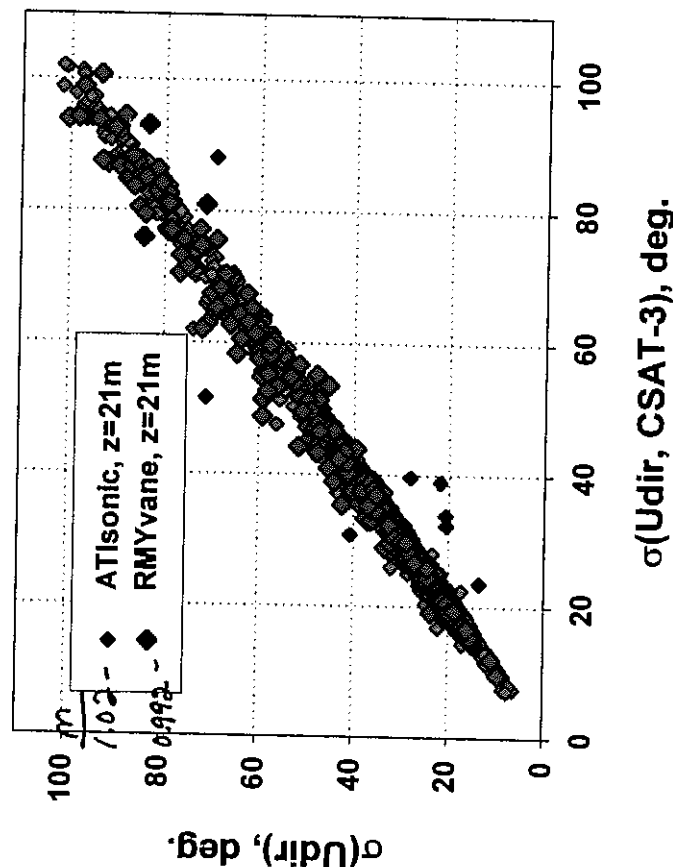

Note on RMYvane at 26m  $\Rightarrow$  was using incorrect cal.  $\# \Rightarrow$  slope should be ~~0.992~~ 1.002 very good!!

Wind Speed at 2m

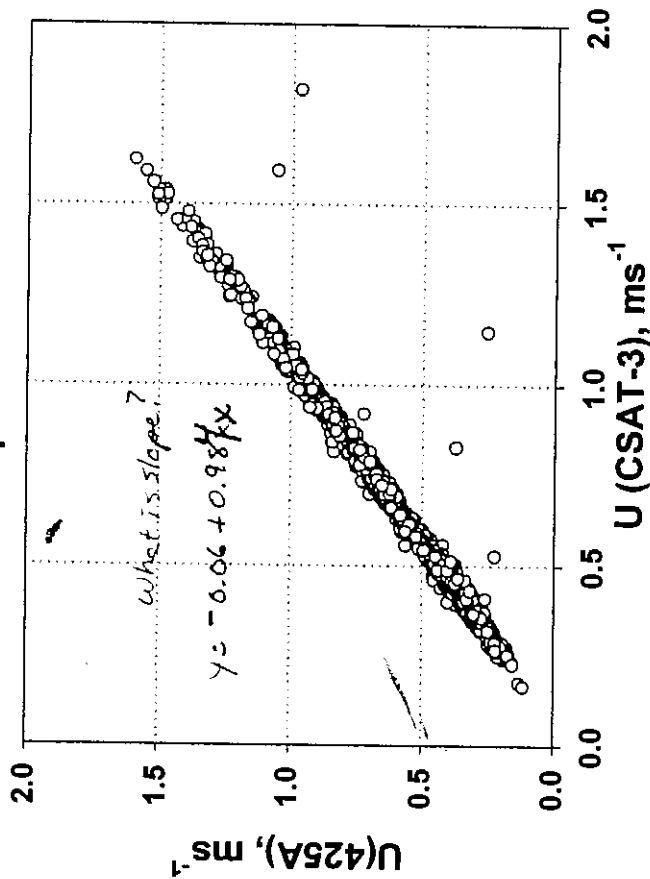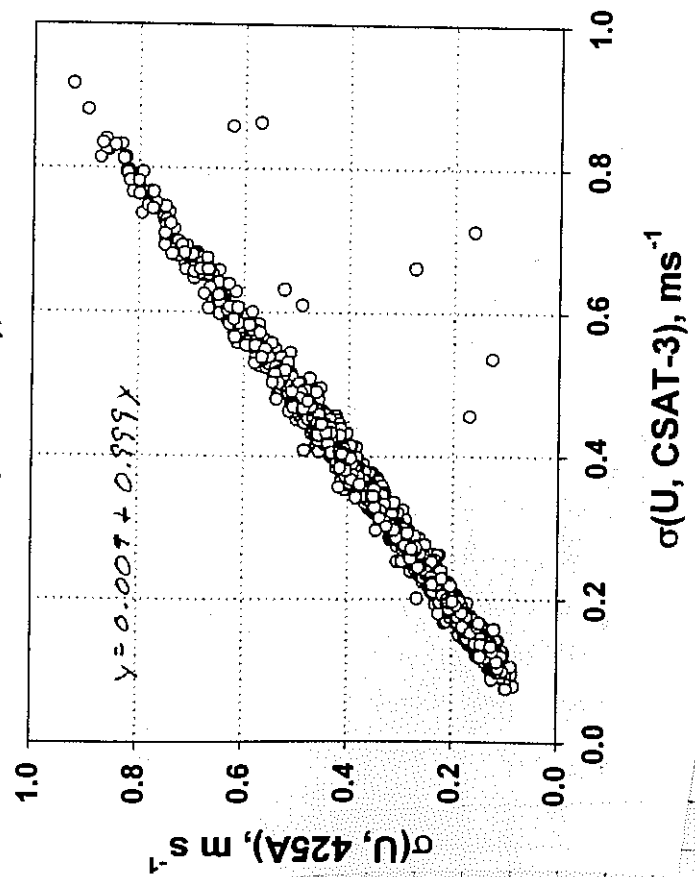

Wind Direction at 2m

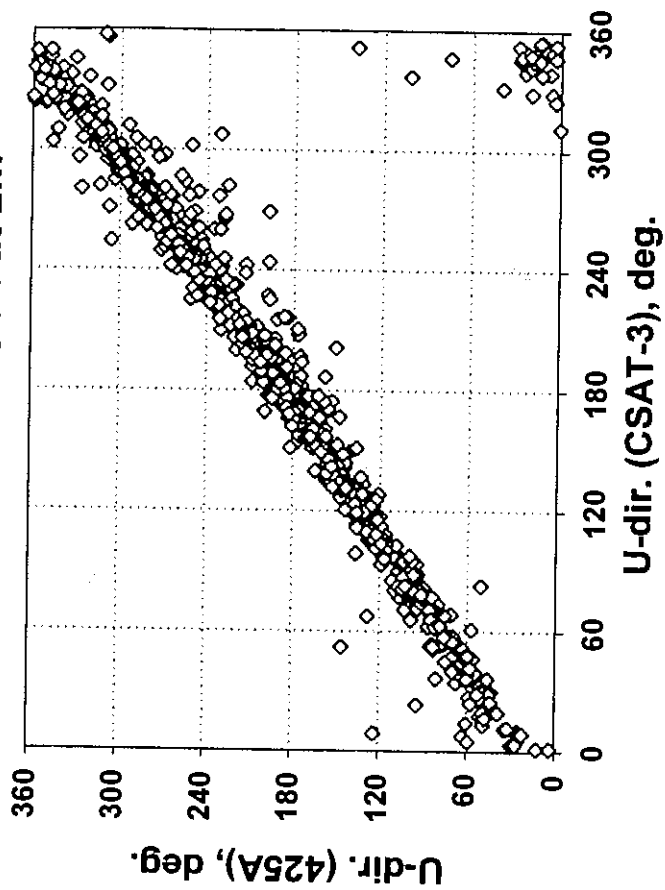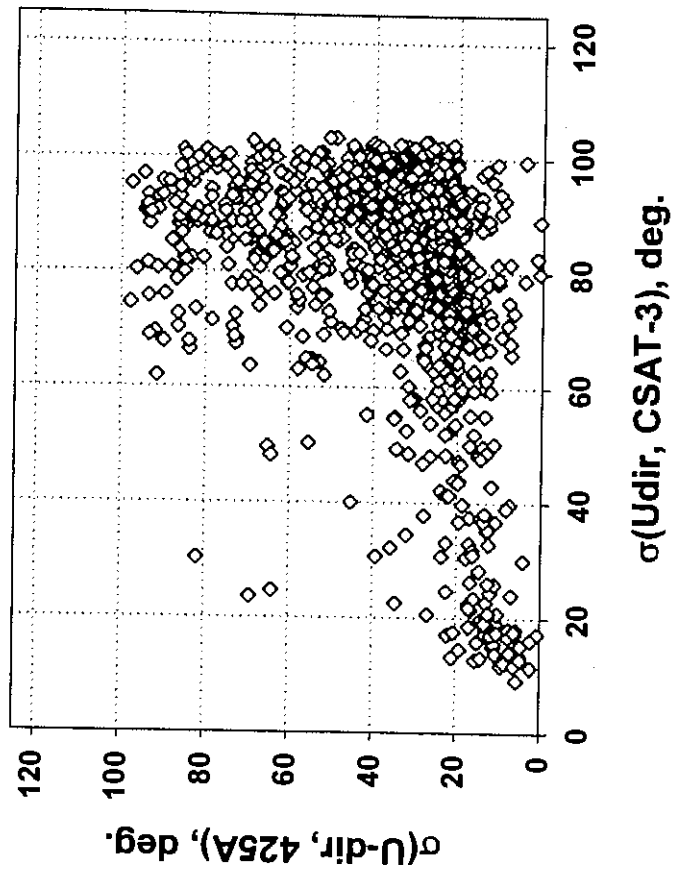

5/10/02 ① Bill  $\Rightarrow$  switched dessicant on profiler - ~10:30 AM

②  $\Rightarrow$  switch positions on Handar 6m + CSAT-1m

Reversed positions - still running  
comparisons AT 2m

~~computer~~ 11:00-12:00

③ Put new program E5423x7.csi IN

$\Rightarrow$  has hi resolution for CO<sub>2</sub> channel

loaded about 10:30 - Restarted DUCK AROUND 11:00

Seems to be working

④ Took out voltage divider in EC-inga ~1:00 PM

⑤ Bill fixed ventilator shaft ~~and~~ RH/T sensor AT 2.5m

⑥ switched out REBs radiometers & releveled  $\Rightarrow$  1:30-2:15

⑦ Hooked up CNR-1 back top of tower.

(Disconnected undercanopy AT 11:30 AM)

Running AROUND 3:30 (logger was off from  
3:00-3:30)

\* Note looks like PAR-up had a bad connection

AFTER THIS  $\Rightarrow$  Bill went back out to check at 4:00 PM

⑧ Sec100

Signal had gone way down overnight  
From 400 mV  $\rightarrow$  ~0 mV (w/ -150 mV offset)  
Target still looked quite yellow

$\Rightarrow$  Accidentally left turned off from  
11:00  $\rightarrow$  3:00 PM

$\Rightarrow$  When turned back on  $\Rightarrow$  hooked old electronics  
board up  $\Rightarrow$  saw only 64 mV of signal!  
(very low!! need more dye on targets)

⑨ Turned off dendrometer power supply  
was giving -5.2V & +3.8V

ON 5/9/02  $\Rightarrow$  Took light shield off at Li7500 (~11:00 AM)

Took down Sec100  $\Rightarrow$  put in new electronics & new target

$\Rightarrow$  Back running ~3:00 PM

5/16/02 - UC/EC system off at ~ 11:00 AM

- moved little  $\Delta$  Tower

moved IR-T ~ 11-11:30 AM (did not disconnect)

5/23/02 - New O<sub>3</sub> TARGET (10:45)

- Put Light SHIELD BACK ON L:7500 (11:00)

- Short inlet line on Barts O<sub>3</sub> (no real difference)

ZEROPING O<sub>3</sub> ANALYZERS  $\Rightarrow$  12:15  $\rightarrow$  1:15

New Sealed inlet line ~ 12:30

SIGNAL WENT DOWN ??!

can't find a good inlet (clean tube)

NEW 7' AIR ~ 1:15 PM (~800 psi)

5/29/02

2 THINGS wrong w/ profiles

① Hole in one of lines (BEHIND profile)

Fixed: 10:30 AM

② Leak at Dessicant trap  $\Rightarrow$  won't zero

Replaced dessicant - then zeroed OK

(Pressure lower than usual  $\Rightarrow$  ~40 mV)

$\Rightarrow$  1:00 PM  $\Rightarrow$  everything OK

NEW (O<sub>3</sub>) inlet line  $\Rightarrow$  sort of running AT 12:00

THEN moved 2B O<sub>3</sub> SENS to top of tower

$\hookrightarrow$  DEC between 1-2:00; THEN running again

For slow

O<sub>3</sub> SENSORS

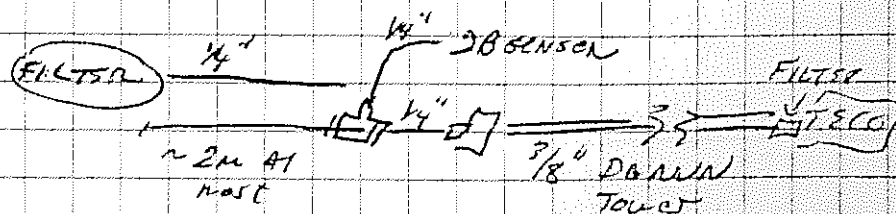

Downloaded met & profile loggers



5/30/02

- New Target in Scaled (~~12:30 PM~~)
  - ⇒ may have fried Tehu Franks electronics - doesn't seem to be working now.
  - ⇒ Switch inlet tubing again - no real change in  $O_3$  signal
  - ⇒ Signal was still very small ( $\sim 150 \text{ mV}$ ) even THOUGH warm SUNNY upstate day (but didn't look at flow sensors to see  $[O_3]$ )

Bill downloaded CNR logger

\* [ - 1:00-3:00; moved Hander on small tower back to 6.5m (END of comparison)  
moved CSAT-3 back to 1m height

⇒ Turned fans on in Duck &amp; EC system

Put in new double profile program AT  $\sim 3:00 \text{ PM}$   
watched thru one cycle & it looks OK

5/31/02

Lab tests on new disjunct sampler

- ① Flow Rate thru Sampler - (Reservoir + valves + some  $\frac{1}{2}"$  TUBING)  
⇒ scale of 150 slpm meter

|                                                            |
|------------------------------------------------------------|
| RAN $\phi$ AIR THRU my 0-10 lpm → THEN thru big controller |
| 0-10 slp MFC                                               |
| 9.99                                                       |
| 5.00                                                       |
| 0-150 MFC                                                  |
| 0.068 ⇒ $\times 147$                                       |
| 0.036                                                      |

using ALS small pump  
Big pump

Flow = 0.108 ⇒  $\sim 16 \text{ Lpm}$   
= 0.51 ⇒  $75 \text{ Lpm}$

- ② Volume of Reservoir

weight empty = 41 g (106 g) (tare)  
weight full ( $H_2O$ ) = 367.2  
 $\Delta M = 326.2 \text{ g}$   
 $\rho(H_2O) = 1 \text{ g/ml}$

$V = 326 \text{ ml}$

## (3) Residence Time

$$F = 75 \text{ Lpm} = 1.25 \text{ L/sec} \quad V = 0.326 \text{ L}$$

$$f = F/V = 3.83 \text{ Hz} \quad (1/f = T_{res} = 0.26 \text{ sec})$$

can operate at 4 Hz (at least) <sup>To flush</sup>

(4) Testing O<sub>3</sub> inlet line that's been up since last year

| CONDITION           | O <sub>3</sub> , ppb |                     |
|---------------------|----------------------|---------------------|
| No tubing           | 106-108              | (steady for 5 min.) |
| Entire Inlet tubing | 104-105              | <u>Good!</u>        |
| No tubing           | 108-109              |                     |
|                     | 113-114              |                     |

Black portion of inlet only 110 ---→ 117 ---→ 120

→ looks good - probably our new sealed inlet!

6/6/02

→ Took down 2B O<sub>3</sub> sensor (10:00 AM)

→ Replaced inlet line on Sealed - used black Teflon that I lab-tested for O<sub>3</sub>

→ Replaced PMT w/ new one

→ Replaced target

Running w/  $F_{in} = 6.06 \text{ Lpm}$

⇒ Signal ⇒ 950 mV; -- probably a factor of 4-5 better w/ new tubing & PMT!!  
THIS should do the trick!

⇒ Possible problem - w/ new target, may go off scale (0-1000 mV range on logger)

⇒ easiest solution is to turn down PMT voltage a bit!!

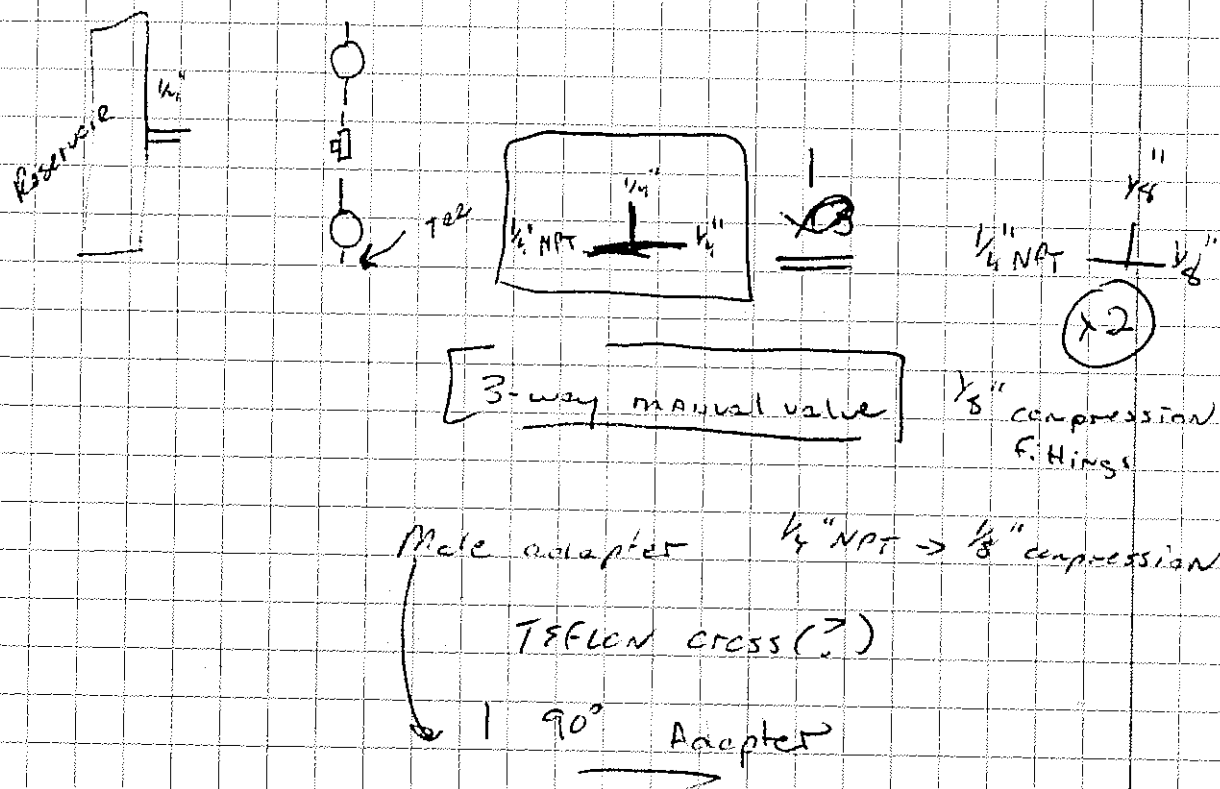

# 6/11/02 Downloading loggers

Tc 23x => Clock is off again

SHOULD BE 10:37 6/11/02  
Redds 10:35 5/8/02  
- Reset clock -

- Sealed. New Target ~ 10:30 AM
- 2B O3 sensor - running ~ 10:15 AM
- > New power supply on dendrometers ~ 11:00 AM

looks like it ran from JD 129 -> 130  
suddenly switched to JD 96  
=> DID NOT even miss a 15-min period

- > Under canopy system running on small base tower  
Z = 2.5m, Time = ~ 12:00 noon
- > Bill reoriented Hardar at 6m (2:00 PM)
- > new reference gas
- > cleaned Kr hyg. optics (~ 1:30 PM)

Need logger  
DATA from  
~ 10/02

6/12/07 -

Looking AT Sealed Spectra from yesterday

See O<sub>3</sub> Lab bookOverall  $\Rightarrow$  looks OK

6/27/02 - Things to DO:

AT Tower

- change inlet filters
- put up shadowband
- Download dataloggers (Dendrometers too)
- move VANE up to 26m
- Add undercanopy radiometer
- check clock ON 23KTC
- keep Sealed running (more Targets?)

USE Gasband  
RUSSIAN Inga In-line

Data processing

- check radiometer coefficients
- check O<sub>3</sub> comparison
- Handar - CSAT comparison
- Are there differences in ECOT diurnality  $\Rightarrow$  new filters

Code - O<sub>3</sub> fluxes  $\Rightarrow$  write calculator  
NO<sub>x</sub> fluxes  
 $\Rightarrow$  DISJUNCT stuff

For disjunct sampler - start w/ 28 O<sub>3</sub> sensor  
- 46262

6/11  $\rightarrow$  6/28

order MgClO<sub>4</sub>  
email Brad Hall  
Gases for SF<sub>6</sub> exp.



7/5/02 Quake DIED AT 5:30 AM

Try to change data logger code

Met logger

analog 1  $\rightarrow$  8 Status OUT (EC system)

1/2 hr aug.  $\rightarrow$  analog 1  $\rightarrow$  8

Wind Direction could be funky, but otherwise OK

need to convert wind speed & direction on logger  
Don't just average the voltage.

Fast 23x -

Krypton  $\rightarrow$  DIFE channel 1 (found this & shift to DIFE channel 5)  
[loaded in ~ 3:30 PM]

Back to met

1 - w. die

2 - w. spd

3 - w. dir

4 - w. spd

10 - w. dir HAN

analog 9

11 - w. spd HAN

analog 10

Calibrating Deans Standard

| Run | Zero | T     | P (m) | Veer      | Sample T | P                  | V      | ECO <sub>2</sub> ppm |
|-----|------|-------|-------|-----------|----------|--------------------|--------|----------------------|
| 1   | 0    | 35.43 | 807   | 1337      | 35.39    | <del>809</del> 806 | 1662   | 463.51               |
| 2   | 0    | 35.30 | 807   | 1336 (OK) | 35.28    | 806                | 1666   | 464.885              |
| 3   | 0    | 35.23 | 807   | 1339 ✓    | 35.22    | 806                | 1666   | 464.795              |
| 4   | 0    | 35.17 | 807   | 1338 ✓    | 35.17    | 806                | 1666   | 464.720              |
| 5   | 0    | 35.16 | 807   | 1338 ✓    | 35.15    | 806                | 1666.5 | 464.883              |

Last 4  $\Rightarrow$   $464.82 \pm 0.08$   
 All  $\Rightarrow$   $464.56 \pm 0.59$

New met program - will output

|           |            |    |
|-----------|------------|----|
| Udir-26   | analog     | 3  |
| Udir-16   |            |    |
| Udir-9    | Real units | 9  |
| U-26      |            | 2  |
| U-16      |            | 4  |
| U-9       |            | 10 |
| RH1       |            | 5  |
| RH2       |            | 6  |
| RH3       |            | 7  |
| Pressure  |            | 8  |
| Status.ec | Status.out |    |

6 → 5 rps

met30D.csi → should output  $u, \bar{u}, \sigma, \sigma(\theta)$  for  $k_2$  - h.c. AVG.

Profiles 1  
2  
3  
4 >  
5 /  
Wet  
PR1  
PR2  
PR3

$4 \times 3 = 12$

22

7/7/02

met logger - still on std. Time - reset to MET  
New program met30D.csi (~7:30 AM)

2  
540  
0.6  
3240  
0.0108  
3000  
32400

0.106

5000 = 540  
8.12  
5000.00  
4320  
680.0  
540.0  
140.0  
108.0  
320.0

8.12

3000 = 0.6  
5000

WIND DIR  
CHANGED COEFFICIENT TO 0.108

3000 / 0.0108

3000 / 0.0108

1.5 min

$$\begin{array}{r} 1.666 \\ 60 \overline{) 100.00} \\ \underline{60} \\ 40.0 \\ \underline{36.0} \\ 4.00 \end{array}$$

ProFilter also ON std. time - Reset to MOT

HAD TO REASSESS proFilter -

Now spends 60 sec. on each level  
RUNNING Avg of 15 sec.

ToDo:

- ① Move 2:7500 BACK over near A71
- ✓ ② CHANGE filters on proFilter (All 6 levels)  
↳ put rain shield on 10m
- ✓ ③ change dessicant in proFilter
- ④ change inlet filter on EC system (AT service)
- ⑤ clean Kr hyg. optics
- ⑥ Change met30D program - put in correct cal. constants  
+ reload program

7/11 13:30

7/8 => Replaced Duck hard drive

7/11 DAC config. on Peters Lieco -

CO<sub>2</sub> => OV ~~25~~ ppm  
5V = ~~50~~ ppm  
475

H<sub>2</sub>O OV = 0 mmol mol<sup>-1</sup>  
5V = 25 mmol mol<sup>-1</sup>  
25

CHECKING cal.

Zero -

83.3 ppm - CO<sub>2</sub>

TRY TO ZERO => 59.1 ppm

4.96 - H<sub>2</sub>O

=> 4.30 mmol mol<sup>-1</sup>

CO<sub>2</sub> = 345.7 ppm Span -

|           | AMP |
|-----------|-----|
| 1 - WHI.  | 1   |
| 2 - RED   | 2   |
| 3 - BLK 1 | 3   |
| 4 - BLK 2 | 4   |
| 5 - BLK 3 | 5   |
| 6         | 6   |

SIGNAL CABLE

CO<sub>2</sub> DAC1 - RED  
GRD - BLK

H<sub>2</sub>O DAC2 - WHI  
GRD - BLK

# Catching up on Site work

Double Profiler program on 5/30/02

## OLD configuration

## new configuration

| Level | Location   | Port                 | New Position | New Level |
|-------|------------|----------------------|--------------|-----------|
| 1     | USGS - TOP | 1000                 | USGS - TOP   | 1         |
| 2     | USGS 10m   | 1100                 | N - 6m       | 7         |
| 3     | USGS 6m    | <del>1100</del> 1010 | USGS 8m      | 3         |
| 4     | USGS 4m    | <del>1001</del> 1110 | USGS - 5m    | 5         |
| 5     | USGS 2m    | <del>1101</del> 1001 | USGS 2m      | 9         |
| 6     | USGS 1m    | <del>0000</del> 1101 | USGS 1m      | 11        |
| 7     | CU 26m     | <del>0000</del> 0000 | CU 26m       | 2         |
| 8     | CU 10      | <del>0010</del> 0100 | N 1m         | 13        |
| 9     | CU 6       | <del>0110</del> 0010 | CU 8         | 4         |
| 10    | CU 4       | <del>0001</del> 0110 | CU 5         | 6         |
| 11    | CU 2       | <del>0001</del> 0001 | CU 2         | 10        |
| 12    | CU 1       | <del>0101</del> 0101 | CU 1         | 12        |
| 13    | S 6        | <del>0101</del> 1011 | S 6          | 8         |
| 14    | S 1        | 0011                 | S 1          | 14        |

order

TOP → BOTTOM

N = North

USGS → CU → N → S

S = South

ON July 3

- Downloaded data loggers (soil, Tc23+ dendrometers)

July 5TH - Bill downloaded tower data loggers while Duck was Dead. Moved Li7500 close to CSAT-3

July 7TH - loaded new met + profile programs into loggers  
Downloaded tower loggers

July 8TH - Duck up & running again (put Fast23x7.csi back into fast logger (downloaded 1st))



7/11/02

Bill -

- Replaced profiler dessicant & filters
- Moved Li7500 back close to ATI
- cleaned Kr hyg. optics
- change EC inlet filter

new Target?

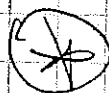

- ~~deleted~~ put in new met30D.csi program (Did he download data first?)
- Also put in 21sonic.csi in UCEC logger (had lost power)

⇒ 3:00 = shutdown DUCK  
& replaced UPS (also plugged ATI sonic into surge suppressor)  
When restarted - 2<sup>nd</sup> power supply in DUCK didn't come back up  
Had to replace power supply ⇒ then seemed to be working fine

15/02 Starting disjunct sampler

Before - zero + span IRGA

|      | CO <sub>2</sub> | H <sub>2</sub> O             |
|------|-----------------|------------------------------|
| zero | 18.5 ppm        | 2.349 mmol mol <sup>-1</sup> |
| SPAN | 368.2 (set)     | same                         |

→ [CO<sub>2</sub>] = 375.7 ppm

Reset DAC channels

CO<sub>2</sub> 0-5V ⇒ 0 ppm → 450 ppm  
H<sub>2</sub>O 0-5V ⇒ 0 → 25 mmol mol<sup>-1</sup>

new selected TARGET

⊛ At least 2 more trips just to restart DUCK

7/18/02 New CO<sub>2</sub> cal. tank

| RUN | ZERO | span  |     |  | V <sub>cal</sub> | sample |     |      | ECO <sub>2</sub> |
|-----|------|-------|-----|--|------------------|--------|-----|------|------------------|
|     |      | T     | P   |  |                  | T      | P   | V    |                  |
| 1   | 0.0  | 35.63 | 816 |  | 1337.3           | 35.82  | 815 | 1357 | 416.61           |
| 2   | 0.0  | 36.48 | 816 |  | 1336.5           | 36.70  | 815 | 1535 | 416.32           |
| 3   | 0.0  | 37.15 | 816 |  | 1334.8           | 37.33  | 814 | 1535 | 417.29           |
| 4   | 0.0  | 37.58 | 815 |  | 1332.6           | 37.68  | 814 | 1532 | 416.52           |
| 5   | 0.0  | 37.92 | 815 |  | 1331.5           | 38.00  | 814 | 1531 | 416.71           |

416.7 ± 0.4 ppm

[Put on at ~2:00 PM]

7/24/02

Duck Dimensions10 1/2" deep  
23 1/2" wide  
30" TALL

PORT 4 1/2" → 10"

12" TO TOP OF power supplies

- New Sealed target (7/18/02 PM)
- ~~new~~ Clean restrictor in NO<sub>2</sub> sensor
- [Back on AT 2:00 ⇒ using AIR (not O<sub>2</sub>)]
- CHANGED DOUBLE Profile program calibrates every 2 hrs.

New change

7/25/02

Want to:

- < Replace Flow controller w/ meter in DISJUNCT sampler (needle valve)
- < TEST values ⇒ Do we need to switch air α-value?

Deans CO<sub>2</sub> tank

| RUN | ECO <sub>2</sub> |
|-----|------------------|
| 1   | 413.67           |
| 2   | 414.02           |
| 3   | 414.43           |
| 4   | 414.57           |
| 5   | 414.33           |

414.2 ± 0.4 ppm

7/30/02 - Moved south canopy access tower  
to new location

8/22 16000  
File  
channel 204 !!  
screwing up!!

7/31/02 → Aug. 2

Replacing DUCK ⇒ Antennas likely shot (lost data)  
Evenings running old DUCK  
on Aug 2 (Friday) - left running channels 200, 201 + 202, 3  
Power out over weekend

8/5/02 - Brian Lamb arrives

⇒ Hooked up rest of channels to new DUCK  
⇒ New standard on Double Profiler  
⇒ New program in Double Profiler ⇒ Added SE<sub>6</sub>

8/6/02 Jeilun + Sean up ⇒ Big Rainstorm

8/7/02 Took GPS readings

8/8/02 New Dessicant in profiler  
Downloaded loggers  
New Sealed target

// [ NGy sensor out of CO  
turned off ]

8/12/02 Brought up balloon w/ Alex, Jim + Peter

8/13-14 worked on balloon

~~Notes~~ To Do:

- Data - ① Run Fumes for Aug 1-10 ⇒ [Berun wind profiles]
- ② Run logger input, wind combine for July ✓  
↳ Rewrite for new met data ✓
- ③ THEN RUN monthly.g. >> print off graphs

- Site: Disjunct Sampler
- Switch out AT1 sonic
- Switch 2-value
- Try different pump

// need to copy  
new DUCK code  
to russter !!

At site

For Bill - ① Buy some shelf hardware

⇒ shelves - Greenbergs lab

⇒ hardware - McGuckius

3 - strips

6-8 shelf supports

[8" shelves] ⇒ Plexiglass would  
be best!!

② Switch out REBr radiometer

③ Make some new dessicant traps

⇒ Disjunct sampler -

- Run at trailer (can hook up NCAR ATL sonic)

↳ set up like mine w/ Hyperterminal

→ switch out α-valve

→ put MFC back in (use AMP connector)

→ Test some pumps - pumping out of reservoir

8/20/02

Hooked up Teuluns TC array

TD channel 207 = 1 Hz

Working - but intermittent noise

↳ Not logging at 1 Hz ⇒ seems to be missing  
some bytes in the data stream

8/22/02

Not at site -

Channel 204 - Began looking like channel 207  
missing data bytes

8/26/02

- Tried cycling power on logger ⇒ still messing up

- Turned off channel 207 ⇒ momentarily channel  
204 looked ok, but didn't last

8/27/02

⇒ ~~Used~~ Monitored ATL sonic directly w/ laptop  
Nothing funky w/ data stream - sonic is  
not reason for wrong rep. rate?

→ Channel 207 - back on ~ 4:00 PM

→ Moved L7500 close to Campbell sonic (~ 2:30 PM)



To Do:

Bill

- ① Put shelves in DLRK?
- ② ~~Disjoint in Profiter~~
- ③ New Filter in EC system
- ④ Move equipment to top of tower

→ Help Teresa as much as possible  
→ Get cable for her

me

- ① switch channels 204 & 206  
↳ check router (can check from quacker)
- ② New ~~Disjoint~~ for quacker
- ③ Switch out AT1 sonic (move L2500 back over)
- ④ Help Teresa hook up CO to Fast 23x

⊗ If time - Try to monitor data logger output directly ⇒ have to output in ASCII

⑤ New Target for SUCCESS !!

Then help w/ ballast

- Depending how this goes -  
Add everything into to Undercan. 23x !!
- Try -
- ① switch channels
  - ② switch short hauls (at quacker)
  - ③ switch cabling (at quacker)

make sure I have level in bag

8/26/02

10:30 → 12:00 PLAYING w/ Switching channels around.

Found bad short haul modem on channel 204

Replaced & it seems data is being recorded

At 10 Hz now

New Seclod Target ( $\sim 10:30$ )

- B:11 ⇒
- Switched decimeter in profiler  $\sim 11:00$
  - Switched EC Filter  $\sim 11:30$
  - Moved RMY vane from 24 m → 26 m ( $\sim 1:00$  running)

⇒ switched out All sonic; now its Rop rate was 10 Hz ⇒ seems like it could have been the sensor

cockpit problem - suddenly gives dead channels, but rserial & data-stats indicate data is OK!!

- 8/26 ⇒ Data-stats shows some funny things for channel 206
- ~~seem~~ look at start & end times
  - seems to drop out for hours at a time
  - No apparent reason.
  - Need to look at ~~some~~ data w/ Splur

① combine channels 204 + 206

into 1 data logger (have to make an extension cable for Li7500)

② Move quacker to new box (Restart quacker & ruster!!)

③ check data; Aug. 21-31 = does it look OK?

(try working w/ graphing! ⇒ still need to look at undercanopy winds though?!)

④ back ATI (make some graphs)  
more short haul modems (Back box)

Kathleen Barney lewney@ucar.edu  
Wind Sys Sonic K

Property tag #, Serial #, model #

9/11

Testing Li800

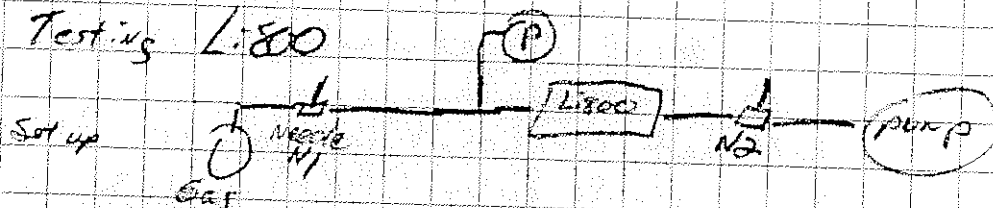

Adjust N1 & N2 to vary pressure

Run #1 Filename 020911a.txt

| <del>P</del> | <del>T</del> | P (KMS)                           | T (K) | N (KMS)             |
|--------------|--------------|-----------------------------------|-------|---------------------|
| Start →      | 1            | 699                               |       | 384                 |
|              | 2            | 627                               |       | 384                 |
|              | 3            | 536                               |       | 377                 |
|              | 4            | 569                               |       | 379                 |
|              | 5            | 586/7                             |       | 378.3               |
|              | 6            | 509                               |       | 37                  |
|              | 7            | Readjusted flows (High flow rate) |       |                     |
|              |              | 502                               |       | 370-370             |
|              | 8            | 475                               |       | 366.0               |
|              | 9            | 645                               |       | ~ 385               |
|              |              | Pump off                          |       |                     |
|              | 10           | 802                               |       | 390 → back to 386-7 |

Allowed a few  
minutes at  
each pressure

Pretty unstable

Sampling

checking Pressure Sensor vs. MKS

| Li800        | MKS |
|--------------|-----|
| 1060 (AAAAH) | 809 |
| 848          | 645 |
| 754          | 574 |
| 724          | 551 |
| 673          | 512 |
| 625          | 476 |
| 802          | 609 |
| 923          | 760 |

9/3/02 To try & fix cockpit bug - tried rebooting quacker over the net - she never came back

9/4/02 At site - quacker was locked up - ~~didn't~~ rebooted ~~it~~  
some file errors - tried to fix

THEN rebooted - came up but now ALL channels were missing data!

See Duck manual for further description of problem & the eventual fix

⇒ ~~Just~~ combined channels 204 & 206 into 204  
Also set up 1/2-hr back-up of undercanopy wind speeds & directions.  
(~ 5:00 PM)

Other times at site:

- Friday - Sept. 6

- Mon. - Sept. 9

THURS. - Sept. 12 ⇒ finally think we've fixed quacker problem

9/16/02 Repeating 9/11 exp. on Li800 w/ pressure compensation off!

No compensation

started 11:22

File 020916a.txt

| <u>P (Nks)</u> | <u>Torr</u> | <u>~ [CO<sub>2</sub>]</u> | <u>P (ing)</u> | <u>Time</u> |
|----------------|-------------|---------------------------|----------------|-------------|
| 737            |             | 380 ppm                   |                | 11:22       |
| 813            |             | 439.5                     |                |             |
| 660            |             | 325                       |                | 11:29       |
| 591            |             | 2?                        |                | 11:30       |
| [504           |             | 221                       |                | 11:32       |
| 469            |             | 199.6                     |                | 11:33       |
| 547            |             | 249                       |                | 11:35       |
| 612            |             | 291.4                     |                | 11:38       |
| 695            |             | 349.2                     |                | 11:42       |

Quit ⇒ 11:43



W7 pressure compensation

File: 0209166.txt

| <u>Time</u> | <u>MKS</u> | <u>~CO<sub>2</sub></u> |
|-------------|------------|------------------------|
| 11:44       | 694        | 387.1                  |
| 11:46.7     | 805        | 391.8                  |
| 11:49       | 611        | 381.7                  |
| 11:51       | 532        | 374.2                  |
| 11:52       | 470        | 366.3                  |
| 11:55       | 499        | 370.7                  |
| 11:57.58    | 574        | 379.2                  |
| 11:59       | 751        | 389.8                  |
| 12:01       | 651        | 385.0                  |

Left Pressure Compensation ON

020916 PDA. POB

cycled power on L1800

New recording data w/ PDA

| <u>Time (my watch)</u> | <u>MKS</u> | <u>~CO<sub>2</sub> (on PDA)</u> |
|------------------------|------------|---------------------------------|
| 1:16                   | 652        | 387.                            |
| 1:19                   | 750        | 392                             |
| 1:21                   | 616        | 384.                            |
| 1:25                   | 574        | 381.5                           |
| 1:26                   | 522        | 376                             |
| 1:27                   | 476        | <del>365.4</del> → 370 ppm      |
| 1:30                   | 690        | 389.4                           |

TURNED P-comp. off // Powered L1800 off/on

| <u>Time</u> | <u>MKS</u> | <u>~CO<sub>2</sub> (on PDA)</u> |
|-------------|------------|---------------------------------|
| 1:43        | 687        | <del>38</del> 346               |
| 1:47        | 764        | 400                             |
| 1:50        | 623        | 300.7                           |
| 1:52        | 493        | 216                             |
| 1:55        | 541        | 247                             |
| 1:58        | 592 → 588  | 279 → 277                       |
| 2:00        | 738        | 384                             |

on and/over/edu

under /or/turnip/empdata

## ANALYZING L800 START

Run from 9/11A:

Press. Comp = ON

⊕ AVG of 50 points

Point

Pressure (L800)

P (MKS)

TC027 ⊗

1

920.4 whor

 $386.88 \pm 0.45$ 

2

824.0

 $384.67 \pm 0.32$ 

3

704.3

 $376.88 \pm 1.21$ 

4

742.3

 $379.68 \pm 0.51$ 

5

771.5

 $381.08 \pm 0.47$ 

6

668.9

 $369.31 \pm 3.08$ 

7

660.4

 $371.74 \pm 0.54$ 

8

623.8

 $369.95 \pm 0.49$ 

9

849.4

 $385.74 \pm 0.46$ 

10

1057.05

 $388.62 \pm 0.34$ 

From 9/16:

Press. Comp = off

972.9

 $380.24 \pm 0.096$ 

1074.2

 $439.42 \pm 0.112$ 

874

 $325.51 \pm 0.15$ 

779.2

 $276.28 \pm 0.096$ 

665.3 (!)

 $250.0 \pm 0.00$ 

722.7

 $248.5 \pm 0.092$ 

809.3

 $291.97 \pm 0.40$ 

918

 $349.33 \pm 0.103$ Press. Comp = ON

916.7

 $387.34 \pm 0.17$ 

1062

 $391.97 \pm 0.14$ 

806.9

 $381.83 \pm 0.16$ 

701.9

 $374.41 \pm 0.16$ 

620.1

 $366.27 \pm 0.14$ 

659.2

 $370.79 \pm 0.24$ 

756.8

 $378.84 \pm 0.13$ 

991.2

 $390.02 \pm 0.16$ 

860.6

 $384.97 \pm 0.16$ Gonport  
Hill  
ChapmanSingle 2 par.  
Single 8 par.  
Log.

(\*) THESE go backwards in time  
most recent at top of files!!

DATA from PDA - P-comp=ON

| Point | P(Li800) | P(MKS) | ECO <sub>2</sub> (A <sub>5</sub> - 50pts) | Hpts |
|-------|----------|--------|-------------------------------------------|------|
| 1     | 910.6    |        | 389.81 ± 0.71                             | 29   |
| 2     | 628.7    |        | 376.85 ± 0.22                             | 30   |
| 3     | 689.7    |        | 376.55 ± 0.30                             | "    |
| 4     | 757.3    |        | 381.54 ± 0.13                             |      |
| 5     | 813.0    |        | 384.85 ± 0.21                             |      |
| 6     | 994.8    |        | 392.08 ± 0.14                             |      |
| 7     | 860.60   |        | 387.61 ± 0.22                             |      |
|       |          |        | <del>385.95 ± 0.143</del>                 |      |
| 8     | 811.8    |        | 386.36 ± 0.82                             |      |

DATA from PDA: P-comp=off

|   |        |                |
|---|--------|----------------|
| 1 | 715.96 | 247.48 ± 0.40  |
| 2 | 650.44 | 216.29 ± 0.25  |
| 3 | 822.6  | 300.81 ± 0.30  |
| 4 | 1004.6 | 400.93 ± 0.48  |
| 5 | 905.8  | 345.39 ± 0.12  |
| 6 | 908.2  | 342.98 ± 0.499 |

could  
be  
old

910.6

974.12  
777.5

389.80 ± 0.70  
376.85 ± 0.22

OLD  
File!

383.42 ± 0.65  
277.81 ± 0.56

For P-comp, P < 900 mbar

$$ECO_2 = 320.2 + 0.07825[P] \\ \pm 3.60 \quad \pm 0.0048$$

$$R^2 = 0.936$$

For UN-comp, = ALL PTS.

$$ECO_2 = -134.0 + 0.5299[P] \\ (\pm 5.694) \quad \pm 0.00658$$

$$R^2 = 0.9982$$

If we look at uncompensated data

Plot  $[CO_2] \frac{P_0}{P}$  vs.  $P$  where  $P_0 = 1013 \text{ mbar} = 1 \text{ atm}$

~~Linear~~ Linear -

$$Y = 215.287 + 0.1868[P] \quad R^2 = 0.9961$$

At  $1013 \text{ mbar} \Rightarrow [CO_2] \frac{P_0}{P} = \underline{404.5 \text{ ppm}}$

If extrapolate fit of P-comp data

to  $P = 1013 \quad [CO_2] = 399.5 \text{ ppm}$

What is Pressure Range balloon will see:

$$\Delta Z = \cancel{10000} 2500 \text{ ft} = 12400 - 9900 \\ = 3758 \text{ m} - 3000 \text{ m}$$

Pressure as func. of  $Z \Rightarrow \log(P) = 3.043 - (6.529 \times 10^{-5}) Z$   
( $Z$  in m)

①  $\Delta Z \Rightarrow$  corresponds to  $\Delta P$  Between  $703 \rightarrow 628 \text{ mbar}$   
 $P_{\text{comp}} = 5.9 \text{ ppm}$

$P_{\text{uncomp}}(w/P_0) = 14.0 \text{ ppm}$

② What if only 500 ft:  $152 \text{ m} \Rightarrow 703 \rightarrow 687 \text{ mbar}$

$P_{\text{comp}} = 1.3 \text{ ppm}$

$P_{\text{uncomp}}(w/P_0) = 2.8 \text{ ppm}$

298

20  $\rightarrow$  P  
21  $\rightarrow$  CO<sub>2</sub>



9/19/02 Calibrating Li800 AT TRAILER  
calibrated at  $P = 748 \text{ mbar}$

THEN TURNED ON PUMP

| Time                 | $P(\text{mV})$ on 6251                  | $V$  | $T$            | $\sim \text{LiCO}_2 800$ |
|----------------------|-----------------------------------------|------|----------------|--------------------------|
| 3:43                 | <del>-287</del> -42                     | 1095 | 22.22 (330.76) | $\sim 350.2$             |
| 3:47                 |                                         |      |                |                          |
| <del>3:47</del> 3:49 | 266 $\rightarrow$ 256 $\rightarrow$ 247 | 1180 | 22.14 (330.8)  | $\sim 349$               |
| 352                  | 67 mV                                   | 1127 | 22.12          | $\sim 349.5$             |
| 3:54                 | 768                                     |      |                | $\sim 365.5$             |

STEP & calibrate — Bern JRGAs

|      |       |              |      |       |        |        |
|------|-------|--------------|------|-------|--------|--------|
| 4:01 | 70.56 | 768          | 1371 | 22.04 | 345.5  | 345.7  |
| 4:03 | 73.35 | 952          | 1426 | 22.03 | 345.7  | 345.4  |
| 4:05 | 71.56 | 834          | 1389 | 22.04 | 345.02 | 345.05 |
| 4:07 | 69.36 | 689          | 1346 | 22.16 | 345.05 | 345.7  |
| 4:10 | 68.26 | 616 (68 kPa) | 1324 | 22.22 | 344.95 | 346.3  |
| 4:12 | 67.39 | 559          | 1307 | 22.36 | 345.03 | 346.1  |
| 4:14 | 66.19 | 480 (66 kPa) | 1282 | 22.43 | 344.49 | 346.6  |
| 4:17 | 64.62 | 376          | 1250 | 22.60 | 344.16 | 346.9  |
| 4:19 | 63.37 | 294 (63 kPa) | 1227 | 22.66 | 344.63 | 347.1  |

|      |                          |                |                                                       |
|------|--------------------------|----------------|-------------------------------------------------------|
| 4:22 | $\Rightarrow$ check zero |                | $\Rightarrow$ looks OK $\Rightarrow$ back to span gas |
| 4:24 | 61.87                    | 195            | 1197 22.80 344.45 347.2                               |
| 4:26 | 60.4                     | 100 (60.4 kPa) | 1170 22.90 (344.5) 347.6                              |
|      |                          |                | 69 344.71                                             |

Stopped at 4:29

w/ pump off / disconnected  $\rightarrow$  Li800 back to  $\sim 345.6 \text{ ppm}$

| Pressure | $\text{LiCO}_2, \text{ppm}$ | $P$   | $\text{LiCO}_2$   |
|----------|-----------------------------|-------|-------------------|
| 701.9    | $345.56 \pm 0.15$           | 615.2 | $347.59 \pm 0.18$ |
| 730      | $345.04 \pm 0.19$           | 600.6 | $348.25 \pm 0.14$ |
| 711.7    | $345.69 \pm 0.18$           |       |                   |
| 689.7    | $345.85 \pm 0.11$           |       |                   |
| 678.7    | $346.28 \pm 0.20$           |       |                   |
| 670.2    | $346.30 \pm 0.15$           |       |                   |
| 658      | $346.59 \pm 0.17$           |       |                   |
| 642.1    | $347.17 \pm 0.18$           |       |                   |
| 629.9    | $347.32 \pm 0.18$           |       |                   |

$$\text{LiCO}_2 = 362.2 - 0.0235 P$$

$$R^2 = 0.981$$

$$\Delta P = 130 \text{ mbar}$$

$$\Delta \text{CO}_2 = 3.2 \text{ ppm}$$

Now calibrating Peter's standard.

| Row | Spot | P   | T    | V    | P   | T                     | V      | CO <sub>2</sub> |
|-----|------|-----|------|------|-----|-----------------------|--------|-----------------|
| 1   | 0    | 762 | 23.3 | 1366 | 763 | <del>23.3</del> 23.38 | 1741.5 | 481.61          |
| 2   |      | 762 | 23.2 | 1366 | 763 | 23.16                 | 1736   | 479.12          |
| 3   |      |     |      |      | "   | 23.19                 | 1741   | 481.11          |
| 4   |      |     |      |      | "   | 23.24                 | 1736   | 480.03          |
| 5   |      |     |      |      | 764 | 23.33                 | 1736   | 479.49          |
| 6   |      |     |      |      | 763 | 23.35                 | 1740   | 480.96          |

Fit from my 6251

$$\text{CO}_2 = 339.04 + 0.0087 P(\text{in bar})$$

$$R^2 = 0.623$$

$$480.04 \pm 1.0 \text{ mmHg}$$

(1σ)

10/7/02 UMBS DISJUNCT DATA

| DAY                  | Time                | $\bar{w}^+_{up}$ | # samples     | $\bar{w}^-_{dn}$        | # samples | TOTAL      |
|----------------------|---------------------|------------------|---------------|-------------------------|-----------|------------|
| <del>176</del>       | <del>10-11:30</del> | <del>0.886</del> | <del>29</del> | <del>0.873</del>        |           |            |
| 176                  | 1030-11:00          | 0.732            | 42            | -0.7294                 | 33        | 75         |
|                      | 11-11:30            | 0.886            | 29            | -0.873                  | 26        | 55 (11:21) |
| wich                 | 12-12:30            | 0.496            | 30            | -0.589                  | 42        | 72         |
|                      | 11:30-12:00         | 0.769            | 29            | -0.685                  | 46        | 75         |
|                      | 12:30-13:00         | 0.737            | 37            | -0.671                  | 36        | 73         |
|                      | 13-13:30            | 0.669            | 33            | <del>0.698</del> -0.500 | 31        | 64 (13:24) |
|                      | 13:30-14:00         | 0.605            | 34            | -0.698                  | 40        | 74         |
|                      | 14-14:30            | 0.989            | 40            | -0.909                  | 33        | 73         |
|                      | 14:30-15:00         | 0.762            | 44            | -0.865                  | 30        |            |
|                      | 15:00-15:30         | 0.773            | 32            | -0.907                  | 43        |            |
|                      | 15:30-16:00         | 1.158            | 39            | -1.155                  | 31        |            |
|                      | 16-16:30            | 0.8177           | 35            | -0.9795                 | 40        |            |
| NO DATA IN 1630 file |                     |                  |               |                         |           |            |
| 177                  | 10-10:30            | 0.930            | 19            | -0.805                  | 51        |            |
|                      | 10:30-11:00         | 0.714            | 21            | -0.707                  | 12        |            |
|                      | 11-11:30            | 0.533            | 19            | -0.944                  | 52        |            |
|                      | 11:30-12            | 0.831            | 39            | -0.597                  | 34        |            |
|                      | 12-12:08            | 0.583            | 5             | -0.734                  | 6         |            |

10/28/02 looking at balloon calibrations

Spt. 23

| # | Time span     | Low ~ 343 ppm | High ~ 480 ppm           |
|---|---------------|---------------|--------------------------|
| 1 | 13:09 - 13:12 | 344.17        | 474.85                   |
| 2 | 17:10 - 17:13 | 348.39        | 478.97                   |
| 3 | 15:18 - 15:20 | 346.84        | 477.16                   |
| 4 | 16:39 - 16:41 | 349.05        | 480.00                   |
| 5 | 17:38 - 17:41 | 348.74        | <del>471.34</del> 478.49 |
| 6 | 19:46 - 19:47 | 348.57        | 479.15                   |
| 7 | 20:54 - 20:56 | 350.17        | 480.49                   |

| FLIGHT # | calibrations | Low    | High   | Int.                     | Slope  |
|----------|--------------|--------|--------|--------------------------|--------|
| 1        | 1, 2         | 346.28 | 476.91 | 19.238 <del>19.238</del> | 0.9535 |
| 2        | 2, 3         | 347.62 | 478.07 | <del>21.019</del> 21.019 | 0.9522 |
| 3        | 3, 4         | 347.95 | 479.08 | <del>19.646</del> 19.646 | 0.9572 |
| 4        | 4, 5         | 348.90 | 479.75 | 21.297 21.297            | 0.9551 |
| 5        | 5, 6         | 348.66 | 478.82 | 22.785 22.785            | 0.9501 |
| 6        | 6, 7         | 349.37 | 479.82 | 22.769 22.769            | 0.9522 |

$$y = \frac{P - \text{INT}}{\text{Slope}} \times (\text{CO}_2)$$

Sep. 24

| # | Time span     | Low (~343 ppm) | Hi. (~480 ppm) |
|---|---------------|----------------|----------------|
| 1 | 15:01 - 15:03 | 347.13         | 477.72         |
| 2 | 18:07 - 18:09 | 348.96         | 478.98         |



FLIGHTS

Sept. 23rd

| <u>FLIGHT #</u> | <u>Time span</u><br><u>From IRGA (#pts)</u> | <u>From met sonde (#pts)</u> |
|-----------------|---------------------------------------------|------------------------------|
| 1               | 13:27:18 - 14:02:18                         |                              |
| 2               | 14:21:00 - 14:52:48                         | 14:21:00 - 14:58:52          |
| 3               | 15:40:30 - 16:27:30                         |                              |
| 4               | 16:45:30 - 17:25:30                         |                              |
| 5               | 17:58:31 - 18:16:18                         |                              |
| 6               | 19:51:00 - 20:51:09                         |                              |

Sept 24

|   |                                |
|---|--------------------------------|
| 1 | 17:08 <sup>00</sup> - 17:46:42 |
| 2 | 18:12:00 - 19:08:54            |

Mileage - DATES AT SITE -  
 [ AUG. 1, 2, 5, 6, 7, 8, 20, 26, 27, 28  
 [ Sept. 4, 6, 9, 12, 19  
 [ Oct. 7, 18  
 Nov. 4

DATE DESTIN  
 52  
 #miles

11/12/02 Looking at soil heat flux plate data  
 in Sept.  $\Rightarrow$  Looks like plates # 3, 4, 5, 8, & 10  
 Are giving strange values - sometimes ~~100~~  
 $\sim 100 \text{ W m}^{-2}$  offset - sometimes 0°C

Need to look at this sometime

~~11/13/02~~ Analysis of balloon data from ~~9/23/02~~  
 using NBL method of ~~Patterson et al.~~

11/13/02 Analysis of balloon data from 9/23/02  
 Using NBL method of Patterson et al., *Ag & For. Met* (2002), 113, 145-158

For all flights:

(I) Lined up sonde & CO<sub>2</sub> time series by matching pressure max & mins.  
 $\Rightarrow$  Used clock on the PDA for time tags

(II) Since sampling rates were different  $\Rightarrow$  read sonde & Licor data  
 into spss &  $\Rightarrow$  made my own time tags which are equally  
 spaced in time (based on start, end times of time series & # of points  
 from the sonde data - which is at a faster sampling rate)  
 $\Rightarrow$  THEN ROUNDED OFF real time tags & made them "fit" w/ new  
 time tags - THEN combined sonde & Licor  $\Rightarrow$  THIS fills in NAs  
 in either series where there is no measurement. THEN filled  
 in NAs by repeating ~~the~~ last value.

$\Rightarrow$  THIS gives time series where times are not exactly the true time  
 tag, but very close (& averages out to the right times overall)  
 & fills in empty data records

Now  $\Rightarrow$  can line sonde & Licor time series up!!

Now Break up each Flight -  
 Flight #6  $\Rightarrow$  19:52  $\Rightarrow$  20:51

Some Flight Info used:

CO<sub>2</sub> cal. on pg. 105

| FLIGHT | Times - IRGA        | #PTS | Times - SOURCE      | #PTS | $P_{max} = P_0$ (*) |
|--------|---------------------|------|---------------------|------|---------------------|
| 1      | 13:29:54 - 14:02:18 | 692  | 13:29:15 - 14:02:18 | 1192 | 703.5               |
| 2      |                     |      |                     |      |                     |
| 3      | 15:41:00 - 16:27:30 | 999  | 15:41:01 - 16:27:31 | 1805 | 714.24              |
| 4      | 16:47:21 - 17:25:30 | 816  | 16:47:21 - 17:25:30 | 1481 | 714.35              |
| 5      | 17:58:31 - 18:16:18 | 368  | 17:58:31 - 18:23:55 | 3315 | 714.51              |
| 6      | 19:52:06 - 20:31:06 | 1254 | 19:52:01 - 20:51:00 | 2248 | 714.3               |

(\*) Used as reference pressure to calculate altitude

Hysonetic Eqn:

$$gz = RT \ln \left( \frac{P_0}{P_z} \right)$$

$$g = 9.8 \text{ m s}^{-2}$$

$$R = 287.04 \text{ m}^2 \text{ s}^{-2} \text{ K}^{-1}$$

$$T = \text{Temp. (K)}$$

Now look at individual flights :

FLIGHT #6

| Ascent/descent | Rows (#pts) | Time (decimal)    | Median time | <del>Alt (m)</del> |
|----------------|-------------|-------------------|-------------|--------------------|
| 1              | 1 - 985     | 19.8669 - 20.2261 | 20:02:49    |                    |
| 2              | 986 - 1729  | 20.2261 - 20.4828 | 20:21:15    |                    |
| 3              | 1730 - 2254 | 20.4828 - 20.6756 | 20:34:45    |                    |
| 4              | 2255 - 2735 | 20.6756 - 20.8517 | 20:45:50    |                    |

Access

For Flux calc.  $\Rightarrow$

- (A) Get each asc/descent  $\Rightarrow$  sort by altitude  
 (B) Get AVG. of both profiles  $\Rightarrow$  AVG. all points within a given  $\Delta z$   
 $\Rightarrow$  Chose  $\Delta z = 2\text{m} \Rightarrow$  gives Avg. Profile

$$(C) \quad F - Adv = \sum_{i=12}^{186} \frac{\langle C_i - C_{i-1} \rangle_i}{\Delta t} \Delta z$$

$\Delta t$  = difference in median time  
 $\Delta z = 2\text{m}$

Start at 18m and integrate up to 187m (top of profile)

FLIGHT #6

| $\Delta$ asc/desc | $\Delta t(s)$ | $\Sigma F(184m) \text{ } \mu\text{g } \mu\text{m}^2 \text{ s}^{-1}$ | $\Sigma F(80m)$ |
|-------------------|---------------|---------------------------------------------------------------------|-----------------|
| 4-1               | 2581          | 0.0763                                                              | 0.0507          |
| 2-1               | 1106          | 0.0636                                                              | 0.0261          |
| 4-3               | 665           | 0.0972                                                              | 0.1003          |

Note = multiply by 2 ?? ( $\Delta Z$ )

FLIGHT #3

| Asc/desc | Rows                    | Decimal Time                  | median time                   |
|----------|-------------------------|-------------------------------|-------------------------------|
| 1        | 1 $\rightarrow$ 712     | 15.6833 $\rightarrow$ 15.9378 | 15.811 $\rightarrow$ 15:48:40 |
| 2        | 713 $\rightarrow$ 1201  | 15.9381 $\rightarrow$ 16.1167 | 16.027 16:01:37               |
| 3        | 1202 $\rightarrow$ 1691 | 16.1172 $\rightarrow$ 16.2908 | 16.204 16:12:14               |
| 4        | 1692 $\rightarrow$ 2180 | 16.2911 $\rightarrow$ 16.4569 | 16.374 16:22:26               |

| $\Delta$ asc/desc | $\Delta t$           | $\Sigma F(185m) \text{ } \mu\text{g } \mu\text{m}^2 \text{ s}^{-1}$ |                      |
|-------------------|----------------------|---------------------------------------------------------------------|----------------------|
| 4-1               | <del>2027</del> 2027 | 0.0436                                                              | } Positive<br>Fluxes |
| 2-1               | 778                  | 0.0129                                                              |                      |
| 4-3               | 612                  | 0.0847                                                              |                      |

Look at as fnc. of  $Z$ .

11/15/02 OLD DISJUNCT sampler  
 Hook up ANALOG signal  
 Red - #4 on DAC Breakout (Hi)  
 WHT - #5 " " (Hi)  
 BLK - #9



11/21/02 - List of things to DO

### AT TOWER/TRAILER:

- ① ~~Take up~~ ~~con standards~~ (for Diane to ~~obtain~~ up)
- ② ~~Calibrate~~ ~~Diane's standard~~
- ③ ~~Backup~~ ~~laptop~~ (Get most recent data)
- ④ ~~Download~~ ~~Jeitun data~~ ~~logger~~
- ⑤ ~~At least 1 more~~ ~~Secol~~ ~~target~~
- ⑥ ~~Take up~~ ~~thermometer~~ - put back up
- ⑦ Duck: a) add another direct channel  
b) ~~rearrange~~ ~~for the~~ ~~1 the channels~~  
c) loopback tests  $\Rightarrow$  (Need to consult w/ Gordon)
- ⑧ Troubleshoot heat flux plates  $\Rightarrow$  why are some bad??

calibrate  
in the  
field

⊗ Bring down  
big pickup (sled)

### CU Lab:

- ① Buy new Vaisala RH/T sensor
- ② Make some graphs of ATI problems - take to ATI
- ③ ~~Check some~~ ~~2um~~ ~~inter~~ ~~filters~~
- ④ Make new batch of Secol targets

### Logger data

- ① ~~After trailer laptop backup~~  $\Rightarrow$  get data all on 1 computer  
& ~~burn several~~ ~~CDs~~ ~~of~~ ~~data~~ ~~on~~ ~~it~~.
- ⊗ ~~Also~~ ~~get~~ ~~zip~~ ~~disks~~ ~~from~~ ~~CU~~
- ✓ ② Write code to convert profiler ~~data~~ into Splos  
(\*need no figure out calibrations)
- ③ Get ~~Splos~~, tower data for October  $\Rightarrow$  fill in gaps, ~~MISSA~~

diffg  
monthly recap  
logger info  
monthly 9

### Gap-filling

- ① ~~Get~~ ~~NSE relationships~~ ~~at~~ ~~PRD~~ ~~temp.~~ (Need to re-analyze the data & keep night-time stuff)
- ② ~~At~~ ~~2m~~ ~~relationships~~ ~~for~~ ~~October~~
- ③ Put ~~Sept~~ ~~data~~ ~~into~~ ~~1~~ ~~file~~ ~~(s.net, s.data)~~  $\Rightarrow$  ~~then~~ ~~run~~  
 $\Rightarrow$  ~~now~~ ~~needle~~ ~~storage~~ ~~for~~ ~~Sept.~~  $\Rightarrow$  ~~then~~ ~~run~~ ~~monthly~~ ~~filler~~
- ④ Run monthly view to see how well we did (All months - bill)
- ⑤ ~~finally~~ ~~start~~ ~~gap~~ ~~fill~~
- ⑥ Need ~~at~~ ~~filter~~ ~~for~~ ~~2nd~~ ~~half~~ ~~of~~ ~~year~~ (need Oct. data)
- ⑦ THEN start running gap-filler  
(can already start for last winter)

DISTINCT samples

- ① ~~fix to be wiring~~
- ② Test extra  $\alpha$ -value
- ③ TEST ① FLUSHING OF SYSTEM - use the L5800 gashound // ~~DID SOME NEED TO ANALYZE~~  
 $\rightarrow$  ~~Need to read Analog channels at 10 Hz & CO<sub>2</sub> standard~~
- ④ Test ② - Fill cans w/ accumulator  
 (flow bug / flow rates, etc.)  
 Test for CO<sub>2</sub> (should I bring my Scott-Martin std. down?)
- ⑤ THEN move to isoprene std. (should have new pump by then)
- ⑥  $\Rightarrow$  move to a roof somewhere - ~~to~~ to  
 will need to do EC & CO<sub>2</sub>

can also try  
cartridges

Balloon

- ① SEND Jim some figures from NR
- ② Talk to Ned about his system (left message)
- ③ Set up meeting w/ Roger, Jim, Ned, etc.
- ④ Talk to Eliot about CH<sub>2</sub>I<sub>2</sub> methodology (Get  
 cartridges - GC/ms)

TRACE GAS FLUXES

- ① ~~no~~ make text file of Detlev's data files
- ② ~~rewrite code to read in Aster files~~
- ③ ~~Get Detlev's calibration~~
- ④ Start churning thru Detlev's data
- ⑤ ~~Go back & look at CO data again - Is there a flux?~~  
 $\rightarrow$  CONCENTRATION data
- ⑥ ~~NO<sub>2</sub> & TALK TO Ted about his plans~~

input / output  
about / structure

Need calibration  
NO

Other

- ① ~~Benefits~~ NCAR
- ② ~~Site location~~ - CU ~~there is still~~
- ③ ~~Send reprint out~~
- ④ Rewrite profiler code
- ⑤ UC fluxes for Sept 11-20
- ⑥ "mode" in ASTER setup (Gordon)
- ⑦ despiker in Splus (Gordon)
- ⑧ Get NCAR computer setup (back up old one)  $\Rightarrow$  Dec. 12+L

⑨ NCAR 5-year plan  
weekend

TALK TO TURN IN

11/22/02 At site

- ① Downloaded Jettens logger
- ② Bill reported no recent of  $N_2$  in 2 weeks - maybe a leak  
I leak tested  $N_2$  lines - found only 1 small leak  
Bill reported 1100 psi yesterday - it was running at  
1000 psi today - seems like a leak. SHOULD RETHINK  
PLACES TO CHECK (valves?)
- ③ Downloaded CC. wind 23x  $\Rightarrow$  something had screwed  
up - the date was messed up  
Actual date - 11/22 12:07:30  
Reading - 9/13/05 10:09:30  
Reset timed downloaded

- ④ Put channel 204 into Port J on USB hub

## — Calibrated Dean's Standard

| Run               | FLAP | SPAN  |     | V    | sample |     |      | ECG27   |
|-------------------|------|-------|-----|------|--------|-----|------|---------|
|                   | Zero | T     | P   |      | T      | P   | V    |         |
| 1                 | 0    | 20.89 | 784 | 1380 | 20.99  | 785 | 1506 | 388.47  |
| 2                 | 0    | 21.10 | 784 | 1380 | 21.23  | 785 | 1508 | 389.50  |
| 3                 | 0    | 21.44 | 785 | 1379 | 21.52  | 785 | 1507 | 389.53  |
| 4                 | 0    | 21.66 | 785 | 1378 | 21.77  | 783 | 1506 | 389.74  |
| 5                 | 0    | 21.96 | 785 | 1377 | 22.01  | 783 | 1506 | 390.05  |
| 6                 | 0    | 22.26 | 782 | 1375 | 22.30  | 782 | 1506 | 390.565 |
| (*) Adjusted span |      |       |     |      | 22.37  |     | 1502 | 389.24  |

## Current logger Program

| Channel               | NAME          | PROGRAM       |
|-----------------------|---------------|---------------|
| 204 $\rightarrow$ 209 | 23x wind      | twosonic.dld  |
| 207                   | NCARTc        | NCARTc.dld    |
| dend10x               | dend10x       | DEND10x.dld   |
| - GLO 206 -           |               | 21sonic.dld   |
| 23x UCAN              | Peter Bunker  | FLR232-5.dld  |
| 23x TCs               | 23x TC        | TC23x B.dld   |
| 23x SOIL              | 23x SOIL      | Soil23x B.dld |
| 201                   | 23x fast      | Fast23x7.dld  |
| 205                   | 23x rad       | CNR30.dld     |
| CR10 MRS              | SNOW profiles | MRSTEMP.dld   |

203  
21x dend  
CR10X/1  
202

23x prot  
21x dend  
CR10X/1  
23x met

PROF30B.dld  
DENDRO.dld  
PROF4TB.dld  
met30D.dld

13:48 - Switched channel 204 to channel 200  
got rid of ATI channel for time being  
(in ARCHIVE, covers channel configs too)

2:30 - New Sected target

- more leak checks on EC system - some valve tightened + appeared to seal.
- Changed dessicant in prefilter
- checked new w/ heat flux plates - ALL seemed to be reading 0.00 mV (expected)
- Need to bring out laptop & see what's going on
- marked N<sub>2</sub> regulator

⊗ on Orquell - need to change ops.config  
for find.loggers.g

12/1/02 - L800 ANALOG output -  
what is the scale?

|          |   |        |
|----------|---|--------|
| 445 ppm  | - | 2.10 V |
| 356 ppm  |   | 1.69 V |
| 1000 ppm |   | 4.77 V |



DESA.VI

save w/ options - Development Distribution

saves all associated v's

creates lib  $\Rightarrow$  library of bundled v's  
(All one's used by DESA.VI)

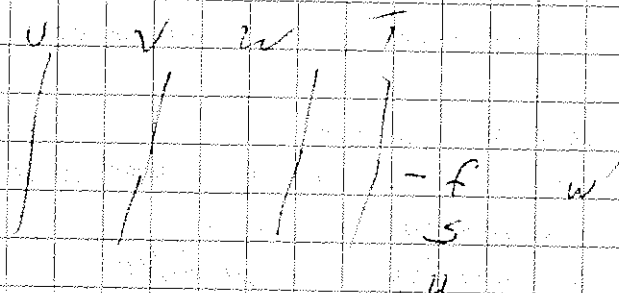

12/1/02 Eiko modified DESA TO save Flow, Pressure & ANALOG  
CHANNELS ~~STOP~~

ANALOG Set-up

|      |   |   |   |                                      |
|------|---|---|---|--------------------------------------|
| ACH0 | - | 1 | - | Flow                                 |
| ACH1 | - | 2 | - | Pressure (cell)                      |
| ACH2 | - | 3 | - | P2                                   |
| ACH3 | - | 4 | - | P3                                   |
| ACH4 | - | 5 | - | ANALOG 1 $\Rightarrow$ L/COR 800 now |
| ACH5 | - | 6 | - | Analog 2                             |
| ACH6 | - | 7 | - | Analog 3                             |
| ACH7 | - | 8 | - | Analog 4                             |

output

IN file  $\Rightarrow$  ADDS, Flow, Pressure, A1, A2, A3, A4 ~~to~~ 10 Hz

TTAG, U, V, W, Tc, Flow, P, A1, A2, A3, A4 (DESA FLOWS)

1 2 3 4 5

SOME FLOW TESTSusing Peter's standard - 352 ppm in N<sub>2</sub>

Flush time = 10 sec

Sample time = 20 sec DEC mode

11:30 - Started sample (w/ room air)  
 ~ 11:34 - Turned on Peter's standard

| Time                             | T <sub>flush</sub> | T <sub>sample</sub> | Flow                        |
|----------------------------------|--------------------|---------------------|-----------------------------|
| 11:30                            | 10                 | 20                  | 200 (2.0)                   |
| 11:42                            | "                  | "                   | 100 (1.0)                   |
| 11:44                            | 15                 | 15                  | 100 (1.0)                   |
| 11:47                            | 15                 | 15                  | 150 (1.5)                   |
| 11:50                            | "                  | "                   | 200 (2.0)                   |
| 11:53                            | "                  | "                   | 250 (2.5)                   |
| 11:56                            | "                  | "                   | 300 (3.0)                   |
| 11:59 - 12:00                    | 11                 | 11                  | 400 (4.0)                   |
| <del>12:00 - 12:05 = lunch</del> |                    |                     |                             |
| 12:00                            | "                  | "                   | 400 <del>(4.0)</del> (4.05) |
| 12:03                            | "                  | "                   | 500 5.0 ctrl off            |

12:06 - stopped

Lost file - (opened file while still collecting)

— DO same thing over — — using KNF Blue pump —

|      |    |    |                          |
|------|----|----|--------------------------|
| 2:00 | 15 | 15 | 200 (2.0)                |
| 2:05 | "  | "  | 100 (1.0)                |
| 2:08 | "  | "  | 150 (1.5)                |
| 2:10 | "  | "  | 200 (2.0)                |
| 2:12 | "  | "  | 250 (2.5)                |
| 2:14 | "  | "  | 300 (3.0)                |
| 2:16 | "  | "  | 350 (3.5)                |
| 2:19 | "  | "  | 400 (4.0)                |
| 2:20 | "  | "  | 450 (4.5)                |
| 2:24 |    |    | <del>300</del> 250 (2.5) |

⊗ Pump starts to lose it  
 can't maintain flow for 15 sec.  
 → Decays to zero lock a bit  
 funny - probably something  
 to do w/ soda line trap

⊗ Note - select mode DEC or DEA Before running v.  
 otherwise it can get its brain scrambled

Put in a long piece of connecting tubing ( $\frac{1}{8}$ " o.d.) 84.25" long  
old piece =  $4\frac{1}{2}$ "

Put in place at 2:29 PM - Repeat last test

TUBING i.d. =

| (B) | Time | $T_{\text{cush}}$ | $T_{\text{sample}}$ | Flow               |       |
|-----|------|-------------------|---------------------|--------------------|-------|
|     | 2:30 | 15                | 15                  | 250                | (2.5) |
|     | 2:33 | "                 | "                   | 100                |       |
|     | 2:36 | "                 | "                   | 150                |       |
|     | 2:39 | "                 | "                   | 200                |       |
|     | 2:43 | "                 | "                   | 300                | (3.0) |
|     | 2:46 | "                 | "                   | <del>300</del> 400 |       |
|     | 2:49 |                   |                     | 250                |       |

Pump off

Using FIS pump // Long tubing  
started

| (C) | Time |   |   | Flow |                                 |
|-----|------|---|---|------|---------------------------------|
|     | 3:04 | " | " | 250  | } Pump looks bad -<br>leaking!! |
|     | 3:08 | " | " | 100  |                                 |
|     | 3:10 | " | " | 400  |                                 |
|     | 3:16 |   |   | 300  |                                 |

↳ Turned off

N79 pump + Long tubing

| (D) | Time |   |   | Flow               |                                                |
|-----|------|---|---|--------------------|------------------------------------------------|
|     | 3:30 | " | " | 200                |                                                |
|     | 3:33 | " | " | 100                |                                                |
|     | 3:36 | " | " | 300                |                                                |
|     | 3:39 | " | " | 400                | ⇒ losing it - but not as bad<br>as 1" KNF pump |
|     | 3:42 | " | " | <del>450</del> 500 |                                                |

3:45 > put in short tubing

|  | Time | Flow |
|--|------|------|
|  | 3:47 | 200  |
|  | 3:49 | 100  |
|  | 3:52 | 300  |
|  | 3:54 | 400  |

12/6 At site

- ① Turned off fast O<sub>3</sub> (too windy to bring down)  
~11:30 AM
- ② Tried loopback test - didn't recognize command ??  
Restarted data - new UC wind looks OK (~10 Hz)
- ③ Downloaded wind loggers - Bill said he had trouble, but went fine for me - did take a while to connect.
- ④ Looked at heat flux plates - No resistance on leads of real plates. Good plates do have contact - likely cables got eaten - need to trace down & reconnect.

New cal tank

ASG-A

| RUN | Zero | Span<br>T | P   | V      | Sample<br>T | P   | V           | Ecarr  |
|-----|------|-----------|-----|--------|-------------|-----|-------------|--------|
| 1   | 0    | 17.07     | 757 | 1386 ✓ | 17.17       | 758 | 1586        | 414.74 |
| 2   | 0    | 17.45     | 758 | 1385 ✓ | 17.52       | 757 | 1583        | 414.27 |
| 3   | 0    | 17.92     | 757 | 1383 ✓ | 17.96       | 757 | 1583 (1453) | 414.89 |
| 4   | 0    | 18.23     | 758 | 1382 ✓ | 18.36       | 757 | 1583        | 415.46 |
| 5   | 0    | 18.71     | 758 | 1380 ✓ | 18.76       | 757 | 1582        | 415.70 |
| 6   | 0    | 19.12     | 758 | 1379   | 19.21       | 757 | 1583 (?)    | 416.68 |

415.0 ± 0.6  
PPM



12/9/02 To Do ListAt Tower -

- ① ~~Replace  $N_2$  (Bill)~~ Keep check on  $N_2$
- ② Duck - still do loopback tests - email Gordon again
- ③ Trace lines of heat flux plates & reconnect. (Bill)
- ④ ~~New Insignificant traps~~

(calibrate other standards)

In Lab

- ① ~~Place new designed traps~~
- ② ~~Trace filters to site~~
- ③ Get more cylinders up to site
- ④ New batch of sealed targets
- ⑤ New RFT sensor
- ⑥ Graph of  $AT$  soil profile to  $AT$

Logger data

- ① ~~Sort data for new~~
- ② ~~Logger data to MMS~~

Co - filling - ~~IF Bill finished up as they visit ->~~

① Start running graph/see 2.5 => Do we need to rerun??

\* ② ~~Make new data for table~~

③ Clean up last bit of data (see how data in Sept. Oct.?)  
=> Look at Oct & Sept soil heat flux => put in replaced values

Miscellaneous

- ① Rewrite probe code
- ② Uffens Sept 10-20
- ③ "make" in ASTER
- ④ despike in Spis
- > ⑤ Responses to Paper Review (talked to Russ)
- ⑥ Make some drawings of system  
Es. Sean
- ⑦ ~~Geology review~~
- ⑧ CO<sub>2</sub> conc. to Sean // Also 5-min. temperatures

NCAR projectsDESH

- monday
- ① ~~analyze D. Form for data I took~~
  - ② Test extra valve
  - ③ Use Accumulator to fill cans - (test for  $CO_2$ ) need to do
  - ④ Then move to isoprene - a) cans // Jim w/ GC/MS  
b) cartridges
  - ⑤ Move to roof ??  
↳ somewhere to measure a flux of  $CO_2$  or  $H_2O$
  - ⑥ Run variants of disjunct sampling code

Balloon

- ① Keep up w/ Jim/Roger
- ② Talk to Ned
- ③ Talk to Ewert about  $CH_2I_2$
- ④ Jim  $\Rightarrow$  GC/MS

 $O_3/NO_x/CO$ 

- ① Need Teresa's calc's to estimate flux detection limit
- ② ~~Make graphs up for  $NO_x$  (send to him)~~  
~~that problem is fixed~~
- ③ Keep up w/ Ted about  $NO_y$  sensor
- ④ Ask Ted about PAN uptake w/ coiflers
- ④ Greg Harey // Duke
- ⑤ Make Drawing of possible  $NO_y$  inlet  
(Talk to Frank Facke / Brian Ridley)

Bad Heat Flux plates are:

- |    |     |                 |
|----|-----|-----------------|
| 3  | (H) | #3, 4, 5, 8, 10 |
| 4  | (V) |                 |
| 5  | (V) |                 |
| 8  | (H) |                 |
| 10 | (H) |                 |

Good ones are

- |   |   |
|---|---|
| 1 | V |
| 2 | V |
| 6 | H |
| 7 | V |
| 9 | V |

More heat flux stuff = when did they go bad

June

OK

July

#5 went bad - no need to replace -

Aug

#3 went bad ~ Aug 29. #8 went bad ~ Aug 174h  $\Rightarrow$  will need  
 $\hookrightarrow$  #10 went bad ~ Aug 20

Sep

Oct

Nov.

Bad

To  
Substitute  
here

(or throw these  
out)

## 12/11/02 ANALYZING Flow DATA on DISTINCT sampler

Group (A)

$\rightarrow$  Time between valve switch + start of  $CO_2$

$\rightarrow$  Exp. Time constant for decay/growth

| Time  | Flow RATE                | (F <sub>0</sub> s) | F <sub>0</sub> /smp | T <sub>long</sub> (s) | T <sub>exp</sub> (s) | Full state flush |
|-------|--------------------------|--------------------|---------------------|-----------------------|----------------------|------------------|
| 00:03 | <del>203.76</del> 203.76 | S $\rightarrow$ F  |                     | 2.1                   | rows                 | 5.8 sec          |
|       | 198.03                   | F $\rightarrow$ S  | 2.5                 | <del>2.5</del> (238)  |                      | 5.6 s            |
|       | 201.95                   | S $\rightarrow$ F  |                     | 2.5                   | (293)                | 5.5 s            |
|       | 198.02                   | F $\rightarrow$ S  |                     | 2.5                   | (138)                | 5.2 s            |
| 01:01 | 201.98                   | S $\rightarrow$ F  |                     | 2.5                   | (583)                | 5.6 s            |
|       | 198.06                   | F $\rightarrow$ S  |                     | 2.5                   | (728)                | 5.5 s            |
|       | 202.0                    | S $\rightarrow$ F  |                     | 2.5                   | (873)                | 5.2 s            |
|       | 198.1                    | F $\rightarrow$ S  |                     | 2.6                   | (1018)               | 5.7 s            |
|       | 202.40                   | S $\rightarrow$ F  |                     | 2.6                   | (1163)               | 5.7 s            |
| 2:28  | 198.08                   | F $\rightarrow$ S  |                     | 2.5                   | (1309)               | 5.6 s            |
| 5:22  | 99.92                    | S $\rightarrow$ F  |                     | 3.9                   | (1)                  | 9.1 s            |
|       | 99.79                    | F $\rightarrow$ S  |                     | 3.7                   | (146)                | 8.7 s            |
|       | 100.42                   | S $\rightarrow$ F  |                     | 3.7                   | (288)                | 8.9 s            |
|       | 99.69                    | F $\rightarrow$ S  |                     | 3.7                   | (434)                | 8.9 s            |
|       | 100.52                   | S $\rightarrow$ F  |                     | 3.7                   | (579)                | 8.9 s            |
|       | 99.73                    | F $\rightarrow$ S  |                     | 3.7                   | (724)                | 8.9 s            |
| 8:16  | 150.66                   | S $\rightarrow$ F  |                     | 3.0                   | (1)                  | 7.1 s            |
|       | 149.12                   | F $\rightarrow$ S  |                     | 2.9                   | (1468)               | 6.5 s            |
|       | 150.65                   | S $\rightarrow$ F  |                     | 2.8                   | (292)                | 7.0              |
|       | 149.15                   | F $\rightarrow$ S  |                     | 2.9                   | (437)                | 6.5              |
|       | 150.65                   | S $\rightarrow$ F  |                     | 2.9                   | (582)                | 6.8              |
|       | 149.16                   | F $\rightarrow$ S  |                     | 3.0                   | (727)                | 6.5              |
| 10:27 | 198.40                   | S $\rightarrow$ F  |                     | 2.6                   | (1)                  | 5.2              |
|       | 201.79                   | F $\rightarrow$ S  |                     | 2.5                   | (146)                | 5.6              |
|       | 198.16                   | S $\rightarrow$ F  |                     | 2.5                   | (291)                | 5.1              |

1.53

1.47

⊗ Note looks like Li80 updates every ~0.3 sec

case/decay

Reaches 95% of final value

| Time  | Flow   | F/S | $T_{lag}$              | $T_{exp}$   | $T$ (Full scale) |
|-------|--------|-----|------------------------|-------------|------------------|
| 12.23 | 246.10 | F→S | 2.7 (1)                |             | 4.3              |
|       | 254.27 | S→F | 2.1 (146)              |             | 5.2              |
|       | 246.08 | F→S | 2.1 (129)              |             | 4.2              |
|       | 254.20 | S→F | 2.2 (136)              |             | 4.7              |
|       | 246.06 | F→S | 2.2 (581)              |             | 4.2              |
|       | 254.23 | S→F | 1.7 (726)              |             | 4.8              |
|       | 246.09 | F→S | 2.2 (871)              |             | 4.3              |
| 12.19 | 271.21 | F→S | 2.3 (1)                | 1.45<br>.35 | 3.8              |
|       | 310.82 | S→F | 1.7 (146)              |             | 4.3              |
|       | 290.07 | F→S | 2.2 (231)              |             | 3.3              |
|       | 310.72 | S→F | 1.7 (436)              |             | 3.8              |
|       | 290.75 | F→S | 2.3 (581)              |             | 3.3              |
|       | 310.66 | S→F | 1.3 (726)              |             | 2.8              |
|       | 290.79 | F→S | 1.8 <del>2</del> (871) |             | 3.4              |
|       | 310.68 | S→F | 1.3 (1016)             |             | 2.9              |
| 12.30 | 353.49 | S→F | 1.5 (1)                |             | 3.6 ⇒ Pump??     |
|       | 320.68 | F→S | 1.9 (146)              |             | 3.0              |
|       | 353.00 | S→F | 1.4 (291)              |             | 3.5              |
|       | 320.05 | F→S | 1.9 (437)              |             | 2.9              |
|       | 353.81 | S→F | 1.4 (582)              |             | 3.5              |
|       | 320.05 | F→S | 1.9 (727)              |             | 3.0              |
|       | 353.90 | S→F | 1.4 (872)              |             | 3.5              |
|       | 320.46 | F→S | 2.0 (1017)             |             | 3.0              |

likely empties the trap (w/ CO<sub>2</sub> completely scrubbed) -



Still - 6-cup (4)

brothers @ vgs/500

| Time    | Flow   | F/S              | $T_{lag}$       | $T_{exp}$ | $T$ (Full scale) | Flow settling time $\approx 2.7s$ |
|---------|--------|------------------|-----------------|-----------|------------------|-----------------------------------|
| 1:19:24 | 400.04 | S→F              | 1.2 (1)         |           | - pump -         | (*) ~2.7s                         |
|         | 330.34 | F→S              | 1.6 (146)       |           | 2.7              |                                   |
|         | 400.11 | S→F              | 1.5 (292)       |           | 3.6 (pump)       |                                   |
|         | 331.75 | F→S              | 1.6 (437)       |           | 2.6              |                                   |
| ✓       | 400.06 | S→F              | 1.6 (582)       |           | 3.6 (pump)       |                                   |
|         | 331.62 | F→S              | 1.6 (727)       |           | 2.7              |                                   |
|         | 400.03 | S→F              | 1.1 (1.7) (872) |           | 3.2              |                                   |
|         | 331.48 | F→S              | 1.7 (1017)      |           | 2.7              |                                   |
| 1:21:31 | 336.62 | <del>S</del> F→S | 1.8 (1)         |           | 2.4              |                                   |
|         | 450.73 | <del>S</del> S→F | 1.2 (146)       |           | 3.3              | pump - larger                     |
|         | 335.7  | <del>S</del> F→S | 1.3 (289)       |           | 2.3              | higher zero                       |
| ✓       | 450.20 | <del>S</del> S→F | 1.3 (434)       |           | —                | signal                            |
|         | 335.79 | <del>S</del> F→S | 1.2 (580)       |           | 2.3              |                                   |
|         | 450.40 | S→F              | 1.2 (725)       |           | —                |                                   |
| (*)     | 335.6  | F→S              | 1.3 (870)       |           | 2.3              |                                   |

These appear to be sampling 0.5 sec (rate on Li800)

(B)

| Time  | Flow   | F/S | $T_{lag}$  | $T_{exp}$ | $T$ Full scale |
|-------|--------|-----|------------|-----------|----------------|
| 30:02 | 254.7  | S→F | 2.8 (1)    |           | 5.4 (1.38)     |
|       | 245.9  | F→S | 2.7 (146)  |           | 4.8 (1.58)     |
|       | 254.6  | S→F | 2.7 (291)  |           | 5.3 (1.39)     |
|       | 245.8  | F→S | 2.7 (436)  |           | 4.8 (1.6)      |
| 33:25 | 99.96  | S→F | 5.0 (2032) |           | 9.2 (1.39)     |
|       | 99.84  | F→S | 5.0 (2177) |           | 9.7 (1.5)      |
| ✓     | 99.72  | S→F | 5.0 (2323) |           | 9.1            |
|       | 100.39 | S→F | 4.9 (2614) |           | 9.1 (1.39)     |
|       | 99.75  | F→S | 4.9 (2759) |           | 9.6            |
| 36:20 | 150.72 | S→F | 4.1 (3772) |           | 7.2 (1.33)     |
|       | 149.2  | F→S | 4.0 (3918) |           | 7.1 (1.5)      |
|       | 150.71 | S→F | 4.0 (4063) |           | 7.1 (1.34)     |
|       | 149.16 | F→S | 4.1 (4208) |           | 7.2 (1.56)     |
| 39:14 | 201.97 | S→F | 3.3 (5513) |           | 5.8 (1.37)     |
|       | 197.94 | F→S | 3.2 (5659) |           | 5.3 (1.31)     |
| ✓     | 202.23 | S→F | 3.2 (5804) |           | 5.3 (1.45)     |
|       | 197.98 | F→S | 3.2 (5949) |           | 5.3 (1.5)      |

(\*) missed a S/F flag line -

CONTINUED

| Time  | Flow   | F/S | T <sub>log</sub>            | T <sub>exp</sub> | T <sub>cell scale</sub> |                   |
|-------|--------|-----|-----------------------------|------------------|-------------------------|-------------------|
| 13:20 | 295.11 | F→S | 2.5 (7980)                  |                  | 3.5 (1.5)               | 49=0              |
|       | 326.9  | S→F | 2.0 (8125)                  |                  | 4.0 (.55)               |                   |
|       | 295.08 | F→S | 2.0 (8270)                  |                  | 3.6                     |                   |
| ✓     | 326.64 | S→F | 2.0 (8415)                  |                  | 4.1 (.55)               |                   |
| 16:15 | 384.3  | F→S | 1.6 (8720)                  |                  | 2.7                     |                   |
|       | 433.13 | S→F | 1.7 (9866)                  |                  | 2.7 (1.66→hump)         |                   |
| ✓     | 383.44 | F→S | 1.7 (10011)                 |                  | 2.7                     |                   |
|       | 433.12 | S→F | 1.7 (10156)                 |                  | 2.8 (on hump)           |                   |
| <hr/> |        |     |                             |                  |                         |                   |
| 0:07  | 202.05 | S→F | 4.2 (1)                     |                  | 7.8 (365)               |                   |
| ✓     | 199.01 | F→S | 4.1 (146)                   |                  | 7.8 (1.5)               |                   |
|       | 201.91 | S→F | 4.2 (291)                   |                  | 7.8 (2.4)               |                   |
|       | 199.02 | F→S | 4.2 (436)                   |                  | 7.8                     |                   |
| 33:11 | 99.68  | F→S | 7.2 - <del>3.2</del> (1887) |                  | 12.6                    |                   |
|       | 100.59 | S→F | 7.0 (2032)                  |                  | 13.1 (<0.4)             |                   |
| ✓     | 99.73  | F→S | 6.9 (2178)                  |                  | 12.6                    |                   |
|       | 100.80 | S→F | 7.0 (2322)                  |                  | 13.2                    |                   |
| 36:20 | 301.82 | S→F | 3.0 (3773)                  |                  | 5.6                     |                   |
|       | 297.52 | F→S | 3.0 (3918)                  |                  | 5.6                     |                   |
| ✓     | 304.80 | S→F | 2.6 - 3.0 (4063)            |                  | 5.7                     |                   |
|       | 297.56 | F→S | 3.1 (4208)                  |                  | 5.7                     |                   |
| 39:43 | 411.07 | S→F | 1.7 (5804)                  |                  | 3.3 (hump)              |                   |
| ✓     | 393.3  | F→S | 2.3 (5549)                  |                  | 3.8                     |                   |
|       | 414.60 | S→F | 1.8 (6094)                  |                  | 2.8 (hump)              | 100pt<br>Avg Flow |
|       | 393.29 | F→S | 2.2 (6240)                  |                  | 3.8                     |                   |
| <hr/> |        |     |                             |                  |                         |                   |
| 2:22  | 434.33 | F→S | 1.4 (7400)                  |                  | 1.9                     |                   |
|       | 461.46 | S→F | 1.4 (7545)                  |                  | 2.5 (hump)              |                   |
|       | 433.93 | F→S | 1.5 (7690)                  |                  | 2.0                     |                   |
|       | 463.33 | S→F | 1.5 (7835)                  |                  | 2.5                     |                   |
| 46:56 | 201.80 | S→F | 3.8 (10153)                 |                  | 2.4 (<.4)               |                   |
| ✓     | 199.10 | F→S | <del>3.8</del> 3.8 (10302)  |                  | 2.4                     |                   |
|       | 201.83 | S→F | 3.8 (10447)                 |                  | 2.5                     |                   |
|       | 199.09 | F→S | 3.8 (10592)                 |                  | 2.5                     |                   |
| 49:23 | 100.17 | S→F | (5.9) 6.4 (11609)           |                  | 12.1                    |                   |
|       | 89.85  | F→S | 6.5 (11754)                 |                  | 12.2                    |                   |
| ✓     | 100.73 | S→F | 6.5 (11899)                 |                  | 12.2                    |                   |
|       | 89.73  | F→S | 6.5 (12044)                 |                  | 12.2                    |                   |

continued

| Time     | Flow   | Tag         | Temp | Temp scale | F/S |
|----------|--------|-------------|------|------------|-----|
| 15:52:17 | 303.88 | 2.5 (13350) |      | 5.1 (<0.4) | S→F |
|          | 297.85 | 2.5 (13495) |      | 5.1        | F→S |
|          | 304.34 | 2.4 (13641) |      | 5.6        | S→F |
|          | 297.85 | 2.6 (13785) |      | 5.2        | F→S |
| 15:54:28 | 395.05 | 2.1 (14656) |      | 3.1        | F→S |
|          | 412.11 | 1.6 (14801) |      | 2.6 (hump) | S→F |
|          | 394.03 | 2.2 (14946) |      | 3.2        | F→S |
|          | 412.53 | 1.7 (15091) |      | 2.7 (hump) | S→F |

SYNTH

Flow

100

150

| Flow (sccm) | Long/short | F/S trans. | pump | t lag | t exp | t full scale |
|-------------|------------|------------|------|-------|-------|--------------|
| 100 S       |            | both       | A    | 3.7   |       | 8.9          |
| L           |            | both       | A    | 5     |       | 9.3          |
| S           |            | both       | B    | 6.4   |       | 12.2         |
| L           |            | both       | B    | 7     |       | 12.9         |
| 150 S       |            | both       | A    | 2.9   |       | 6.7          |
| L           |            | both       | A    | 4     |       | 7.1          |
| 200 S       |            | both       | A    | 2.5   |       | 5.5          |
| L           |            | both       | A    | 3.3   |       | 5.5          |
| S           |            | both       | B    | 3.8   |       | 7.4          |
| L           |            | both       | B    | 4.1   |       | 7.8          |
| 250 S       |            | both       | A    | 2.2   |       | 4.5          |
| L           |            | both       | A    | 2.7   |       | 5.1          |
| 300 S       |            | F to S     | A    | 2.2   |       | 3.5          |
| S           |            | S to F     | A    | 1.7   |       | 3.5          |
| L           |            | F to S     | A    | 2     |       | 3.5          |
| L           |            | S to F     | A    | 2     |       | 4.1          |
| S           |            | both       | B    | 2.5   |       | 5.2          |
| L           |            | both       | B    | 4.2   |       | 7.8          |
| 350 S       |            | F to S     | A    | 1.9   |       | 3            |
|             |            | S to F     | A    | 1.4   |       | 3.5          |
| 400 S       |            | F to S     | A    | 1.6   |       | 2.6          |
| S           |            | S to F     | A    | 1.3   | n/a   |              |
| L           |            | both       | A    | 1.7   |       | 2.7          |
| S           |            | S to F     | B    | 1.6   | n/a   |              |
| S           |            | F to S     | B    | 2.1   |       | 3.2          |
| L           |            | S to F     | B    | 1.7   | n/a   |              |
| L           |            | F to S     | B    | 2.2   |       | 3.8          |
| 450 S       |            | S to F     | A    | 1.2   |       |              |
|             |            | F to S     | A    | 1.3   |       | 2.3          |
| L           |            | both       | B    | 1.4   |       | 2.3          |

A = KNF box

B = other

(A or B)

Pump

A

A

B

B

Pump A → KNF in box

B → other KNF

Extra tubing volume -

 $\frac{1}{8}$ " tubing by 84.25" long  
( $\frac{1}{16}$ " i.d.)

$d = 0.1588 \text{ cm}$

$r = 0.0794 \text{ cm}$

$A = 0.0198 \text{ cm}^2$

$L = 213.995 \text{ cm}$

$V = 4.237 \text{ cm}^3$

$T_R = \frac{V}{\text{Flow}}$

| Flow ( $\text{cm}^3/\text{min}$ ) | $T_{\text{res. (calc.)}}$ in $V = 4.237 \text{ cm}^3$ | $\Delta T_{\text{exp}}$ |
|-----------------------------------|-------------------------------------------------------|-------------------------|
| 100                               | 2.54 sec                                              | 1.3                     |
| 200                               | 1.27 sec                                              | 0.8                     |
| 300                               | 0.85 sec                                              | 0.3                     |
| 450                               | 0.56 sec                                              |                         |

Always smaller  
than calculated?  
(Is Area wrong?)

- No change - within time  
resolution of Hi800

$\Rightarrow$  ALSO - Full scale  $T$  doesn't change much w/ long tubing - suggests  
MAJOR lag may be due to flushing lines  $\Rightarrow$  not tube transit.  
(Need to look at  $T_{\text{exp}} \Rightarrow$  does it stay the same?)

12/16/02 Filling some cans w/ CO<sub>2</sub> (Accumulator mode)  
5 sec. flush, 4 sec purge, 20 sec sample 2L cans

| Time                             | UP CAN         | DN CAN         | Up            | Var           | Flow |
|----------------------------------|----------------|----------------|---------------|---------------|------|
| 14:00 (14:02) <sup>STARTED</sup> | BA1-204        | BA1-200        | 600 (30 min)  | 600 (30 min)  | 3.00 |
| 14:30 (14:35)                    | BA1-202        | BA1-210        | 785 (30 min)  | 765 (30 min)  |      |
|                                  |                |                | 711 (60 min)  | 1226 (60 min) |      |
| STARTED 15:55                    | <del>212</del> | <del>210</del> | 700 (90 min)  | 1226 (90 min) |      |
| 16:00 <del>(16:05)</del>         | 212            | 210            | 1255 (30 min) | 1785 (30 min) | 4.00 |
| Stopped at 16:40                 |                |                |               |               |      |

once filled up flow is dropping to zero

Assuming it is using last  $w_{\text{var}}$  to base its max. sample time on.

90 min sample won't well above 2L sample volume - pump still  
operating properly except on big samples - started to lock  
it!! (one at 3.53-3.54)

$\otimes \otimes \Rightarrow$  change last  $w_{\text{var}}$  to 0.5 (from 0.8)  
to get more sample

ALSO - fitting on  
diff CAN on 90 min  
sample was loose &  
sample was lost



12/20 To Do List

At tower/site

- ① Get more  $N_2$  to site = keep check on  $N_2$  - ~~is it working~~
- \* ② ~~Trace lines of heat flux sensors & splice back together~~ (Bill)
- ✓ ③ ~~put the hygrometer back up~~ (Bill)
- \* ④ Try loopback tests on Duck
- ⑤ Calibrate other standard at trailer ✓ ~~Download logs~~ (Bill)

CU-LAB

- ① More Sealed targets
  - ② Order new HMP 45D
  - ③ Fix ATI sonic
- Get Linux  
new RAM for old desktop

CU-DATA management

- ① Tigger input for Nov. (done already?)
- ② ~~look at finalized gap-filled data & then put on web~~
- ③ Calculate daily sums, etc.
- ④ UC Fluxes Sept 11-20

CU - for Sean

- ① send profiler data & temp. profiles to Sean
  - ② Draw some figures describing system (~~flow diagram~~)
    - a) tower diagram
    - b) other data diagram
    - c) DATA flow & ANALYSIS
- TABLE of loggers/locations  
& programs/channels

CU-Miscellaneous

- ① Rewrite profiler code
- ② from Gordon - "mode" in ASTER, Splus despike

Fast O<sub>3</sub>

- ① ~~meet w/ Deller JAN 14, 9:00-9:30~~
- ② ~~Exp. fits of targets - look at residuals vs. met conditions~~
- ③ Figure out how to do spectral corrections (Rubinet paper)
- ④ How to figure out  $H_2O$  interference??

Nov

- ① Make drawing of hypothetical Master Blaster STARTED  
(Ask Ted about PAN  
UPTAKE of confifers)

CO

- ① Get cal. concentrations from Teresa Campos

Disjunct Sampler~~(1) Measure  $CO_2$  in cans~~AND decay on flow DATA  
→ somewhere!

(2) Look at simulations - did they work?

(3) Fill some cans w/ isoprene  $\Rightarrow$  measure on GC/MS (learn from Jim) $\hookrightarrow$  maybe cartridges too(4)  $\Rightarrow$  Pump issue - talk to Eiko

(5) Test on ROOF somewhere (February?)

 $\hookrightarrow$  FRIDAY

MONDAY

Balloon(1) Talk to J. & Eiko about ~~CH<sub>2</sub> methodology~~ set up meeting

(2) see what status of balloon sends is - Jim will need this for Mexico City

PAPERS

## I. Review Response -

(1) ~~Can we get electronic version of comments (scanner)~~ $\Rightarrow$  THEN write responses & send to Ross, Peter & Dean(2) ~~Get copy of Eiko's comments to Dean~~(3) ~~Wind speed comparisons  $\Rightarrow$  how to incorporate~~(4) ~~Planar fit vs.  $u^*$  (have already done vs.  $z/L$ )~~✓ (5) ~~Make table of sensors & measurement heights~~(6) Eiko - comments - look at  $u_z/u_0$  vs.  $u^*$  for other heights (9m, 16m)  
2.5m, 26m $\hookrightarrow$  (But below the displacement height) $\hookrightarrow$  look at tilt errors for standard error? (NO)- stationarity of  $\bar{u}$  over 120 min $\hookrightarrow$  independent of  $u^*$  = just decays exponentially

## II. (1) Put in Peter's comments

(2) Put in Dean's comments

(3) Long  $\rightarrow$  2 hr co-spectra of upslopes vs. downslopesRecommendations  $\hookleftarrow$  (4) Figure out how to ~~figure out~~ if look for night-time waves  
(spectral analysis - look at power spectrum peaks (or co-spectra peaks))

(5) Get website from Peter to try &amp; look at some specific weather patterns on different days

CAN we incorporate some of Finnigan's stuff

look at  $\bar{u}^2$  for upslopes/downslopes

10

12/23/02 ANALYZING CO<sub>2</sub> IN CANS FROM ~~12/16~~ DESA TEST  
ON 12/16

|                                                                                    | CAN # | up/dn | [CO <sub>2</sub> ] | Voltage              | Time                 |
|------------------------------------------------------------------------------------|-------|-------|--------------------|----------------------|----------------------|
| 100<br>CW<br>Pressure<br>↓<br>Screwed up<br>200<br>RY 204W7 EMPTY<br>CAN AS VACUUM | 200   |       |                    |                      | 2:00 <sup>port</sup> |
|                                                                                    | 204   |       |                    | (unsteady) 1.67-1.70 | 2:14-2:16            |
|                                                                                    | 212   |       |                    | 1.694                | 1:58 ✓               |
|                                                                                    | 228   |       |                    | 1.695                | 1:56                 |
|                                                                                    | 210   |       |                    | 1.775 V              | 1:54                 |
|                                                                                    | 202   |       |                    | 1.76 V               | 1:51                 |
|                                                                                    |       |       |                    | <del>1.77</del>      |                      |

(\*) Saved in 2 files - 022223.txt  
021223b.txt ⇒ can# 204 only

1/9/03

WIND Logger

Time = 8/9/05 9:59:29

Real time 1/9/03 15:49:26

④ Bill tried downloading at ~ 2:00 ⇒ got Telecommunications Failed (Repeatedly)

⇒ Probably a timing error - logger is trying to send out data AT 10 Hz - then gets interrupted.

About 30 min later - I tried again - this time it took awhile but connected - however clock was way off, looking at downloaded data - clock screwed up on last 1/2-hour sample ⇒ when Bill (or I?) tried connecting. Somehow trying to connect was screwing up logger clock.

⇒ ~11:00 TECO  $O_3$  dt

~ 3:30 - New  $CO_2$  calibration standard (X) DID we leave it open?  
I THINK SO!

11:45 - 3:00 ⇒ found breaks in Heat Flux plates &  
repaired - All seemed to be working

⇒ Note on JAN 7TH - Bill downloaded loggers

Hooked up K<sub>r</sub> hygrometer - signal was too high  
& was reading off scale for a day or 2

⇒ CHECK MRS TEMP logger - was running perfectly (as well as  
before) ⇒ so downloaded.



1/10/03

Control EG

FID  $\Rightarrow$  MENU BAR

Eol. 7 Setup -

Analog IN - Tc

A13

Page 2  $\Rightarrow$  MFCsAnalog Out  $\Rightarrow$  control flow controllers A0#  
except carrier gasDig. Out  $\Rightarrow$  Runs relays

DO#

Force  $\Rightarrow$  program controls

H = OFF L = ON

GC START  $\Rightarrow$  sends signal to GC program

Calculation -

Display <sup>THO</sup> set pointsPID  $\Rightarrow$ sets the set points

Sequences -

main program

seq 0  $\Rightarrow$  default  $\Rightarrow$  sitting idleseq. 5  $\Rightarrow$  security sequenceTHINGS get too hot  $\Rightarrow$  turns off  
(or cold)seq. 4  $\Rightarrow$  push button to start (on rack)

sets it up - turns on seq. 3

Adds up volume

Step 17  $\Rightarrow$  where you change sample volume !! $\hookrightarrow$  once you get to set volume  
 $\hookrightarrow$  turn on seq. 6.Seq. 6  $\Rightarrow$  Dry purge(backflush)  $\Rightarrow$  Flows He thru trap to vacuumTo dry ~~the~~ sample (in cartridge) $\Rightarrow$  sets to 40°C

RAMPs

Flashes for 10 min

THEN seq. 7

Add internal stds

for checking MS response!

NOT for determining if sample is good

DO22  $\Rightarrow$  H  $\Rightarrow$  puts into lineL  $\Rightarrow$  TAKES out of line

THEN

to seq. 1  $\Rightarrow$  Descriptionmove E1  $\rightarrow$  E2DO13  $\Rightarrow$  starts GCAdds 50cc  
very quickly!  
(source of  
error)

send signal to GC + waits 10 min  
 This same time - GC is cooling from  $150^{\circ} \rightarrow -50^{\circ}C$

After 10 min - inject // Enable heat  
 Heat up to  $150^{\circ}$  turn off cooling  
 wait up 5 min to inject

go back to beginning sequence

Seq. 2 - sets up delay for cal. overnight // (THIS IS CONFUSING part)

Under Displays menu

Sequence status - tells you where you are in sequence.

usually Barograph

ON HP

change method AT TOP level

SCAN METHOD

under sample name - change file name + info

HIT start RUN  
 THEN WAIT

RUN UNDER  
 "Instrument  
 Control"

Flow Controller Dilution

0-10 Scan - Display messed up  $\Rightarrow$  tenths place

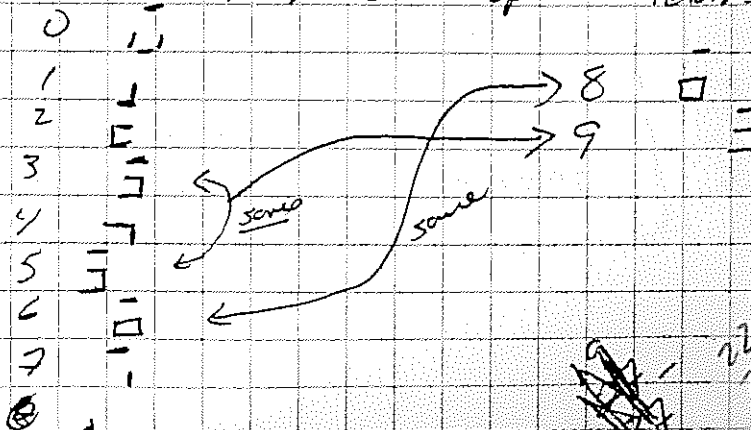

## DEA TESTS

Isoprene 1.7-2.4 ppm std.

 $F_{ISOP} = 5.06 \text{ sccm}$  $F_{AIR} = 3120 \text{ sccm}$ [Try to stop around  
1500 ml ( $\rightarrow$  2000 ml)]

| RUN | T <sub>START</sub> | T <sub>END</sub> | UP CAN            | DN CAN            | CAN<br>Exhaust                 |
|-----|--------------------|------------------|-------------------|-------------------|--------------------------------|
| 1   | 1:34<br>2:03       | 2:30             | 250<br>(V = 1894) | 220<br>(V = 1350) | 222 start<br>201 off at 2:25   |
| ④ 2 | 2:34<br>3:01       |                  | 252               | 224               | 214 (at start)<br>203 (3-3:27) |

④ CHANGED  $F_{STD} = 7.04 \text{ sccm}$ 

1/13/02

New Cartridges

Ours to Empty  
~~Empty~~

Empty

✓ J99200 (6)

✓ J99226

✓ J99209

led backwards J99232

[J99222]

Refilled:

0.2095 g C-trap

99.7 mg C-sieve

0.2029 g C-trap

0.1065 g C-sieve

0.1038 g C-sieve

0.5349 - 0.3295 Tenax

0.3563 - 0.0836 Tenax

0.2494 - 0.0149 Tenax

0.5461 g - 0.2345 Tenax

0.3295 - 0.0475 Tenax

0.5603  
- 0.3255  
0.2345

J99200

209.5 mg C-trap

205.4 mg Tenax

J99209

202.9 mg C-trap

234.5 mg Tenax

J99226

99.7 mg C-sieve

272.7 mg Tenax

J99222

103.8 mg C-sieve

280.0 mg Tenax

Russ' Isoprene std. at NCAR

Dot- 3AL2216 5527033 LUXFER 01A91

- ① Load 6L sample
- ② Load at 35°C (dry)
- ③ Load humidified → figure this out

### Loading cartridges

Seq. 2

CLOSE DATA BASE

Go to

File Load - precl file

Quantitate → update data base

Load next file - update

HPCHSM/custm report/biosim7.crd

Sequence - Load

Give unique names to files -

Sequence Run - THEN wait

Change Seq 14 - line 17

Under

I/O (on Control EG)

Seq

Seq. Reset (Seq. 2)

THEN

Seq ON (Seq 2)



1/20/03

To Do

At Site

- (1) More  $N_2$  (contact Duane)
- (2) ~~Get PC card - Amy DREITZ (JAN. 22)~~
- (3) Calibrate new standard (not critical)
- (4) ~~Replace or fix EC pump & CHECK WHY IT'S NOT RUNNING?~~
- (5) Loopback tests on Duck
- (6) Download MRStep; NPARIC (maybe soil23x)
- (7) ~~Put up IR-Therm. sensor~~
- (8) ~~Bring down data on zip drive~~

Check dissection

To Take

- 1 (A) Zip drive & disk
- 1 (B) NPAR tester
- (C) Extra pump

(D) List of stuff to do at Tower

XU-Lab

- (1) ~~New Deck targets~~ NO - we have
- (2) ~~Check Amy's Dissection~~ Amy plenty.
- (3) Order new HMP45D
- (4) Get ATI fixed

Disjunct Sampler

- (1) Run isoprene cans - bring other pump up  
THEN pump decision
- (2) Talk to Eiko - w/c term  
Relock at simulations
- (3) Isoprene in the field

Data Management

- (1) Calculate DAILY sums for 2002

Balloon

- (1) Read Iodine stuff
- (2) THINK ABOUT how to  
calibrate
- (3) Talk to Ned??

Data - Miscellaneous

- (1) Re-write prof. Ter code

Fast 03

- (1) Figure out if AUG. 870-LS does anything
- (2) Spectral Corrections
- (3) More about  $H_2O$  interference

Ney

- (1) Get Ted's instrument - start from there

Papers

- (I). ① Perleak references, etc.  
 ② Gilko's stationarity comment  
 ③ Prod Dean, Peter & Russ for comments
- (II) ① Combine Peter & Dean's comments  
 (where's Dean's electronic version?)  
 ② Look for nighttime waves,  
 - ① Richardsons #  
 ② Spectra (w/ freq.)  
 ③ Vector plot + Peter's pressure map for 1 figure  
 ④ Look at Finnigan et al. corrections - USE ALL DATA  
 (day + night obs)

IR-T

5 H - BLUE > IR-T  
 L - WHITE  
 +5V - RED  
 G - BLACK

~~To get 23k = 260s~~

| AT | 300 secm i | 1 L = | TIME             |     |
|----|------------|-------|------------------|-----|
|    |            |       | min              | sec |
|    |            | 2 L = | 6.66             | 40" |
|    |            | 3 L = | 10               | min |
|    |            | 4 L = | 13 $\frac{1}{3}$ | min |
|    |            | 5 L = | 16 $\frac{2}{3}$ | min |
|    |            | 6 L = | 20               | min |

DATE = 10.08.03

1/22/03 Filling Cartridges on ~~Auto Sampler~~ Auto Sampler(I) Dry - ~~Auto~~We want 6L on each  
At 300 sccm - 20 minutes

| <u>Position</u> | <u>Cartridge #</u> | <u>Flow Rate</u> | <u>Time</u> | <u>Volume</u> |
|-----------------|--------------------|------------------|-------------|---------------|
| 1               | J99209             | 300              | 20:00       | 6L            |
| 2               | J99200             | "                | 20:00       | 6L            |
| 3               | J99222             | "                |             |               |
| 4               |                    |                  |             |               |

$$\text{Std. Flow} = 0.94(-0.18) V = 0.76 V \Rightarrow 1.52 \text{ sccm}$$

$$1^{\text{st}} \text{ Stage} = 100 \text{ sccm}$$

$$2^{\text{nd}} \text{ Stage} = 1000 \text{ sccm}$$

~~Isoprene~~

$$\text{Dilution Factor} = 0.00137$$

$$\text{For isoprene} = 10 \text{ ppm} \Rightarrow 13.7 \text{ ppb}$$

$$\alpha\text{-pinene} = 5 \text{ ppm}$$

$$n\text{-heptane} = 10 \text{ ppm}$$

$P_f = 53.6$

$\sim 4$  cc/ digit

100 Torr  $\sim \frac{1}{2}$  L

SRI-310 GC

How to use

IN STANDBY: 6-way  
Valves: L AND B  
(Vac) (Backflush)

on box: vac.  $\Rightarrow$  open

sample  $\Rightarrow$  closed

Heat off (switch on right)

To load - close vac.  $\Rightarrow$  Read initial pressure

Pick up can to inlet line

TURN - BACKFLUSH  $\rightarrow$  Sample (6-way)

open Sample (on/off)

open can & fill (watch pressure)  
( $\sim 50$  Torr works  $\sim 250$  cc)

When full - shut off can

To inject - 6-way L  $\rightarrow$  I (load to inject)

HIT SPACE BAR in "Peak sample"

& TURN ON heat (quickly as possible)

somewhere down line - open vacuum (close sample)

To pump out

move I  $\rightarrow$  L

S  $\rightarrow$  B

~~Turn~~ Turn off heat

Disconnect can



OTE- CAN #214  
was messed up  
- Nothing in it. 171

⊗ Isoprene Peak at 3.26 min

DRIFTING  
Baseline

|             | CAN # | OP        | AREA 1  | File | AREA 2               |
|-------------|-------|-----------|---------|------|----------------------|
|             | 222   | 50 TORR   | 51.9030 | A80  | 55.9005              |
|             | 222   | 44 TORR   | 41.7780 | A81  | 44.3430              |
| - Temp ⊗    | 250   | 50 TORR   | 32.3100 | A82  | —                    |
| sp may      | 250   | 50.0 TORR | 32.832  | A83  | —                    |
| been too    | 201   | 50.0      | 39.629  | A84  | 43.8610              |
| during      | 201   | 31.7 TORR | 25.604  | A85  | 27.881               |
| ling - will | 224   | 50.6 TORR | 53.323  | A87  | 61.165               |
| e sample!!  | 224   | 47.0      | 45.1825 | A88  | 45.3718              |
|             | 220   | 61.5 TORR | 55.193  | A89  | 72.8165              |
| DIRTY       | 220   | 38.6 TORR | 32.385  | A92  | 34.931               |
| CANS.       | 203   | 47.3 TORR | 53.494  | A96  | 55.756               |
| ??          | 203   | 30.8 TORR | 18.6035 | A101 | ⊗ Sensitivity change |
| 250 + 214   | 252   | 47.9      | 74.970  | A102 |                      |
|             | 252   | 47.4      | 74.225  | A103 |                      |

LONG RETENTION TIME - acetone - not isoprene

1124 Refilling cartridges - using Russ isoprene standard

| Position | Cartridge | Flow Rate      | Time  | Volume | Can # |
|----------|-----------|----------------|-------|--------|-------|
| 1        | J99 200   | 60% → 300 sccm | 20.00 | 6L     | 225   |
| 2        | L 209     | " "            | " "   | " "    | 205   |

⇒ Last fill didn't work ⇒ Nothing loaded on cartridge  
CHECKED: ① sampler - seemed like flows were OK  
(sampling proper cartridges)

Only thought ⇒ using low flow on DILUTION system may not  
standard

have actually gotten standard in (using lowest flow  
I could measure)

THIS TIME ⇒ USING Manson standard (~2ppm)

- cranked regulator pressure to ~50psi
- using low concentration - bigger flow

$$\begin{aligned}
 F_{STD} &= 8.05 \text{ V} = 8.1 \text{ sccm} \quad \text{Assuming 2ppm} \\
 F_{1ST \text{ stage}} &= 5.00 = 100 \text{ sccm} \\
 F_{2ND \text{ stage}} &= 4.98 = 996 \text{ sccm} \\
 &\quad \left( 2 \text{ ppm} \times \frac{8.1}{108.1} \right) \times \frac{996}{108.1} = 0.075 \text{ ppm}
 \end{aligned}$$

54212

sigma ALDRICH

username:

password:

ATurnipseed  
ATurnipseed

0.150

~~2.075~~ ppm

$$\left( \frac{108.1}{1104} \right) = 0.0147$$

0.0147

~~0.66734~~

$$= \frac{17.7 \text{ ppb}}{1000}$$

Also - placed a CAN on the exhaust to see if isoprene in the flow (tell us if problem is dilution system or cartridge sampler) -

1/27/03

Another try at filling cartridge  
Still gave blank(?)

⇒ use my dilution system / Isoprene std.

| Cartridge                           | F(isop) | F(air)      | F(sample)                  | Time    | Volume                 | CAN #       |
|-------------------------------------|---------|-------------|----------------------------|---------|------------------------|-------------|
| BLANK                               | 0       | 1.36 (slpn) | —                          | —       | —                      | 205         |
| J 99 209                            | 7.09    | 1.03        | 4.38 V(114.4 sec)          | 52' 11" | 5953 cm <sup>3</sup>   | 225         |
| 200                                 | 7.09    | 1.03        | 4.34 (118.8 sec)           | 51' 58" | 6173.6 cm <sup>3</sup> | 205 (again) |
| Humid sample (97% humidity)         |         |             |                            |         |                        |             |
| 209                                 | 7.09    | 1.03        | 4.50 V                     | 52' 03" | —                      | 225         |
| Humid - BAI standard (77% humidity) |         |             |                            |         |                        |             |
| 200                                 | 3.03    | 3.01        | 4.54 V / 4.44 V            | 52' 10" | —                      | 205         |
| 209                                 | "       | "           | 4.41 - 4.59 (after 36 min) | 52' 51" | —                      | —           |
| 200 (dry)                           |         |             |                            |         |                        |             |
| 200 (dry)                           | 3.03    | 3.01        | 4.52                       | 52' 02" | —                      | —           |

un. rps help  
x 26096

$$\begin{array}{r} 101.0 \\ 53.1 \\ \hline 47.9 \end{array} \quad \begin{array}{r} 100.6 \\ 53.2 \\ \hline 47.4 \end{array}$$

## Summary of DEA TEST - Pg 132

| CAN   | Description           | Area/P (from GC)              | Notes                                         |
|-------|-----------------------|-------------------------------|-----------------------------------------------|
| ✓ 250 | UP                    | <del>1.646</del> 3.646, 0.657 |                                               |
| ✓ 220 | DOWN                  | 1.184, 0.905                  | DIRECT CAN                                    |
| ✓ 222 | 1 <sup>st</sup> Flush | 1.118, 1.006                  | IS <del>NOT</del> CAN RUN                     |
| ✓ 201 | 2 <sup>nd</sup> Flush | 0.877, 0.899                  |                                               |
| ✓ 252 | UP                    | 1.565, 1.566                  | ⇒ AFTER CHANGE - peaks are                    |
| ✓ 204 | DN                    | 1.801, 0.965                  | - DIRECT CAN                                  |
| 214   | 1 <sup>st</sup> Flush | NA                            | Nothing there??                               |
| ✓ 203 | 2 <sup>nd</sup> Flush | 1.179, 0.604                  | change of H <sub>2</sub> flow<br>Between runs |

Overall note - with exception of CANS 252 + 203 - ALL suffer from leak in GC inlet system - Is usually worse on 2<sup>nd</sup> run since SP is less - thus loading injection loop is slower,

Mostly - a big failure - leak in inlet system + dirty cans really screwed things up.

Ng Master Blaster

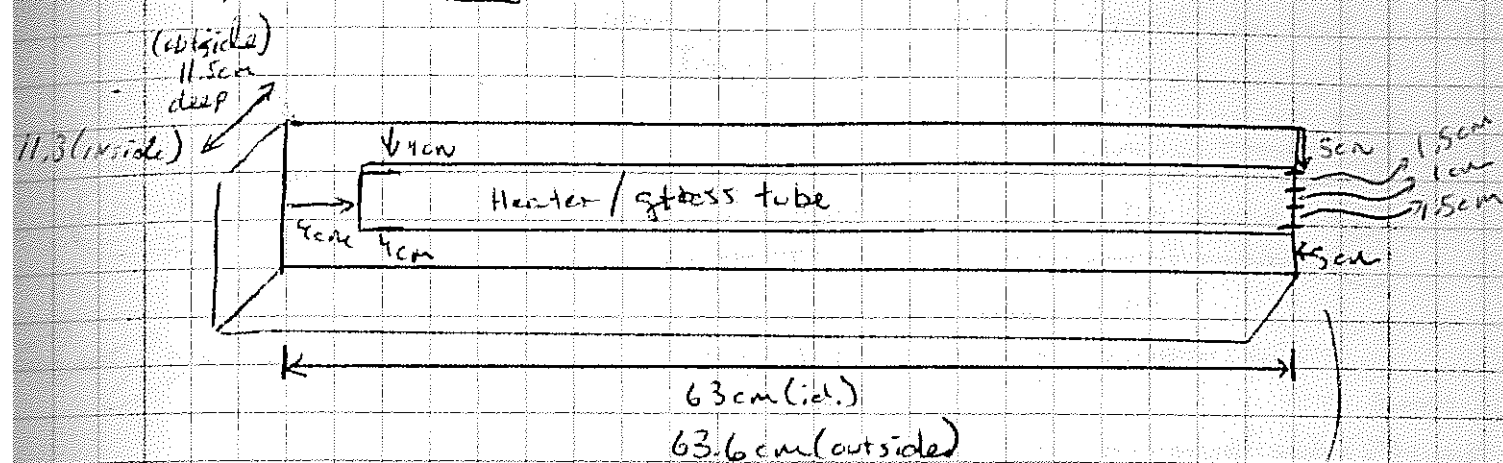

## Punching

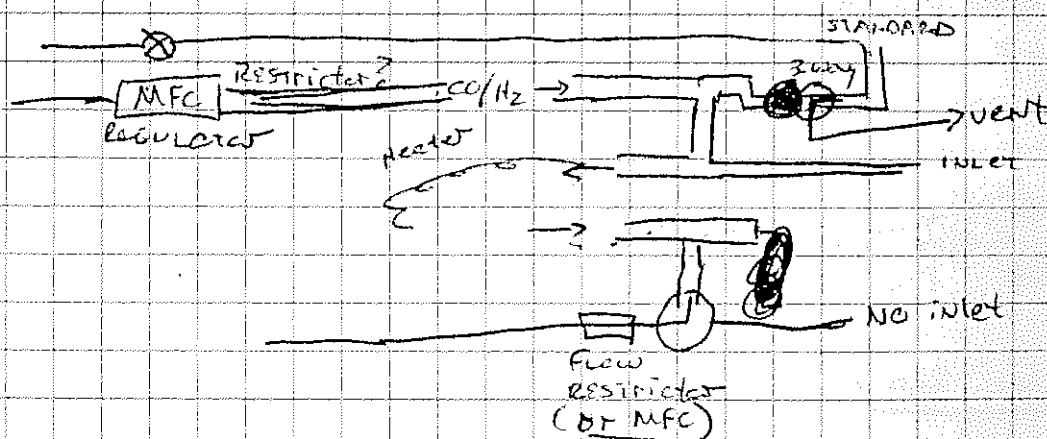



2/17/03 List of things to do.

### At Tower

- (1) ~~check for  $H_2$  leak~~
- (2) check out kr hygrometer hook-up  $\Rightarrow$  Now look at data
- (3) ~~Add  $H_2$  data to  $CO_2 + H_2O$  from Li7500~~  
 $\hookrightarrow$  w/ Sam go thru whole process
- (4) ~~Grounding questions & laptop tests~~  
 $\hookrightarrow$  w/ Gordon (Wed or Thurs)
- (5) ~~Get data that Bill downloaded  $\Rightarrow$  get laptop~~

### Stuff to order or repair

- (1) Swagelok fitting for profiler
- (2) All repaired
- (3) RMY valve repaired

### Fast 03

- (1) look at spectral connections!!
- (2) Make an  $H_2O$  interference

### Data Processing

- (1) Daily Sums  $\Rightarrow$  need met sums
- (2) Rewrite Profiler code

### Misc

- (1) Send disjunct sampler to Brian Lamb (Tuesday)

### Duke Exp

Organization: (1) Talk to Gabby about services

(2) Get together w/ Eiko/Thomas about Fast data

- (A) Ncy - (1) make drawing of Master Blaster (Eric on Wed started)
- (2) Get Labview driver to IBM (talk to Eiko)

- (B) PAN (1) Call Jim Roberts - what  $V_d$  would you expect?
- (2) Make up graph for Greg - try to figure out what we might see!

### (C) Disjunct Sampler

$\hookrightarrow$  Need laptop from Eiko

Think about situation when J.N gets back

- (1) Repeat can experiment w/ Isoprene/can plume standard
- (2) Move towards doing some field DEC measurements
- (3) Get back to simulations

Iodine/Balloon stuff

- ① Read papers  
② Postpone til Jim gets back

Turbulence PapersPART I  $\Rightarrow$  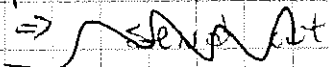

- PART II  $\Rightarrow$  (1) PLOT IN Peter + Deans comments —  
 (2) Vector plot for Figure — Almost there  
 (3) check out Spectral screening of nighttime waves.  
 (4) Re-check Finnigan et al. corrections!

2/26/03

To RUN DESA right now—

- (1) RUN DESA-Analogues/20Y  
 (2) RUN ~~SENSE~~ SENSE File. 11h  $\Rightarrow$  Eddy Correlation  
 under finalization

1/28/03 Re-doing DES TEST — using KNF pump (after trying to clean  
 (could be MeOH present) Sample flows 250 sccm  
 Flows = 5.03 (STD) sccm ~ 10 ppb concentration  
 5.01 (AID) SLPM of isoprene

UP  
 = Flush/EC  
 DN

| RUN | START TIME | FLUSH CAL      | UP CAL | BE SWITCHED                   |
|-----|------------|----------------|--------|-------------------------------|
| 1   | 10:30      | 250 (at 11:50) | 252    | 201 * pressure above ambient! |
|     |            | ✓ 226          |        |                               |
| 2   | 11:37      | 100            | 222    | 203 → pressures look good     |
|     |            | 205 (AT 12:17) |        |                               |

201 ✓  
 203 ✓  
 252 ✓  
 250 ✓  
 226 ✓  
 100 ✓  
 205 ✓  
 222 ✓

3/3/03 More stuff to do

### Tower

- ① ~~Hook up 2m Visc. to RH/T~~
- ② ~~Download loggers (end of month)~~
- ③ ~~See Gert w/ MRS + download card - THEN switch card.~~
- ④ ~~Fix TC's~~
- ⑤ Look again at kr data (after flux calculations)

### OTHER

- ① ~~Fittings for profiler~~
- ② ~~RH valve~~
- ③ check on ~~AX~~, ~~Li7500~~

### O3

- ① Water Corrections
- ② Look at 1 sec. data
- ③ Spectral Corrections
- ④ Detlev's data

### DATA Processing

- ① ~~Data sums (not only)~~
- ② Get up Dean on Trut comparisons
- ③ Rewrite profiler code

### NCAR

#### Disjunct Sampler

- ① Simulations - get back to
- ② Run cans on GC/MS (if its running)  
↳ Fill a few more cans
- ③ Buy a new pump etc
- ④ Move towards making some measurements in field.
- ⑤ Automation - when Jim gets back

#### Miscellaneous

- ① Make up some cartridges



- Wdy
- ① ~~Tell to Sam - Mon - March 10~~
  - ② Order Master-Blaster box
  - ③ Take apart PMT housing - look for preamp board
  - ④ Think about Labview program w/ Eiko

FRAN ① Send Darlene/Greg something on what precision you need for a given  $V_0$

Overall

- ① Email FRAM (Questions & what we're doing)
- ② Continue w/ how to set up
- ③ How to sync up data for everyone.

✓ Also - Turb. Paper II

3/28/07 - Quick test w/ DES &  
With big pump on + running - what is pressure drop in cell?

RT 1 m inlet line - 3 m DES  $\rightarrow$  Pump line (all  $\frac{1}{2}$ " Teflon)

$$\Rightarrow \Delta P = 80 - 70 \approx 10 \text{ kPa}$$

w/ inlet disconnected:  $P = 72 - 73 \text{ kPa}$

Residence Time = 500 cc

$$\text{For } \tau = 0.1 \text{ sec} \rightarrow$$

$$1 \text{ sec} \rightarrow$$

$$5000 \text{ cm}^3 \cdot \text{s}^{-1} (5 \text{ L} \cdot \text{s}^{-1}) \Rightarrow 300 \text{ Lpm}$$

$$30 \text{ Lpm}$$

|     | $\tau$  |
|-----|---------|
| 10  | 3 sec   |
| 30  | 1 sec   |
| 50  | 0.6 sec |
| 75  | 0.4 sec |
| 100 | 0.3 sec |



4/2/03- Hooked up SR1310 GC AGAIN  
New set of cans

500 cc ~ 35 P-units

700 cc ~ 50 P-units

1 P-unit ~ 14 cm<sup>3</sup>

T<sub>trap</sub> = -22°C

| CAN # | Description | File              | P <sub>1</sub> | P <sub>2</sub> | ΔP   | T <sub>trap</sub> |
|-------|-------------|-------------------|----------------|----------------|------|-------------------|
| 202   | Standard    | A271. CHL/BROMOAN | 107.3          | 154.8          | 47.5 | -22°C             |
|       |             | A272              | 107.2          | 158.8          | 51.6 | -7°C →            |
| 224   | Standard    | A273              | 106.7          | 182.5          | 75.8 |                   |
|       |             | A274              | 106.6          | 158.4          | 51.8 | -19°C             |
| 202   | Standard    | A275              | 106.5          | 160.0          | 53.5 | "                 |
|       |             | A276              | 106.2          | 144.4          | 38.2 | "                 |
| 224   | Standard    | A277              | 106.2          | 164.3          | 58.1 | "                 |
|       |             | A278              | 106.3          | 147.5          | 41.2 | -16°C             |
| 226   | FUSU/DEA    | A279              | 106.1          | 147.6          | 41.5 | "                 |
|       |             | A280              | 106.2          | 136.6          | 30.4 | "                 |

Ⓢ Note - Filled cans 202 + 224  
with standard

F<sub>520</sub> = 5.04 sec/cm

F<sub>100</sub> = 5010 sec/cm

Isoprene RT ~ 3.0 min

Heptane RT ~ 5.8 min

α-pinene RT ~ 11.95

| CAN | File | A(Iso)  | A/ΔP (Isoprene) | A(W <sub>p</sub> ) | A/ΔP (heptane) |
|-----|------|---------|-----------------|--------------------|----------------|
| 202 | A271 | 3.1346  | 0.06599         | 48.284             | 1.0165         |
|     | A272 | 5.9844  | 0.1160          | 49.2218            | 0.9539         |
|     | A273 | 8.4836  | 0.1119          | 93342              | 0.1231         |
|     | A274 | 7.3706  | 0.11423         | 8.7732             | 0.1694         |
|     | A275 | 51.2484 | 0.9579          | 79.225             | 1.4808         |
|     | A276 | 37.5921 | 0.9811          | 59.2622            | 1.5514         |
|     | A277 | 47.7070 | 0.8211          | 62.837             | 1.083          |
|     | A278 | 39.6114 | 0.9614          | 49.1186            | 1.1922         |
|     | A279 | 5.5045  | 0.1326          | 53.264             | 1.2835         |
|     | A280 | 4.3371  | 0.1427          | 41.2568            | 1.357          |

Dipty

1.101

New batch of cartridges

| <u>Cartridge #</u> | <u>mg Carbotrap</u>    | <u>mg Tenax</u> |
|--------------------|------------------------|-----------------|
| 0J99 221           | <del>195.6</del> 217.3 | 205.4           |
| 0 232              | <del>204.7</del> 196.6 | 213.0           |
| 0 223              | <del>207.7</del> 207.7 | 207.9           |
| 0 203              | <del>207.7</del> 209.7 | 208.0           |
| 0 227              | <del>205.4</del> 206.2 | 202.7           |
| 0 202              | <del>205.6</del> 205.4 | 208.3           |
| 0 230              | <del>207.7</del> 208.6 | 211.4           |
| 0 224              | 204.7                  | 211.7           |
| 0 228              | 202.7                  | 209.3           |

|     |       |
|-----|-------|
| 239 | 206.1 |
| 217 | 204.3 |
| 231 | 211.3 |
| 229 | 209.5 |
| 219 | 205.5 |
| 238 | 207.6 |
| 236 | 200.0 |
| 210 | 206.1 |
| 207 | 209.1 |
| 234 | 204.7 |
| 214 | 206.4 |

A/SP (w pin)A/SP (w pin)

|         |          |
|---------|----------|
| 20.2831 | [ 0.3791 |
| 15.0376 | [ 0.3937 |
| 39.995  | [ 0.6884 |
| 30.5327 | [ 0.7411 |

$R_t(\text{isop.}) = 29.3.0 \text{ min}$   
 $R_t(\text{Hep.}) = 5.8 \text{ min}$   
 $\Delta P = 11.95$

4/4/03    more GC runs

| CAN #                               | Descrip   | File | P <sub>1</sub> | P <sub>2</sub>                                   | $\Delta P$ | A (isop.)                            | A/ $\Delta P$            |
|-------------------------------------|-----------|------|----------------|--------------------------------------------------|------------|--------------------------------------|--------------------------|
| 100                                 | DEA/FLUSH | A284 | 105.8          | <del>106.1</del> 154.5                           | 48.7       | <del>255.7</del> <del>14.28</del> 78 | <del>0.4977</del> 0.5252 |
| 100                                 | "         | A285 | 106.0          | 170.7                                            | 34.7       | 17.246                               | 0.4971                   |
| 222                                 | DEA/up    | A286 | 105.8          | 152.2                                            | 46.4       | <del>116.4</del> <del>10.14</del> 2  | <del>2.242</del> 2.396   |
| (+) 222                             | "         | A287 | 105.9          | 171.7                                            | 33.8       | <del>81.8</del> <del>12.37</del> 4   | <del>2.230</del> 2.399   |
| → MAY have filled w/ He same (oops) |           |      |                |                                                  |            |                                      |                          |
| 205                                 | DEA/FLUSH | A288 | 106.0          | <del>155.6</del> 155.6                           | 49.6       | -                                    | - No isoprene            |
| 203                                 | DEA/DN.   | A289 | 106.0          | 177.4                                            | 38.3       | 16.364                               | 1.2105                   |
| 203                                 | DEA/DN.   | A290 | 106.0          | 136.6                                            | 30.6       | 37.70                                | 1.232                    |
| 252                                 | DEA/up    | A291 | 106.1          | 143.6                                            | 37.5       | -                                    | - No isoprene -          |
| 250                                 | DEA/FLUSH | A292 | 106.0          | 143.6                                            | 37.6       | -                                    | - No isoprene -          |
| 201                                 | DEA/DN    | A293 | 106.1          | *<br>→ screwed up - don't know volume - but this |            |                                      |                          |

MORE DEA TESTS - using humidified air

$F_{STR} = 5. \text{ sec/cm}$     5 sec flush  
 $F_p = 5000 \text{ sec/cm}$     20 sec Transp  
 $F_{sample} = 250 \text{ sec/cm}$

| RUN | T Start | T END | FLUSH CAN                   | up can          | DN CAN              |
|-----|---------|-------|-----------------------------|-----------------|---------------------|
| 1   | 11:00   | 11:00 | ✓ 202<br>✓ 224 (11:27)      | ✓ 225           | ✓ 208               |
| 2   | 1:00    | 2:00  | ✓ 204<br>✓ 214 (1:27)       | ✓ 212<br>DIRECT | ✓ 200               |
| 3   | 2:05    | 3:03  | ✓ 222<br>[ 210 ] (2:29) (?) | 220 ✓<br>DIRECT | ✓ [ 210 ]<br>DIRECT |

4/7/03 GC runs of humidified samples (TAKEN at 4/4/03)

Retention Times (min)  
 Isoprene ~ 2.9-3  
 heptane - 5.7-5.8  
 $\alpha$ -pin - 11.95  
 11.43

| Can#  | File | Description        | P <sub>i</sub> | P <sub>e</sub> | $\Delta P$ | A (Isop.)                     | A (Rep.)                      |
|-------|------|--------------------|----------------|----------------|------------|-------------------------------|-------------------------------|
| 202   | A294 | DGA/FLUSH          | 107.4          | 142.1          | 34.7       | 43.9253                       | 67.1205                       |
| "     | A295 | "                  | 107.8          | 140.6          | 32.8       | 40.8218                       | 63.0810                       |
| 225   | A296 | up can             | 107.3          | 142.2          | 34.9       | 36.8670                       | 58.0064                       |
| "     | A297 | <del>FLUSH</del> " | 107.3          | 139.3          | 32.0       | 34.9358                       | 51.6703                       |
| - 224 | A298 | flush can          | 107.2          | 142.6          | 35.4       | 60.2832                       | <del>10.243</del> 216.319     |
| 206   | A299 | down can           | 107.03         | 140.2          | 32.9       | 39.6066                       | 45.6546                       |
| "     | A300 | "                  | 107.43         | 135.6          | 28.3       | 46.5204                       | 38.252                        |
| 200   | A301 | down can           | 107.5          | 142.8          | 35.3       | 53.0720                       | 51.935                        |
| - 204 | A302 | flush              | 107.3          | 140.5          | 33.3       | <del>50.1400</del><br>41.5112 | <del>50.1400</del><br>63.7208 |
| - 204 | A303 | FLUSH              | 107.0          | 136.4          | 29.4       | 39.2822                       | 57.1190                       |
| 200   | A304 | DN CAN             | 107.0          | 134.6          | 27.6       | 49.6407                       | 43.8626                       |
| 212   | A305 | UP CAN             | 106.9          | 143.6          | 36.7       | 53.9372                       | 70.0060                       |
| "     | A306 | "                  | 106.9          | 134.0          | 27.1       | 43.7792                       | 51.1582                       |
| 210   | A307 | DN CAN             | 107.0          | 140.9          | 33.9       | 70.6136                       | 49.0682                       |
| 201   | A308 | FLUSH              | 107.8          | 138.9          | 30.7       | 52.0238                       | 21.1272                       |
| 220   | A309 | up can             | 106.7          | 150.6          | 44.1       | 58.4796                       | 78.0268                       |
| 222   | A310 | FLUSH              | 106.7          | 149.0          | 42.3       | 64.1902                       | 89.910                        |
| 214   | A311 | FLUSH              | 106.7          | 143.4          | 36.7       | 44.2254                       | 72.7496                       |

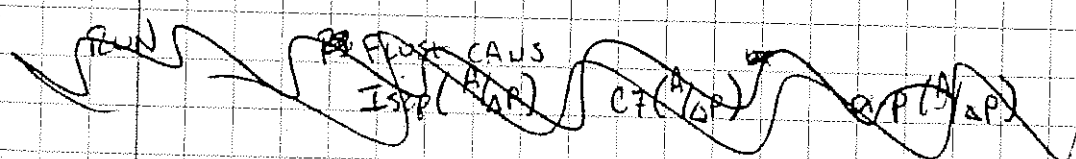

4/11 Isolated purp/MFC from disp. samples

⇒ Filled cans just by pushing -

| Time on | can# | Time off | FLUSH CAN |
|---------|------|----------|-----------|
| 11:28   | 252  | 12:01    | -         |
| 12:05   | 203  | 12:35    | 205       |
| 12:39   | 214  | 1:40     | 222       |
| 1:48    | 220  | 2:45     | 201       |



Further DIA TEST - could we get contamination from 3-way valve  
 Just upstream of pump  $\Rightarrow$  Put Hydrocarbon trap on that line  
 SHOULD get rid of "junk"  $\Rightarrow$  still see "loss" (dilution)

| Time start | trend | FLUSH CAN | up can | DN CAN |
|------------|-------|-----------|--------|--------|
| 3:37       |       | 210       | 203    | 205    |

\*Note - Port way thru - more volume in the "up" can - but pressure is higher in the "down" can. Suggests a leak in down line!

Will try to pump out some cans & then run in DE can mode (just watch the leak rate -)

Fitting to Down P-sensor was loose

For Monday - Recheck all fittings

- THEN - Hook up evacuated cans to up/down - run in D3. Eddy can mode & watch pressure increase

- THEN TRY RUNNING some cans in mid-afternoon w/ HC Trap

4/14 - Leak checking back end (cans  $\rightarrow$  up/down selection valves)

| Time                   | P <sub>up</sub>     | P <sub>dn</sub>                                  | Condition      | P <sub>cell</sub> |
|------------------------|---------------------|--------------------------------------------------|----------------|-------------------|
| 1:09                   | 71.0                | 79.0                                             | Ambient        | 79.5              |
| 1:10 $\Rightarrow$ T=0 | 12.00               | 12.00                                            | - CANS OPEN -  |                   |
| 4:38                   | 12.00               | 15.88 $\Rightarrow$ FANT can & it goes up fast!! |                |                   |
| 6:02                   | 12.00               | 19.50 $\Rightarrow$ closed can                   |                |                   |
| 13:30                  | 12.00 $\Rightarrow$ | UP side looks fine! - close can                  |                |                   |
| 0                      |                     | 21.70                                            |                |                   |
| 1:30                   |                     | 27.00                                            |                |                   |
| 5:00                   | 16.30               | 28.729.00                                        |                |                   |
| 0                      |                     | 12.0                                             |                |                   |
| 6:00                   |                     | 12.0                                             | - looking OK - |                   |
| 10:30                  |                     | 12.0                                             |                |                   |
