# Supplementary material for: The Niwot Ridge Subalpine Forest US-NR1 AmeriFlux site – Part 1: Data acquisition and site record-keeping
Source: Copernicus journal article supplement (doi:10.5194/gi-5-451-2016), 2016-09-29
Supplement: Supplementary file 12 [file gi-5-451-2016-supplement.zip]

## **Niwot Ridge AmeriFlux ftp Site**

This and the accompanying documents will provide useful information concerning the content and format of the data files posted by the Niwot Ridge AmeriFlux site. Some documentation is provided in a short header at the top of each data file; however, a more thorough description of the data files (i.e., what sensors are used, corrections applied, description of the flags) are contained in these documents. The current documentation files are in pdf format (as is this document) and labelled as "Climate.pdf", "Fluxes.pdf", and "Sensors.pdf". Climate.pdf and Fluxes.pdf provide documentation on their corresponding data files; whereas Sensors.pdf gives an run-down of the sensors operating at the Niwot Ridge AmeriFlux site.

These data files are freely available to the public; however, we do ask that you abide by the "Fair Use Policy" listed below. This was originally developed by the Harvard Forest AmeriFlux site and was subsequently adopted by AmeriFlux as a whole.

---

### **FAIR USE**

**--Kindly inform the appropriate Principal Investigators of how you are using site data and of any publication plans. If the Principal Investigators feel that they should be acknowledged or offered participation as authors, they will let you know and we assume that an agreement on such matters will be reached prior to publishing and/or use of the data for publication. If your work directly competes with the Principal Investigator's analysis they may ask that they have the opportunity to submit a manuscript before you submit the one that uses their data. In addition, when publishing, please acknowledge the agency that supported the research.--**

---

These data files were last updated on :

|                      |                                                  |
|----------------------|--------------------------------------------------|
| <b>May 1, 2000</b>   | <b>Data from Nov. 1998 through Dec. 1999</b>     |
| <b>Jan. 16, 2001</b> | <b>Data from Jan. 2000 through Oct. 31, 2000</b> |
| <b>Jan. 14, 2002</b> | <b>Data from Nov. 2001 through Nov 30, 2001</b>  |
| <b>Jan. 3, 2003</b>  | <b>Data from Dec. 2001 through Oct. 31, 2002</b> |

We reserve the right to re-evaluate the data in the future as we may discover the need to apply new corrections or develop better methods of gap filling. Whenever data is updated or re-evaluated - it will be noted in this file.

The data files are organized into two types of monthly files listed under the directories of "Climate" and "Fluxes". Climate files include data such as meteorological (Air temperature, Relative Humidity, etc.) and radiation (PPFD, Net Radiation, etc.) measurements. Flux files include flux data such as CO<sub>2</sub>, sensible and latent heat, etc. Each climate and flux file has an accompany-

ing flag file which gives lists of flags which will be explained in the documentation files. These typically indicate whether data was available, questionable, or rejected for various reasons. They also indicate how substitute data was used or how gap filling was carried out. All files are space-delimited ASCII format and should be easily readable by most all spread-sheet applications. The time tag format is the same for all files. Data are reported as half-hour averages with the time tag signifying the beginning of the time period. For example a 9:00 time tag corresponds to the time period between 9:00 and 9:30. Time tags are all based on local time, either Mountain Standard Time or Mountain Daylight Time, depending upon the season.

If you have any questions or comments concerning our data or ftp site, please contact either :  
Andrew A. Turnipseed  
aturnip@colorado.edu

or

Russ Monson  
monsonr@colorado.edu
