# Supplementary material for: The Niwot Ridge Subalpine Forest US-NR1 AmeriFlux site – Part 1: Data acquisition and site record-keeping
Source: Copernicus journal article supplement (doi:10.5194/gi-5-451-2016), 2016-09-29
Supplement: Supplementary file 13 [file gi-5-451-2016-supplement.zip]

# LAB BOOK

50 SHEETS • 5 X 5 QUAD  
10 1/2" x 7 1/4" • 53-110

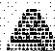

AMITY

Made in USA

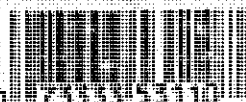

0 73333 53110 7

AMITY DESIGNER OFFICE PRODUCTS, SIMMONS, CA

# DATA LOGGER WIRING (AS OF 2/11/99)

PR23x ⇒ "FAST DATA"  
PROGRAM C7 H2FA.CSI

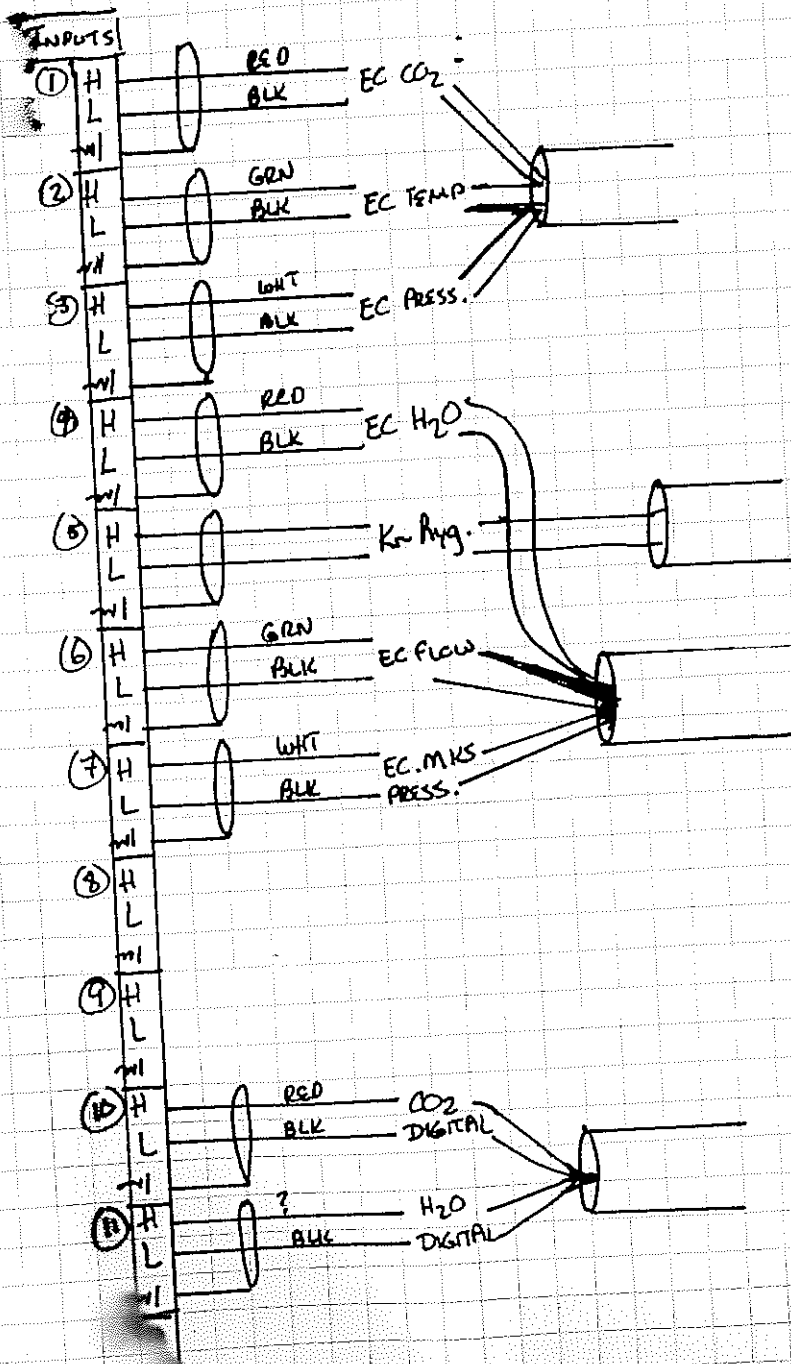

## CONTROL I/O

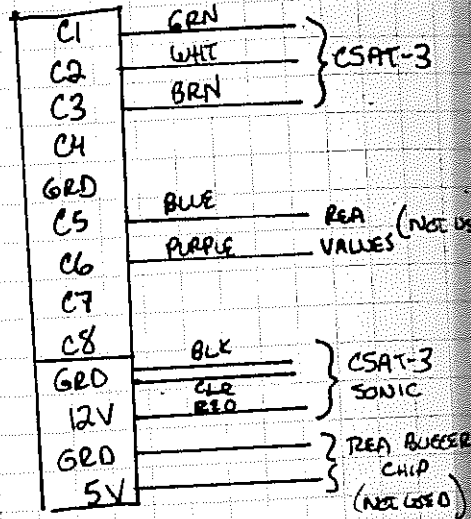

2. CR21L => "LIGHT"  
PROGRAM => LIGHT.CS

# INPUTS:

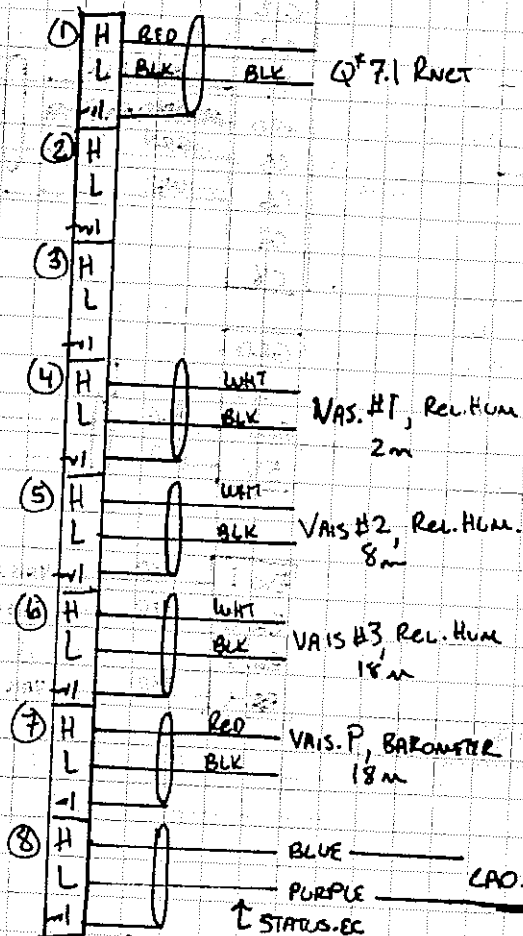

→ CORRECTION  
NO SHIELD !!

# CONTROL I/O

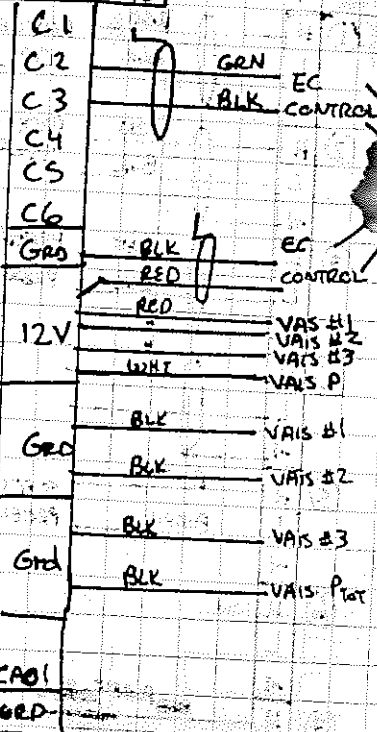

Ⓢ Eddy correlation CALIBRATION  
CONTROL IS FROM THIS  
DATA LOGGER.

23x "PROFILER"  
 PROGRAM: "PROF23x"

# INPUTS

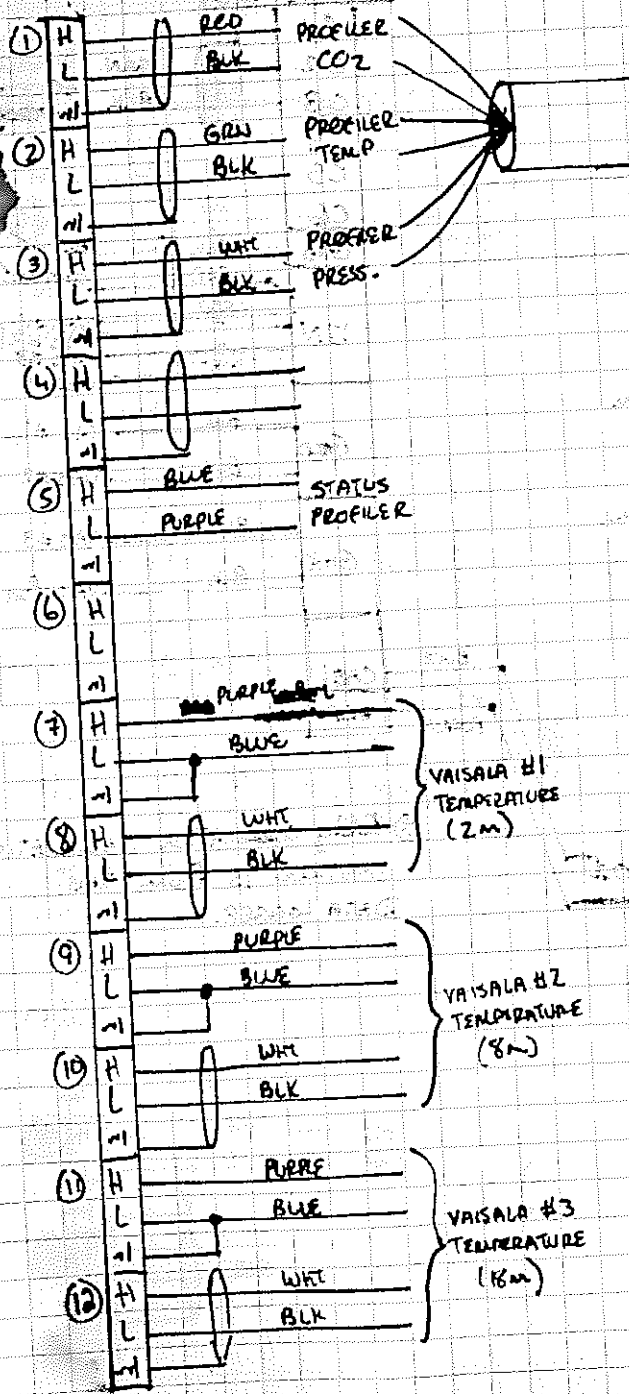

# CONTROL I/O

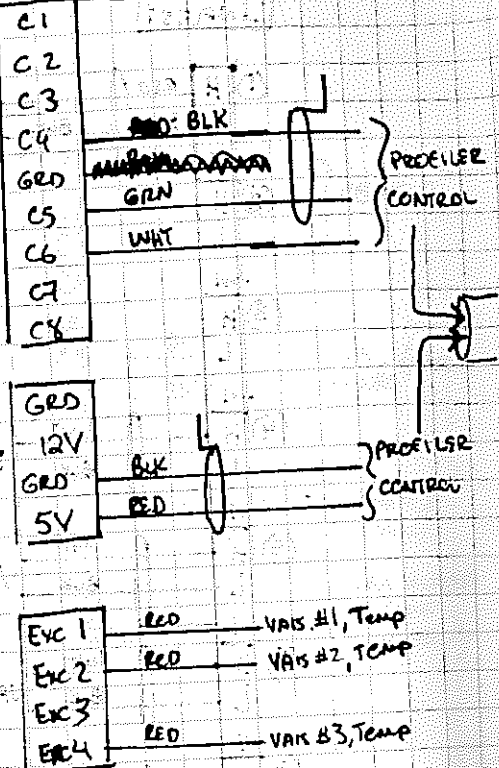



4. CR21x "SOIL-TOP"  
PROGRAM → SOIL-TOP.CSI

### INPUTS

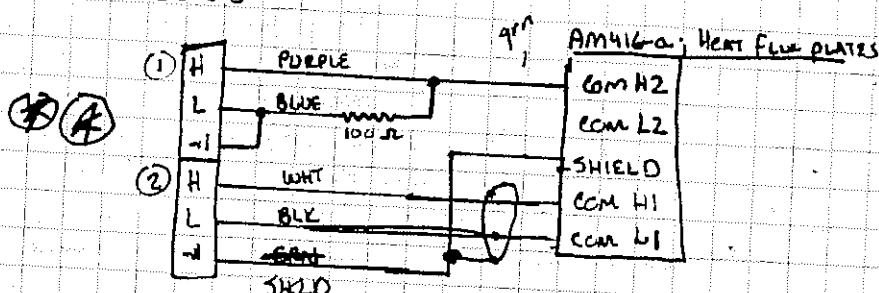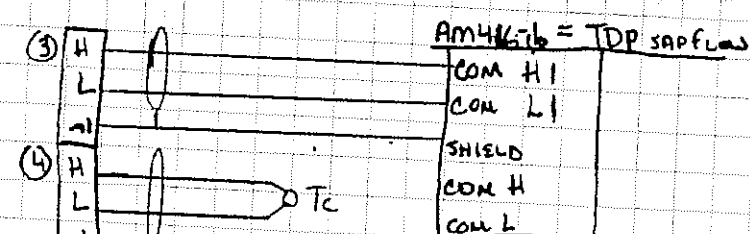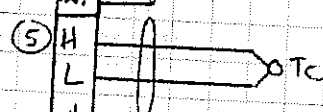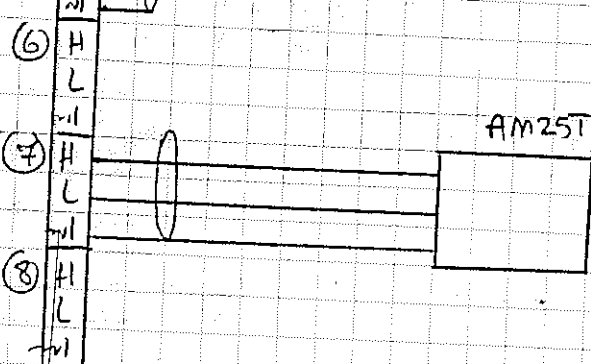

### CONTROL I/O

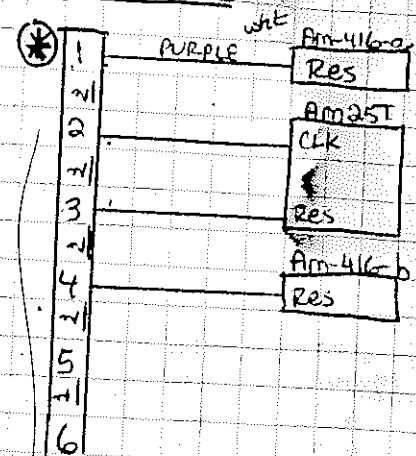

### POWER

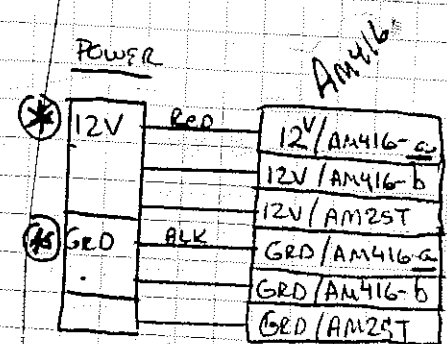

21x

### EXCITE

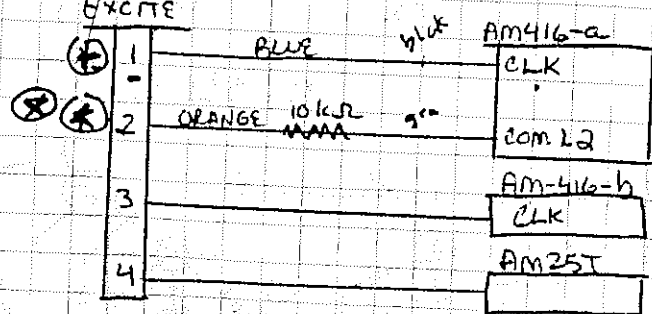

# VAISALA RH/Temp sensor HMP350

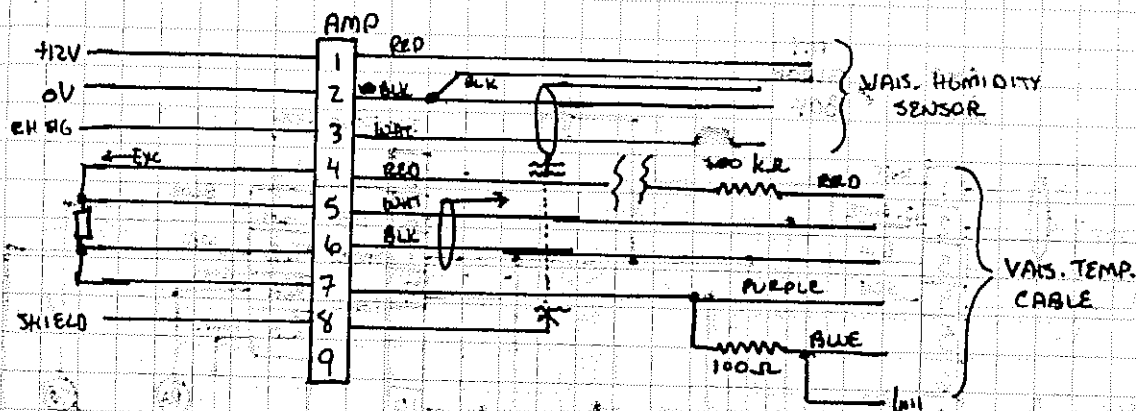

|   | COLOR | CABLE          |
|---|-------|----------------|
| 1 | RED   | R <sub>A</sub> |
| 2 | BLK   | R <sub>B</sub> |
| 3 | GRN   | T <sub>A</sub> |
| 4 | BLK   | T <sub>B</sub> |

## BASIC CAMPBELL DATA LOGGER TO DUCK CONNECTION - USING BLACK BOX

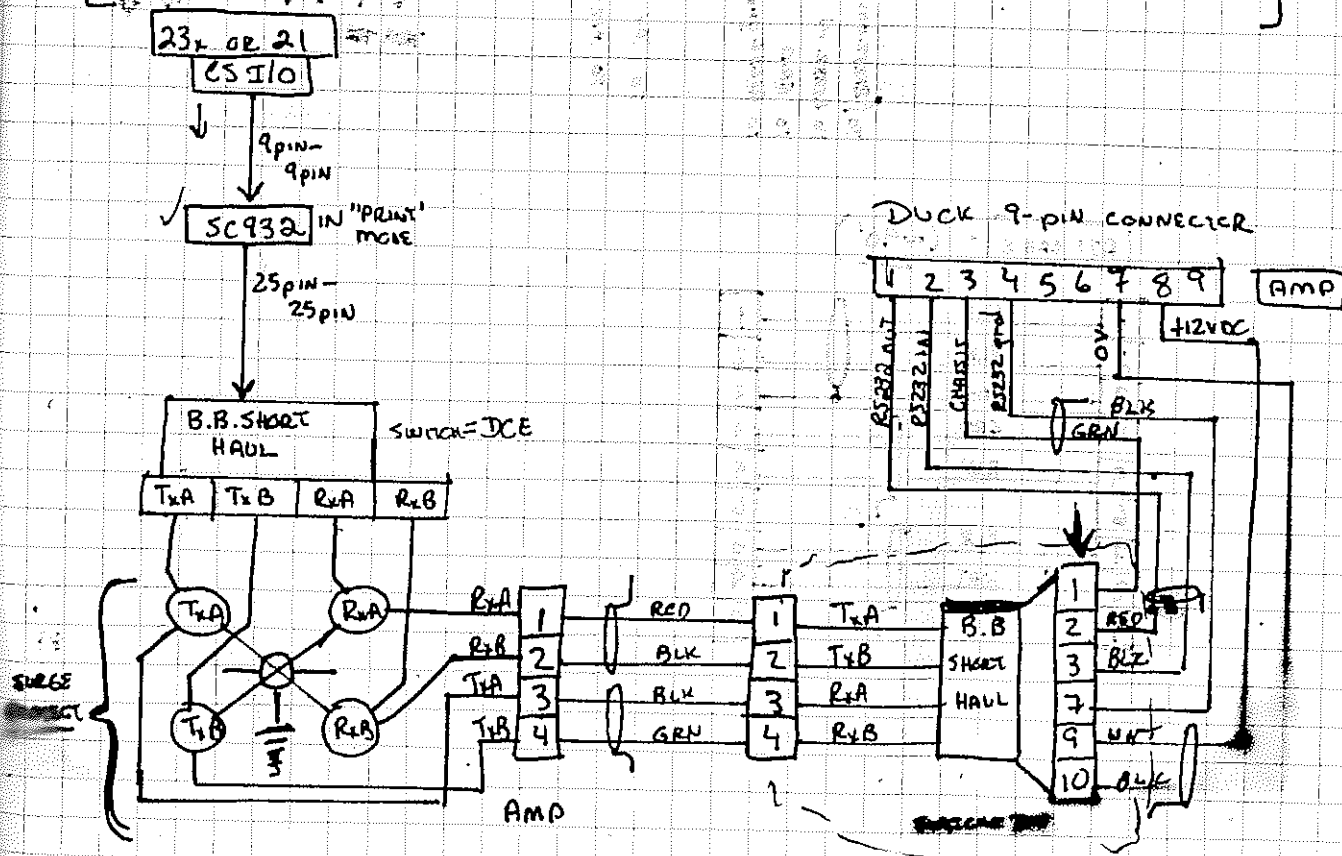

# NEW ATI SONIC

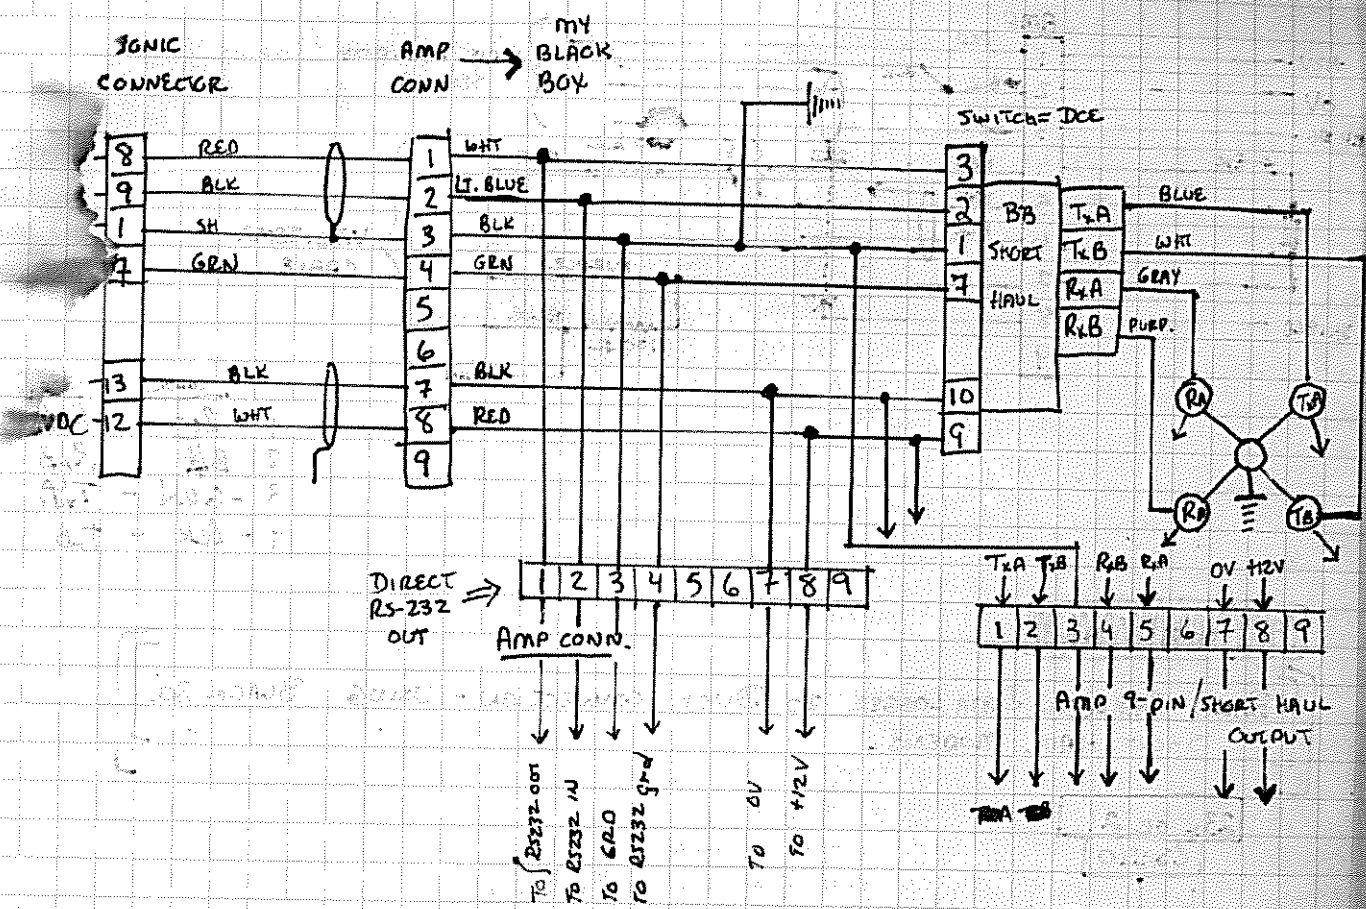

## ATI CABLE (~90')

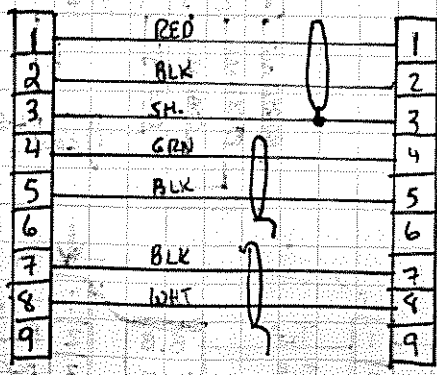

ATI SONIC: SHORE HALL AT DUCK END:

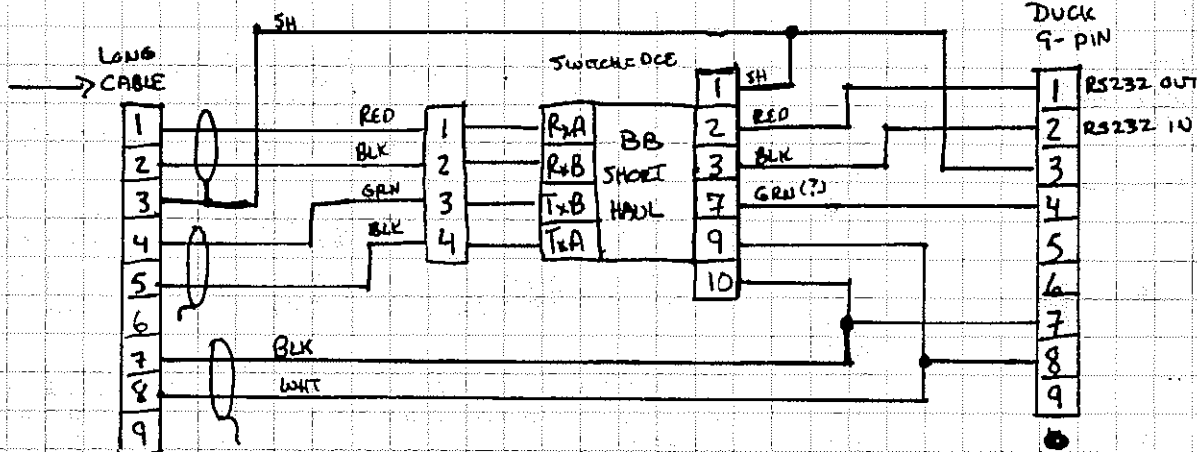



?? see pg 3-2 should be  $F(V \frac{P_0}{P})$

# LI-6251 CO<sub>2</sub> ANALYZER CALIBRATION DATA

DATE: 19 Nov 1996

Serial Number IRG1-362

Technician \_\_\_\_\_

Calibration Function: CO<sub>2</sub> =  $F(v P/P_0) [(T + 273)/(T_0 + 273)]$  where  $F(v) = [a_1 v + a_2 v^2 + a_3 v^3]$

$308.95 K$   
 $T_0 = 35.8$

$K = 18200$

$P_0 = 101.3 kPa$

Low Range (0 - 1000 ppm)

$a_1 = .1387$

$a_2 = 2.085E-05$

$a_3 = 2.176E-09$

High Range (0 - 3000 ppm)

$a_1 = .1457$

$a_2 = 1.686E-05$

$a_3 = 2.642E-09$

$$CO_2 \frac{T_0}{T} = V \frac{P_0}{P}$$

In the table below, V is signal in mV, PPM = F(v), SLOPE = dF(v)/dv, and G = (1 - v/K).

| V   | PPM   | SLOPE | G     | V    | PPM   | SLOPE | G     | V    | PPM   | SLOPE | G     | V    | PPM    | SLOPE | G     |
|-----|-------|-------|-------|------|-------|-------|-------|------|-------|-------|-------|------|--------|-------|-------|
| 0   | 0.0   | 0.139 | 1.000 | 1000 | 161.7 | 0.187 | 0.945 | 2000 | 378.2 | 0.248 | 0.890 | 3000 | 662.5  | 0.323 | 0.835 |
| 20  | 2.8   | 0.140 | 0.999 | 1020 | 165.5 | 0.188 | 0.944 | 2020 | 383.2 | 0.250 | 0.889 | 3020 | 669.0  | 0.324 | 0.834 |
| 40  | 5.6   | 0.140 | 0.998 | 1040 | 169.2 | 0.189 | 0.943 | 2040 | 388.2 | 0.251 | 0.888 | 3040 | 675.5  | 0.326 | 0.833 |
| 60  | 8.4   | 0.141 | 0.997 | 1060 | 173.0 | 0.190 | 0.942 | 2060 | 393.2 | 0.252 | 0.887 | 3060 | 682.0  | 0.327 | 0.832 |
| 80  | 11.2  | 0.142 | 0.996 | 1080 | 176.8 | 0.191 | 0.941 | 2080 | 398.3 | 0.254 | 0.886 | 3080 | 688.6  | 0.329 | 0.831 |
| 100 | 14.1  | 0.143 | 0.995 | 1100 | 180.7 | 0.192 | 0.940 | 2100 | 403.4 | 0.255 | 0.885 | 3100 | 695.2  | 0.331 | 0.830 |
| 120 | 16.9  | 0.144 | 0.993 | 1120 | 184.5 | 0.194 | 0.938 | 2120 | 408.5 | 0.256 | 0.884 | 3120 | 701.8  | 0.332 | 0.829 |
| 140 | 19.8  | 0.145 | 0.992 | 1140 | 188.4 | 0.195 | 0.937 | 2140 | 413.6 | 0.258 | 0.882 | 3140 | 708.5  | 0.334 | 0.827 |
| 160 | 22.7  | 0.146 | 0.991 | 1160 | 192.3 | 0.196 | 0.936 | 2160 | 418.8 | 0.259 | 0.881 | 3160 | 715.2  | 0.336 | 0.826 |
| 180 | 25.7  | 0.146 | 0.990 | 1180 | 196.3 | 0.197 | 0.935 | 2180 | 424.0 | 0.261 | 0.880 | 3180 | 721.9  | 0.337 | 0.825 |
| 200 | 28.6  | 0.147 | 0.989 | 1200 | 200.2 | 0.198 | 0.934 | 2200 | 429.2 | 0.262 | 0.879 | 3200 | 728.7  | 0.339 | 0.824 |
| 220 | 31.5  | 0.148 | 0.988 | 1220 | 204.2 | 0.199 | 0.933 | 2220 | 434.5 | 0.263 | 0.878 | 3220 | 735.5  | 0.341 | 0.823 |
| 240 | 34.5  | 0.149 | 0.987 | 1240 | 208.2 | 0.200 | 0.932 | 2240 | 439.8 | 0.265 | 0.877 | 3240 | 742.3  | 0.342 | 0.822 |
| 260 | 37.5  | 0.150 | 0.986 | 1260 | 212.2 | 0.202 | 0.931 | 2260 | 445.1 | 0.266 | 0.876 | 3260 | 749.1  | 0.344 | 0.821 |
| 280 | 40.5  | 0.151 | 0.985 | 1280 | 216.3 | 0.203 | 0.930 | 2280 | 450.4 | 0.268 | 0.875 | 3280 | 756.0  | 0.346 | 0.820 |
| 300 | 43.5  | 0.152 | 0.984 | 1300 | 220.3 | 0.204 | 0.929 | 2300 | 455.8 | 0.269 | 0.874 | 3300 | 763.0  | 0.347 | 0.819 |
| 320 | 46.6  | 0.153 | 0.982 | 1320 | 224.4 | 0.205 | 0.927 | 2320 | 461.2 | 0.271 | 0.873 | 3320 | 769.9  | 0.349 | 0.818 |
| 340 | 49.7  | 0.154 | 0.981 | 1340 | 228.5 | 0.206 | 0.926 | 2340 | 466.6 | 0.272 | 0.871 | 3340 | 776.9  | 0.351 | 0.816 |
| 360 | 52.7  | 0.155 | 0.980 | 1360 | 232.7 | 0.207 | 0.925 | 2360 | 472.1 | 0.273 | 0.870 | 3360 | 784.0  | 0.353 | 0.815 |
| 380 | 55.8  | 0.155 | 0.979 | 1380 | 236.8 | 0.209 | 0.924 | 2380 | 477.5 | 0.275 | 0.869 | 3380 | 791.0  | 0.354 | 0.814 |
| 400 | 59.0  | 0.156 | 0.978 | 1400 | 241.0 | 0.210 | 0.923 | 2400 | 483.1 | 0.276 | 0.868 | 3400 | 798.1  | 0.356 | 0.813 |
| 420 | 62.1  | 0.157 | 0.977 | 1420 | 245.2 | 0.211 | 0.922 | 2420 | 488.6 | 0.278 | 0.867 | 3420 | 805.3  | 0.358 | 0.812 |
| 440 | 65.2  | 0.158 | 0.976 | 1440 | 249.5 | 0.212 | 0.921 | 2440 | 494.2 | 0.279 | 0.866 | 3440 | 812.5  | 0.359 | 0.811 |
| 460 | 68.4  | 0.159 | 0.975 | 1460 | 253.7 | 0.213 | 0.920 | 2460 | 499.8 | 0.281 | 0.865 | 3460 | 819.7  | 0.361 | 0.810 |
| 480 | 71.6  | 0.160 | 0.974 | 1480 | 258.0 | 0.215 | 0.919 | 2480 | 505.4 | 0.282 | 0.864 | 3480 | 826.9  | 0.363 | 0.809 |
| 500 | 74.8  | 0.161 | 0.973 | 1500 | 262.3 | 0.216 | 0.918 | 2500 | 511.1 | 0.284 | 0.863 | 3500 | 834.2  | 0.365 | 0.808 |
| 520 | 78.1  | 0.162 | 0.971 | 1520 | 266.6 | 0.217 | 0.916 | 2520 | 516.8 | 0.285 | 0.862 | 3520 | 841.5  | 0.366 | 0.807 |
| 540 | 81.3  | 0.163 | 0.970 | 1540 | 271.0 | 0.218 | 0.915 | 2540 | 522.5 | 0.287 | 0.860 | 3540 | 848.8  | 0.368 | 0.805 |
| 560 | 84.6  | 0.164 | 0.969 | 1560 | 275.4 | 0.220 | 0.914 | 2560 | 528.2 | 0.288 | 0.859 | 3560 | 856.2  | 0.370 | 0.804 |
| 580 | 87.9  | 0.165 | 0.968 | 1580 | 279.8 | 0.221 | 0.913 | 2580 | 534.0 | 0.290 | 0.858 | 3580 | 863.6  | 0.372 | 0.803 |
| 600 | 91.2  | 0.166 | 0.967 | 1600 | 284.2 | 0.222 | 0.912 | 2600 | 539.8 | 0.291 | 0.857 | 3600 | 871.1  | 0.373 | 0.802 |
| 620 | 94.5  | 0.167 | 0.966 | 1620 | 288.7 | 0.223 | 0.911 | 2620 | 545.7 | 0.293 | 0.856 | 3620 | 878.6  | 0.375 | 0.801 |
| 640 | 97.9  | 0.168 | 0.965 | 1640 | 293.1 | 0.225 | 0.910 | 2640 | 551.5 | 0.294 | 0.855 | 3640 | 886.1  | 0.377 | 0.800 |
| 660 | 101.2 | 0.169 | 0.964 | 1660 | 297.6 | 0.226 | 0.909 | 2660 | 557.4 | 0.296 | 0.854 | 3660 | 893.6  | 0.379 | 0.799 |
| 680 | 104.6 | 0.170 | 0.963 | 1680 | 302.2 | 0.227 | 0.908 | 2680 | 563.4 | 0.297 | 0.853 | 3680 | 901.2  | 0.381 | 0.798 |
| 700 | 108.0 | 0.171 | 0.962 | 1700 | 306.7 | 0.228 | 0.907 | 2700 | 569.3 | 0.299 | 0.852 | 3700 | 908.9  | 0.382 | 0.797 |
| 720 | 111.5 | 0.172 | 0.960 | 1720 | 311.3 | 0.230 | 0.905 | 2720 | 575.3 | 0.300 | 0.851 | 3720 | 916.5  | 0.384 | 0.796 |
| 740 | 114.9 | 0.173 | 0.959 | 1740 | 315.9 | 0.231 | 0.904 | 2740 | 581.3 | 0.302 | 0.849 | 3740 | 924.2  | 0.386 | 0.795 |
| 760 | 118.4 | 0.174 | 0.958 | 1760 | 320.6 | 0.232 | 0.903 | 2760 | 587.4 | 0.304 | 0.848 | 3760 | 932.0  | 0.388 | 0.793 |
| 780 | 121.9 | 0.175 | 0.957 | 1780 | 325.2 | 0.234 | 0.902 | 2780 | 593.5 | 0.305 | 0.847 | 3780 | 939.7  | 0.390 | 0.792 |
| 800 | 125.4 | 0.176 | 0.956 | 1800 | 329.9 | 0.235 | 0.901 | 2800 | 599.6 | 0.307 | 0.846 | 3800 | 947.6  | 0.391 | 0.791 |
| 820 | 128.9 | 0.177 | 0.955 | 1820 | 334.6 | 0.236 | 0.900 | 2820 | 605.7 | 0.308 | 0.845 | 3820 | 955.4  | 0.393 | 0.790 |
| 840 | 132.5 | 0.178 | 0.954 | 1840 | 339.3 | 0.238 | 0.899 | 2840 | 611.9 | 0.310 | 0.844 | 3840 | 963.3  | 0.395 | 0.789 |
| 860 | 136.1 | 0.179 | 0.953 | 1860 | 344.1 | 0.239 | 0.898 | 2860 | 618.1 | 0.311 | 0.843 | 3860 | 971.2  | 0.397 | 0.788 |
| 880 | 139.7 | 0.180 | 0.952 | 1880 | 348.9 | 0.240 | 0.897 | 2880 | 624.4 | 0.313 | 0.842 | 3880 | 979.2  | 0.399 | 0.787 |
| 900 | 143.3 | 0.182 | 0.951 | 1900 | 353.7 | 0.242 | 0.896 | 2900 | 630.7 | 0.315 | 0.841 | 3900 | 987.2  | 0.401 | 0.786 |
| 920 | 146.9 | 0.183 | 0.949 | 1920 | 358.6 | 0.243 | 0.895 | 2920 | 637.0 | 0.316 | 0.840 | 3920 | 995.2  | 0.403 | 0.785 |
| 940 | 150.6 | 0.184 | 0.948 | 1940 | 363.4 | 0.244 | 0.893 | 2940 | 643.3 | 0.318 | 0.838 | 3940 | 1003.3 | 0.404 | 0.784 |
| 960 | 154.3 | 0.185 | 0.947 | 1960 | 368.3 | 0.246 | 0.892 | 2960 | 649.7 | 0.319 | 0.837 | 3960 | 1011.4 | 0.406 | 0.782 |
| 980 | 158.0 | 0.186 | 0.946 | 1980 | 373.3 | 0.247 | 0.891 | 2980 | 656.1 | 0.321 | 0.836 | 3980 | 1019.5 | 0.408 | 0.781 |

**LI-COR**

LI-COR, Inc. • 4421 Superior Street • P.O. Box 4425 • Lincoln, Nebraska 68504 USA  
Phone: (402) 467-3576 • Fax: 402-467-2819 • Toll Free in the U.S. & Canada: 1-800-447-3576

# CO<sub>2</sub> Eddy Covariance System PLUMBING DIAGRAM

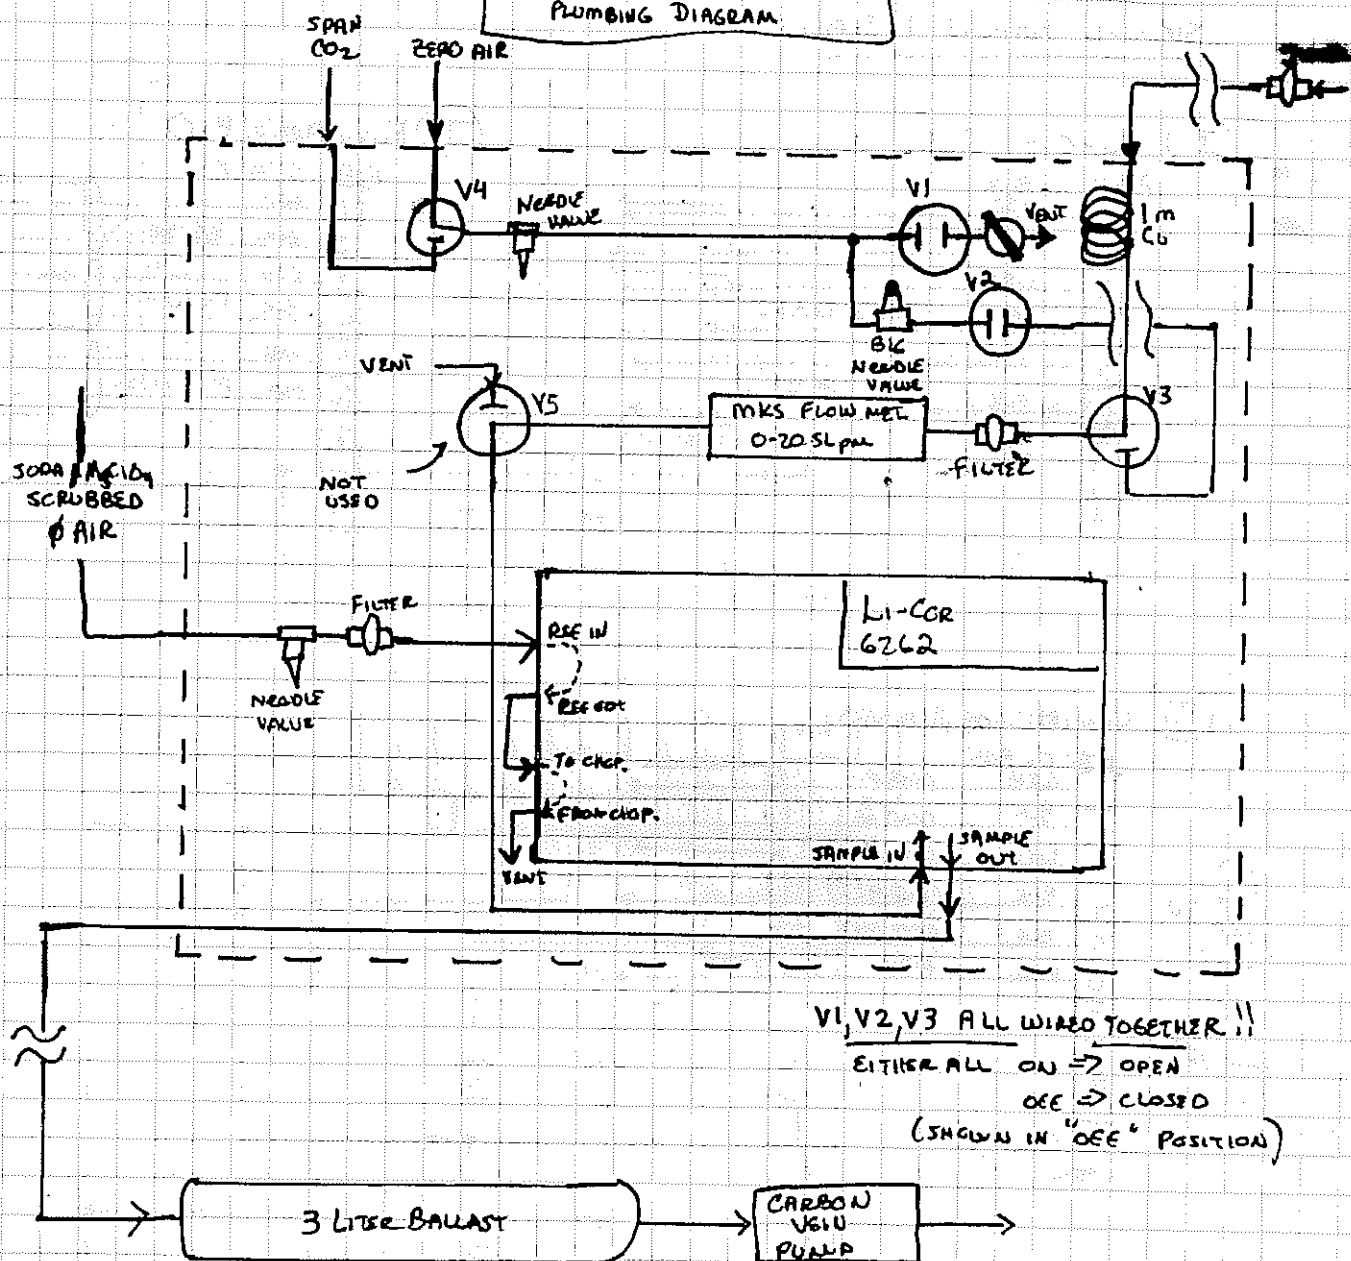

V1 => CALIBRATE/VENT  
 V2 => CALIBRATE SHUTOFF  
 V3 => SAMPLE/CALIBRATE  
 V4 => ZERO/SPAN  
 V5 => VENT (ZERO FLOW METER)

# EDDY CORRELATION

## SIGNAL OUTPUTS & CABLES

### (F) 4-COR 6262 OUTPUTS

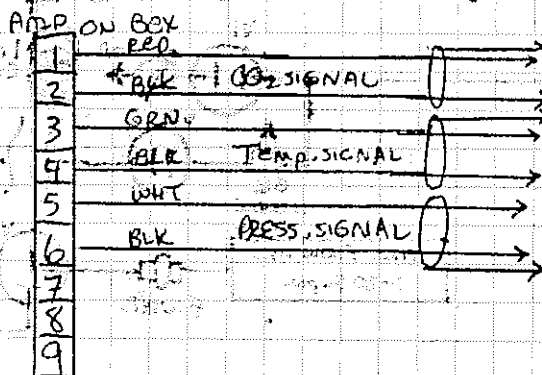

### (IV) FLOW METER / H<sub>2</sub>O

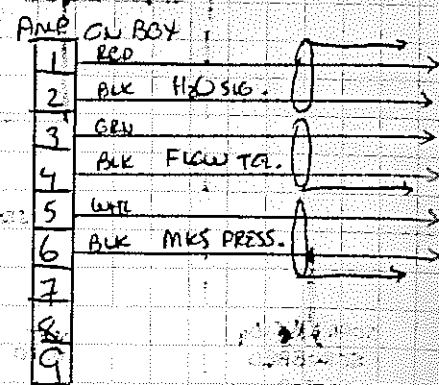

### (III) CONTROL OF VALVES

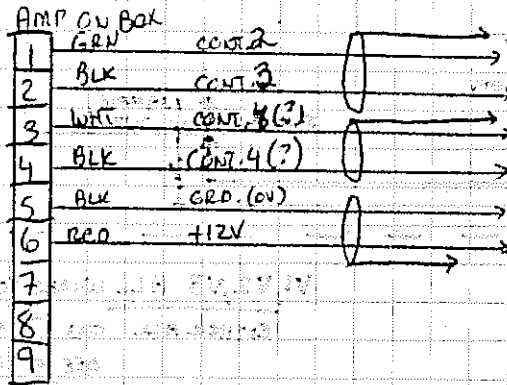

(?)  
NEED TO  
CHECK  
THIS  
CIRCUIT

45, Cent. Per.

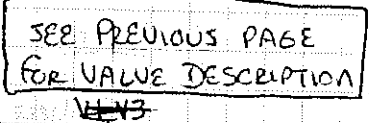

⊛ VALUES 1, 2 & 4 ALSO HAVE green  
gnd. WIRES

# ENTRY CORRELATION

## SIGNAL OUTPUTS & CABLES

### (I) 11-CAB G202 OUTPUTS

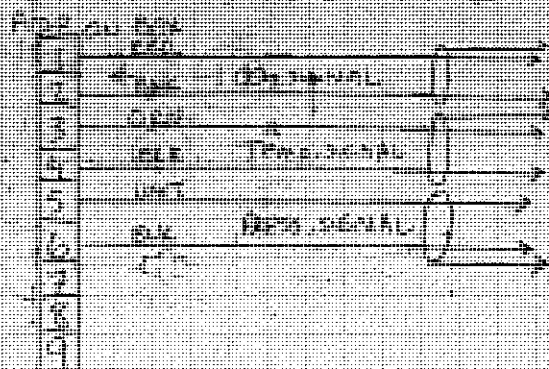

### (II) Furnace/H<sub>2</sub>O

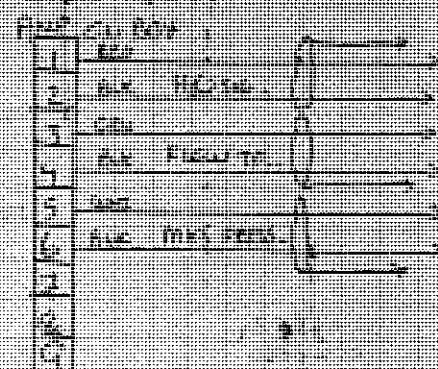

### (III) CONTROL OF VALVES

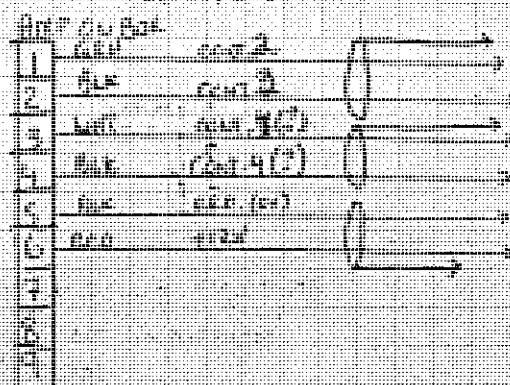

(2)  
NEED TO  
CHECK  
THIS  
CAB



# EDDY CORRELATION VALVE CONTROL

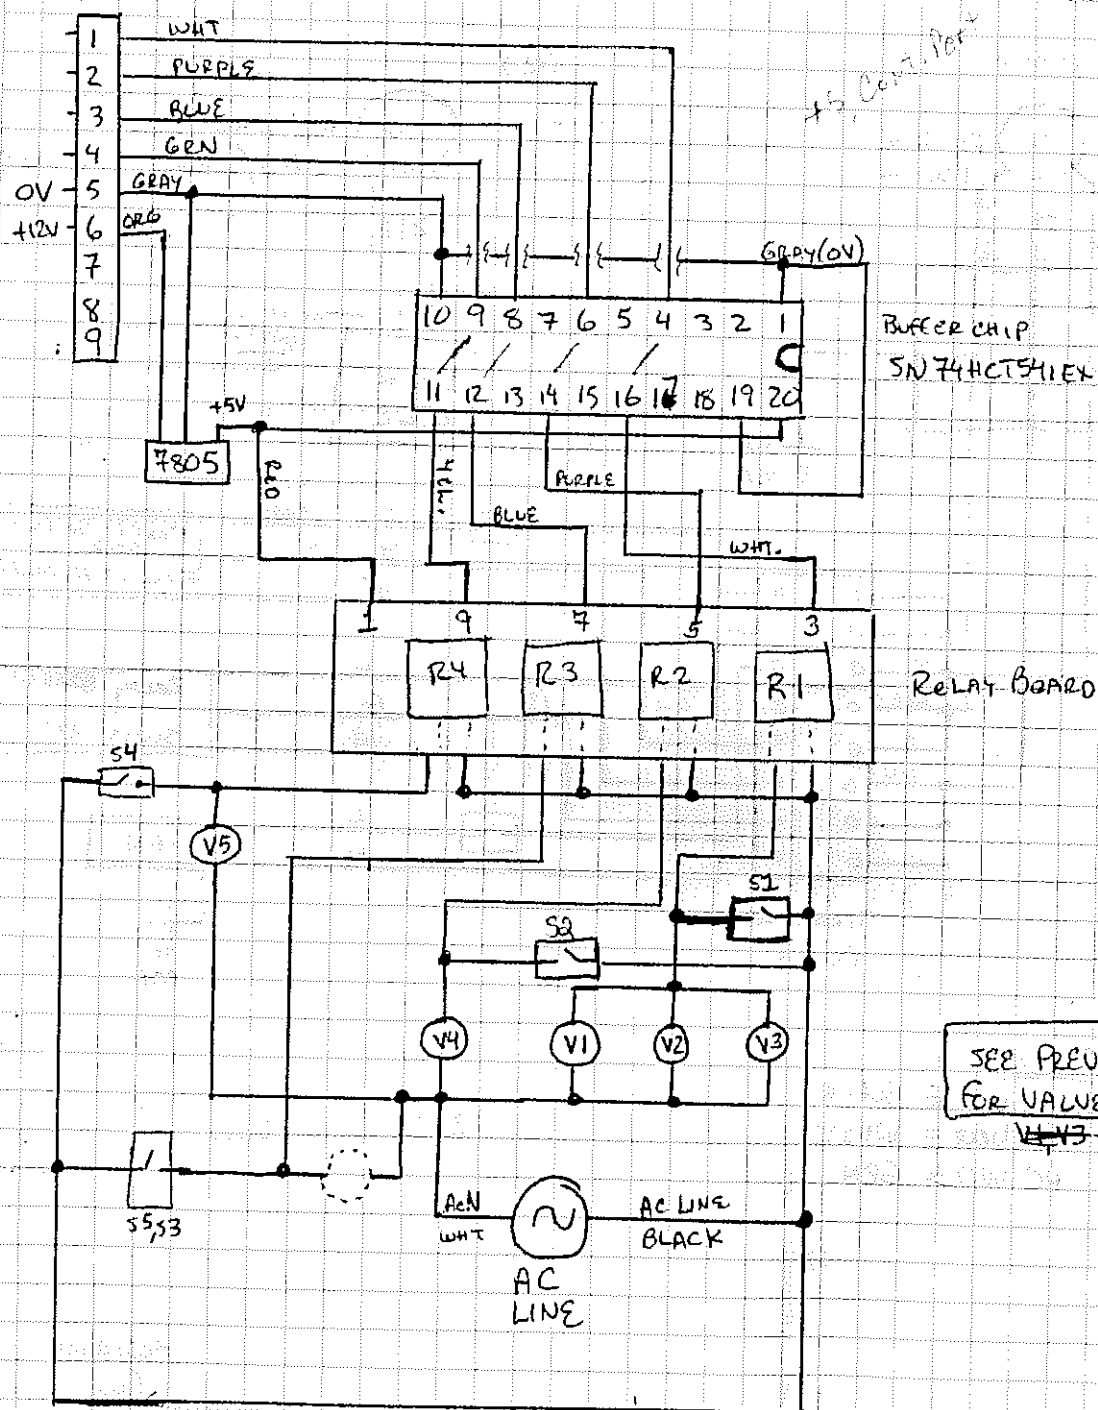

⊕ VALUES 1, 2 & 4 ALSO HAVE green  
gnd. WIRES

Six Different Levels

Plumbing Diagram

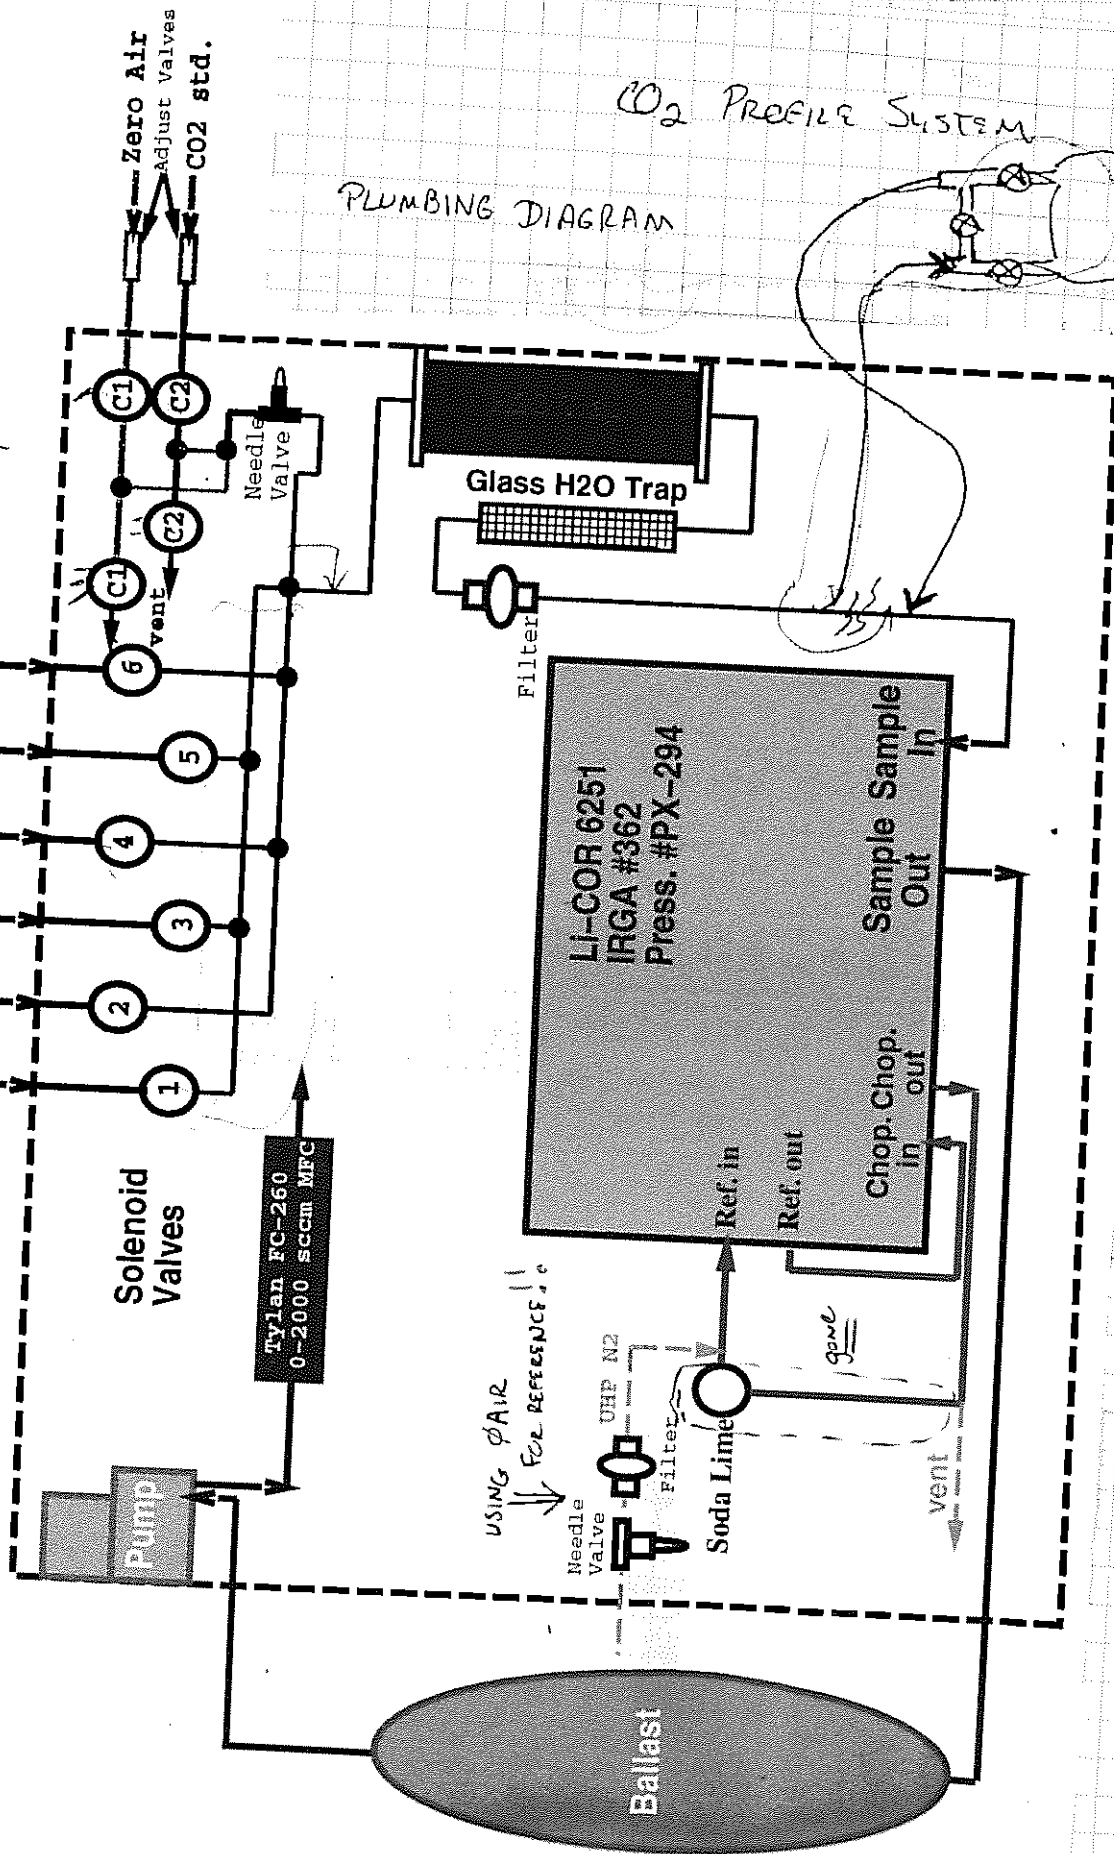

PROFILER  
INLETS

LICQF  
FILTERS

TO PROFILER  
BOX

INLET VALVES  
L1

L2

L3

L4

L5

L6

~8"

6-8ft

PUMP

VERT  
~35'  
INTO  
FOREST

72'

~10ft

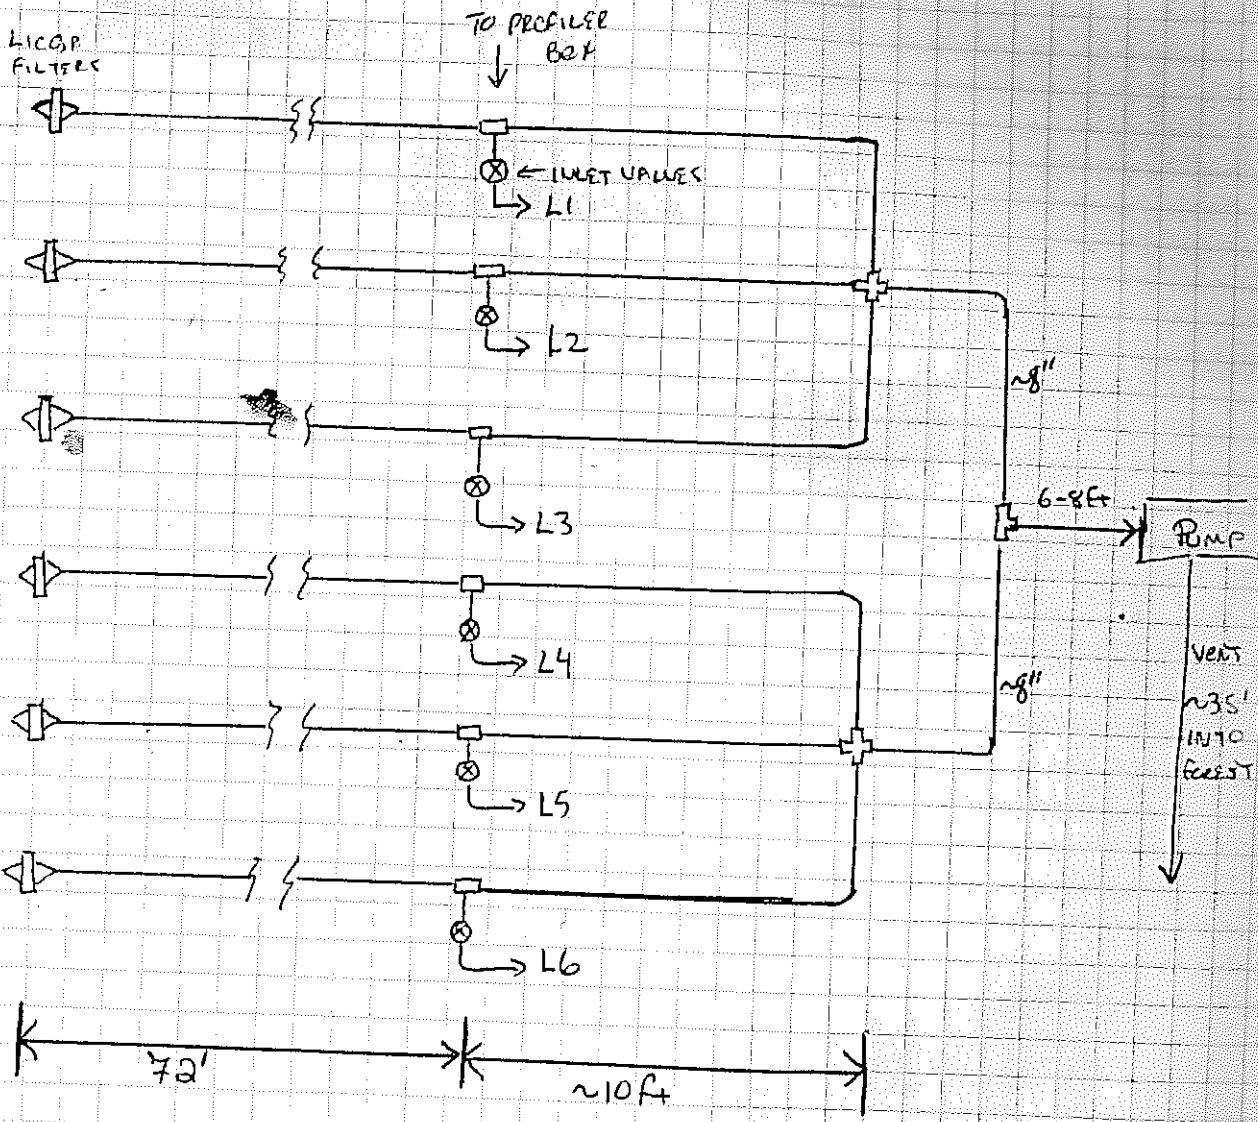

## CO2 Profiler

### AC Power Distribution

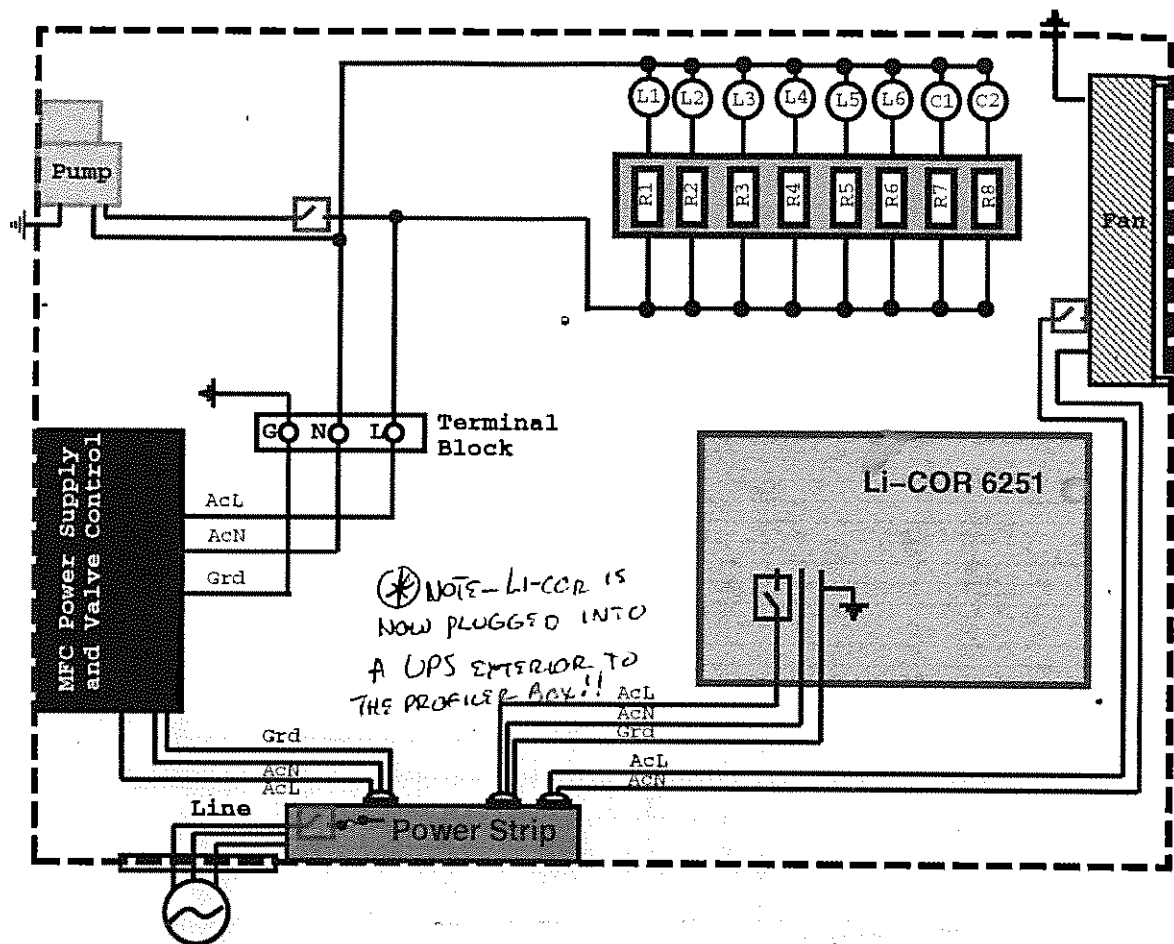

### Li-Cor Signals

### Amp connector

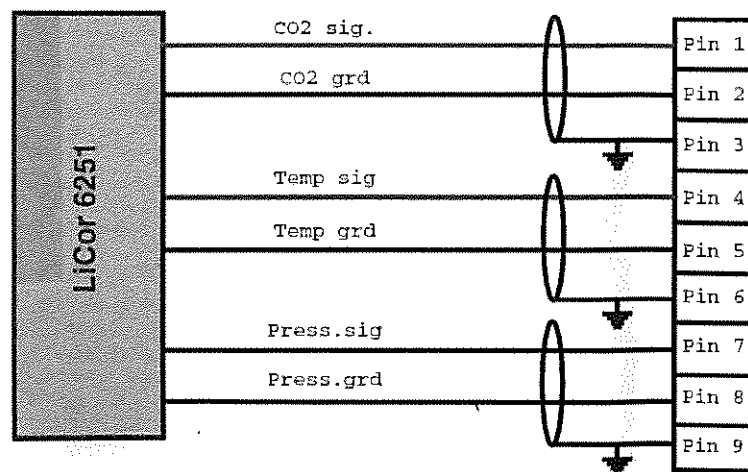

note-shields connected to box ground

TRIGGER - MASS FLOW CONTROLLER POWER SUPPLY

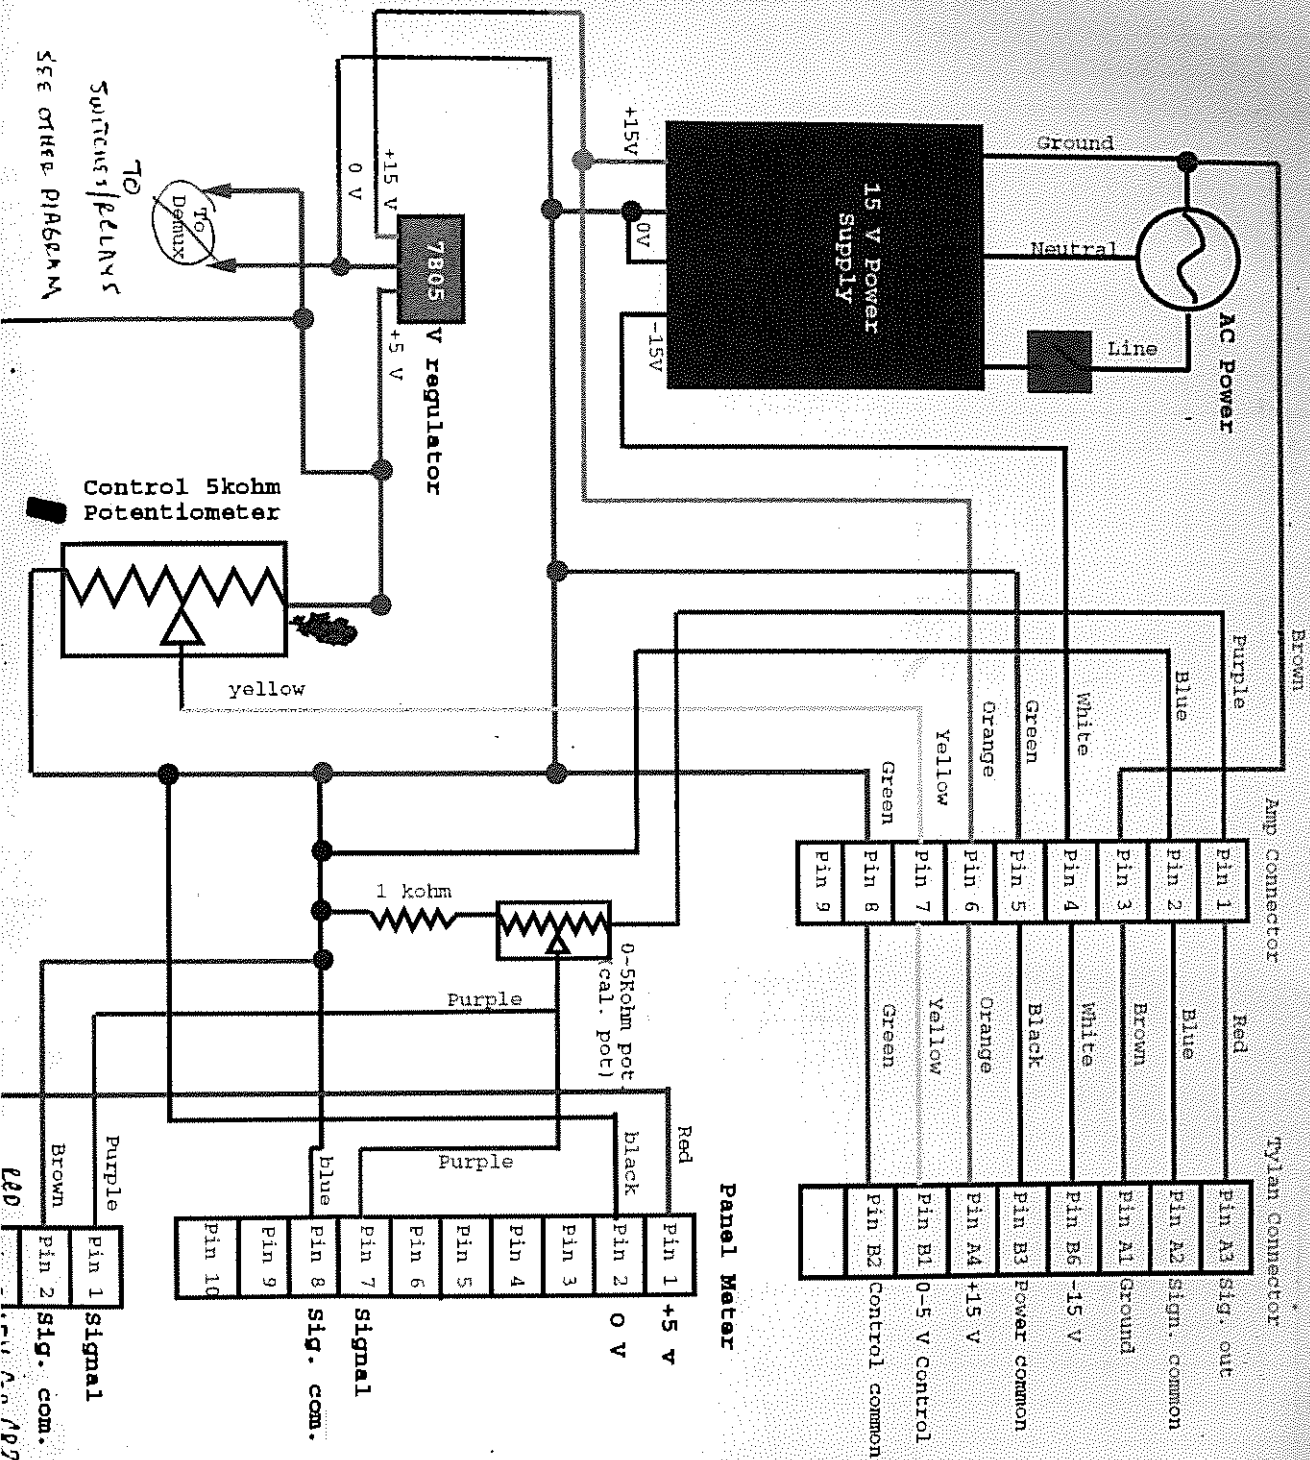

LED T-10 A-01073x



Logic Table:

| G1 | G2a | G2b | C<br>(C4) | B<br>(C5) | A<br>(C6) | Y0 | Y1 | Y2 | Y3 | Y4 | Y5 | Y6 | Y7 |
|----|-----|-----|-----------|-----------|-----------|----|----|----|----|----|----|----|----|
| L  | X   | X   | X         | X         | X         | H  | H  | H  | H  | H  | H  | H  | H  |
| H  | L   | L   | L         | L         | L         | L  | L  | L  | L  | L  | L  | L  | L  |
| H  | L   | L   | L         | L         | H         | H  | H  | H  | H  | H  | H  | H  | H  |
| H  | L   | L   | L         | H         | L         | H  | H  | H  | H  | H  | H  | H  | H  |
| H  | L   | L   | L         | L         | L         | H  | H  | L  | H  | H  | H  | H  | H  |
| H  | L   | L   | L         | L         | H         | H  | H  | H  | H  | L  | H  | H  | H  |
| H  | L   | L   | L         | H         | L         | H  | H  | H  | H  | H  | L  | H  | H  |
| H  | L   | L   | L         | H         | H         | H  | H  | H  | H  | H  | H  | L  | L  |
| H  | L   | L   | L         | H         | H         | H  | H  | H  | H  | H  | H  | H  | L  |

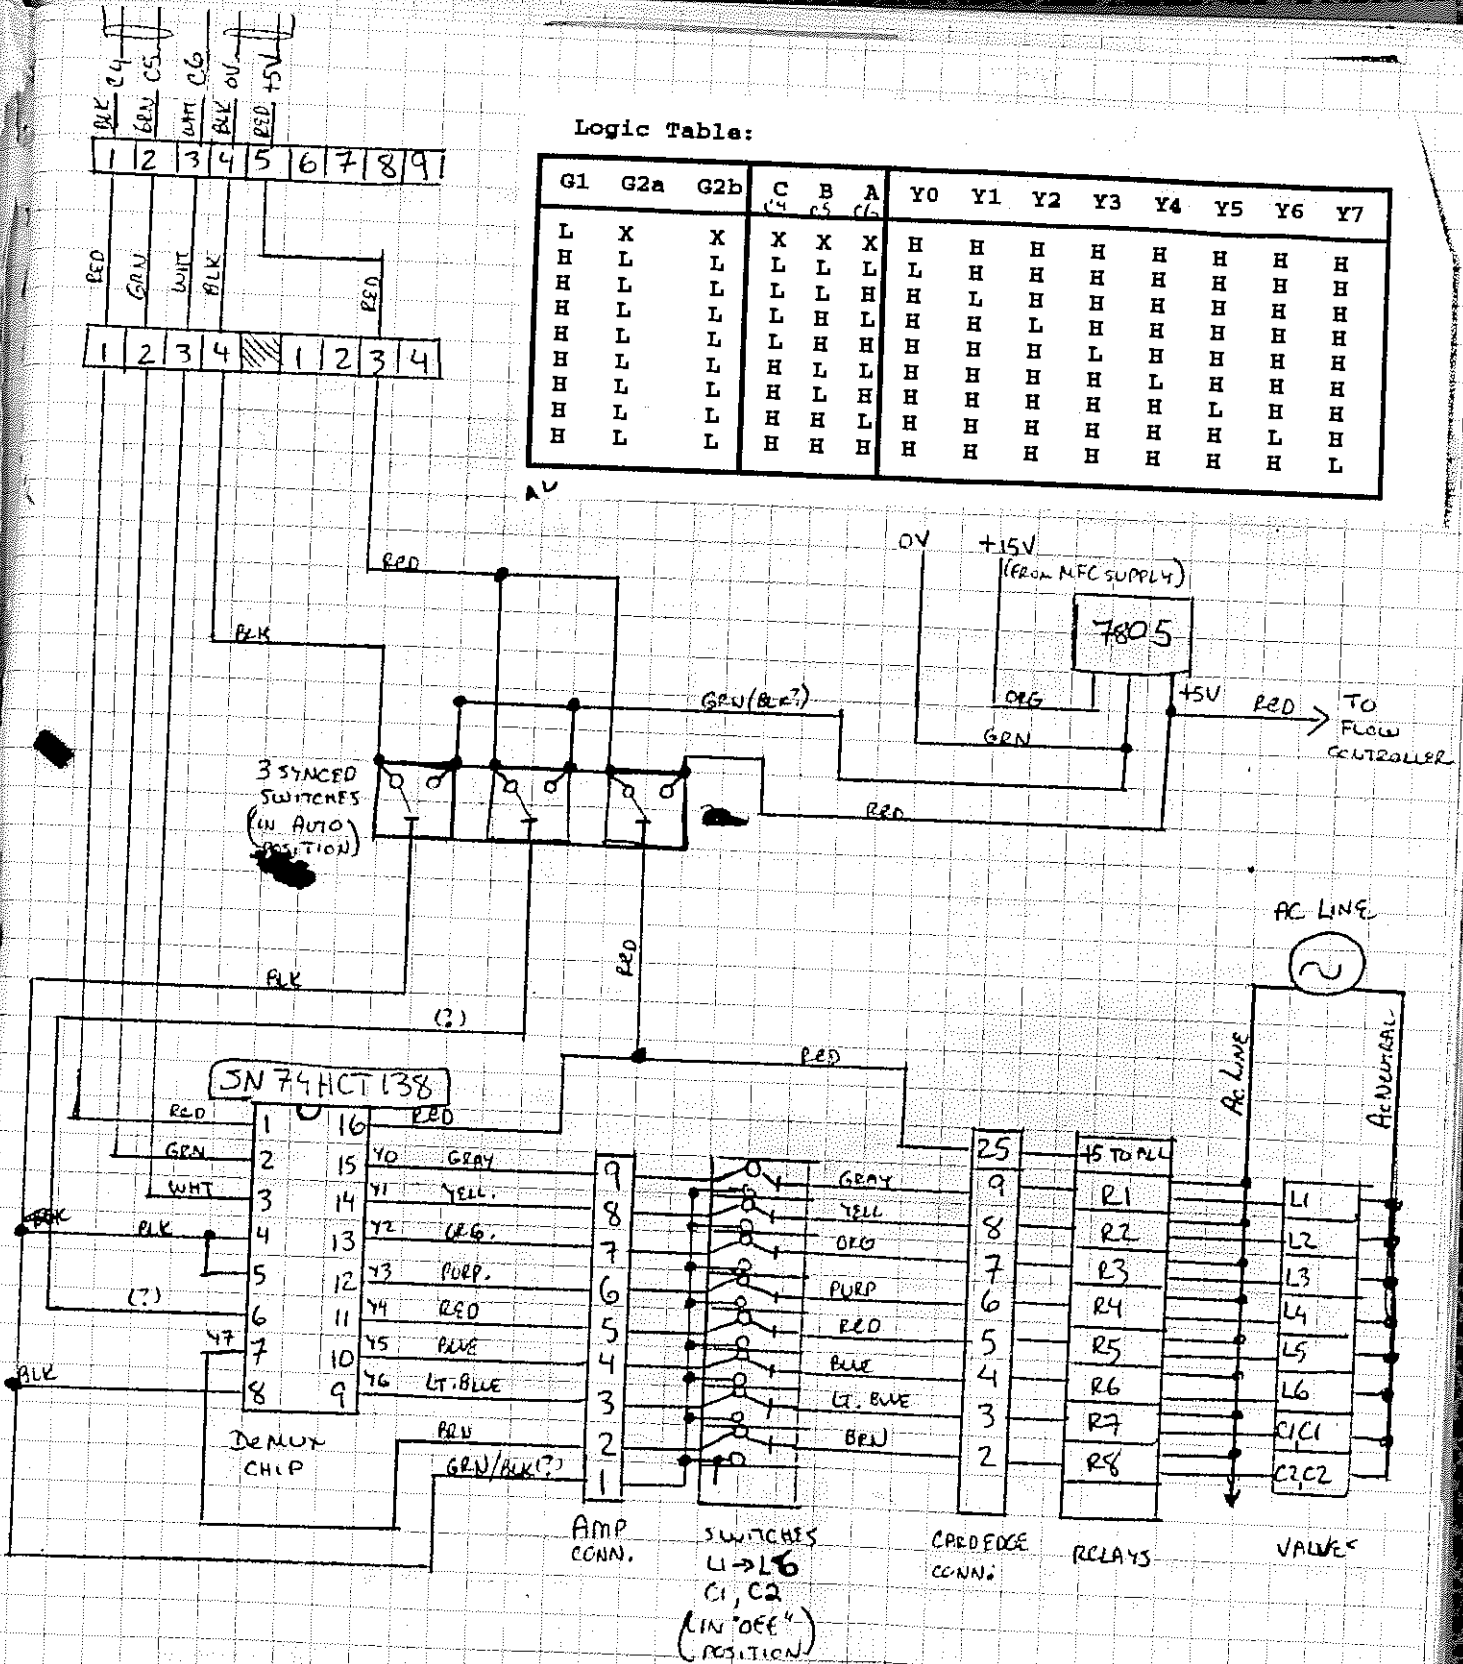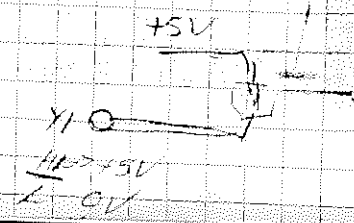

# 3/8/77 - JUNCTION BOX FOR NET RELIOMETER SIGNALS

Inputs - Amp 4-pin connectors

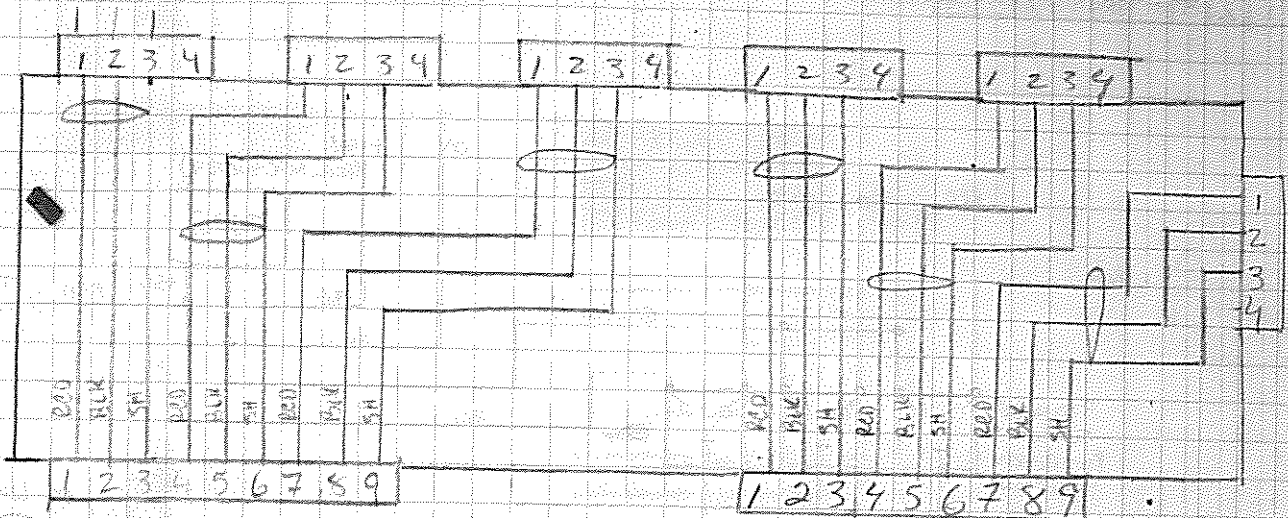

Outputs - Amp 9-pin conn.

## DC POWER SUPPLY

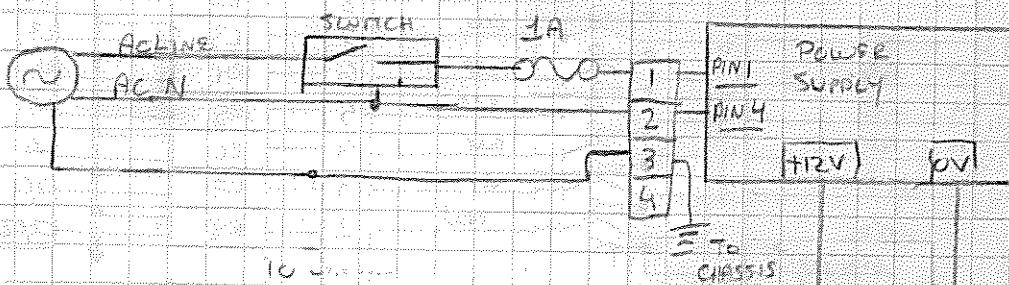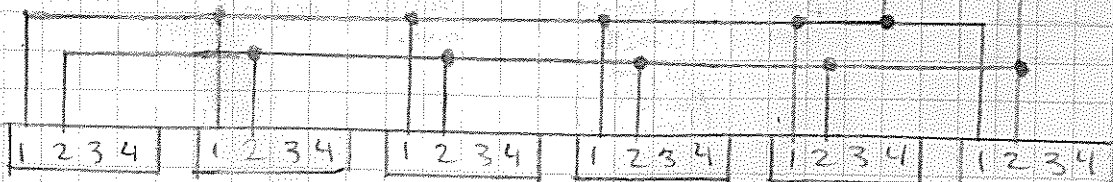

Outputs - Amp 4-pin connector  
PIN 1 : +12V  
PIN 2 : 0V

4/15/99

# Appl. Geomechanics CLINOMETERS MODEL 900

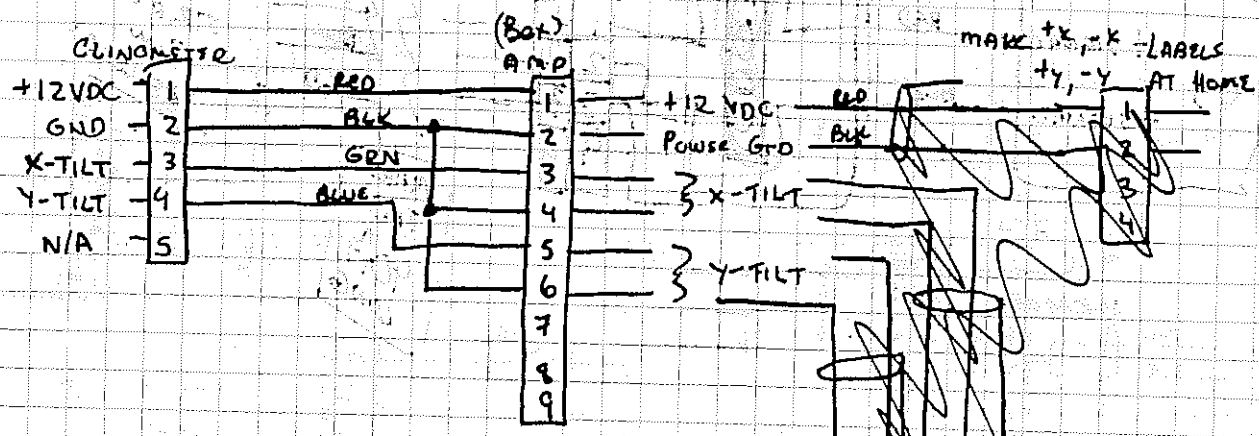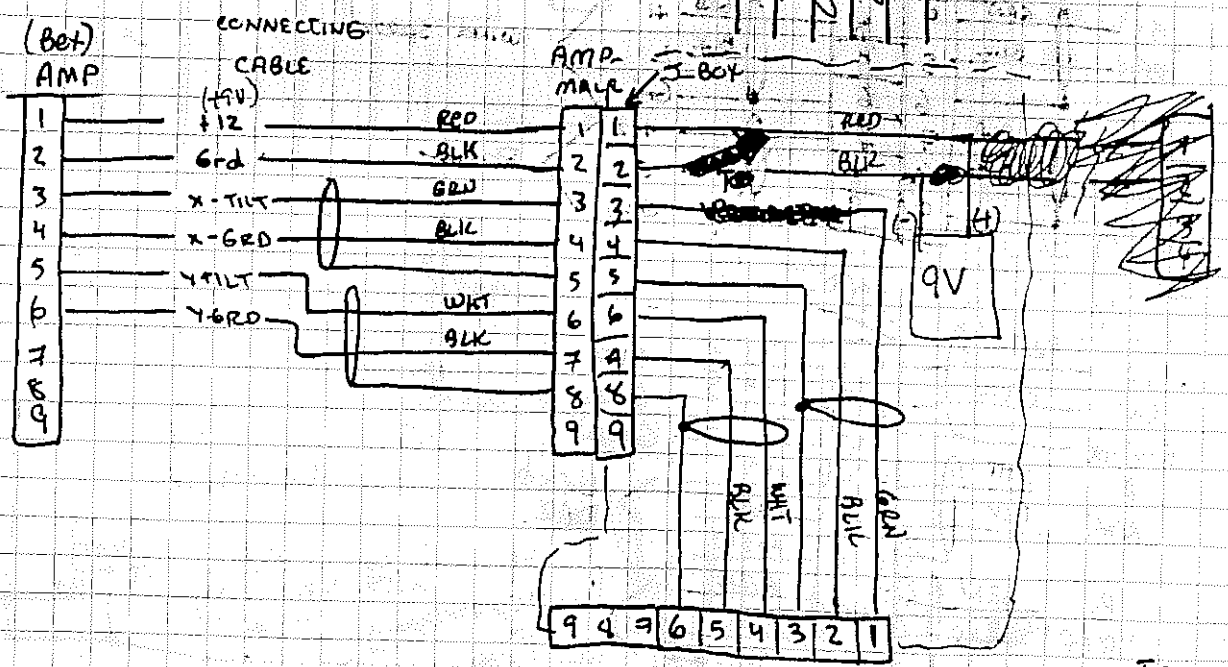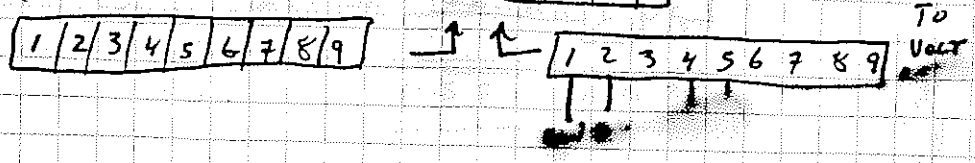

# TECO O<sub>3</sub> CABLE

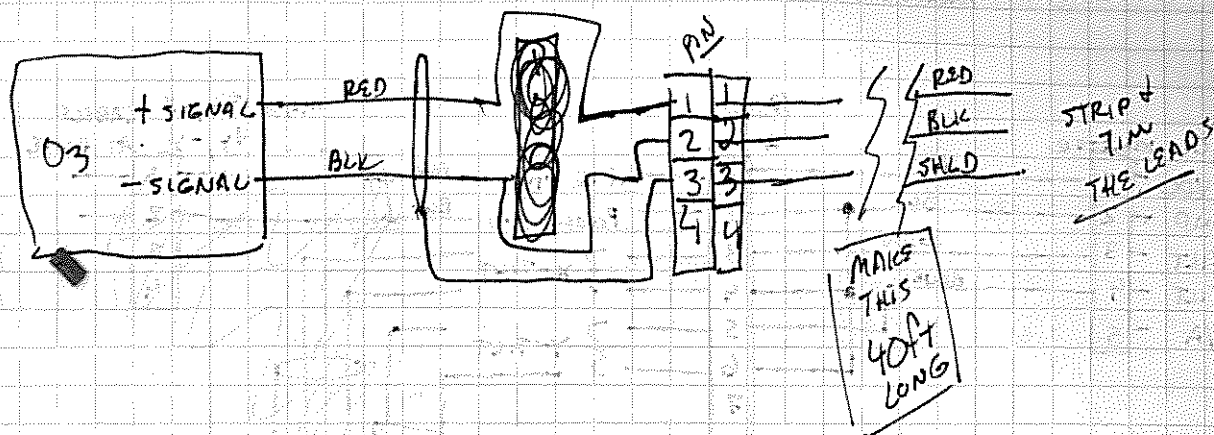

## RM Young Extension Cables: (Proprietary)

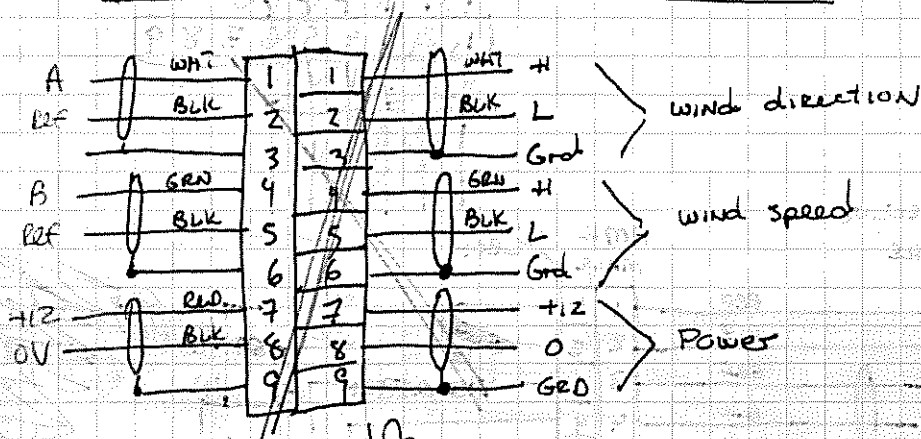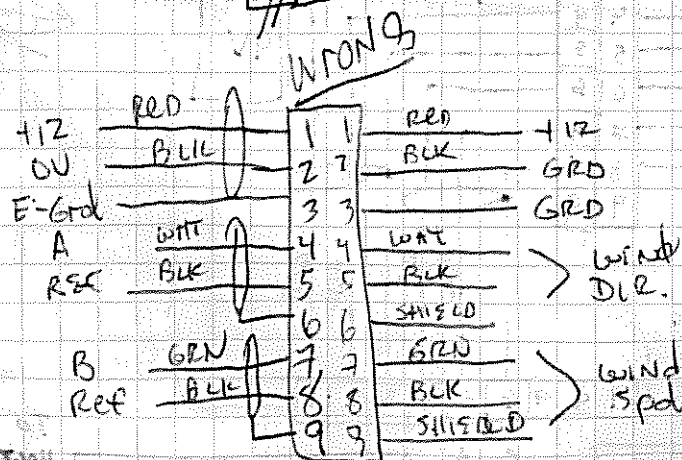



4/15/00 SECLOD FLOW CONTROLLER -

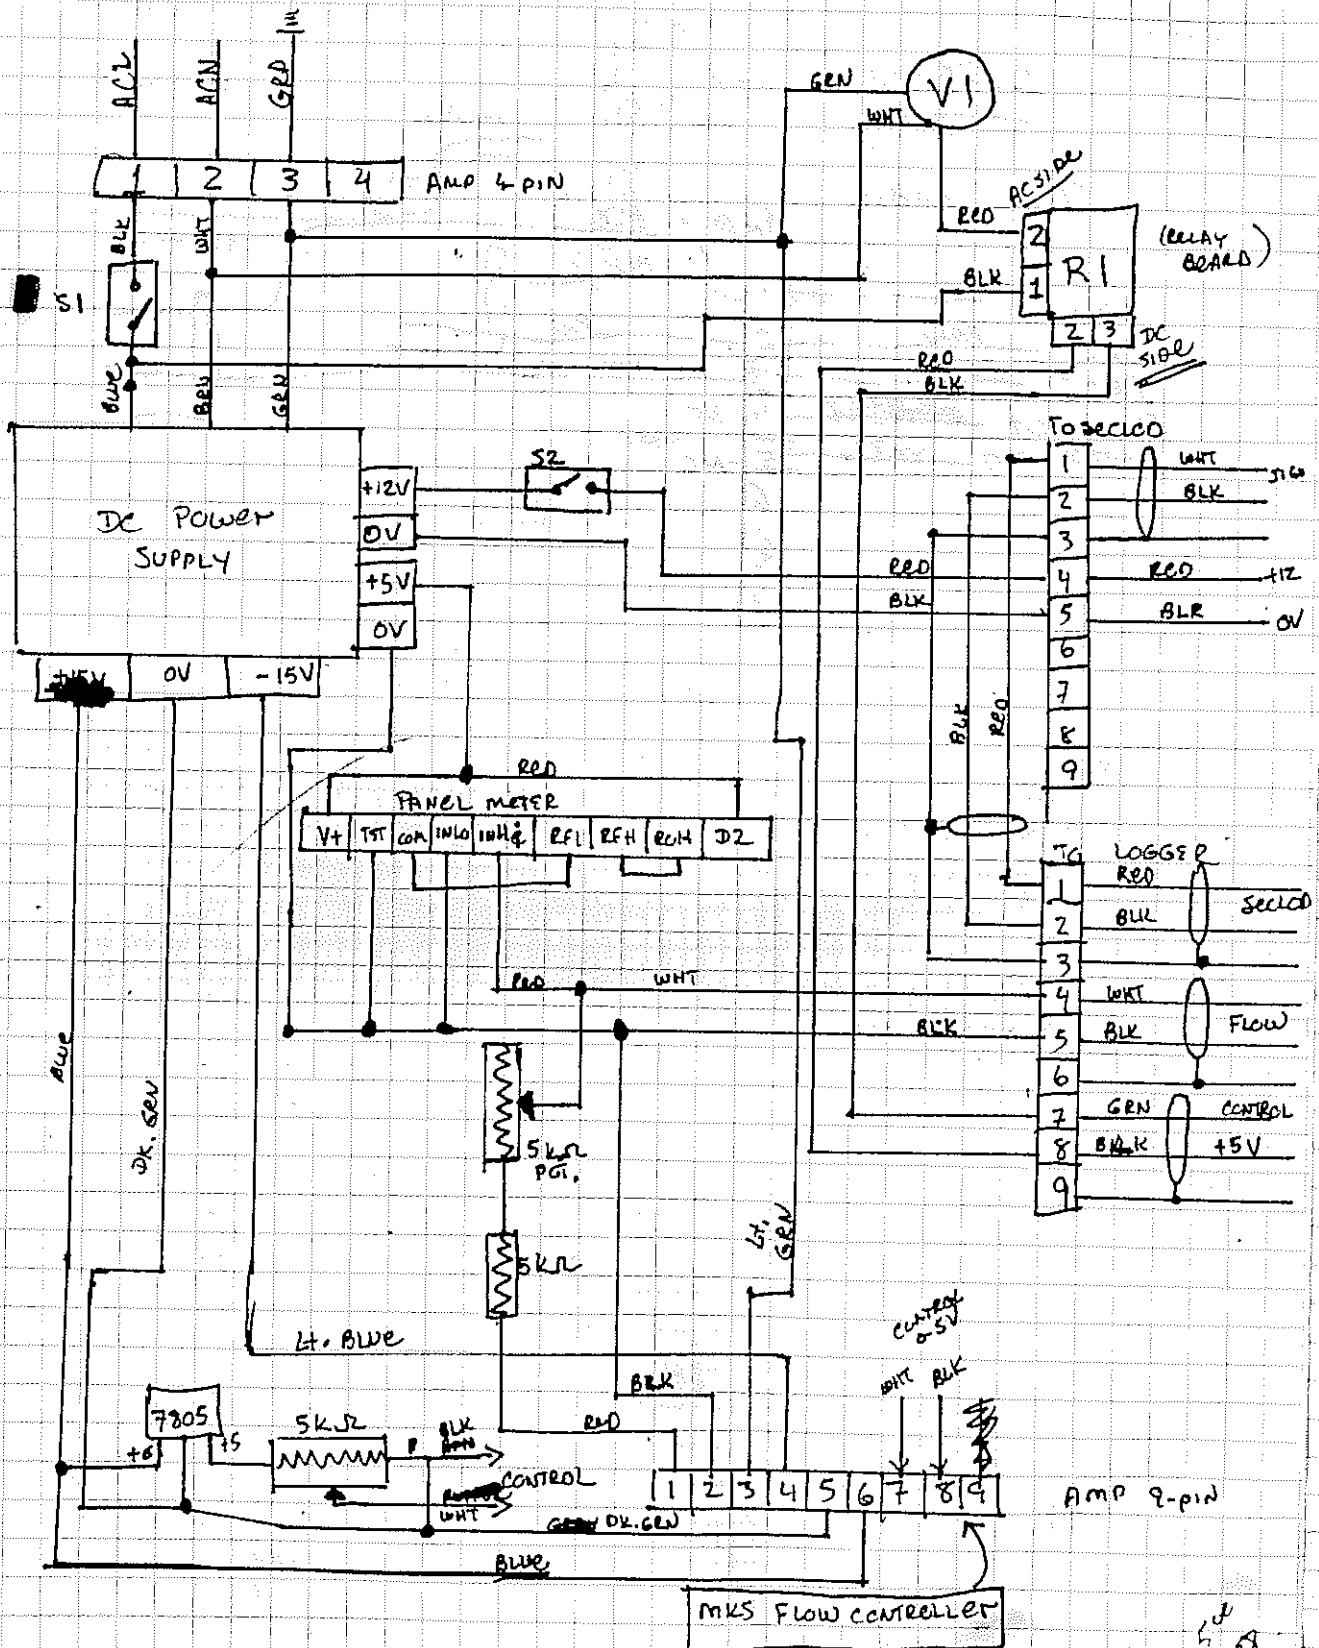



Li7500

DAC CABLE

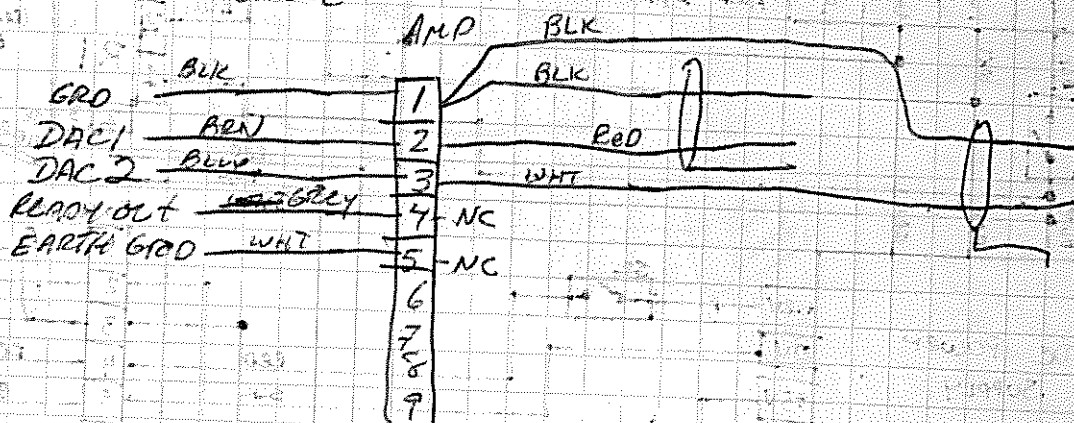

# CO<sub>2</sub> Injection system

PLUMBING

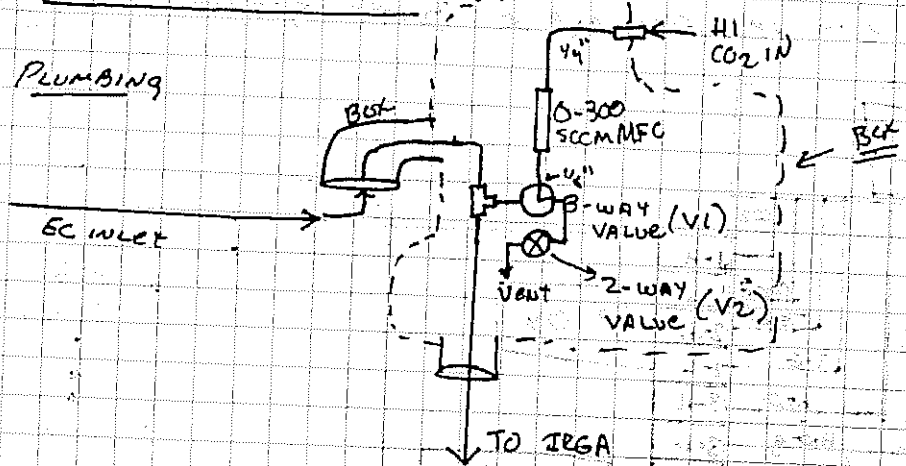

5/24/01

# Double Profile - Modification of Brett's system

ELECTRICAL

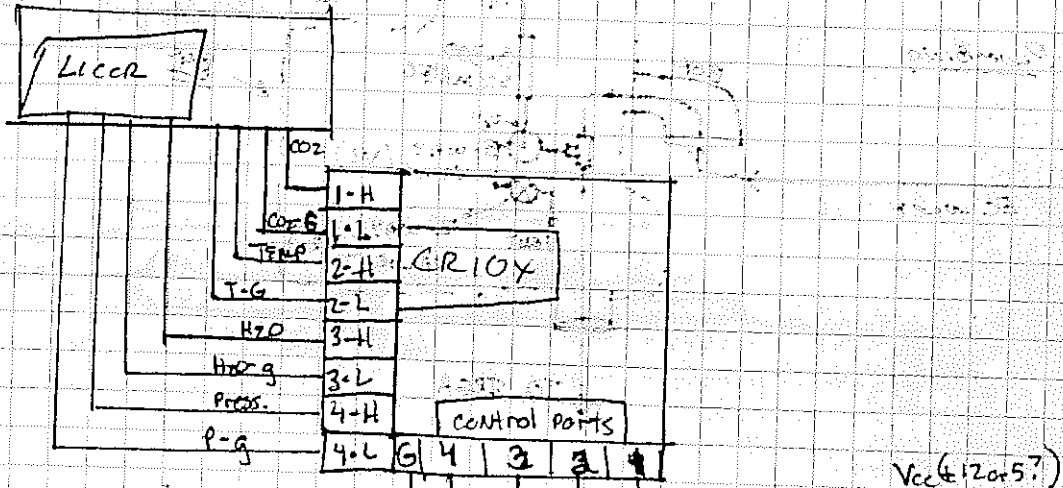

AMP CONNECTOR  
POWER

- |   |                         |
|---|-------------------------|
| 1 | — AC LINE               |
| 2 | — AC Neut.              |
| 3 | — AC (?) Back of valves |
| 4 | — GND                   |

AMP CONNECTOR  
SIGNALS

- |   |
|---|
| 1 |
| 2 |
| 3 |
| 4 |
| 5 |
| 6 |
| 7 |
| 8 |

3.5A  
36V  
7400  
1440V  
1680V  
378V  
36V  
36V

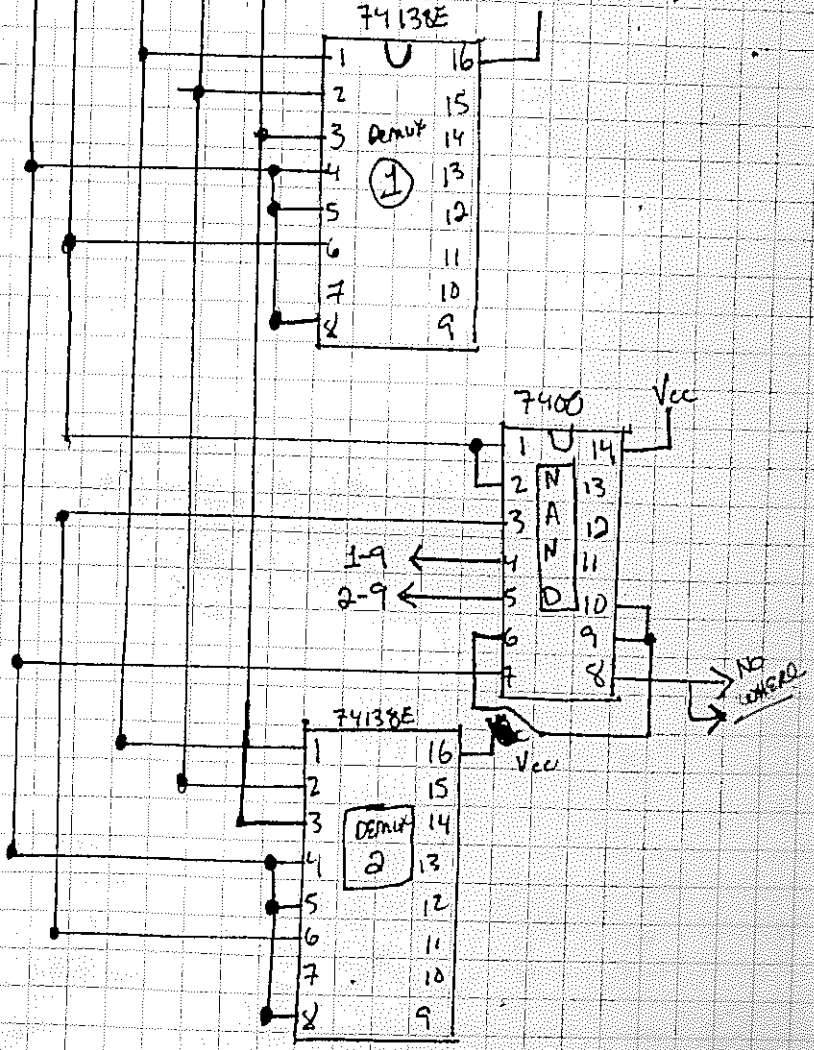

Note - Ed Swiatek program  
prc36.csi  
(JRMINE)

Dsmux outputs (Dsmux # - PIN)

(on Demux Board)  
20 PIN conn

Relay BOARD PIN (T=TOP, B=BOTTOM, B-#)

|                              |    |
|------------------------------|----|
| 1-15                         | 1  |
| 1-14                         | 2  |
| 1-13                         | 3  |
| 1-12                         | 4  |
| 1-11                         | 5  |
| 1-10                         | 6  |
| 2-15                         | 7  |
| 2-14                         | 8  |
| 2-13                         | 9  |
| 2-12                         | 10 |
| 2-11                         | 11 |
| 2-10                         | 12 |
| 1-9                          | 13 |
| 2-9                          | 14 |
| 1-7                          | 15 |
| C-2 (control port on logger) | 16 |
| 2-7                          | 17 |
| C1                           | 18 |
| C4                           | 19 |
| C3                           | 20 |

|         |
|---------|
| T-1-B-2 |
| T-1-B-3 |
| T-1-B-4 |
| T-1-B-5 |
| T-1-B-6 |
| T-1-B-7 |
| T-1-B-8 |
| T-1-B-9 |
| B-1-B-2 |
| B-1-B-3 |
| B-1-B-4 |
| B-1-B-5 |
| B-1-B-6 |
| B-1-B-7 |
| B-1-B-8 |
| N/C     |
| B-1-B-9 |

N/C  
N/C  
N/C

PIN 25 => +5VDC

(1=111)  
C4-C1 in program

Relay (T=TOP, B=BOTTOM, #)

LEVEL

Value

AMP  
CONNECTOR

|      |     |           |           |    |
|------|-----|-----------|-----------|----|
| 1000 | T-0 | 1         | 51        | 16 |
| 1100 | T-1 | 2         | 52        | 15 |
| 1010 | T-2 | 3         | 53        | 14 |
| 1110 | T-3 | 4         | 54        | 13 |
| 1001 | T-4 | 5         | 55        | 12 |
| 1101 | T-5 | 6         | 56        | 11 |
| 0000 | T-6 | 7         | 57        | 10 |
| 0100 | T-7 | 8         | 58        | 9  |
| 0010 | B-0 | 9         | 59        | 8  |
| 0110 | B-1 | 10        | 510       | 7  |
| 0001 | B-2 | 11        | 511       | 6  |
| 0101 | B-3 | 12        | 512       | 5  |
| 1011 | B-4 | 13        | 513 (New) | 4  |
| 0011 | B-5 | 14        | 514 (New) | 3  |
| 1111 | B-6 | ZERO (15) | 514 + 515 | 2  |
| 0111 | B-7 | SPAN (16) | 516 + 517 | 1  |

Campbell programs: DBLPRO3.CSI = 14 lines - cals every 245 min  
DBLPRO4.CSI = 12 lines - cals every 240 min

FOR TESTING:

36 + 45 = # of LINES AS ABOVE; 15 sec levels + cals every 10 min.

Problems

6/16/01 - power supply to serial channels in DUCK  
went bad  $\Rightarrow$  DUCK computer still OK

Mod

115 - 6A

 $+12V - 10A$



Profiler Calibration

6-27-01

1 M - Monson Tower (w/N<sub>2</sub>) -2.029

7/20/01 Power Distribution

Bottom - 6A  
Med. - 2.4A  $\Rightarrow$  PTRAC pump running  
Top - 3.0A  
Extra - < 1A

7/17/01

SFG CABLE

Fast 23x

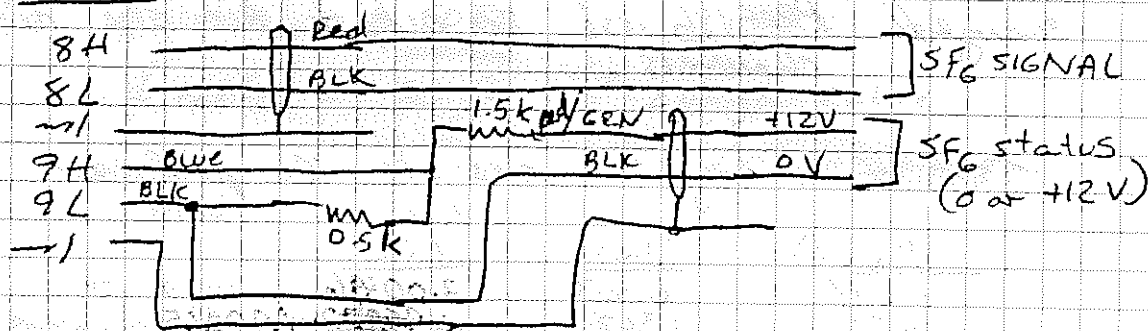

Need to output channels 8+9 (already doing 8)

## Double Profiler

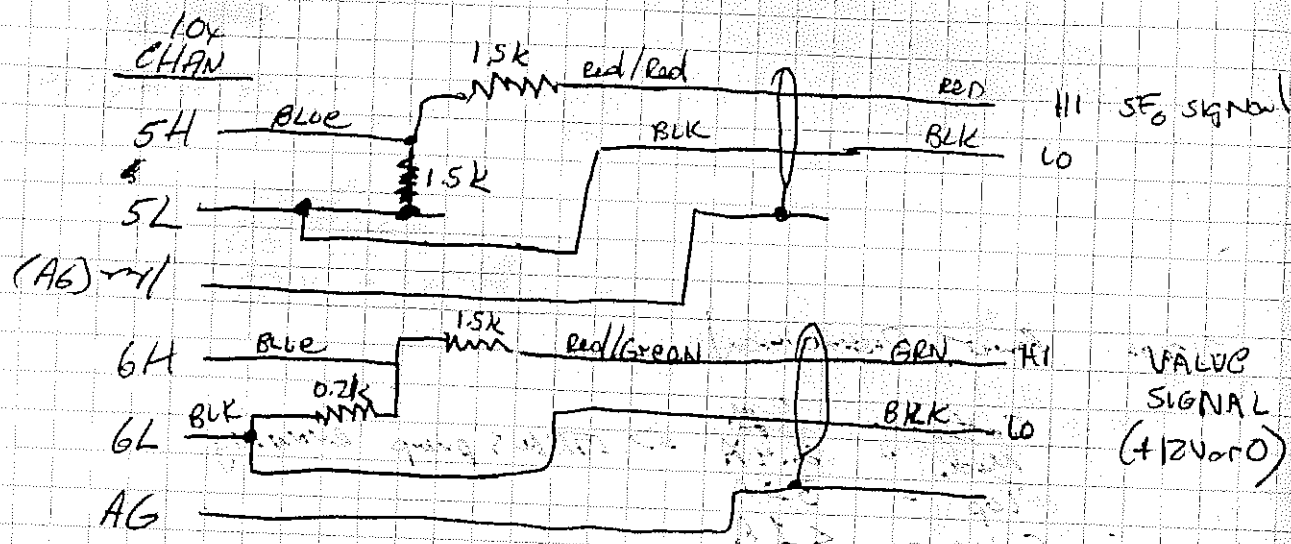

changed Fast23x4.csi To output channel 9  
(TOTAL OF 19 dids)

changed Prof14b.csi To output all six differential channels.

## Test of voltage dividers in 10x profiler

| $V_{in}(V)$ | $V_{out}$ | $V_{in}/V_{out}$           |
|-------------|-----------|----------------------------|
| 0.808       | 0.403     | 2.0046                     |
| 2.71        | 1.362     | <del>1.99265</del> 1.99265 |
| -0.012      | -0.006    | 2.000                      |
| 1.371       | 0.685     | 2.00146                    |
| 1.376       | 0.686     | 2.00583                    |

Avg. =  $2.001 \pm 0.006$  (1σ)  
(5 meas.)

## HANDAR CABLE

## HANDRA connectors

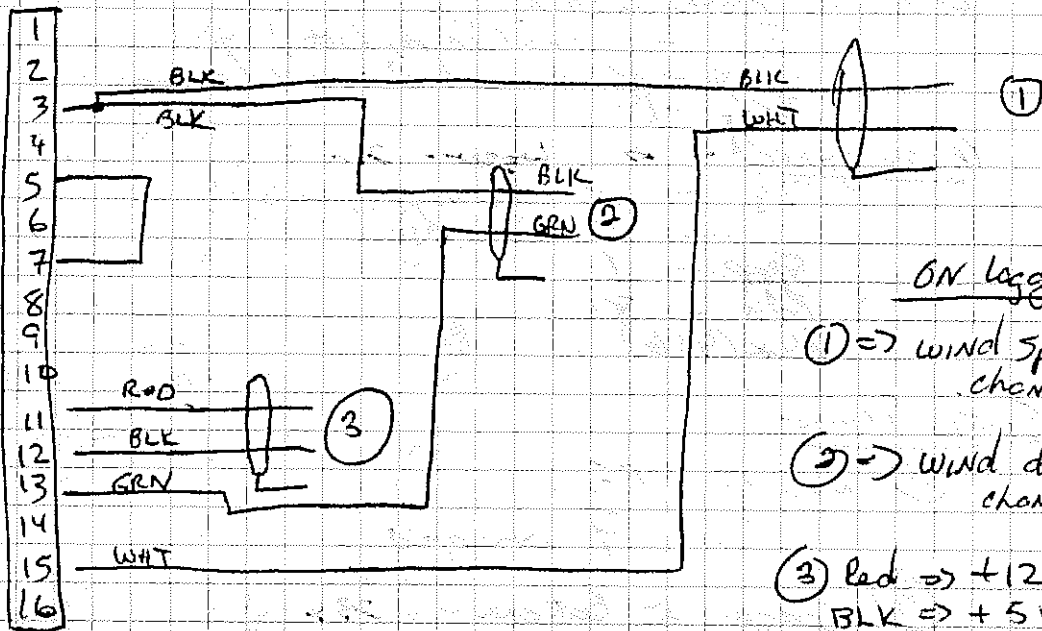

1 cable = 650 ft

$L_{\text{cable}} = 80 \text{ ft}$  ? ENOUGH cable)

Need TO TIE Lo side of OV (G) Together  
Need

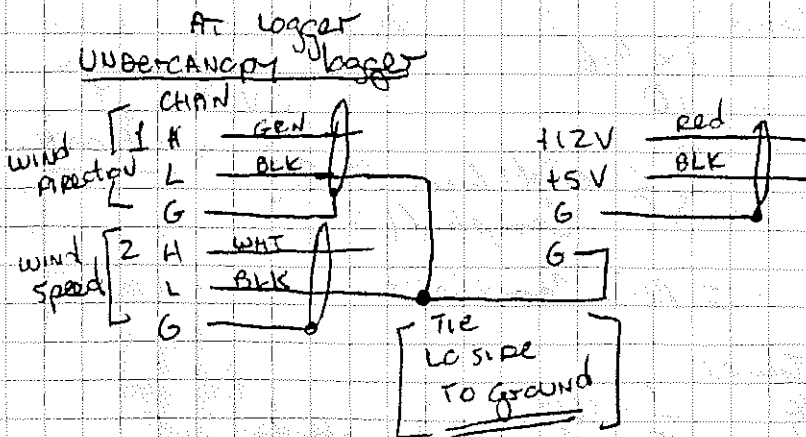

# 8/10/01 Equipment Inventory -

Tc = thermocouples  
Pd = photodiodes  
SMP = Soil Moisture Probe

## Main Tower

- (A) Muxen platform (416)  
Tcs - 1 end in box (ref)  
Pd's - 5 connected to Mux (Omegas)  
Pd's - 14

- (B) ON GROUND - Logger - 21x  
Tcs - 10 (B.N. Campbells)  
- 5 Omegas  
SMP - 1  
Pd's - 8  
Mux (416)

## South Tower

- (A) Mux AT TOP:  
Tc - 7 Omegas  
(B) Logger AT Bottom - 23x  
Mux - 1 416  
- 1 AM25T  
Tcs - 4 Campbell  
- 7 Omegas  
SMP - 1  
8 sap flow sensors

## Middle Tower

- (A) Mux's in Woods  
Mux - 2x 416  
HFTs - 10  
RTDs - 5  
Tcs - 1 end here (ref.)  
9 Campbell  
SMP - 1  
UNCONN.  
(B) AT 23x  
Tcs - 2 Ref. Campbells  
(C) BASE OF Tower  
Mux - 1x 416  
Tcs - 15+ 1 ref Campbell

① Mid. of Tower

21x Logger

Mix - 1x 416

Tcs 4x Campbells

SNP - 1 Omegas

Pds - 13

4 other cables

② Top of Tower

Mix - 416

Tc - 6 + 4 ref. - Omegas

Pds - 15

North Tower

(A) Bottom of Tower

10x DATA LOGGER

Mix 1x 416

1x 25T

Tcs - 12 Campbells

SNP 1 Omegas

8 sap from sensors

Pds 15 (at least)

(B) Top of Tower

Mix 416

Pds - 8

(2 Licor)

AT-BALLER

SNP - 3

OFFICE

Tc - 1

Campbell



10/8/01

# WIRING FOR DATA LOGGERS IN SPRING EXP

Thermocouple 23x

Program: Tc23x6.csi

## CHANNELS

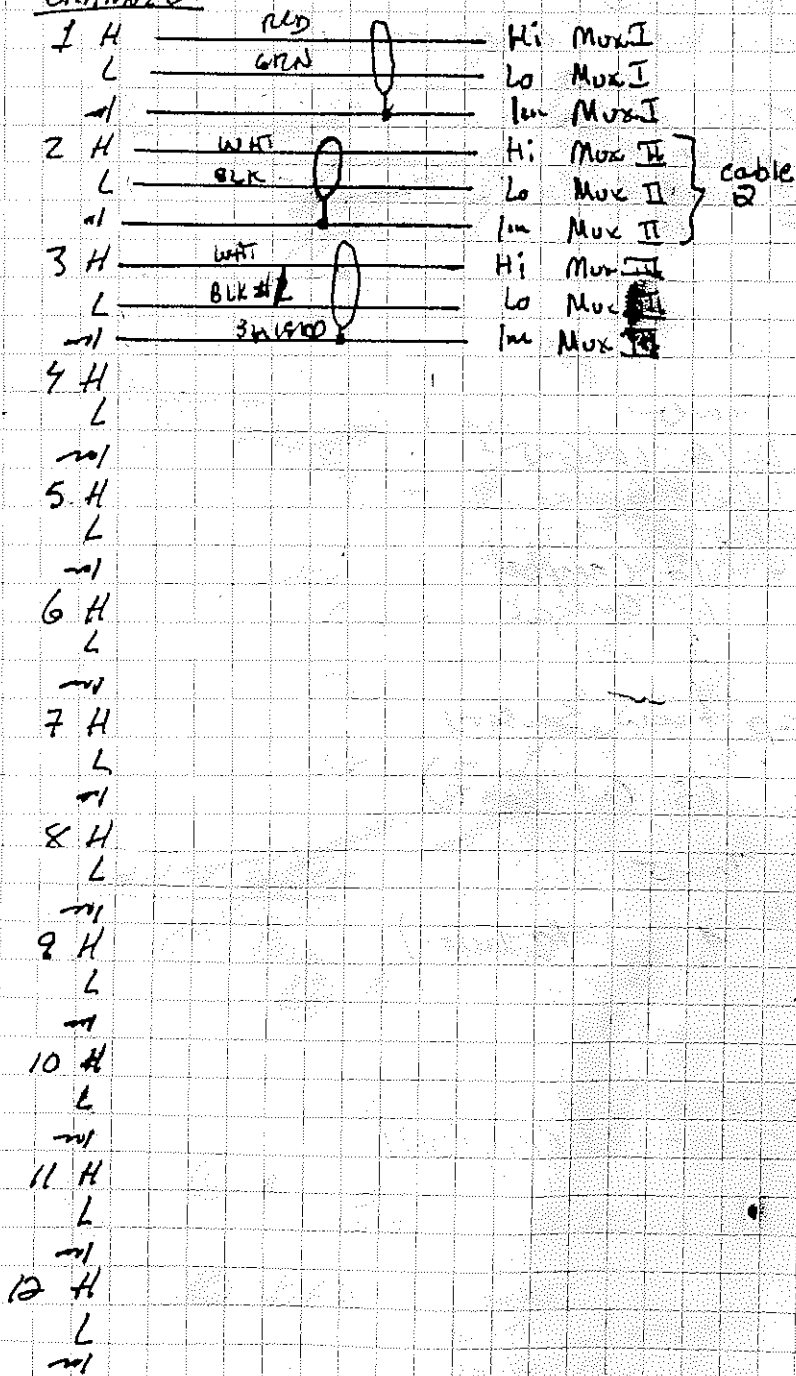

## Control Ports

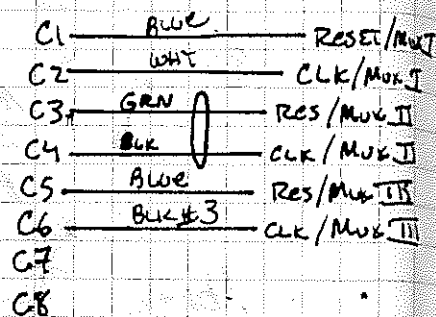

## Excite

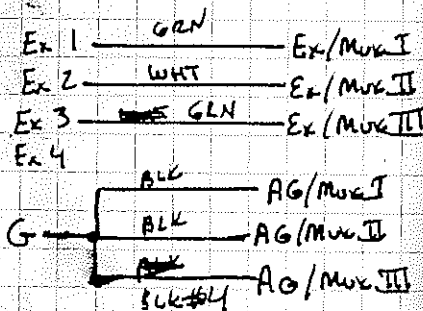

## Power

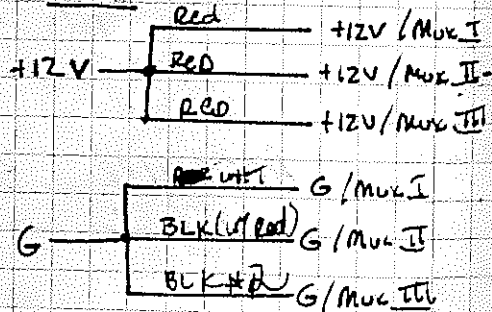

Soil 23x

Program: Soil23x.cs

SE

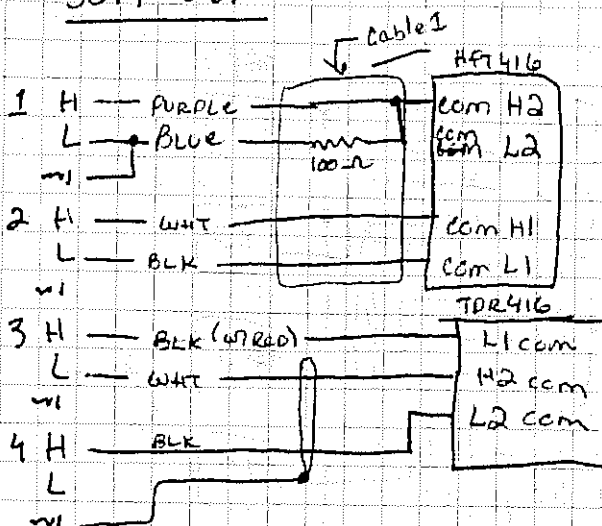

CONTROL PORTS

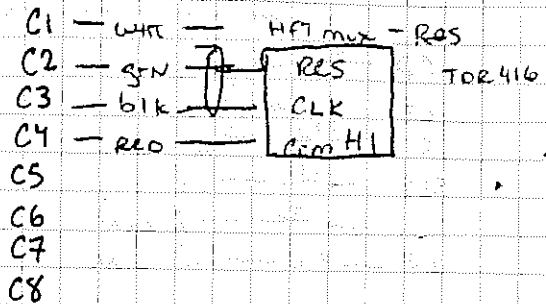

Excite

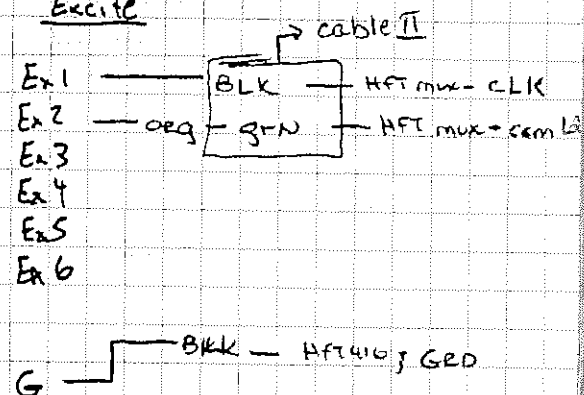

Power

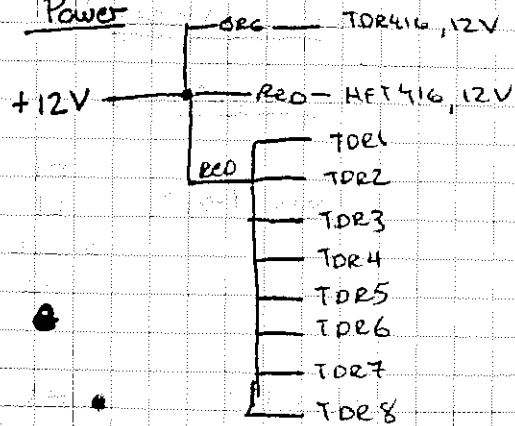

5 3 H — BLK (w/Red)

6 L — WHT

7 4 H — BLK

8 L — (blank)

9 H

10 L

11 H

12 L

## TOE MUX WIRING

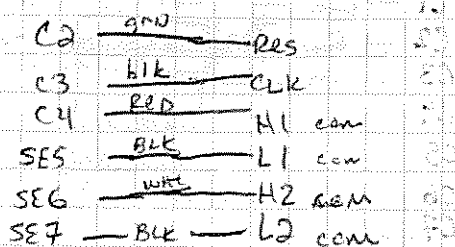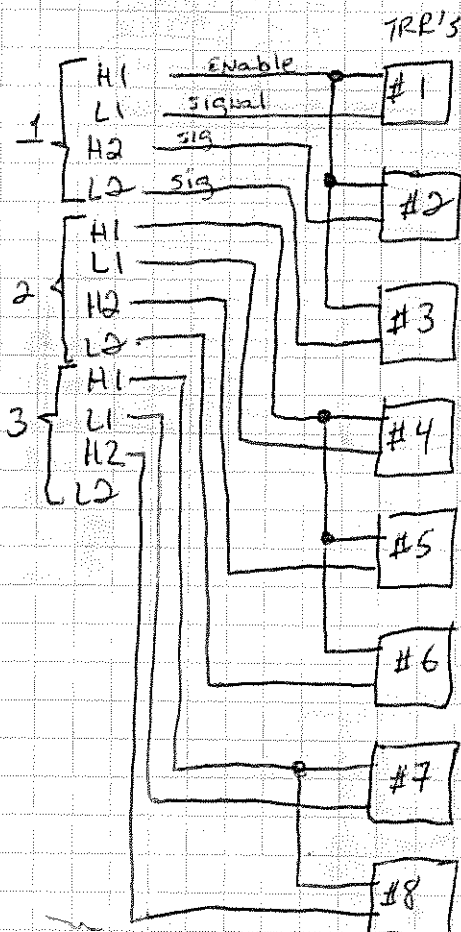

## HFT MUX WIRING

For inputs - see last page

outputs

Sets 1-10

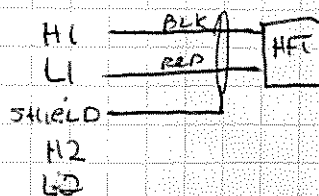

Sets 11-15

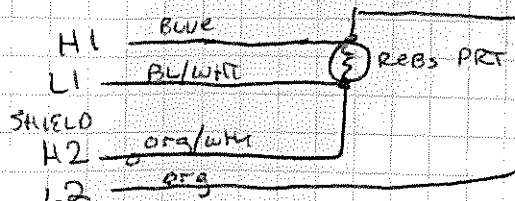

Fast23x

Program: Fast23x4.csi

Input channels

Control Ports

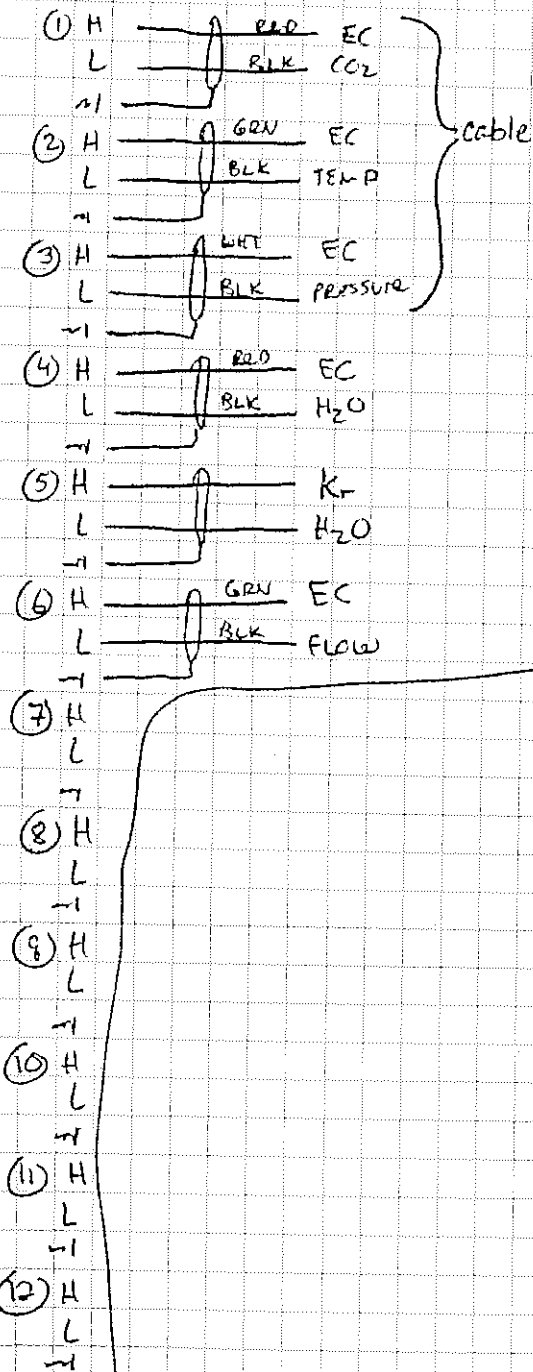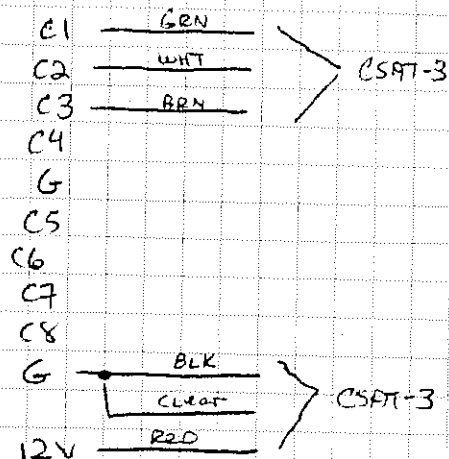

See later page

~~THA~~

# DATA LOGGER WIRING A5 OF JAN, Mar, 2002

Logger : Fast23.  
Type : 23x  
Location : z=17m . Level# 9  
Program : fast23x4.csi

## Channels :

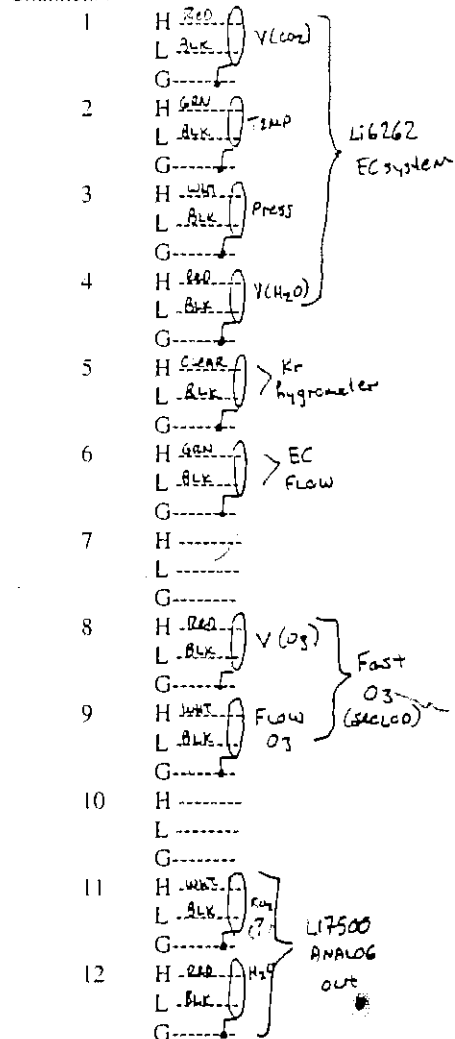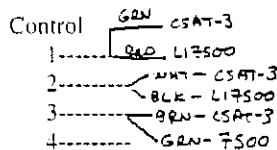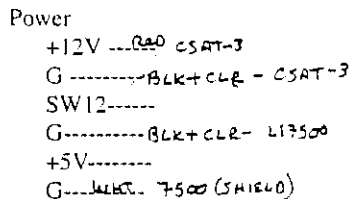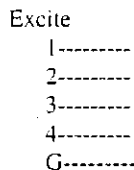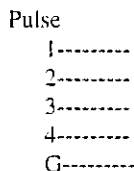

Sensors : CSAT-3 sonic, Li6262 (fast CO2 + q), Kr hyg., LI7500 (open path CO2 + q), Fast O3

## CHANNEL 201 outputs

~~g. ec~~  
U  
V  
W  
T  
ding  
O3 stat  
CO2.ec  
T.ec  
P.ec  
g.ec  
g.kr  
Flow.ec  
Fast O3  
CO2 obs  
g. abs  
p. kpc  
CO2 anal  
H2O anal



Logger name : CNR  
 Type : 23x  
 Location : z = 26m, Level #14  
 Program : cnr30.csi

# Channels :

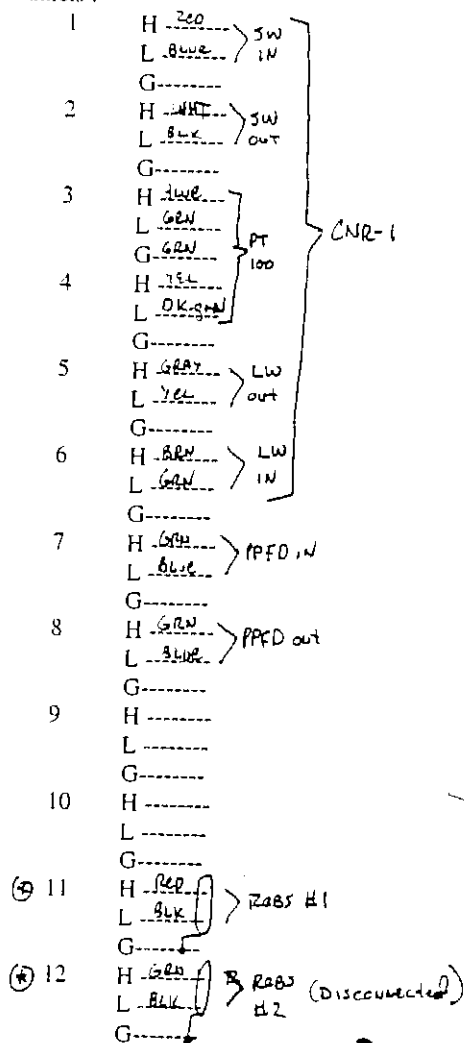

## Control

1-----  
 2-----  
 3-----  
 4-----  
 5-----  
 6-----  
 7-----  
 8-----

## Power

+12V-----  
 G-----  
 SW12-----  
 G-----  
 +5V-----  
 G-----

## Excite

1 Red } PT100 - CNR-1  
 2-----  
 3-----  
 4-----  
 G Blk

## Pulse

1-----  
 2-----  
 3-----  
 4-----  
 G-----

Sensors : CNR-1 radiometer, LiSA190A quantum sensors (3), REBS Q\*7.1 radiometer (2)

⑪ This cable leads to  
 Junction box - 3 possible  
 sensor can be connected

Logger name : Profiler: z= 11m, Level #  
 Type : 23X  
 location : z= 11 m, Level #6  
 Program : prof30.csi

#### Channels :

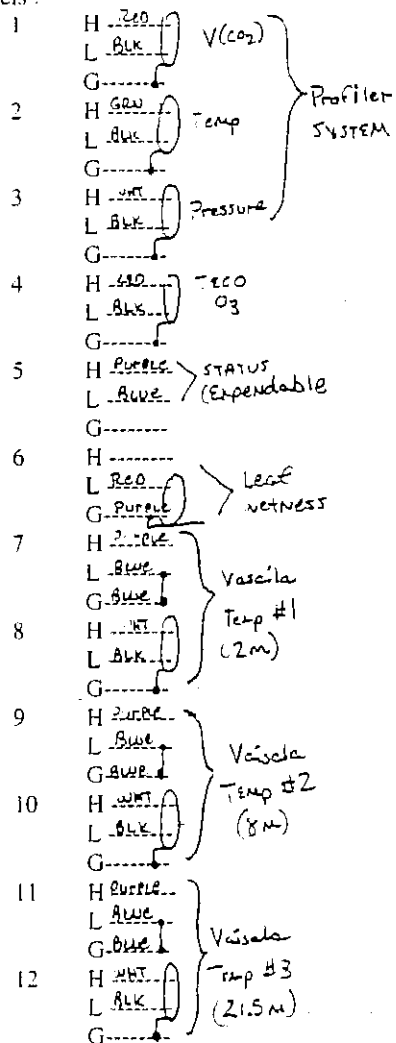

#### Control

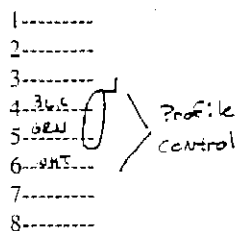

#### Power

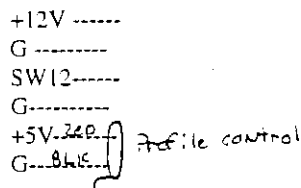

#### Excite

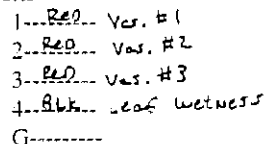

#### Pulse

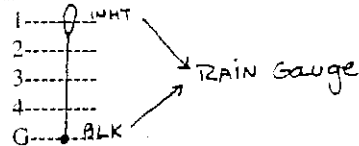

Sensors : Li6251 (Profiler), Leaf Wetness. HMP35D Temperature (3). Rain Gage.

Logger name : MetA.  
 Type : 23x  
 Location : z=9 m . Level #5  
 Program met30bcsi

#### Channels :

- 1 H WHT } U-dir  
L BLK } 2m, 26m  
G-----
- 2 H----- } POSSIBLE BAD  
L-----  
G-----
- 3 H WHT } U-dir  
L BLK } RMT, 16m  
G-----
- 4 H-----  
L-----  
G-----
- 5 H WHT } RH #1  
L BLK } 2m  
G-----
- 6 H WHT } RH #2  
L BLK } 8m  
G-----
- 7 H WHT } RH #3  
L BLK } 21.5m  
G-----
- 8 H RED } PT101R  
L BLK } Pressure  
G-----
- 9 H GEN } 3-sp  
L BLK } RMT 26m  
G-----
- 10 H GEN } 3-sp  
L BLK } RMT, 16m  
G-----
- 11 H RED } Handar  
L BLK } U-dir (9m)  
G-----
- 12 H WHT } Handar  
L BLK } 6-sp  
G-----

#### Control

- 1-----
- 2 GEN } EC CONTROL
- 3 BLK }
- 4-----
- 5-----
- 6-----
- 7-----
- 8-----

G BLK EC control

#### Power

- +12V-----
- G-----
- SW12-----
- G-----
- +5V BLK-----
- G-----

- |     |        |
|-----|--------|
| RED | HANDAR |
| RED | RMT 26 |
| RED | RMT 16 |
| WT  | PRESS  |
| RED | EC CON |
| RED | RH #   |
| RED | RH #   |
| RED | RH #   |
| BLK | HAND   |
| BLK | RMT    |
| BLK | RMT    |
| BLK | PRESS  |
| BLK | EC CON |
| BLK | RH #   |
| BLK | RH #   |
| BLK | RH #   |

#### Excite

- 1-----
- 2-----
- 3-----
- 4-----
- G-----

#### Pulse

- 1-----
- 2-----
- 3-----
- 4-----
- G-----

Sensors : RM Young propvanes (2), HMP-35D humidity sensors (3), Pressure, EC control,  
 Handar 2-D sonic (at 9m)

Logger name : Twosonic, small tower  
 Type : 23x  
 Location : base of small tower  
 Program : twosonic.esi

Channels :

|    |              |                    |
|----|--------------|--------------------|
| 1  | H <u>GRN</u> | } HANDAR<br>u-dir. |
|    | L <u>BLK</u> |                    |
|    | G-----       |                    |
| 2  | H <u>WHT</u> | } HANDAR<br>1-spd  |
|    | L <u>BLK</u> |                    |
|    | G-----       |                    |
| 3  | H-----       |                    |
|    | L-----       |                    |
|    | G-----       |                    |
| 4  | H-----       |                    |
|    | L-----       |                    |
|    | G-----       |                    |
| 5  | H-----       |                    |
|    | L-----       |                    |
|    | G-----       |                    |
| 6  | H-----       |                    |
|    | L-----       |                    |
|    | G-----       |                    |
| 7  | H-----       |                    |
|    | L-----       |                    |
|    | G-----       |                    |
| 8  | H-----       |                    |
|    | L-----       |                    |
|    | G-----       |                    |
| 9  | H-----       |                    |
|    | L-----       |                    |
|    | G-----       |                    |
| 10 | H-----       |                    |
|    | L-----       |                    |
|    | G-----       |                    |
| 11 | H-----       |                    |
|    | L-----       |                    |
|    | G-----       |                    |
| 12 | H-----       |                    |
|    | L-----       |                    |
|    | G-----       |                    |

Control

|        |     |          |
|--------|-----|----------|
| 1----- | GRN | } CSAT-3 |
| 2----- | WHT |          |
| 3----- | BLN |          |
| 4----- |     |          |
| 5----- |     |          |
| 6----- |     |          |
| 7----- |     |          |
| 8----- |     |          |

Power

|              |                   |  |
|--------------|-------------------|--|
| +12V-----    | <u>CO</u> CSAT-3  |  |
| G-----       | <u>GRN</u> HANDAR |  |
| SW12-----    | <u>BLK</u> CSAT-3 |  |
|              | <u>CLR</u>        |  |
| G-----       |                   |  |
| +5V-BLK----- | HANDAR u-dir      |  |
| G-----       |                   |  |

Excite

|        |
|--------|
| 1----- |
| 2----- |
| 3----- |
| 4----- |
| G----- |

Pulse

|        |
|--------|
| 1----- |
| 2----- |
| 3----- |
| 4----- |
| G----- |

Sensors : Csat-3 sonic (2), Handar 2-D sonic

Logger name : ~~Profile: 2-11m, Level#~~ UC-EC  
 Type : ~~21x~~ 21x  
 location : ~~2-11m, Level#6~~ North canopy Access Tower (TRIANG. Tower)  
 Program : ~~prof30.ch~~ 21SONIC.CSI

Channels :

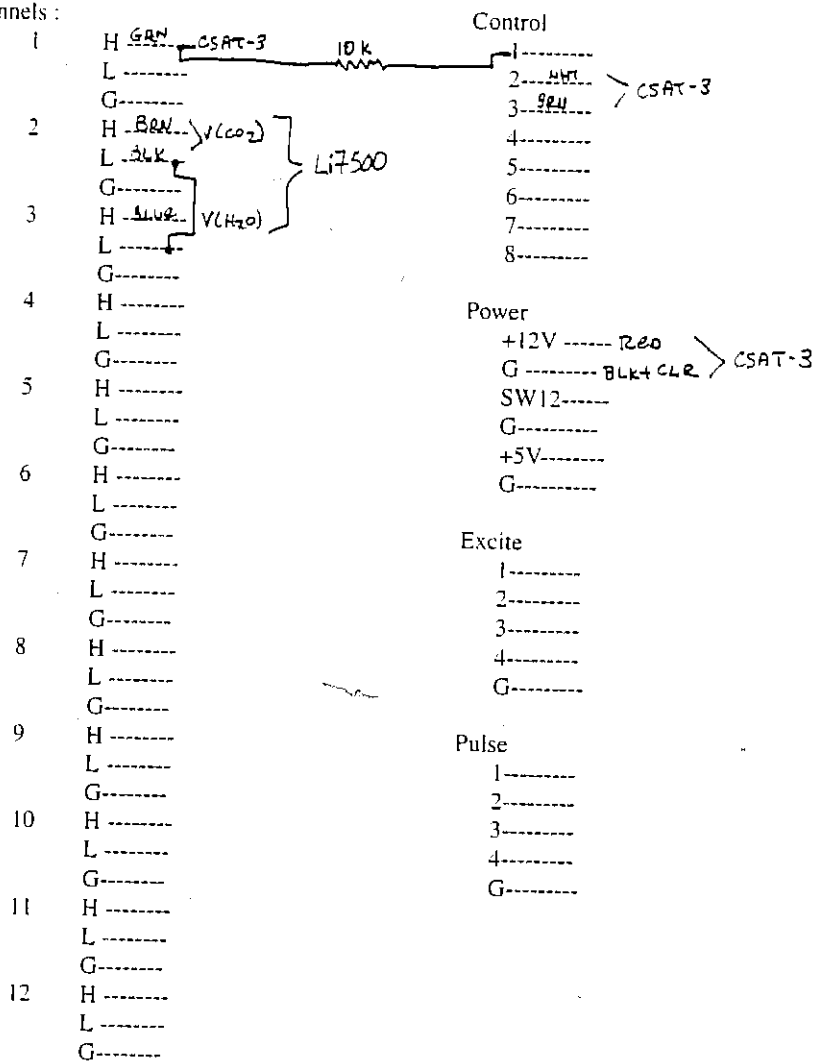

Sensors : Li6251 (Profile), Leaf Wetness, HMP35D Temperature (3), Rain Gage.  
 CSAT-3, Li7500



Logger name : Soil23xA

Type : 23x

Location : Base of North canopy access tower — ALONG PATH

Program : soil23x.csi → SOILSHOW.CSI

CHANGES IN RED -

Oct 28 2003

#### Channels :

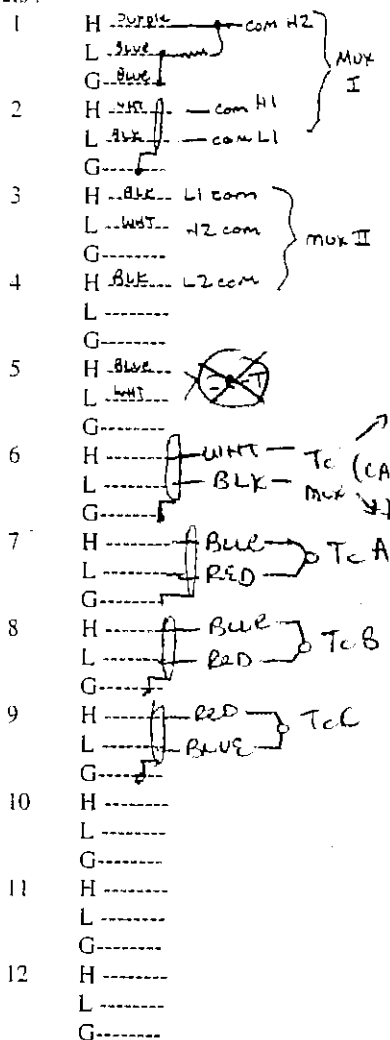

#### Control

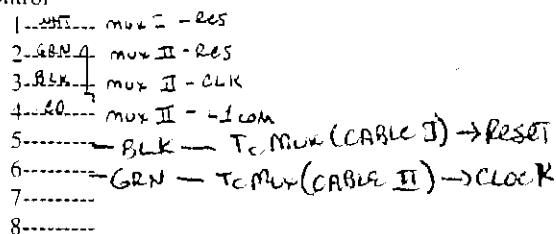

#### Power

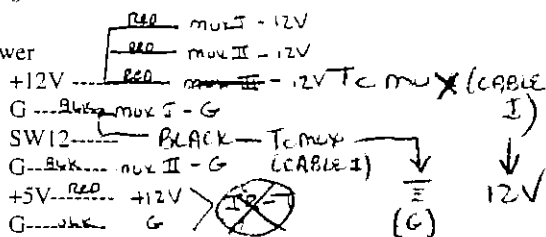

#### Excite

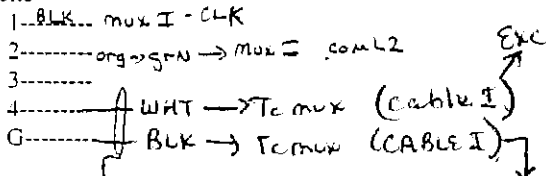

#### Pulse

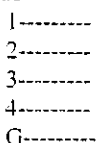

Sensors : HFT-1 soil heat flux (10), STP=1 soil Temp. (5), CS615 soil water reflectometer (8)

1-IR thermometer

For soil23x => Two AM416 mux's

Mux I. Heat flux plates and soil RTDs

Channels :

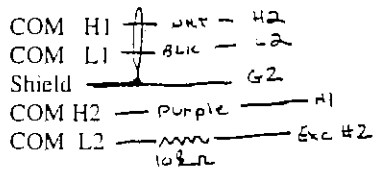

Control

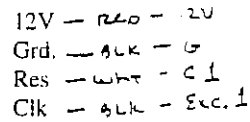

Sets 1 -> 10

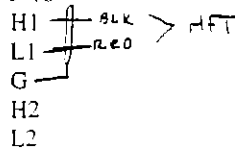

Sets 11 -> 15

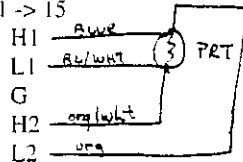

Mux II. CS-615 - soil moisture

Channels :

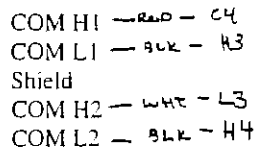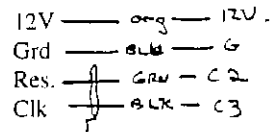

Sets : 1 -> 3

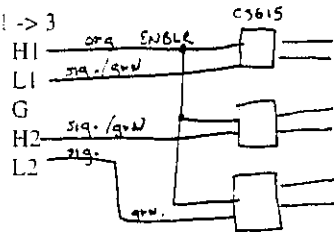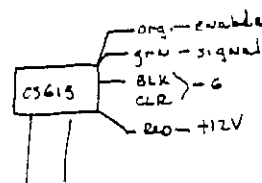

Logger Name : Thermocouples.23x  
 Type : 23x  
 Location : Level #1, N. canopy access tower  
 Programs : Tc23x.esi

# Channels :

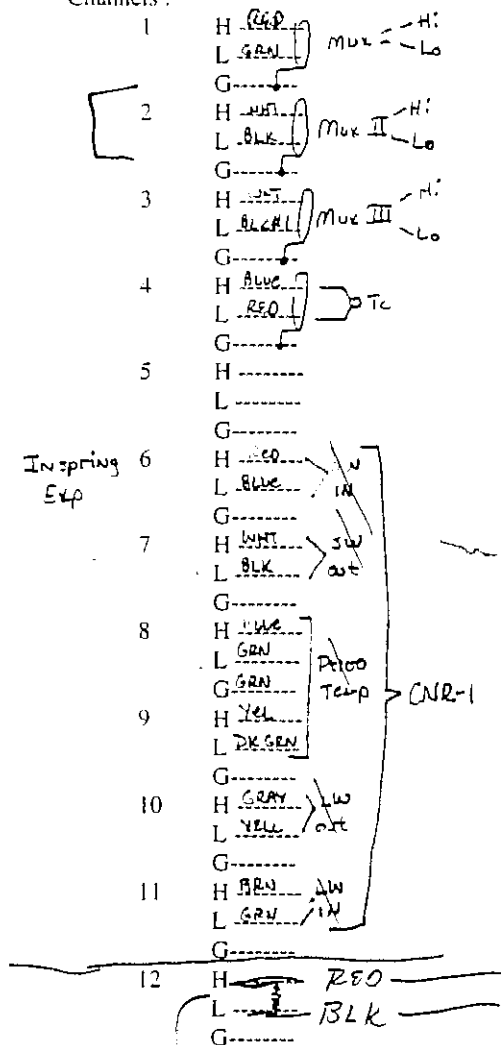

# Control

1-BLU Mux I - RES  
 2-WHT Mux I - CLK  
 3-GRN Mux II - RES  
 4-BLU Mux II - CLK  
 5-BLU Mux III - RES  
 6-BLK#3 Mux III - CLK  
 7-  
 8-

Power  
 +12V -12V Mux I - 12V  
 G-WHT Mux I - G  
 SW12-  
 G-BLK Mux II - G  
 +5V-  
 G-BLK#2 Mux III - G

# Excite

1-P-GRN Mux I - EXC  
 2-WHT Mux I - EXC  
 3-GRN Mux II - EXC  
 4-BLK CNR-1 PT-100  
 G-BLK CNR-1  
 G-BLK Mux I - AG  
 G-BLK Mux II - AG  
 G-BLK#4 Mux III - AG

Pulse  
 1-  
 2-  
 3-  
 4-  
 G-

Sensors : 107-L type T thermocouples (75), CNR-1 (spring, 2002)

measure the resistance

775  $\Omega$

# For Tc23x : 3 Thermocouple multiplexers

## Mux I.

12V — RED — 12V  
 Grd. — WHT — G  
 Res. — BLUE — C1  
 Clk. — WHT — C2  
 Exc. — P, GRN — Exc 1  
 AG — BLK — G

Hi — RED — HI 1  
 Lo — GRN — LO 1  
 G — — —

Sets : 1 -> 25

HI — BLUE  
 LI — RED  
 G — — —

## Mux II.

12V — RED — 12V  
 Grd. — BLK — G  
 Res. — GRN — C3  
 Clk. — BLK — C4  
 Exc. — WHT — Exc. 2  
 AG — BLK — G

Hi — WHT — HI 2  
 Lo — BLK — LO 2  
 G — — —

Sets : 1 -> 25

HI — BLUE  
 LI — RED  
 G — — —

## Mux III.

12V — RED — 12V  
 Grd. — BLK #2 — G  
 Res. — BLUE — C5  
 Clk. — Black #3 — C6  
 Exc. — GRN — Exc #3  
 AG — Blk #4 — G

Hi — WHT — HI 3  
 Lo — BLK #1 — LO 3  
 G — — —

Sets : 1 -> 25

HI — BLUE  
 LI — RED  
 G — — —

Logger name : Dendrometers :  
 Type : 21x  
 Location : on ground near mid. canopy access tower  
 Program : dendro.csi

Channels :

|    |         |
|----|---------|
| 1  | H ----- |
|    | L ----- |
|    | G ----- |
| 2  | H ----- |
|    | L ----- |
|    | G ----- |
| 3  | H ----- |
|    | L ----- |
|    | G ----- |
| 4  | H ----- |
|    | L ----- |
|    | G ----- |
| 5  | H ----- |
|    | L ----- |
|    | G ----- |
| 6  | H ----- |
|    | L ----- |
|    | G ----- |
| 7  | H ----- |
|    | L ----- |
|    | G ----- |
| 8  | H ----- |
|    | L ----- |
|    | G ----- |
| 9  | H ----- |
|    | L ----- |
|    | G ----- |
| 10 | H ----- |
|    | L ----- |
|    | G ----- |

Control

|        |
|--------|
| 1----- |
| 2----- |
| 3----- |
| 4----- |
| 5----- |
| 6----- |
| 7----- |
| 8----- |

Power

|            |
|------------|
| +12V ----- |
| G -----    |
| SW12-----  |
| G -----    |
| +5V -----  |
| G -----    |

Excite

|         |
|---------|
| 1-----  |
| 2-----  |
| 3-----  |
| 4-----  |
| G ----- |

Pulse

|         |
|---------|
| 1-----  |
| 2-----  |
| 3-----  |
| 4-----  |
| G ----- |

Sensors : automatic dendrometers :

REWIRING of Dendrometers

| CHANNEL (GNPOD) | DEND# | TREE | CHANNEL | DEND # | TREE |
|-----------------|-------|------|---------|--------|------|
| 2               | 1     |      | 6       | 7      |      |
| 3               | 3     |      | 7       | 6      |      |
| 4               | 2     |      | 8       | 9      |      |
| 5               | 5     |      | 9       | 8      |      |
|                 | 4     |      | 10      | 10     |      |



MKS Flowmeter connector => for substitute in Disjunct sampler

D-15

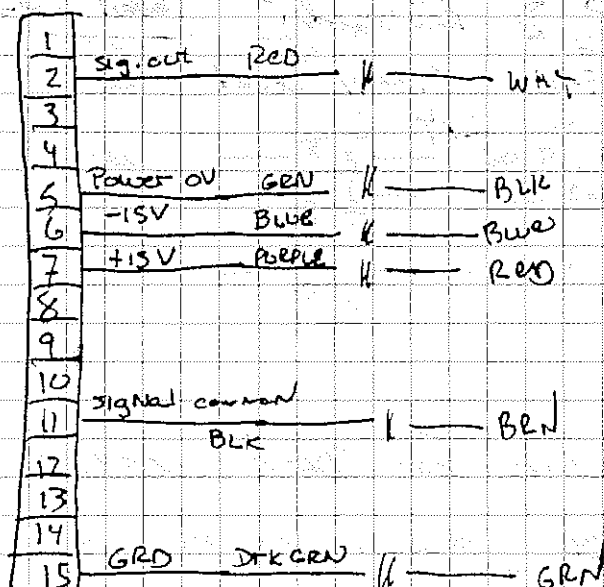

Serial Adapters for "New Duck"

Adapter goes from AMP 9-pin → DB-9 (Female)  
w/ 2 wires going off for +12V power

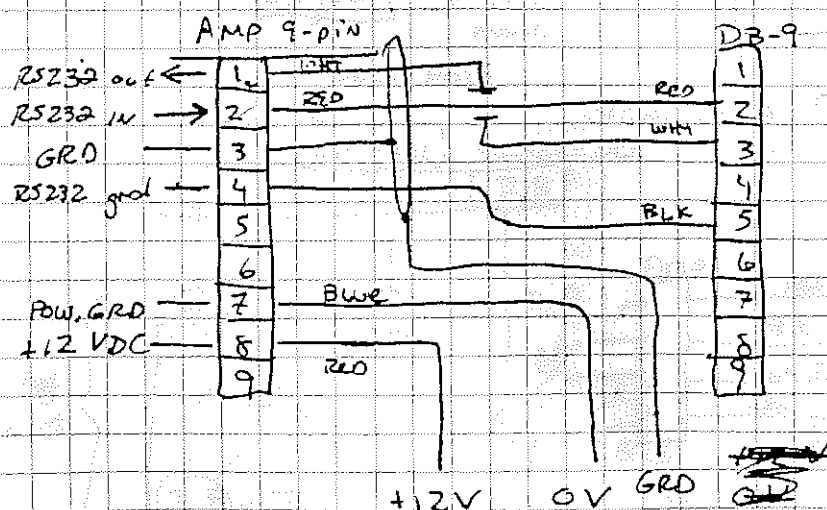

# Final Storage

01 0

2 ✓

3 w

4 t

5 diag

03 stat

analog 1. a1

2

3 → a#

4

5

6

7

8

CO2abs

h2Oabs

press

CO2 manual

h2O manual

a9

a10

a11

a12

a1 1V

CO2

a2 5V

temp

a3 1V

p

a4 1V

h2O.ec

a5

h2O.kr

6

7

8

9

10

11

12

5V

hook SF<sub>6</sub> to channel 7 or 8
